# Supplementary material for: The wtf meiotic driver gene family has unexpectedly persisted for over 100 million years
Source: eLife journal article supplement (doi:10.7554/elife.81149), 2022-09-21

*wtf60(SOCG\_04742)Δ/wtf60(SOCG\_04742)+* heterozygous diploid

## YEST plate

## G418 plate

DY47921 cross-1  
Successful octad: 11

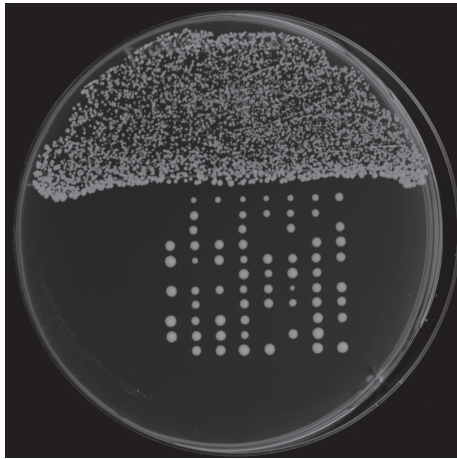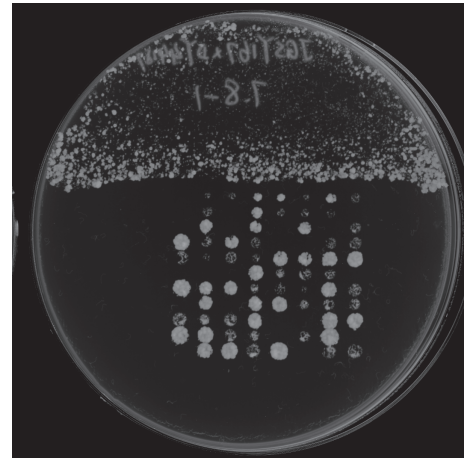

DY47921 cross-2  
Successful octad: 11

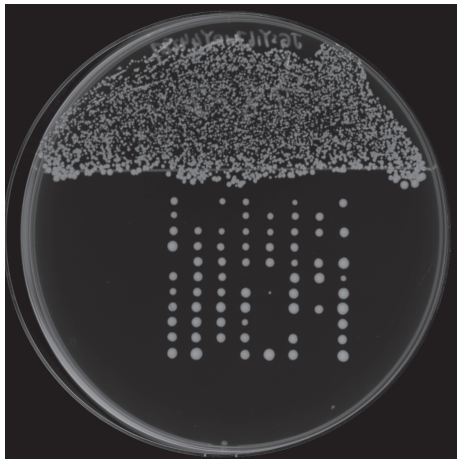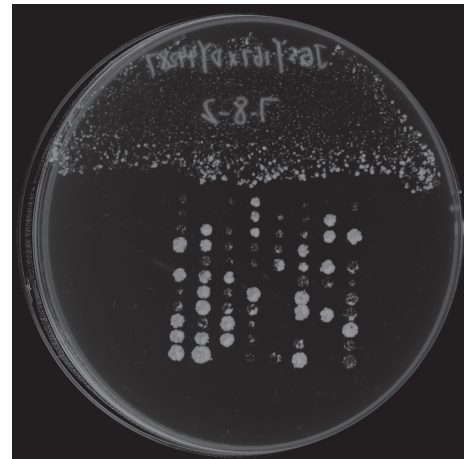

DY47921 cross-3  
Successful octad: 10

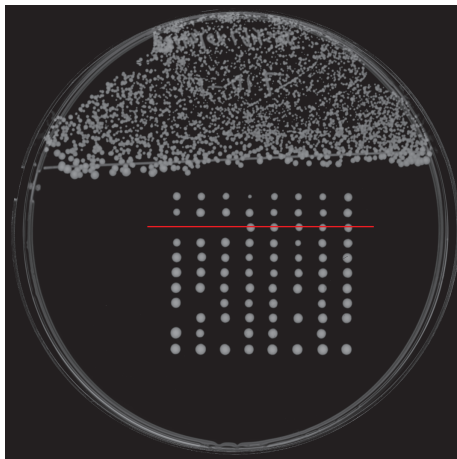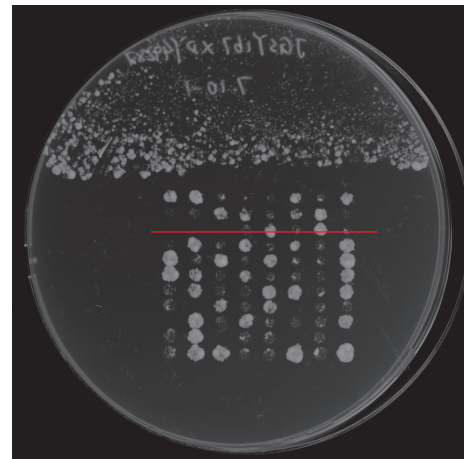

DY47921 cross-4  
Successful octad: 3

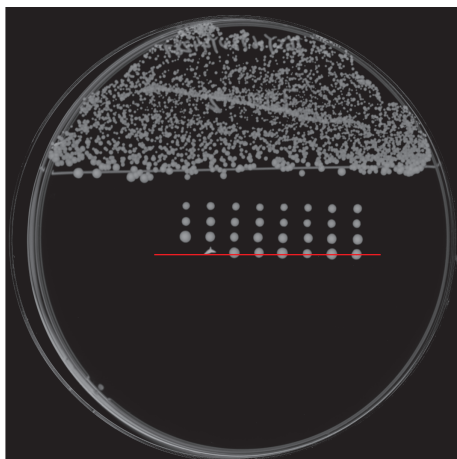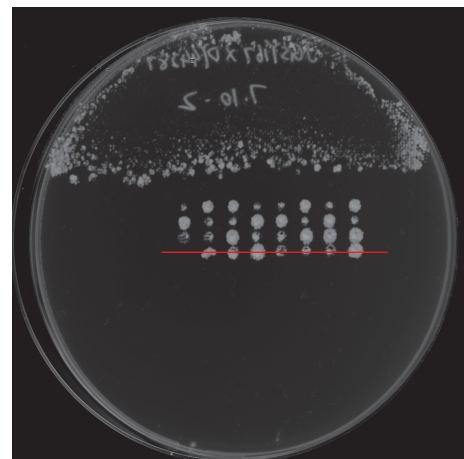

*wtf60(SOCG\_04742)Δ/wtf60(SOCG\_04742)+* heterozygous diploid

## YEST plate

## G418 plate

DY47921 cross-5  
Successful octad: 10

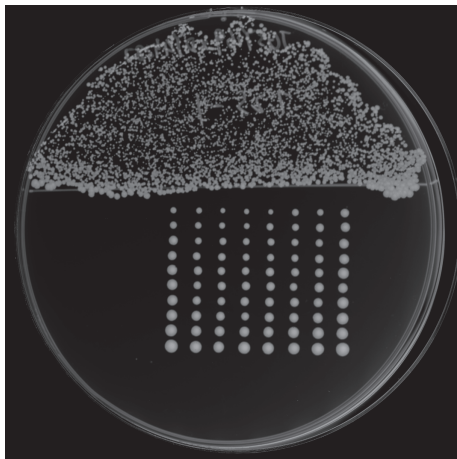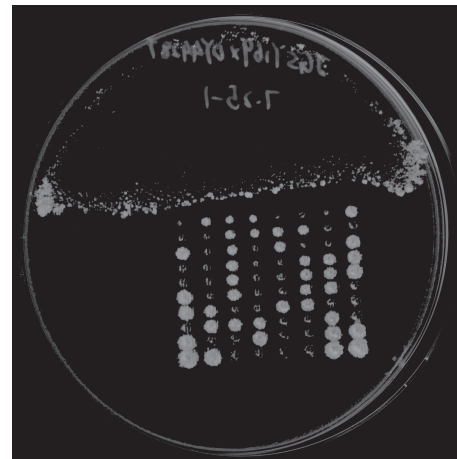

DY47921 cross-6  
Successful octad: 11

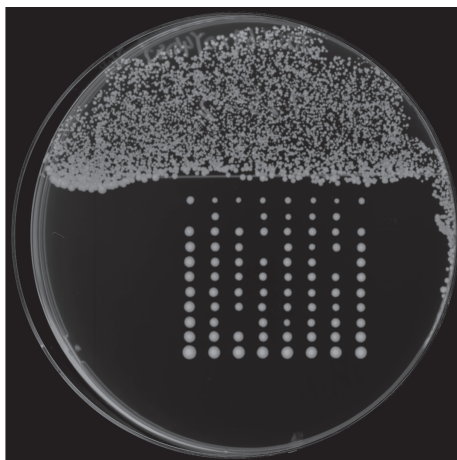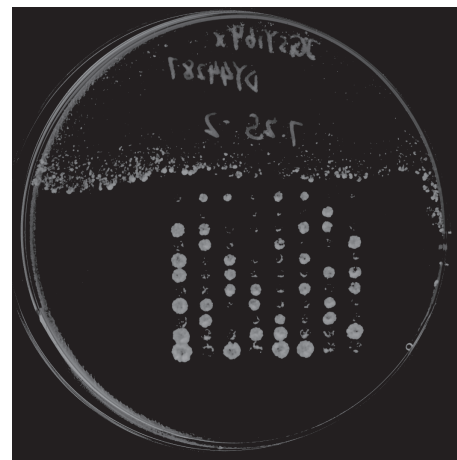

DY47921 cross-7  
Successful octad: 10

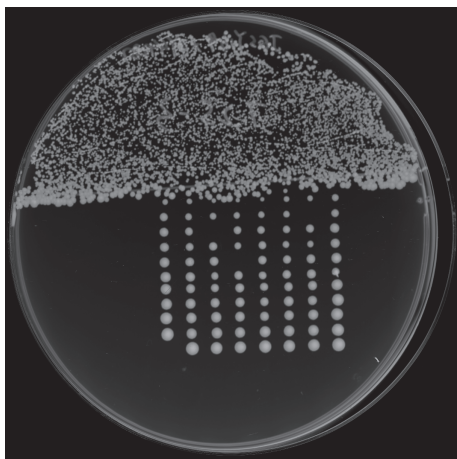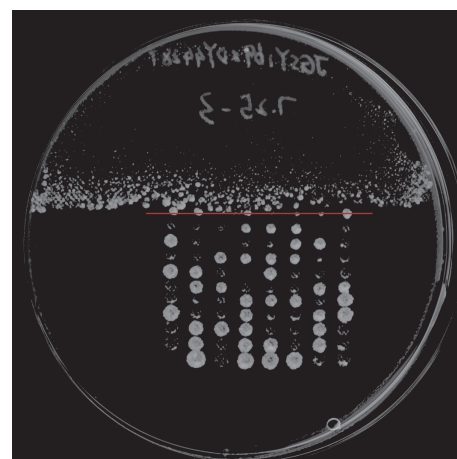

*wtf60(SOCG\_04742)Δ/wtf60(SOCG\_04742)+* heterozygous diploid

## YEST plate

## G418 plate

DY47922 cross-1  
Successful octad: 11

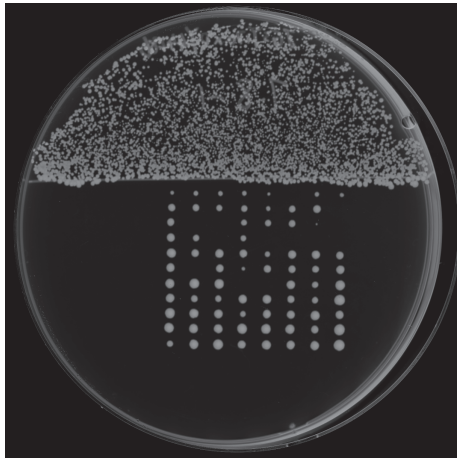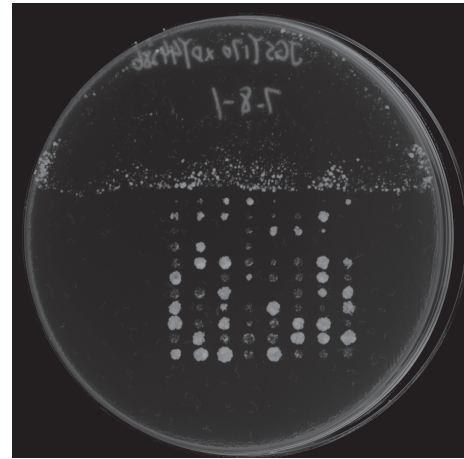

DY47922 cross-2  
Successful octad: 11

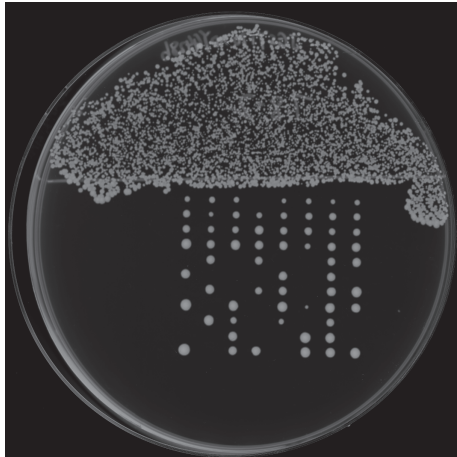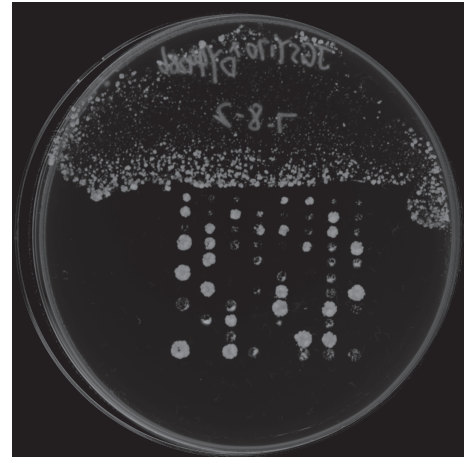

DY47922 cross-3  
Successful octad: 11

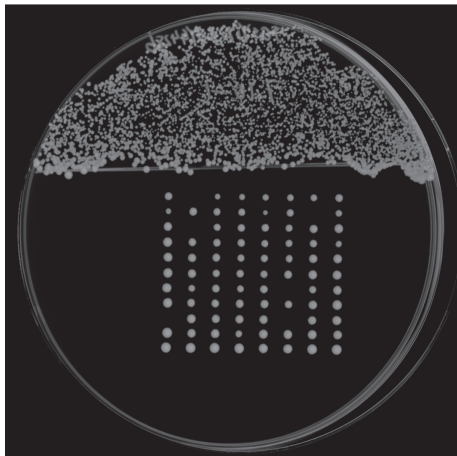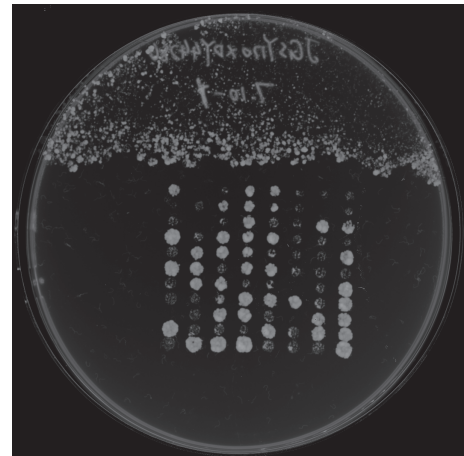

DY47922 cross-4  
Successful octad: 11

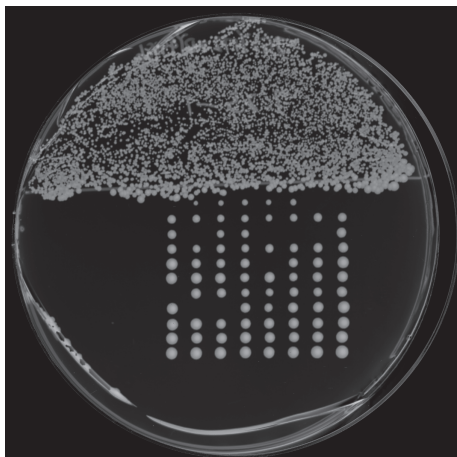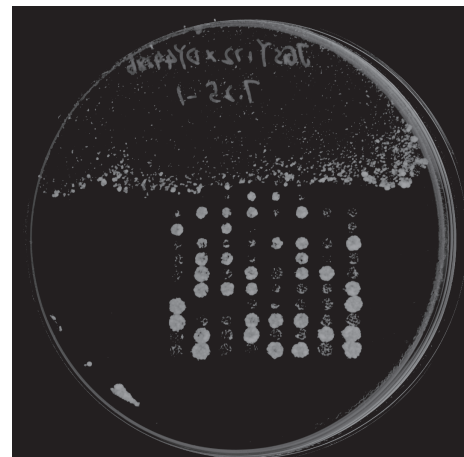

*wtf60(SOCG\_04742)Δ/wtf60(SOCG\_04742)<sup>+</sup>* heterozygous diploid

## YEST plate

## G418 plate

DY47922 cross-5  
Successful octad: 10

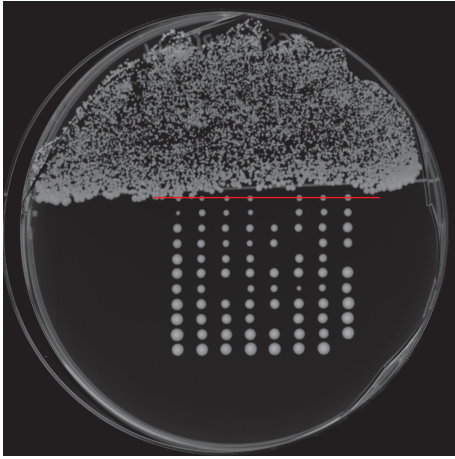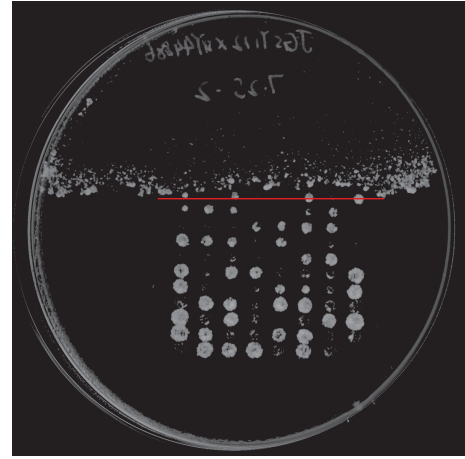

DY47922 cross-6  
Successful octad: 11

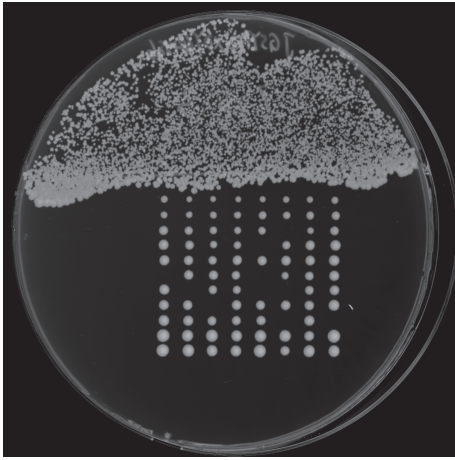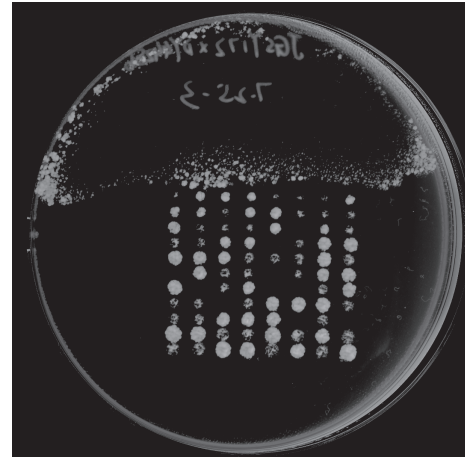

Supplement: fig9-figsupp3-data2 [file elife-81149-fig9-figsupp3-data2-v1.pdf]
