# Supplementary material for: The wtf meiotic driver gene family has unexpectedly persisted for over 100 million years
Source: eLife journal article supplement (doi:10.7554/elife.81149), 2022-09-21

*wtf46(SOCG\_00084)Δ/wtf46(SOCG\_00084)<sup>+</sup>* heterozygous diploid

## YEST plate

## G418 plate

DY47907 cross-1  
Successful octad: 11

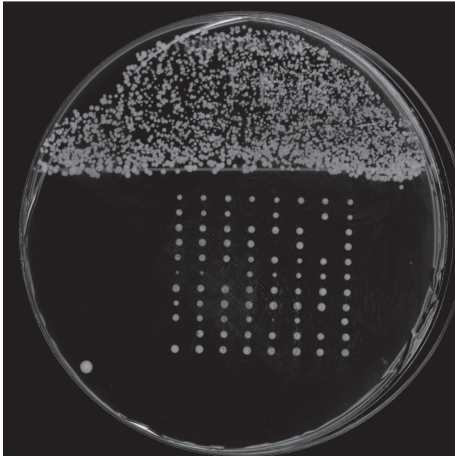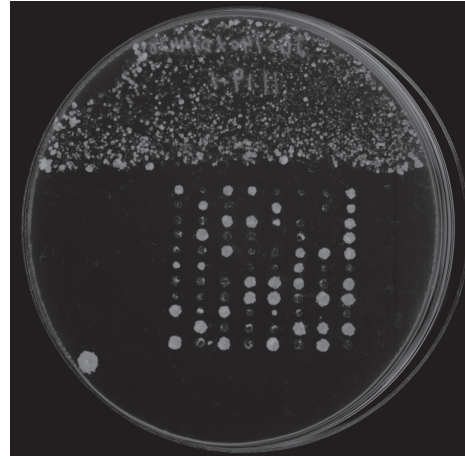

DY47907 cross-2  
Successful octad: 8

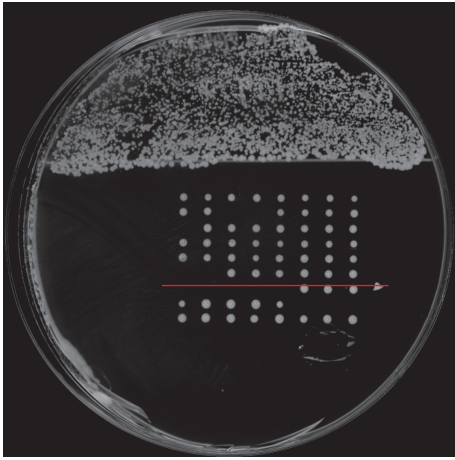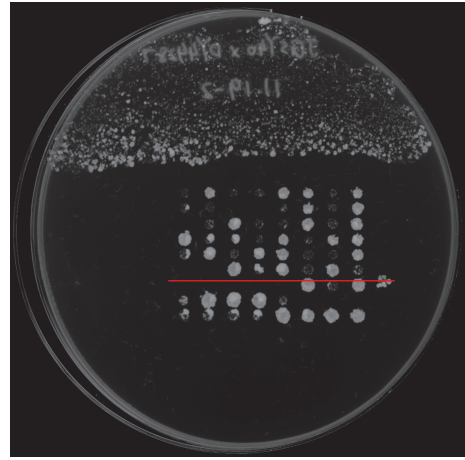

DY47907 cross-3  
Successful octad: 10

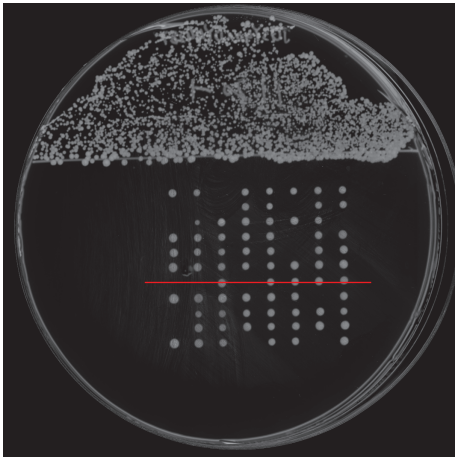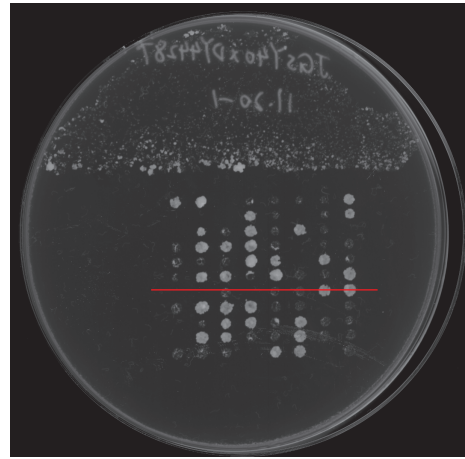

DY47907 cross-4  
Successful octad: 10

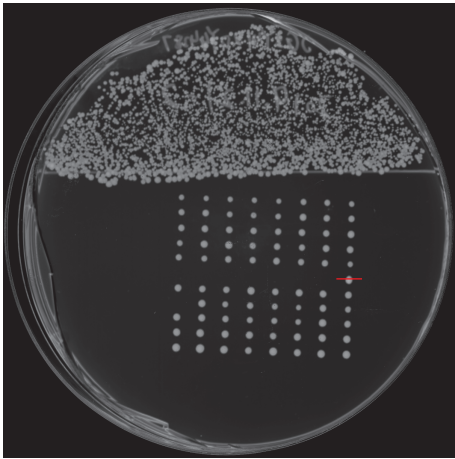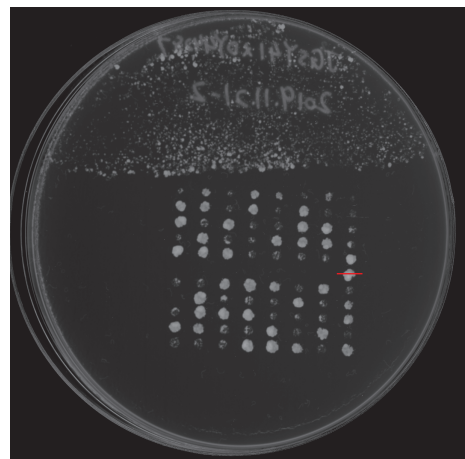

*wtf46(SOCG\_00084)Δ/wtf46(SOCG\_00084)<sup>+</sup>* heterozygous diploid

## YEST plate

## G418 plate

DY47907 cross-5  
Successful octad: 11

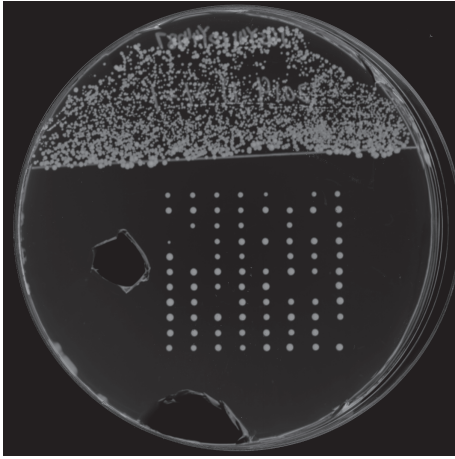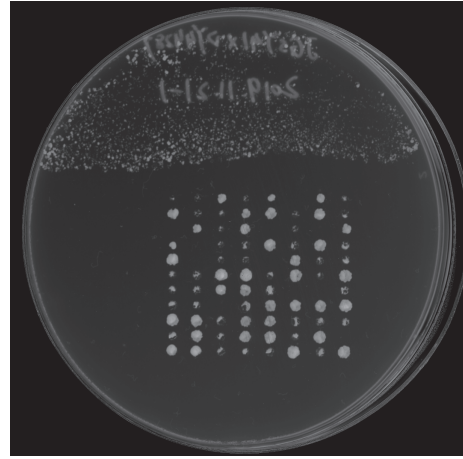

*wtf46(SOCG\_00084)Δ/wtf46(SOCG\_00084)<sup>+</sup>* heterozygous diploid

## YEST plate

## G418 plate

DY47908 cross-1  
Successful octad: 8

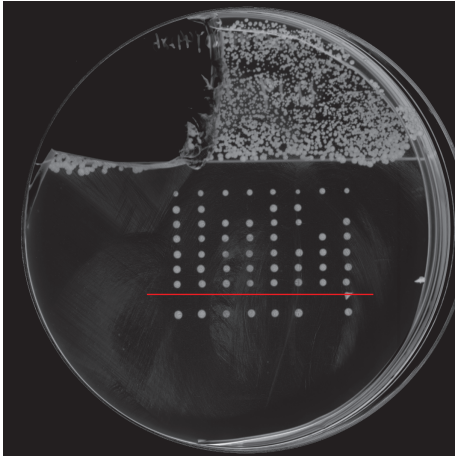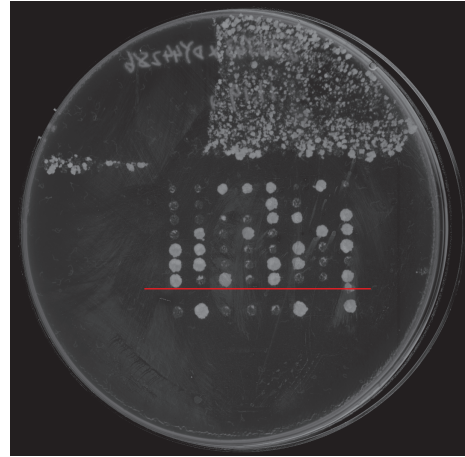

DY47908 cross-2  
Successful octad: 6

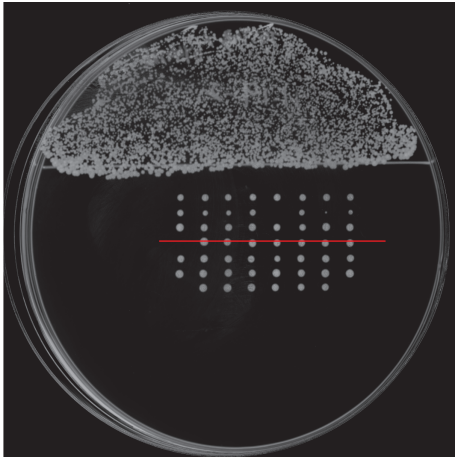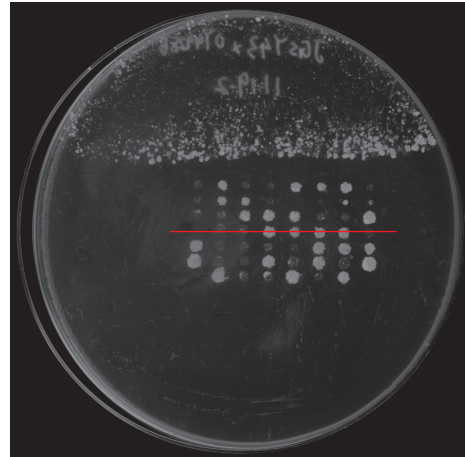

DY47908 cross-3  
Successful octad: 10

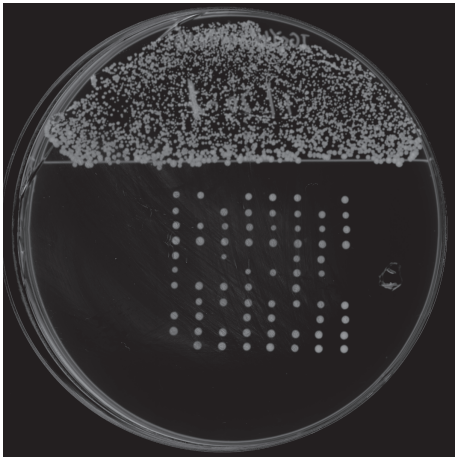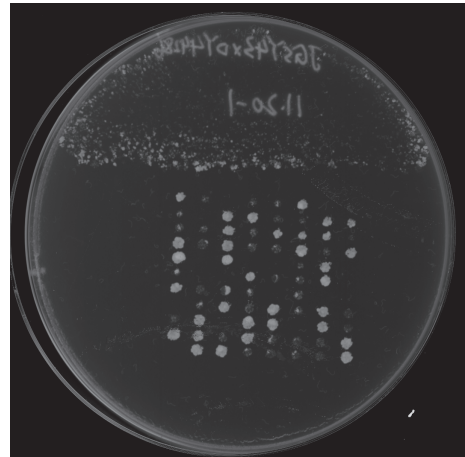

DY47908 cross-4  
Successful octad: 11

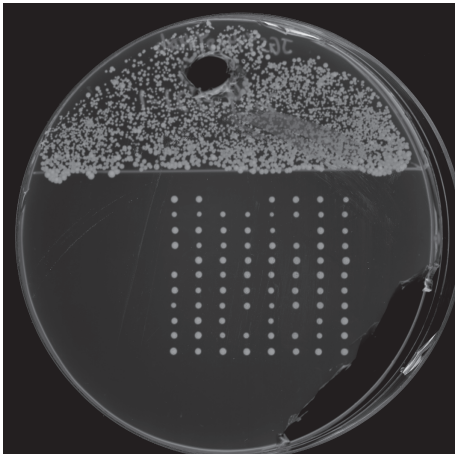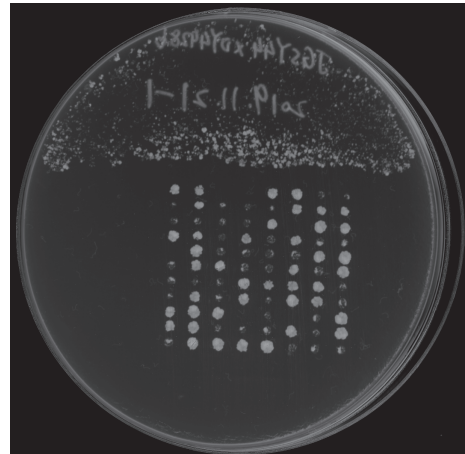

Supplement: fig9-figsupp4-data2 [file elife-81149-fig9-figsupp4-data2-v1.pdf]
