# Supplementary material for: The wtf meiotic driver gene family has unexpectedly persisted for over 100 million years
Source: eLife journal article supplement (doi:10.7554/elife.81149), 2022-09-21

*wtf21(SOCG\_02322)Δ/wtf21(SOCG\_02322)+* heterozygous diploid

## YEST plate

## G418 plate

DY47925 cross-1  
Successful octad: 10

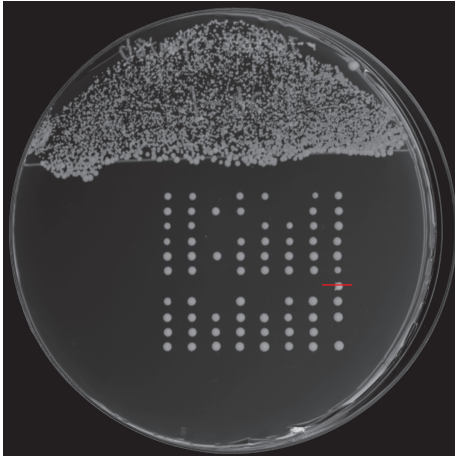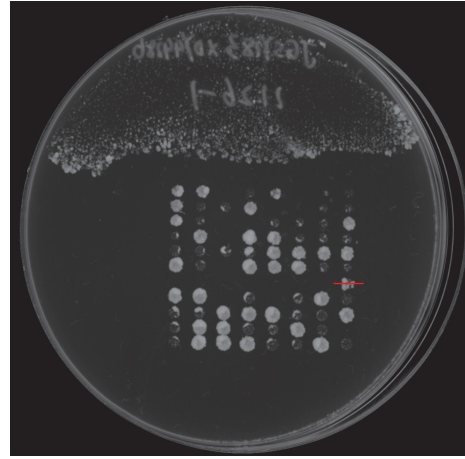

DY47925 cross-2  
Successful octad: 10

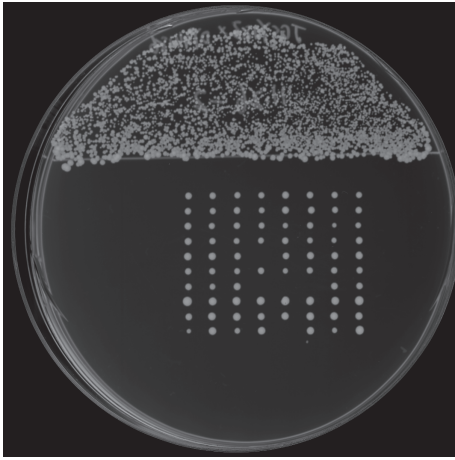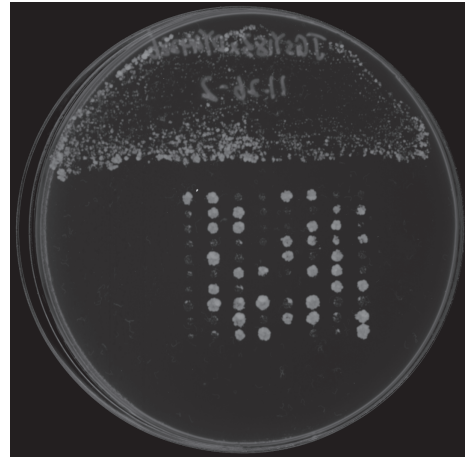

DY47925 cross-3  
Successful octad: 10

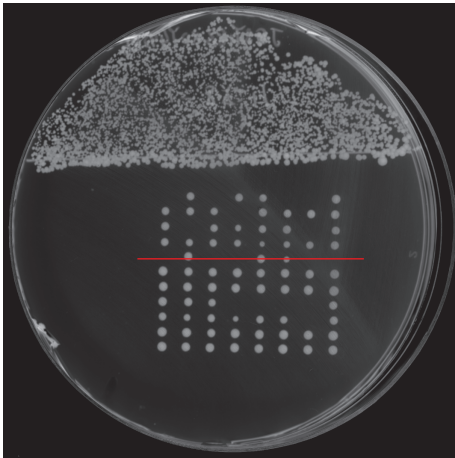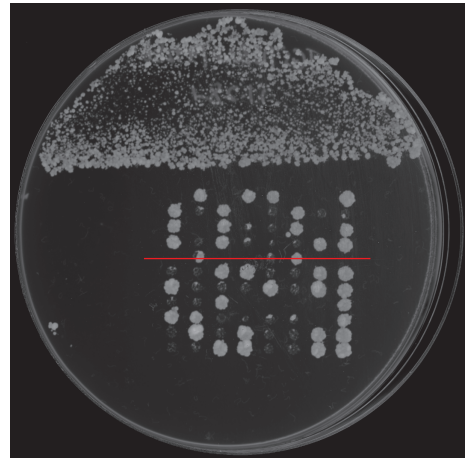

DY47925 cross-4  
Successful octad: 11

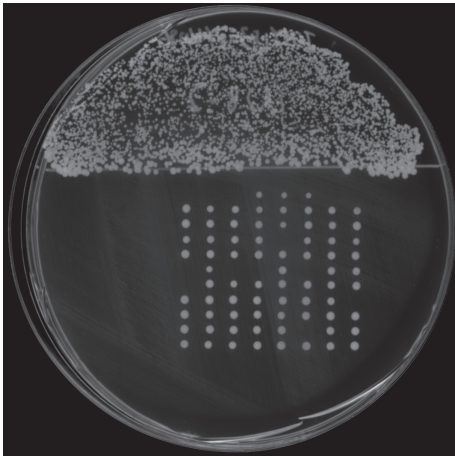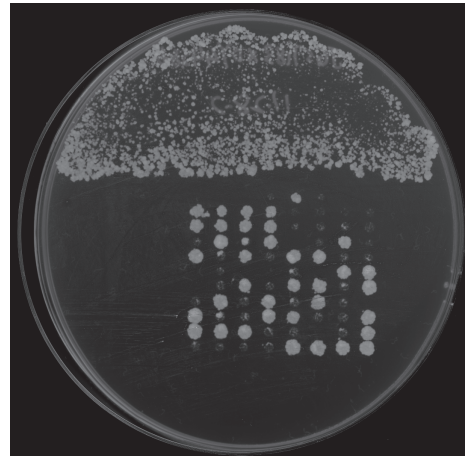

*wtf21(SOCG\_02322)Δ/wtf21(SOCG\_02322)+* heterozygous diploid

## YEST plate

## G418 plate

DY47925 cross-5  
Successful octad: 10

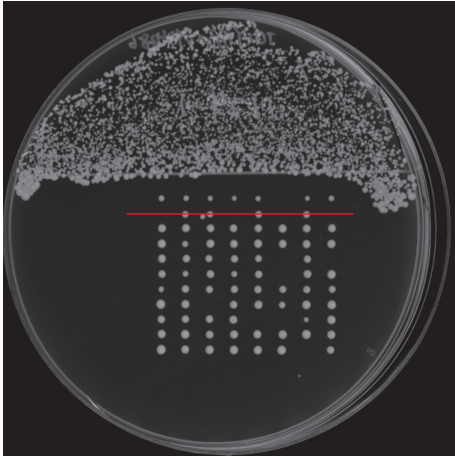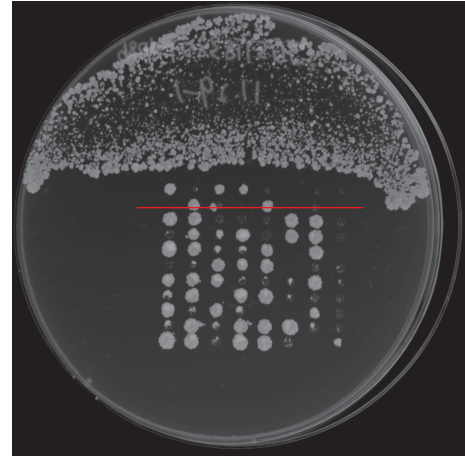

DY47925 cross-6  
Successful octad: 10

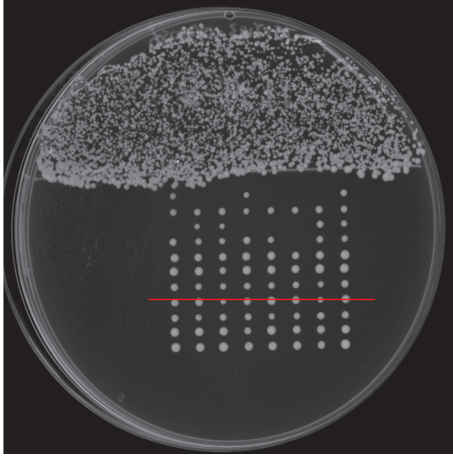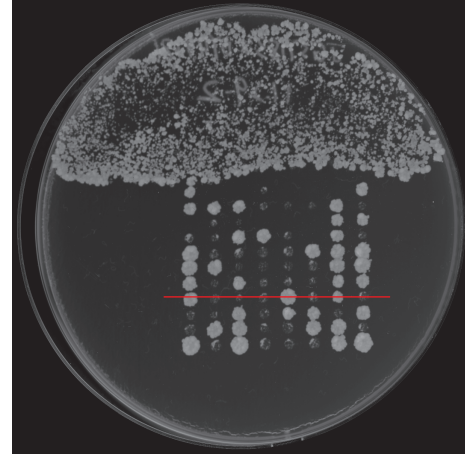

DY47925 cross-7  
Successful octad: 10

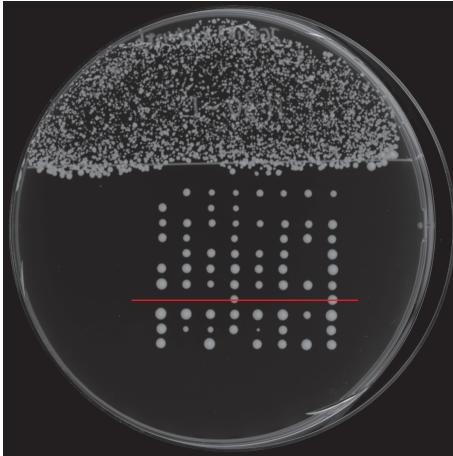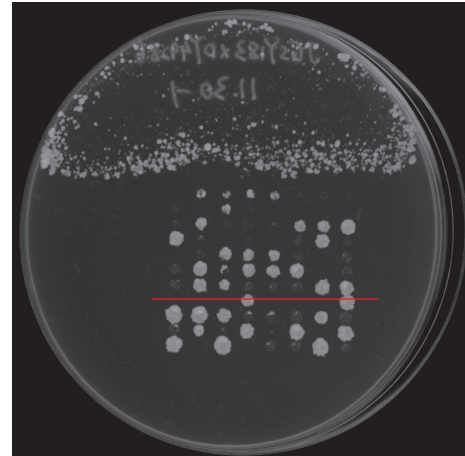

DY47925 cross-8  
Successful octad: 9

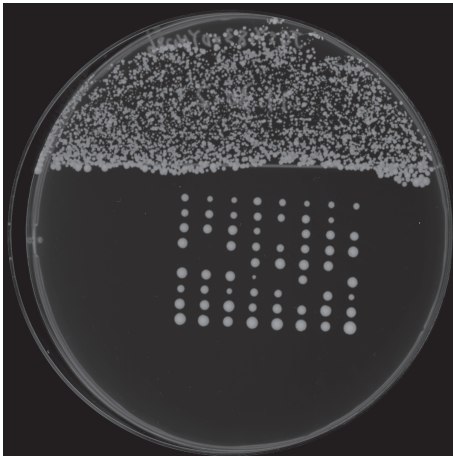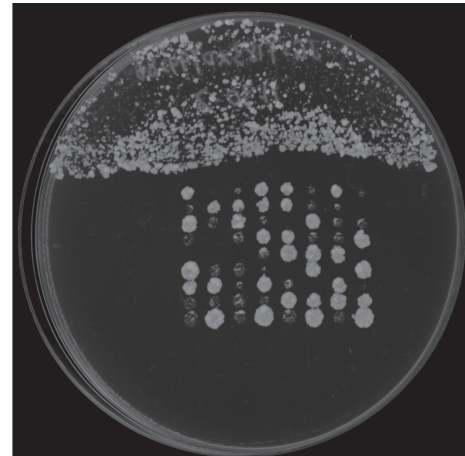

*wtf21(SOCG\_02322)Δ/wtf21(SOCG\_02322)+* heterozygous diploid

## YEST plate

## G418 plate

DY47926 cross-1  
Successful octad: 11

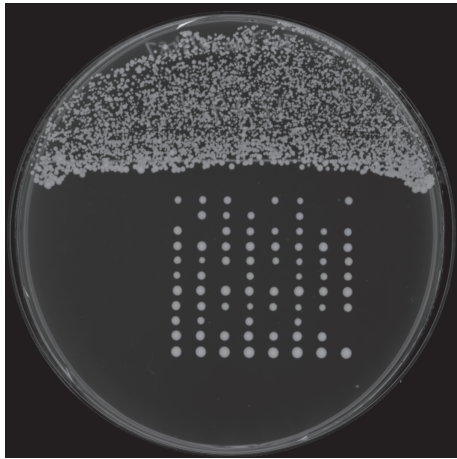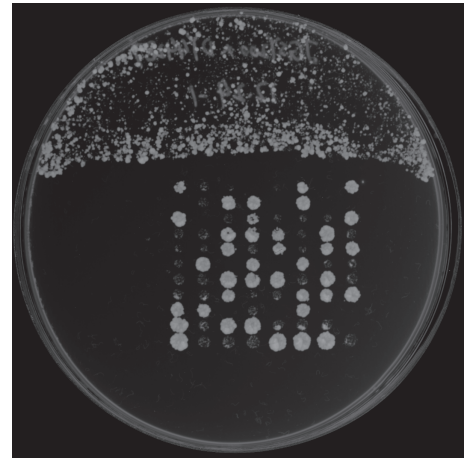

DY47926 cross-2  
Successful octad: 11

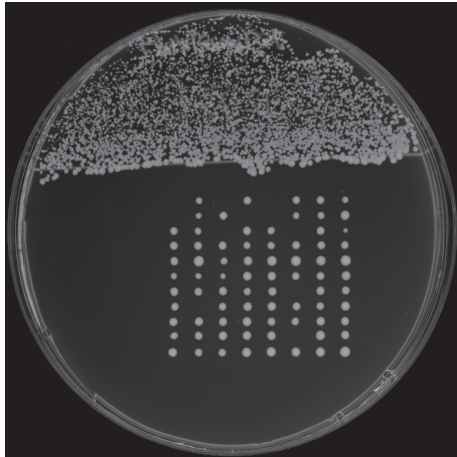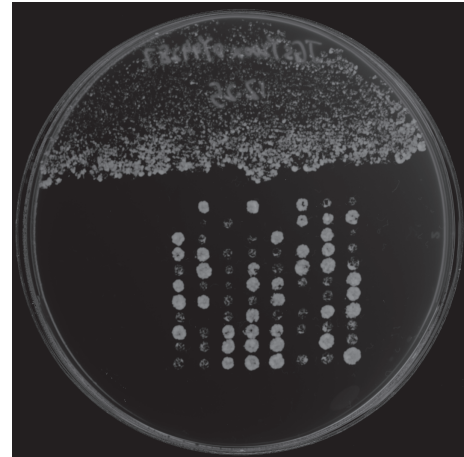

Supplement: fig9-figsupp5-data2 [file elife-81149-fig9-figsupp5-data2-v1.pdf]
