# Supplementary material for: The wtf meiotic driver gene family has unexpectedly persisted for over 100 million years
Source: eLife journal article supplement (doi:10.7554/elife.81149), 2022-09-21

*wtf62(SOCG\_04077)Δ/wtf62(SOCG\_04077)+* heterozygous diploid

## YEST plate

## G418 plate

DY47923 cross-1  
Successful octad: 9

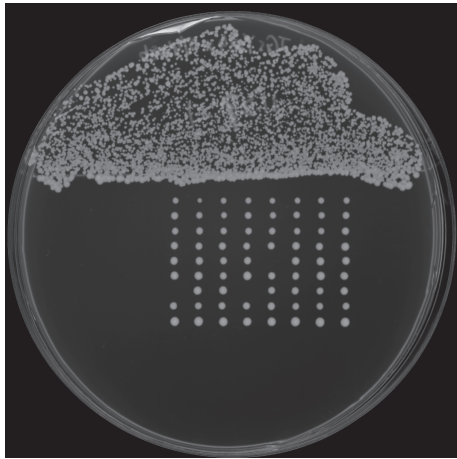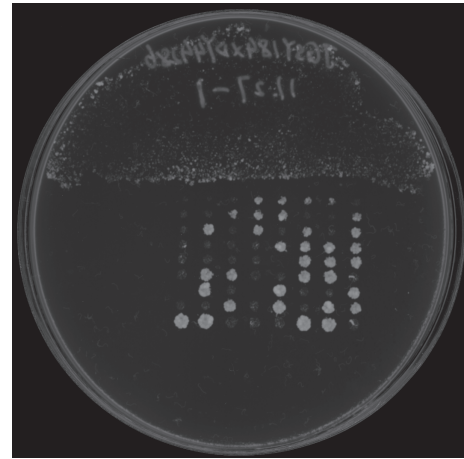

DY47923 cross-2  
Successful octad: 11

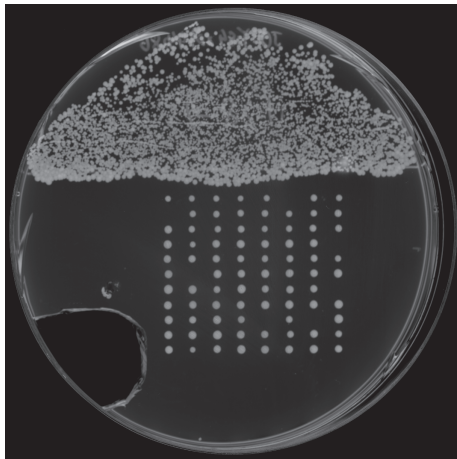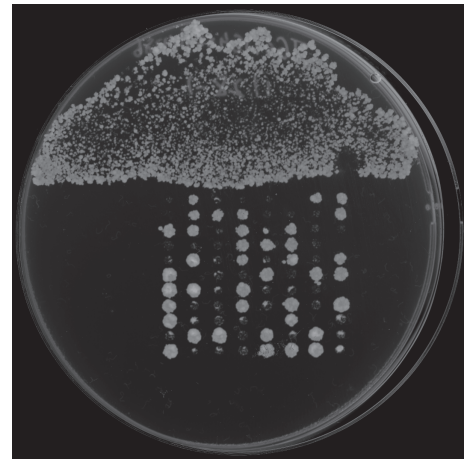

DY47923 cross-3  
Successful octad: 11

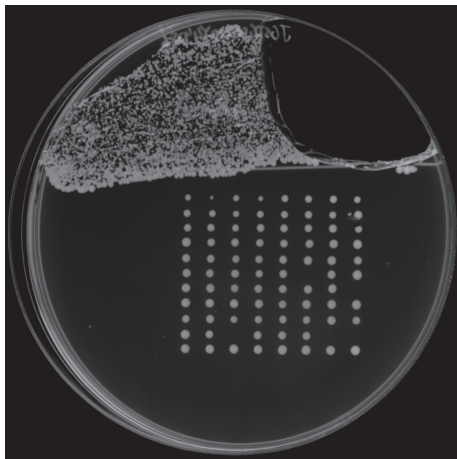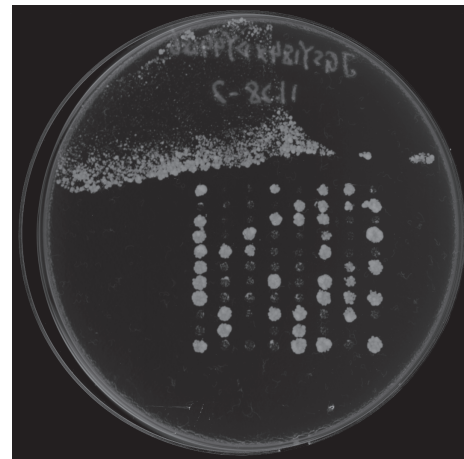

DY47923 cross-4  
Successful octad: 5

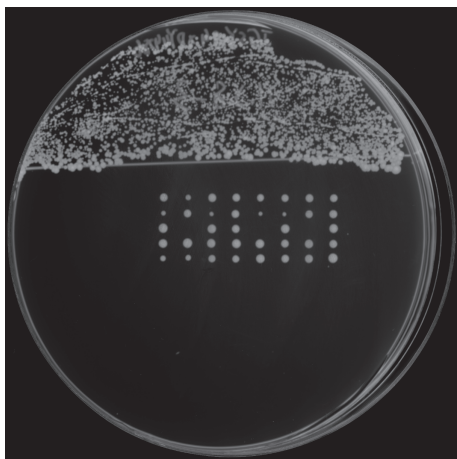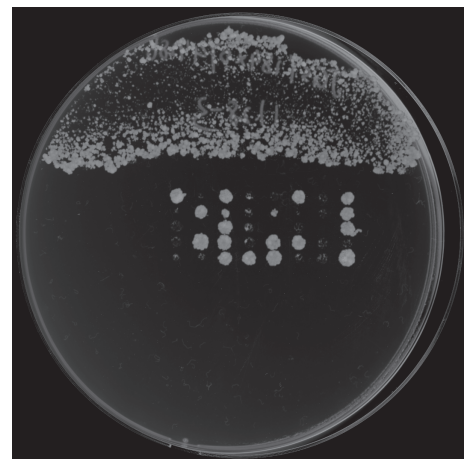

*wtf62(SOCG\_04077)Δ/wtf62(SOCG\_04077)+* heterozygous diploid

## YEST plate

## G418 plate

DY47923 cross-5  
Successful octad: 11

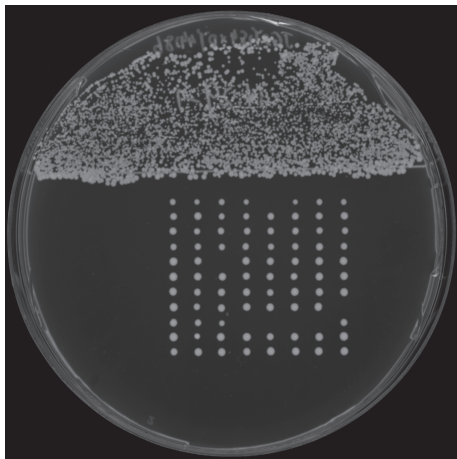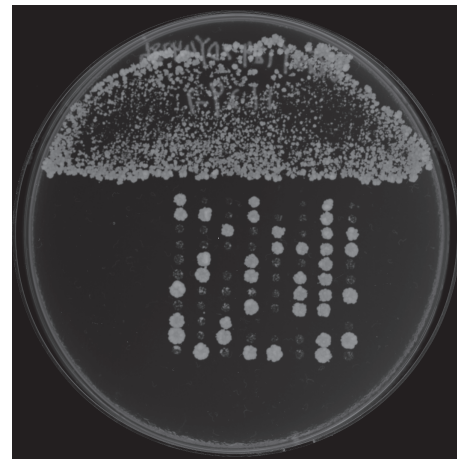

DY47923 cross-6  
Successful octad: 10

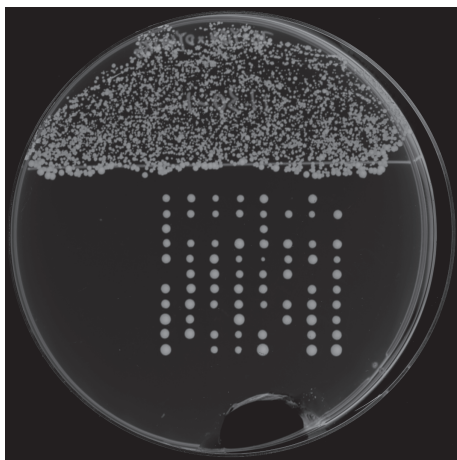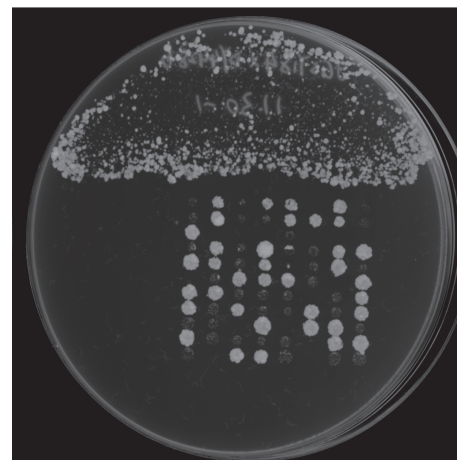

DY47923 cross-7  
Successful octad: 11

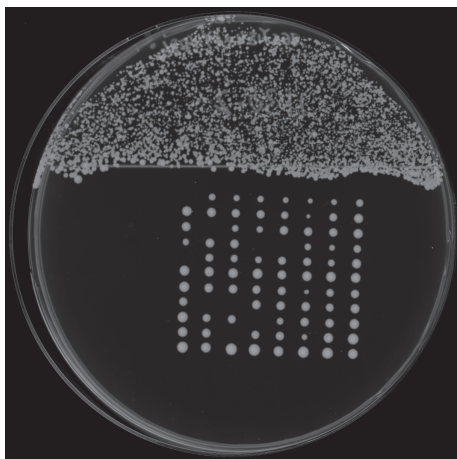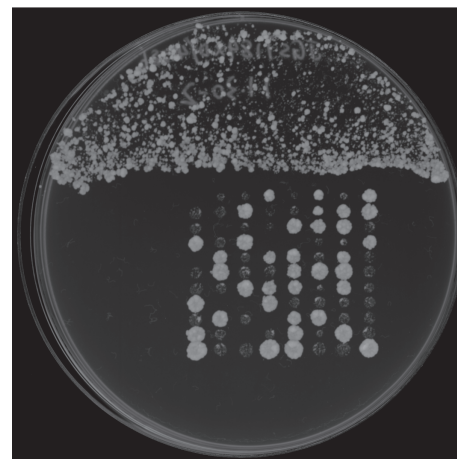

DY47923 cross-8  
Successful octad: 10

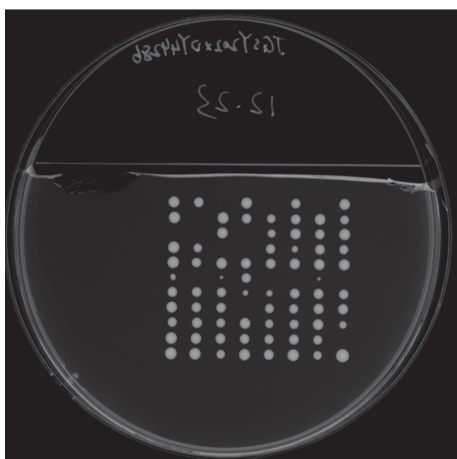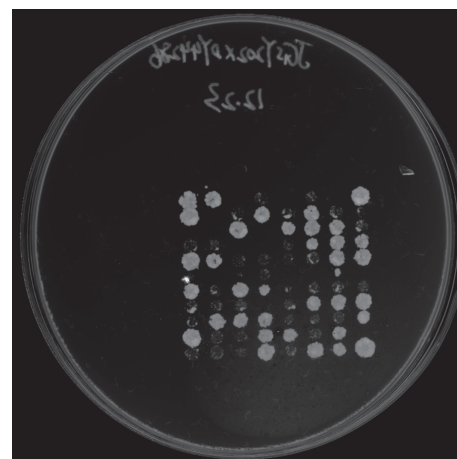

*wtf62(SOCG\_04077)Δ/wtf62(SOCG\_04077)+* heterozygous diploid

## YEST plate

## G418 plate

DY47924 cross-1  
Successful octad: 11

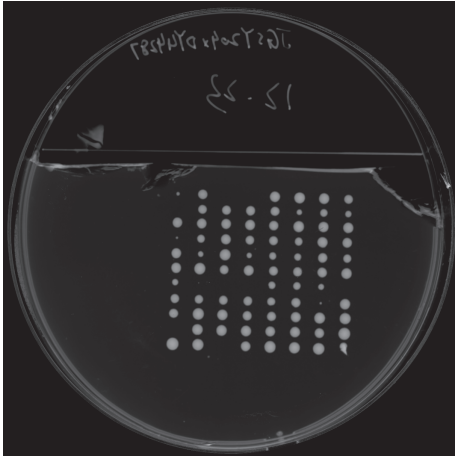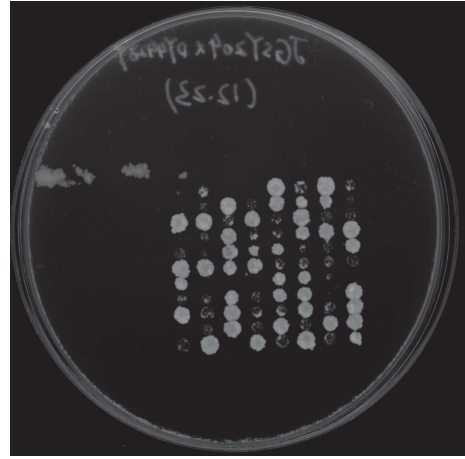

Supplement: fig9-figsupp6-data2 [file elife-81149-fig9-figsupp6-data2-v1.pdf]
