# Supplementary material for: The wtf meiotic driver gene family has unexpectedly persisted for over 100 million years
Source: eLife journal article supplement (doi:10.7554/elife.81149), 2022-09-21
Supplement: fig5-figsupp2-data2 [file elife-81149-fig5-figsupp2-data2-v1.pdf]

# GARD analysis of *S. osmophilus* wtf genes

\*\*\*

\*\*\*

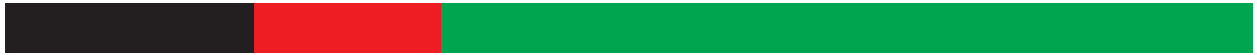

seg 1-158

seg 159-297

seg298-1044

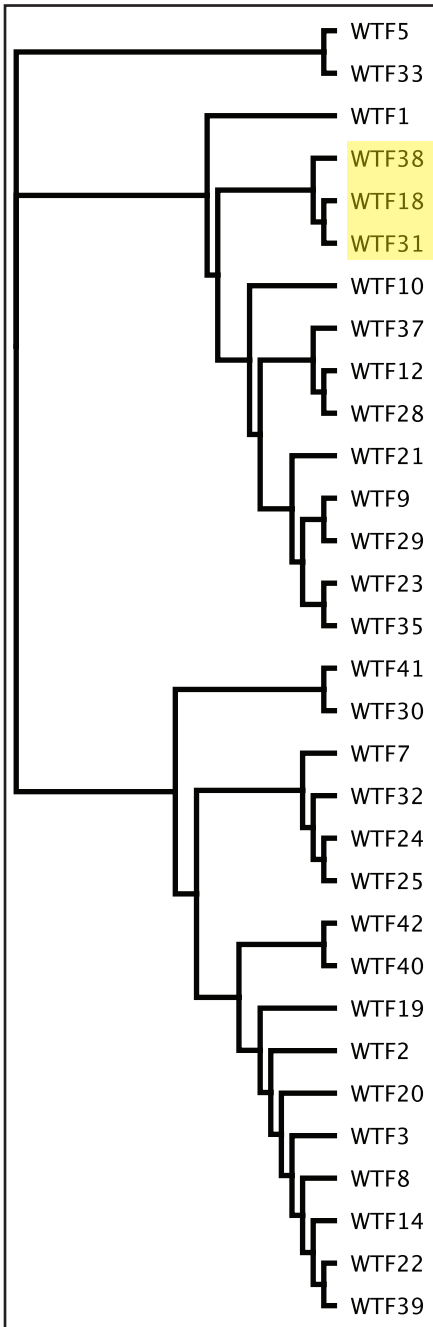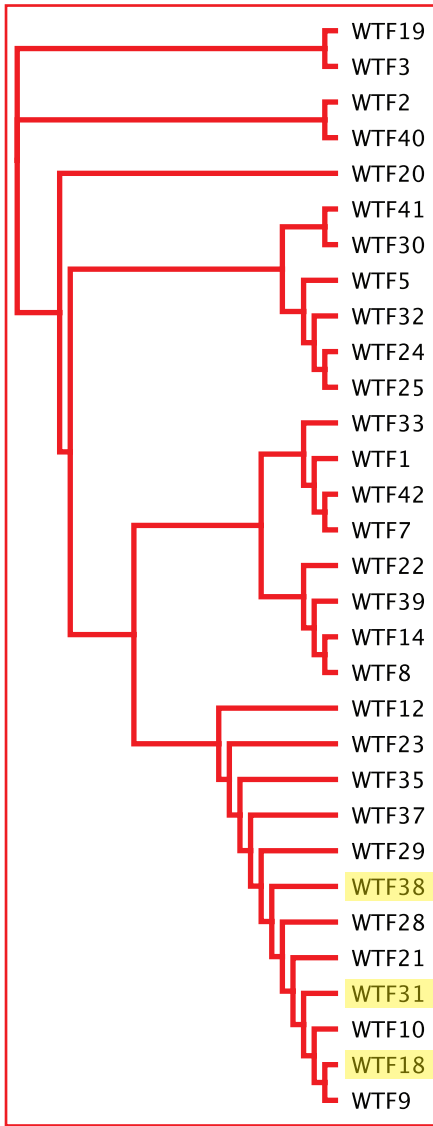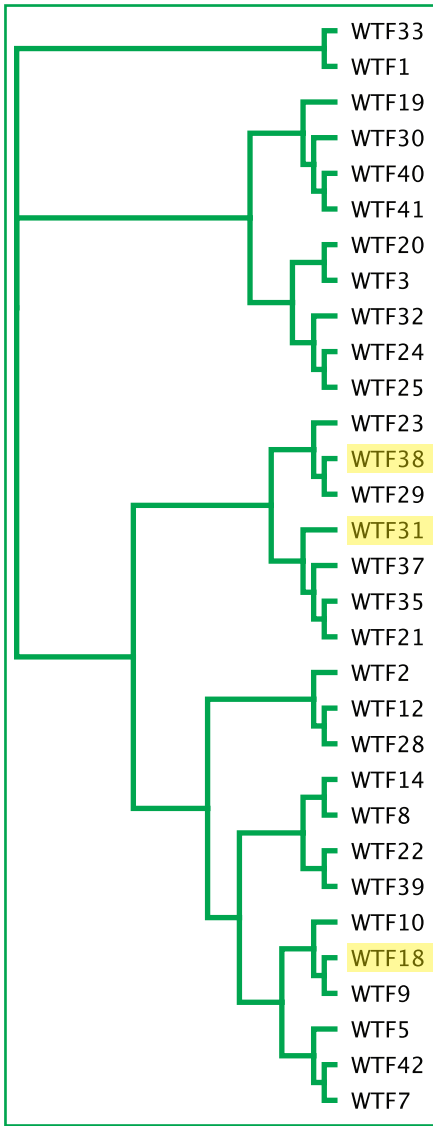

\*\*\* p-value= 0.0004
