# Supplementary material for: The wtf meiotic driver gene family has unexpectedly persisted for over 100 million years
Source: eLife journal article supplement (doi:10.7554/elife.81149), 2022-09-21
Supplement: fig9-figsupp1-data2 [file elife-81149-fig9-figsupp1-data2-v1.pdf]

*wtf68(SOCG\_01240)Δ/wtf68(SOCG\_01240)+* heterozygous diploid

## YEST plate

## G418 plate

DY47919 cross-1  
Successful octad: 11

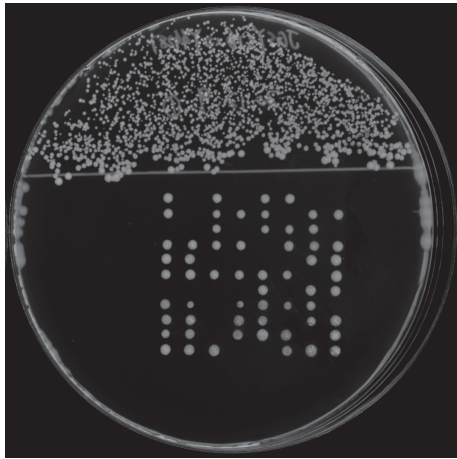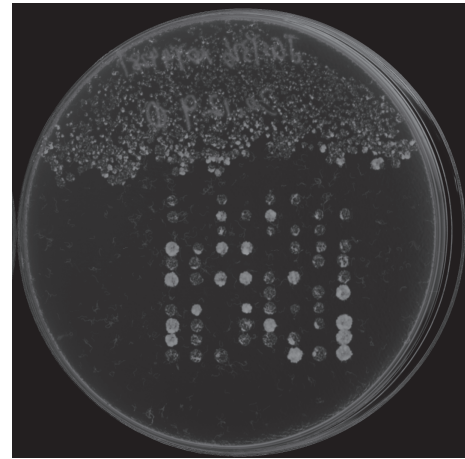

DY47919 cross-2  
Successful octad: 9

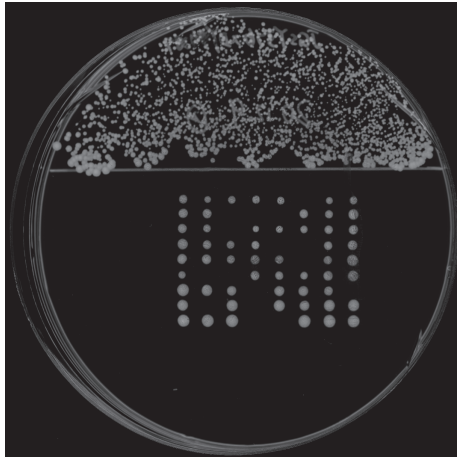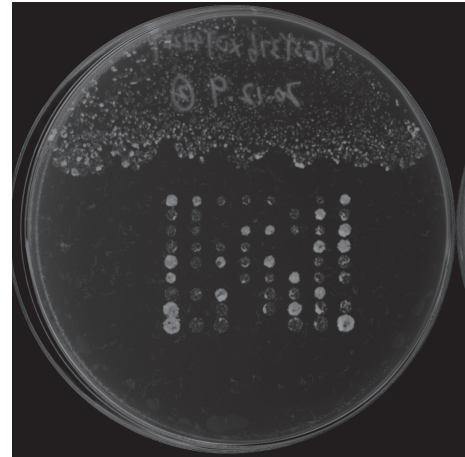

DY47919 cross-3  
Successful octad: 11

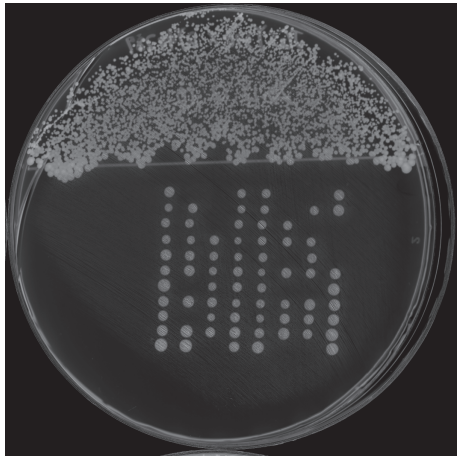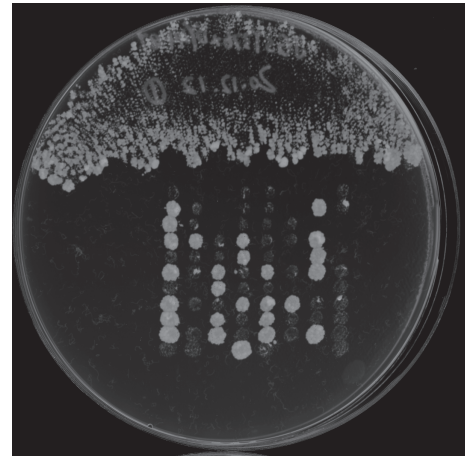

DY47919 cross-4  
Successful octad: 11

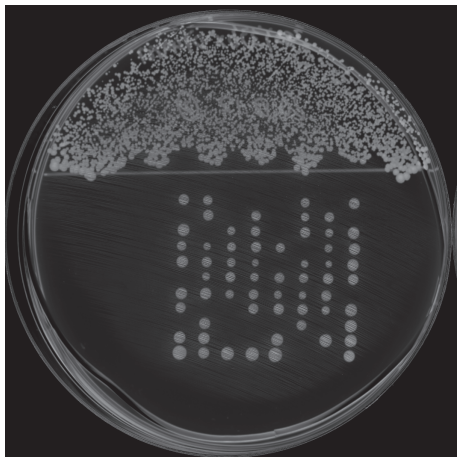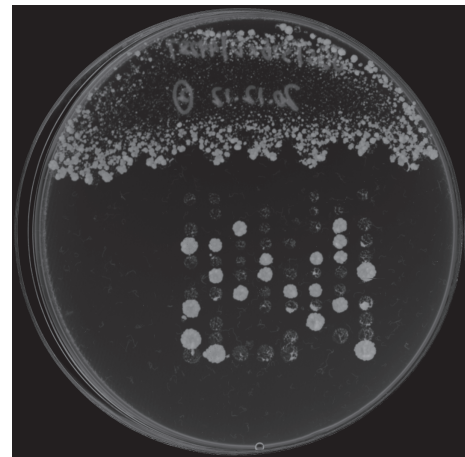

*wtf68(SOCG\_01240)Δ/wtf68(SOCG\_01240)<sup>+</sup>* heterozygous diploid

## YEST plate

## G418 plate

DY47919 cross-5  
Successful octad: 11

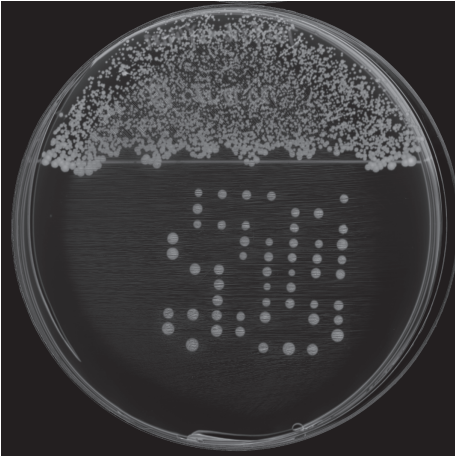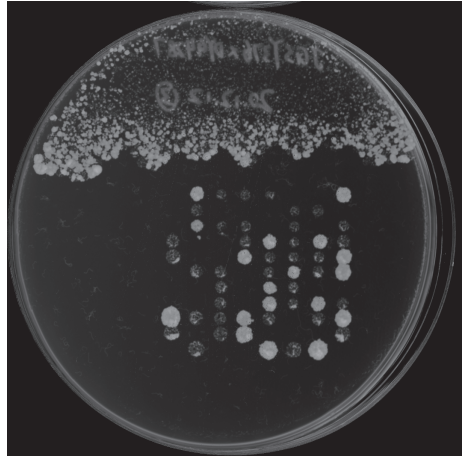

*wtf68(SOCG\_01240)Δ/wtf68(SOCG\_01240)+* heterozygous diploid

## YEST plate

## G418 plate

DY47920 cross-1  
Successful octad: 11

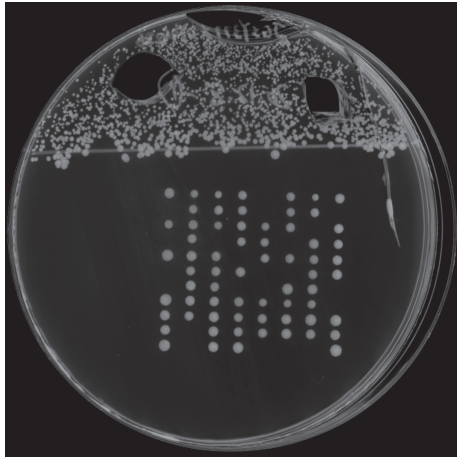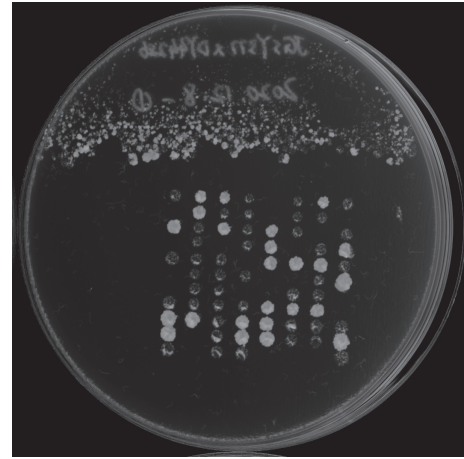

DY47920 cross-2  
Successful octad: 10

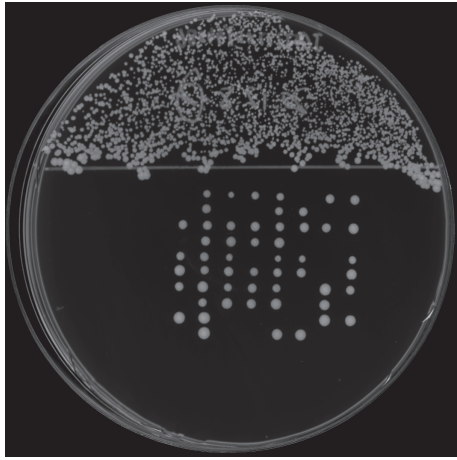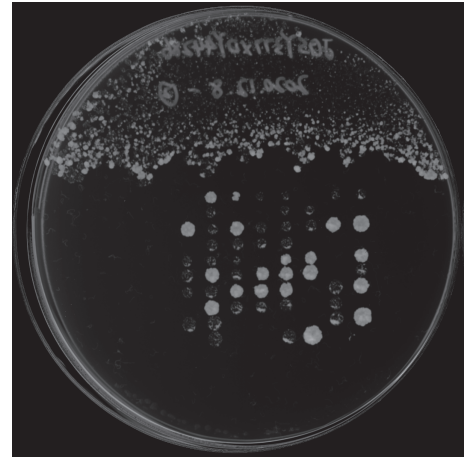

DY47920 cross-3  
Successful octad: 11

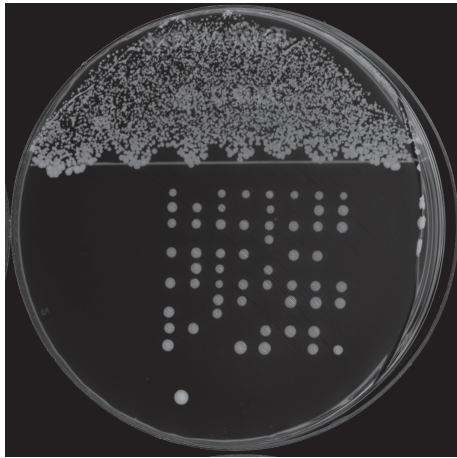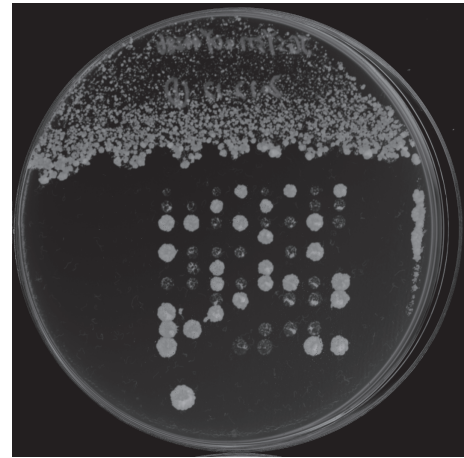

DY47920 cross-4  
Successful octad: 11

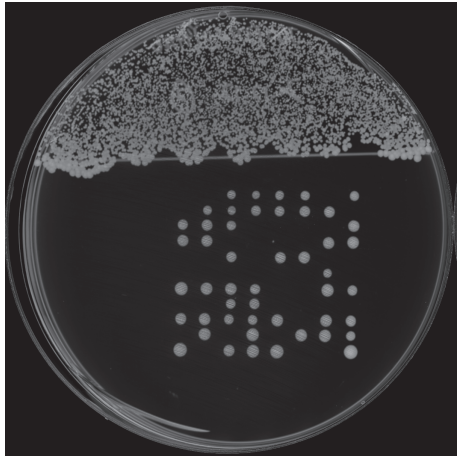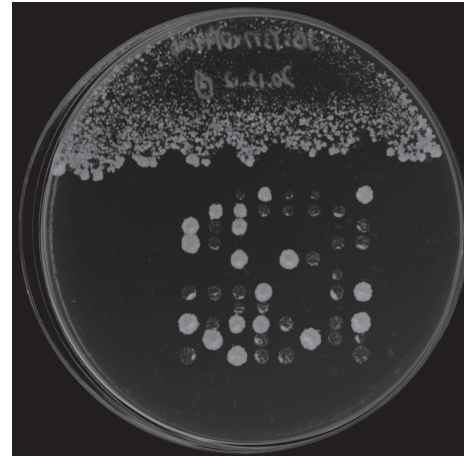

*wtf68(SOCG\_01240)Δ/wtf68(SOCG\_01240)<sup>+</sup>* heterozygous diploid

## YEST plate

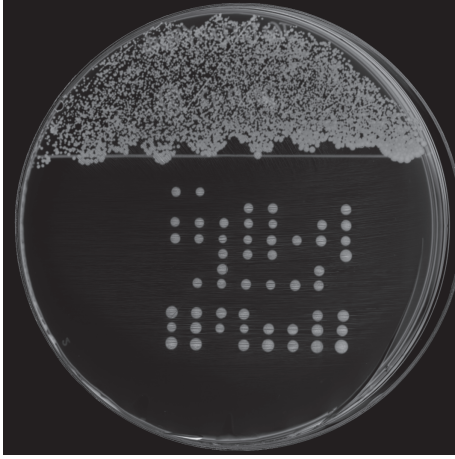

## G418 plate

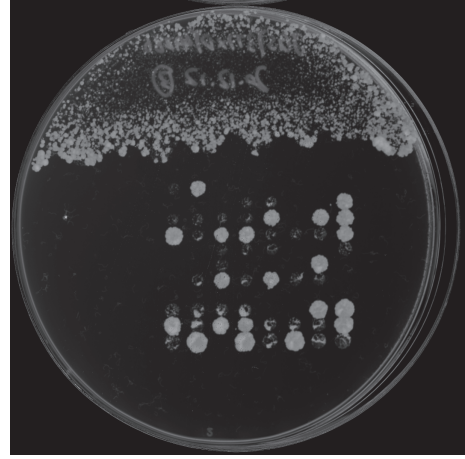

DY47920 cross-5  
Successful octad: 11
