# Supplementary material for: The wtf meiotic driver gene family has unexpectedly persisted for over 100 million years
Source: eLife journal article supplement (doi:10.7554/elife.81149), 2022-09-21

*wtf68(SOCG\_01240)Δ/wtf68(SOCG\_01240)Δ* homozygous diploid

## YEST plate

## G418 plate

DY47919 × DY47920 -1  
Successful octad: 11

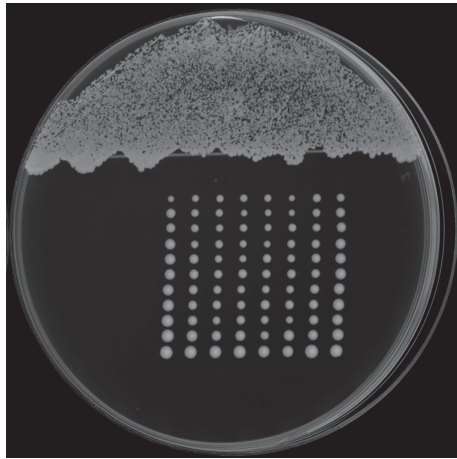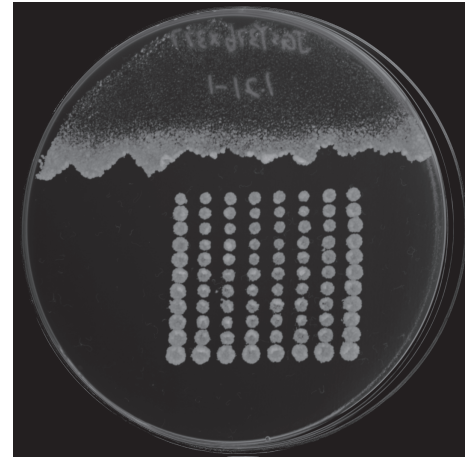

DY47919 × DY47920 -2  
Successful octad: 11

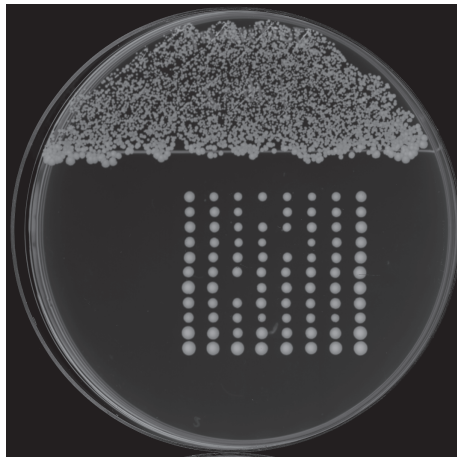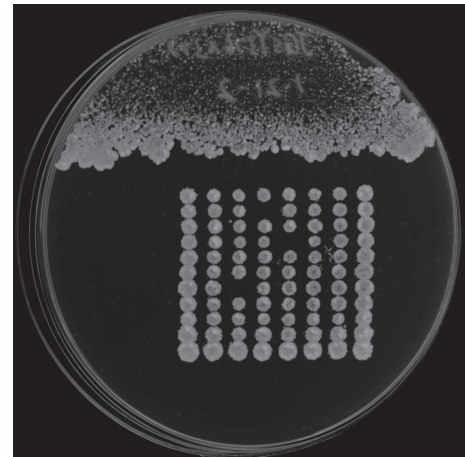

DY47919 × DY47920 -3  
Successful octad: 11

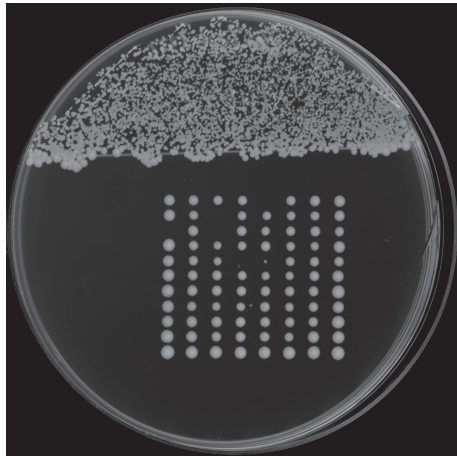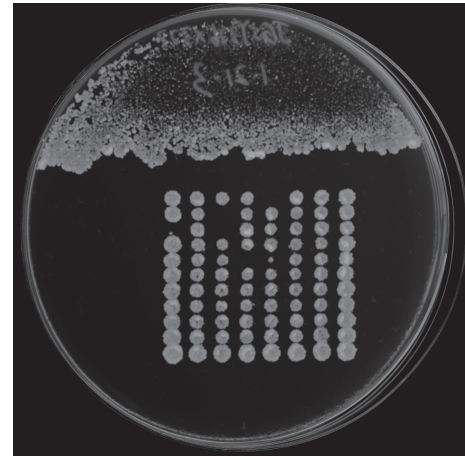

DY47919 × DY47920 -4  
Successful octad: 11

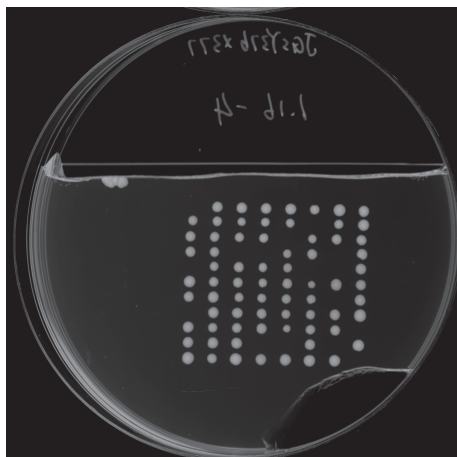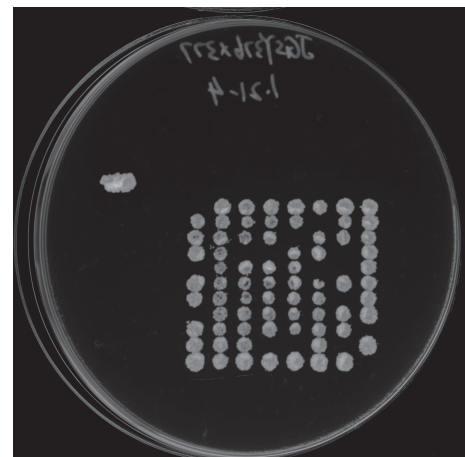

*wtf68(SOCG\_01240)Δ/wtf68(SOCG\_01240)Δ* homozygous diploid

## YEST plate

## G418 plate

DY47919 × DY47920 -5  
Successful octad: 11

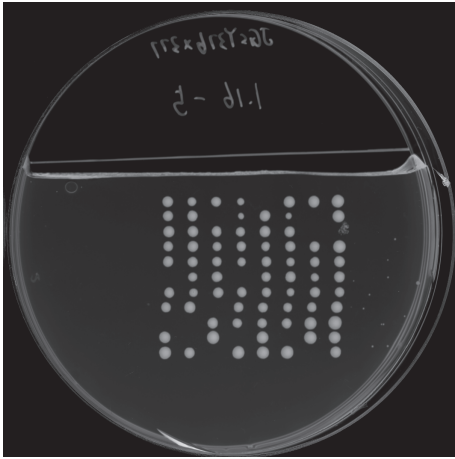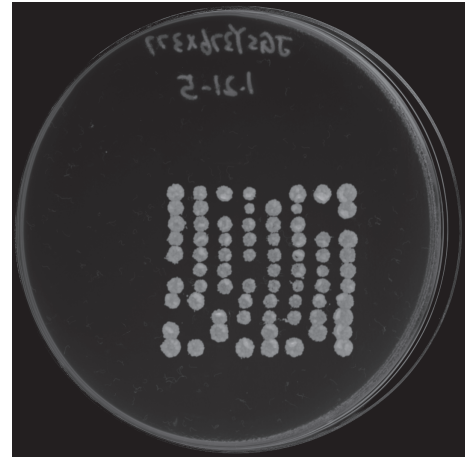

DY47919 × DY47920 -6  
Successful octad: 11

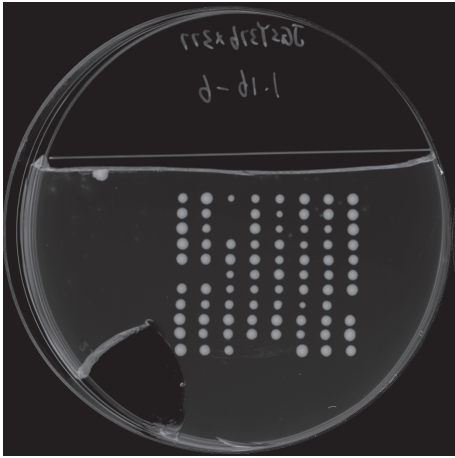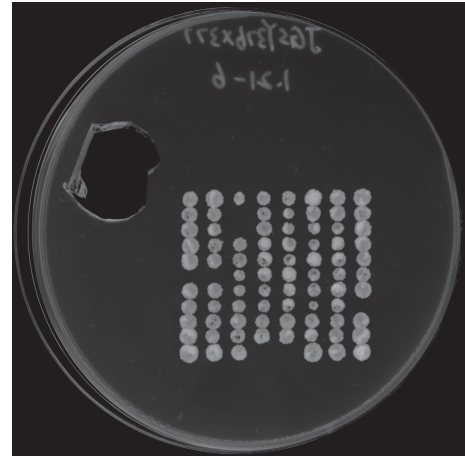

Supplement: fig9-figsupp1-data3 [file elife-81149-fig9-figsupp1-data3-v1.pdf]
