# Supplementary material for: The wtf meiotic driver gene family has unexpectedly persisted for over 100 million years
Source: eLife journal article supplement (doi:10.7554/elife.81149), 2022-09-21
Supplement: fig9-figsupp2-data2 [file elife-81149-fig9-figsupp2-data2-v1.pdf]

*wtf33Δ/wtf33<sup>+</sup>* heterozygous diploid

## YEST plate

## G418 plate

DY47903 cross-1  
Successful octad: 10

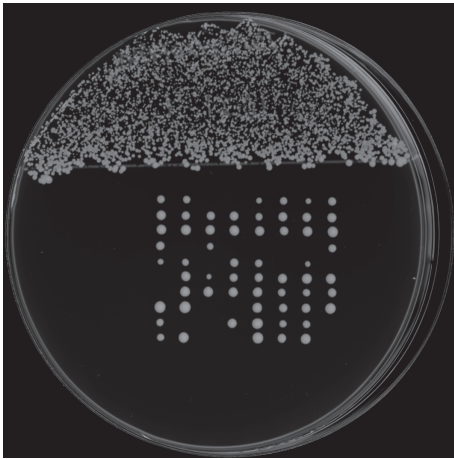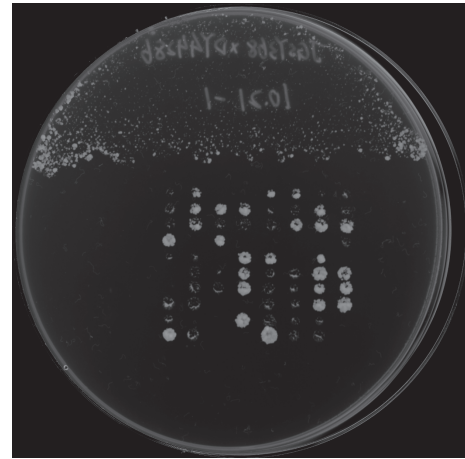

DY47903 cross-2  
Successful octad: 11

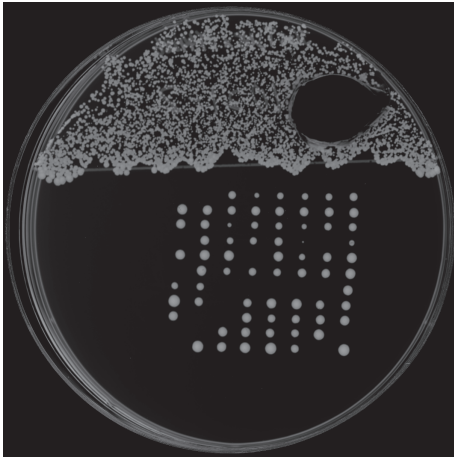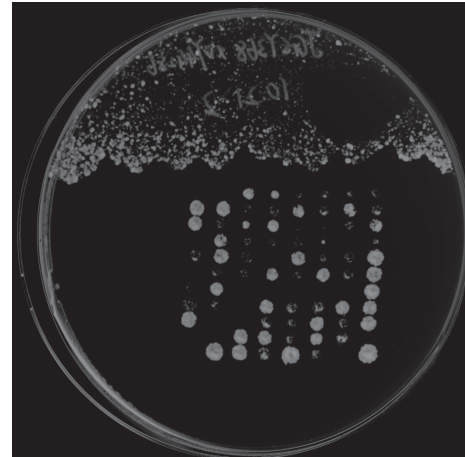

DY47903 cross-3  
Successful octad: 10

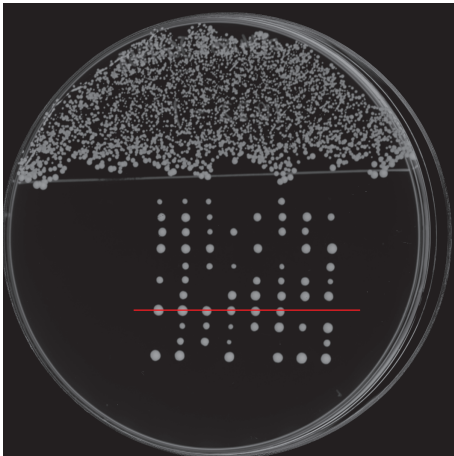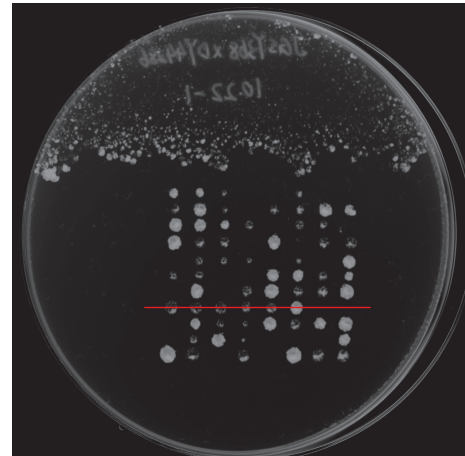

DY47903 cross-4  
Successful octad: 11

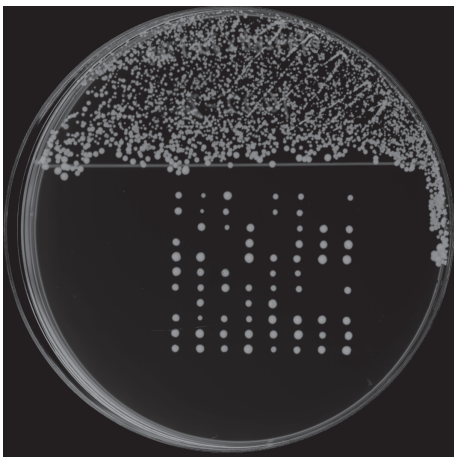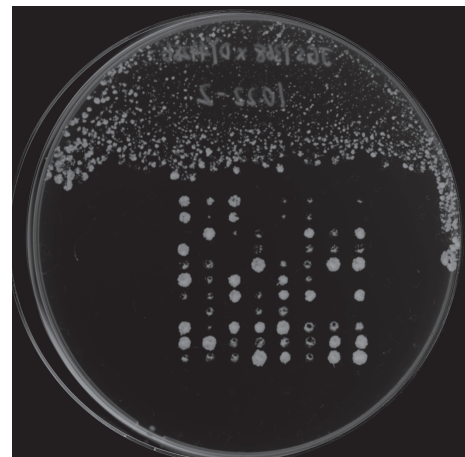

*wtf33Δ/wtf33<sup>+</sup>* heterozygous diploid

## YEST plate

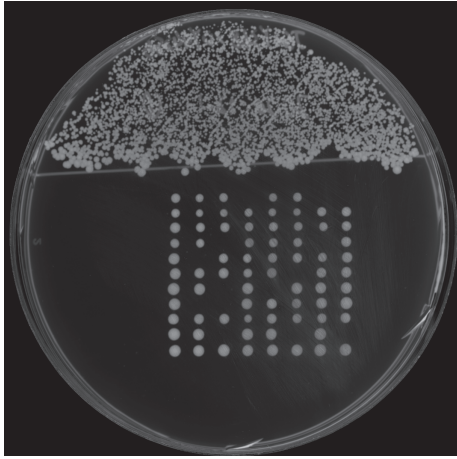

## G418 plate

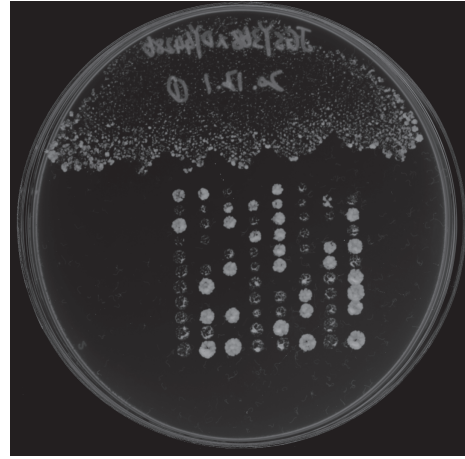

DY47903 cross-5

Successful octad: 11

*wtf33Δ/wtf33<sup>+</sup>* heterozygous diploid

## YEST plate

## G418 plate

DY47904 cross-1  
Successful octad: 11

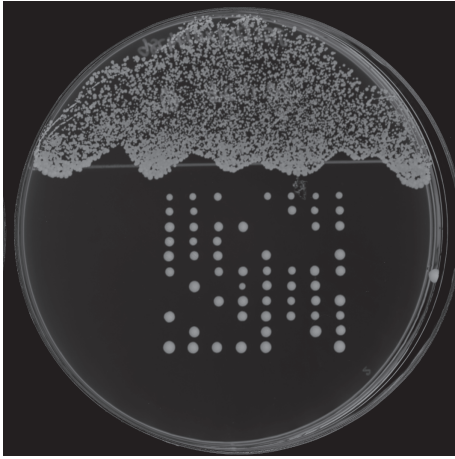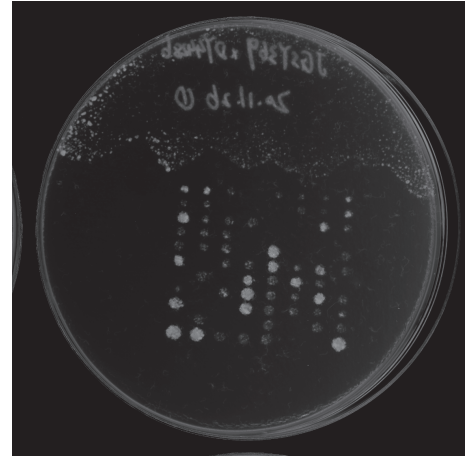

DY47904 cross-2  
Successful octad: 11

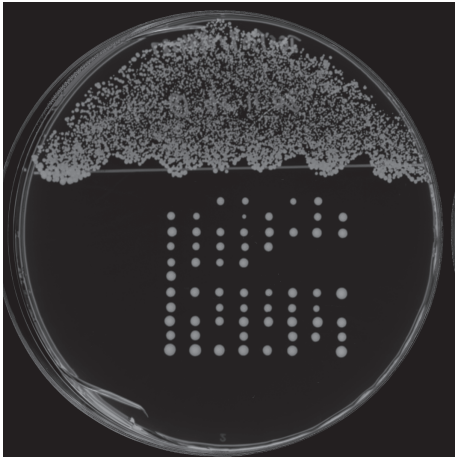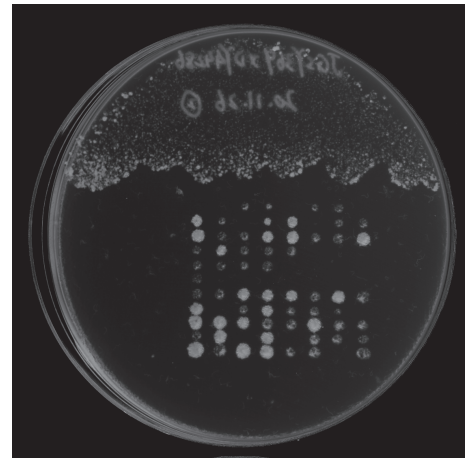

DY47904 cross-3  
Successful octad: 11

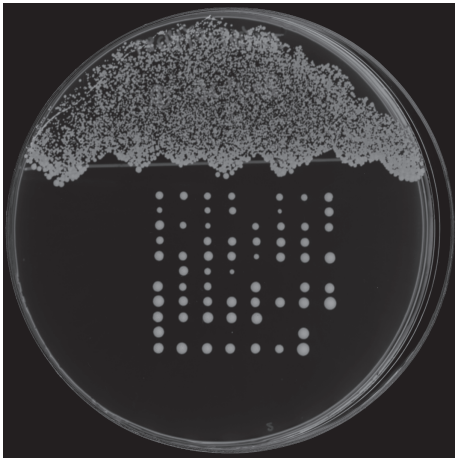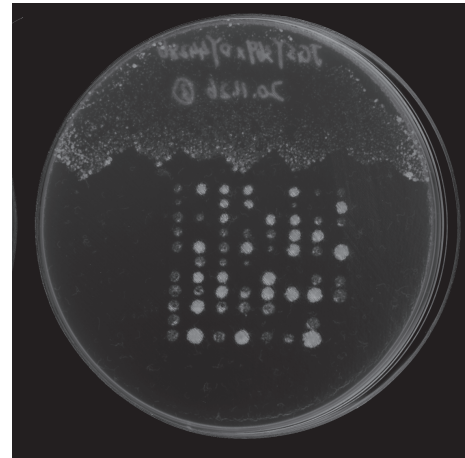

DY47904 cross-4  
Successful octad: 11

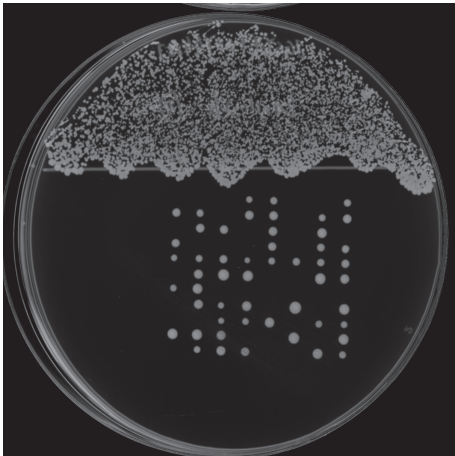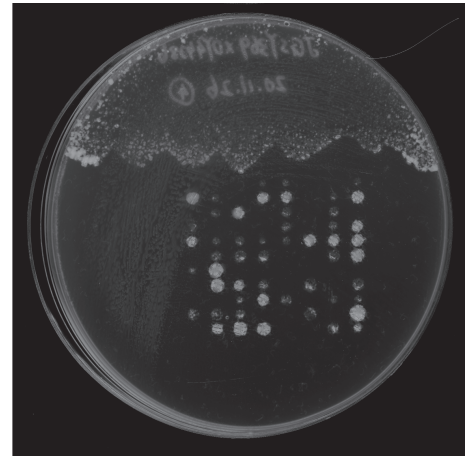

*wtf33Δ/wtf33<sup>+</sup>* heterozygous diploid

## YEST plate

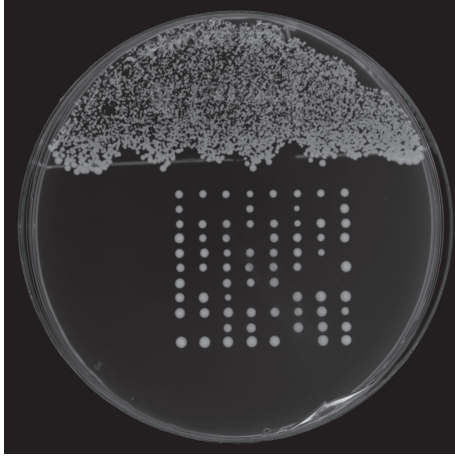

## G418 plate

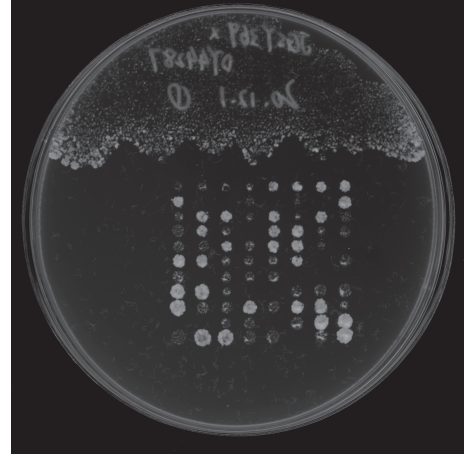

DY47904 cross-5

Successful octad: 11
