# Supplementary material for: The wtf meiotic driver gene family has unexpectedly persisted for over 100 million years
Source: eLife journal article supplement (doi:10.7554/elife.81149), 2022-09-21

*wtf33Δ/wtf33Δ* homozygous diploid

## YEST plate

## G418 plate

DY47903 × DY47904 -1  
Successful octad: 10

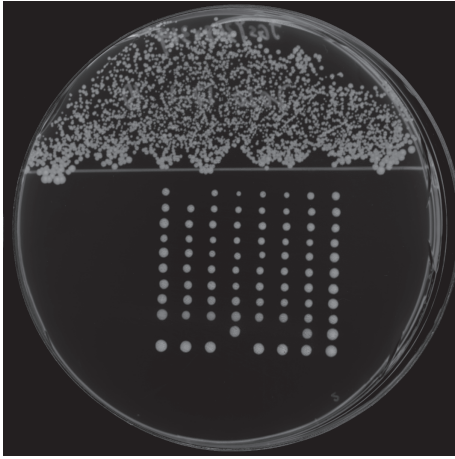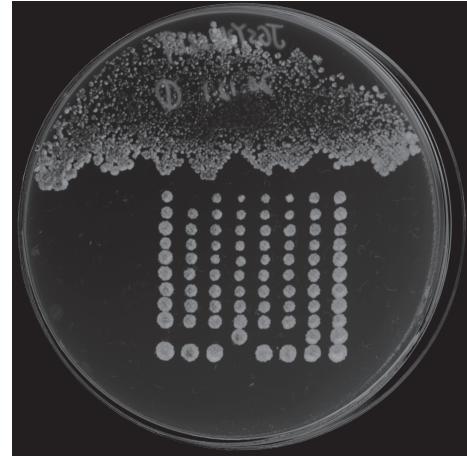

DY47903 × DY47904 -2  
Successful octad: 11

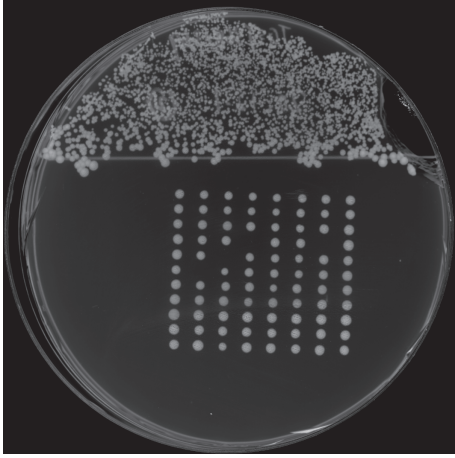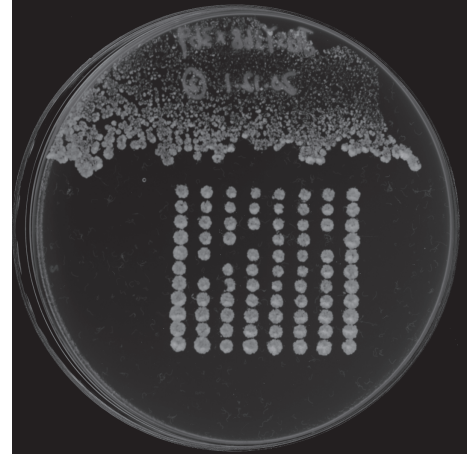

DY47903 × DY47904 -3  
Successful octad: 11

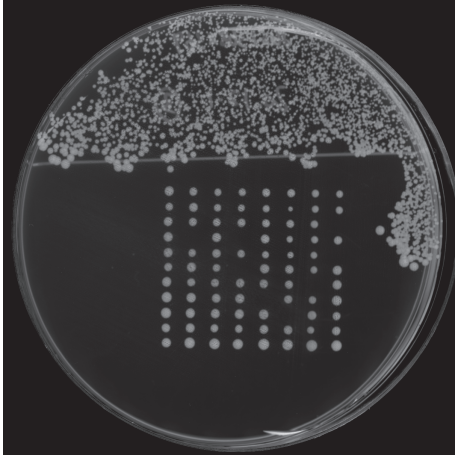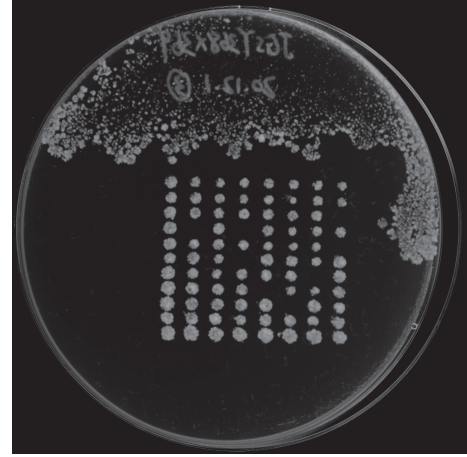

DY47903 × DY47904 -4  
Successful octad: 11

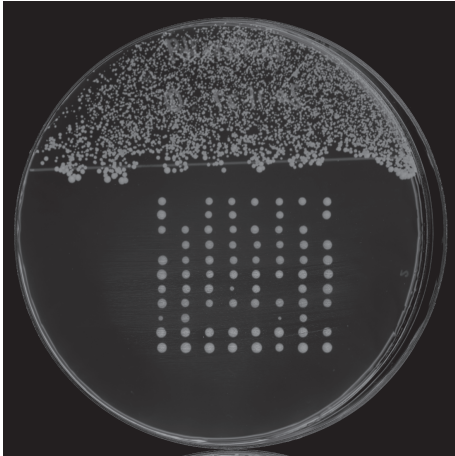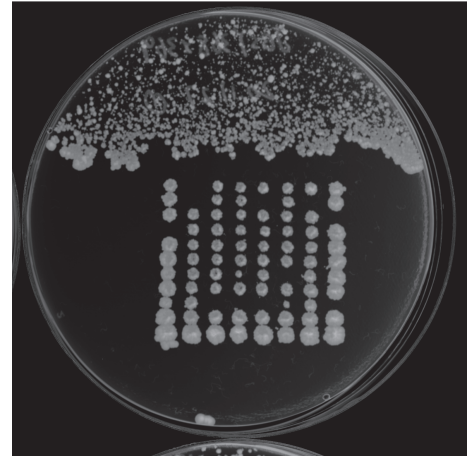

*wtf33Δ/wtf33Δ* homozygous diploid

## YEST plate

## G418 plate

DY47903 × DY47904 -5  
Successful octad: 11

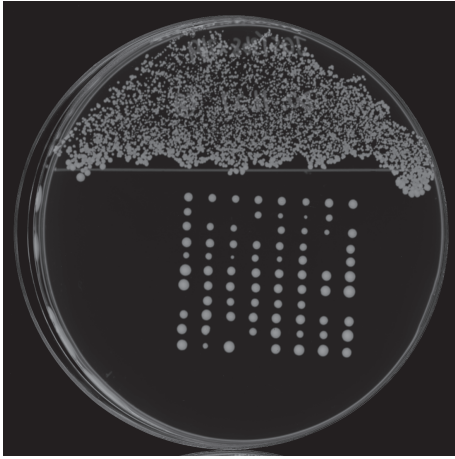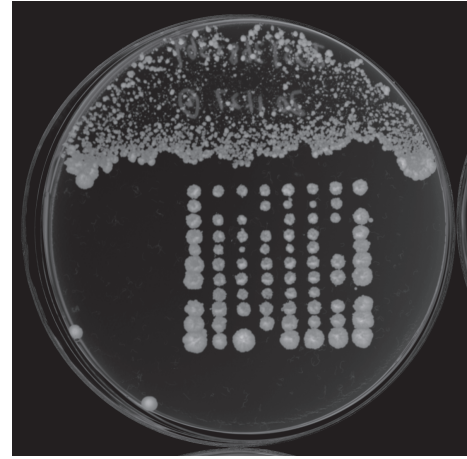

DY47903 × DY47904 -6  
Successful octad: 10

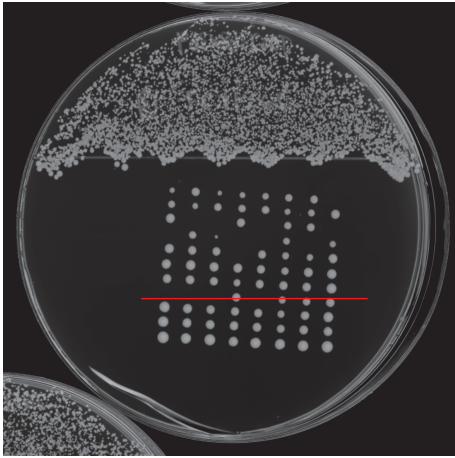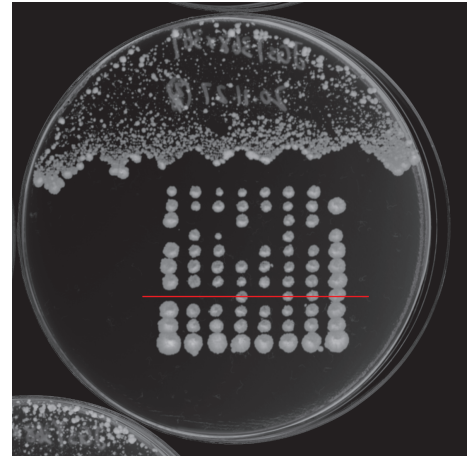

Supplement: fig9-figsupp2-data3 [file elife-81149-fig9-figsupp2-data3-v1.pdf]
