# Supplementary material for: The wtf meiotic driver gene family has unexpectedly persisted for over 100 million years
Source: eLife journal article supplement (doi:10.7554/elife.81149), 2022-09-21

*wtf46(SOCG\_00084)Δ/wtf46(SOCG\_00084)Δ* homozygous diploid

## YEST plate

## G418 plate

DY47907 × DY47908 -1  
Successful octad: 10

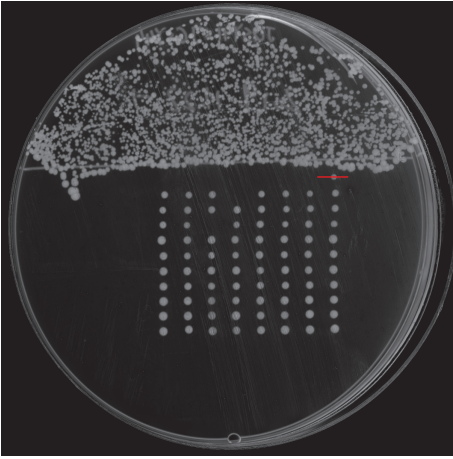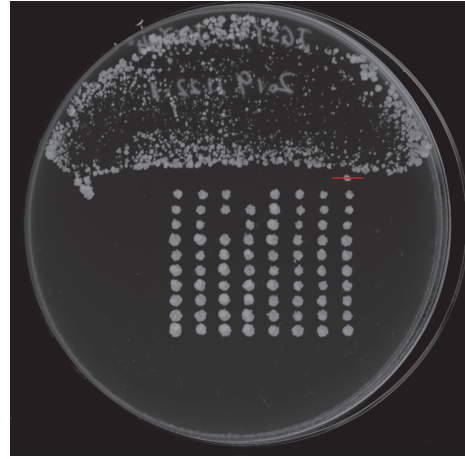

DY47907 × DY47908 -2  
Successful octad: 11

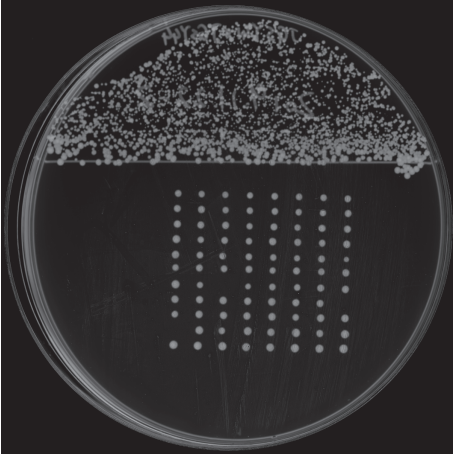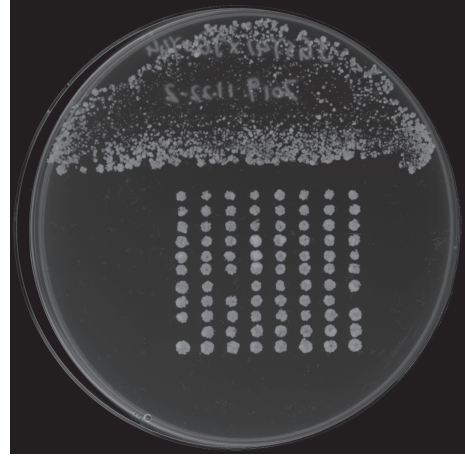

DY47907 × DY47908 -3  
Successful octad: 10

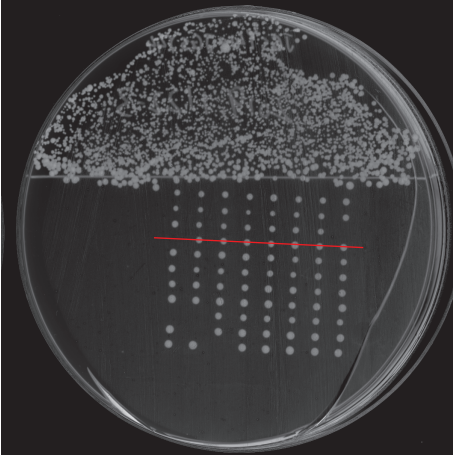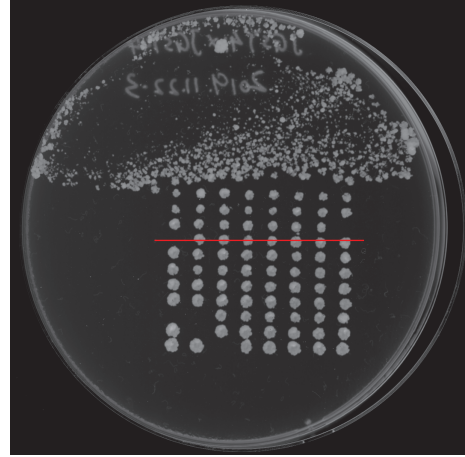

DY47907 × DY47908 -4  
Successful octad: 5

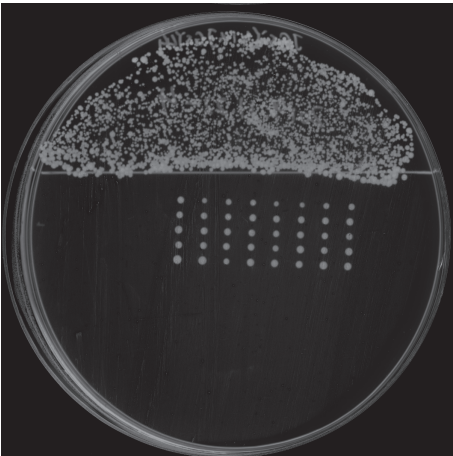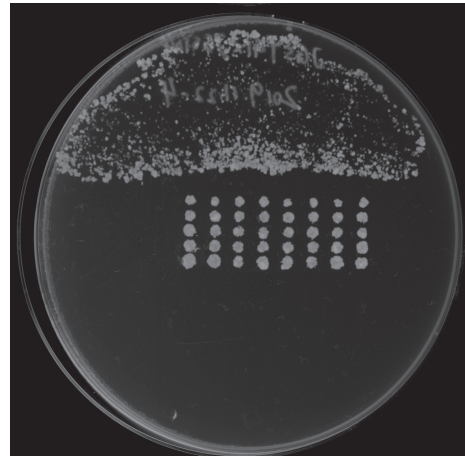

*wtf46(SOCG\_00084)Δ/wtf46(SOCG\_00084)Δ* homozygous diploid

## YEST plate

## G418 plate

DY47907 × DY47908 -1  
Successful octad: 11

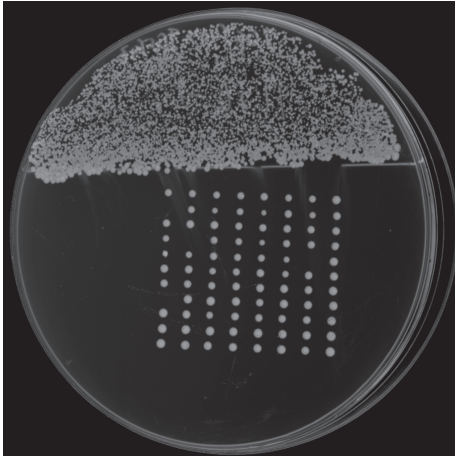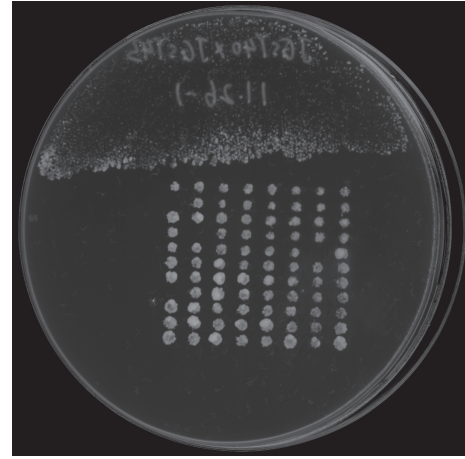

DY47907 × DY47908 -2  
Successful octad: 11

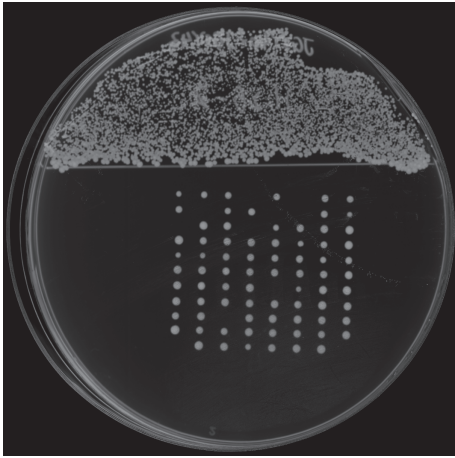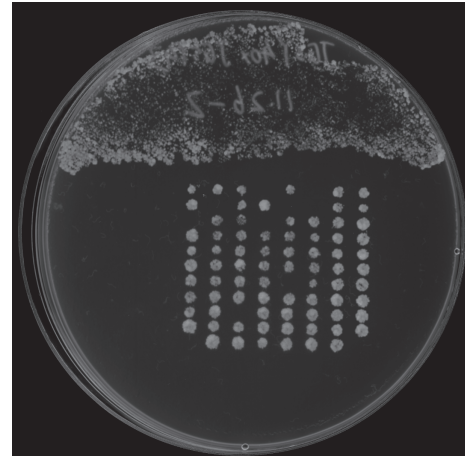

Supplement: fig9-figsupp4-data3 [file elife-81149-fig9-figsupp4-data3-v1.pdf]
