# Supplementary material for: The wtf meiotic driver gene family has unexpectedly persisted for over 100 million years
Source: eLife journal article supplement (doi:10.7554/elife.81149), 2022-09-21

*wtf21(SOCG\_02322)Δ/wtf21(SOCG\_02322)Δ* homozygous diploid

## YEST plate

## G418 plate

DY47925 × DY47926 -1  
Successful octad: 11

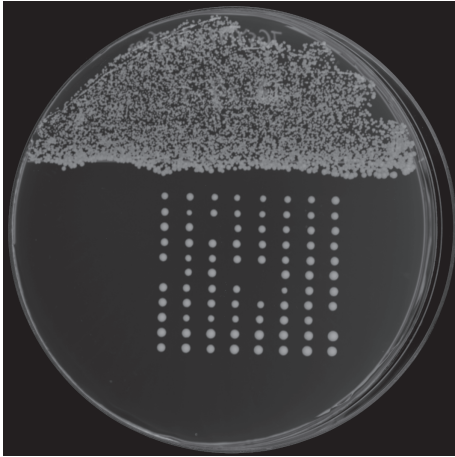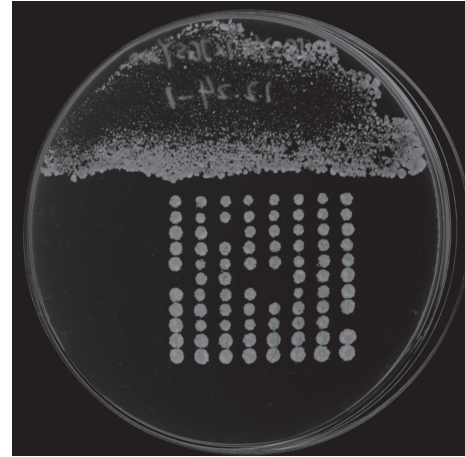

DY47925 × DY47926 -2  
Successful octad: 11

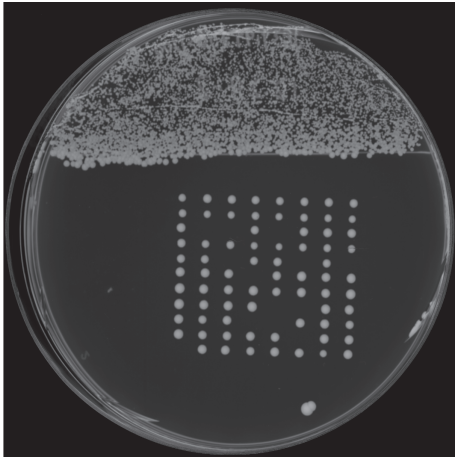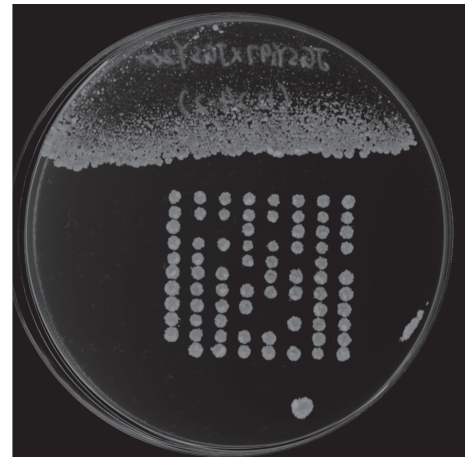

DY47925 × DY47926 -3  
Successful octad: 6

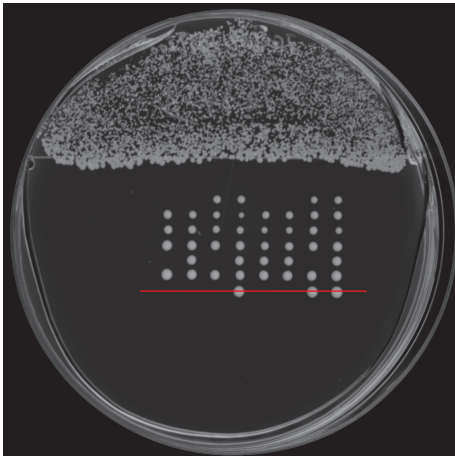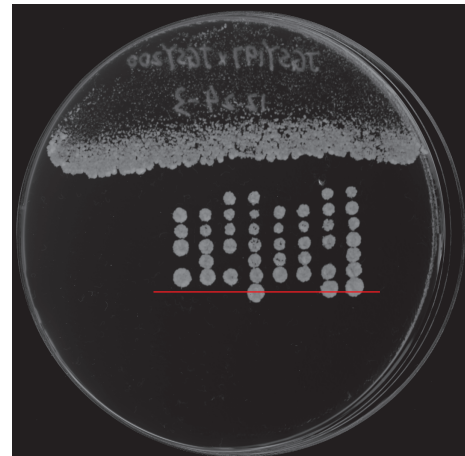

DY47925 × DY47926 -4  
Successful octad: 10

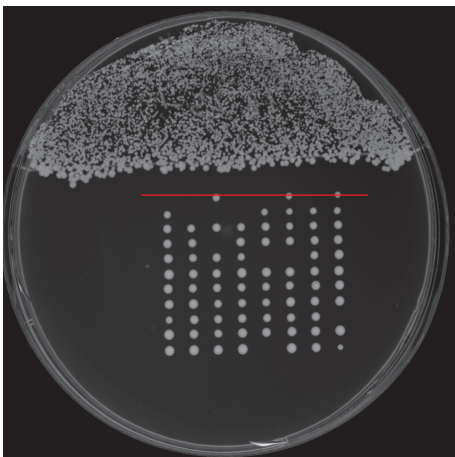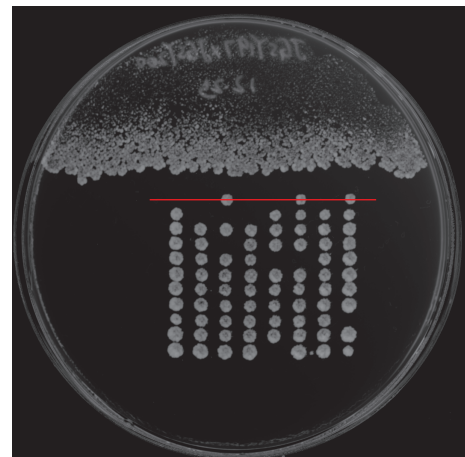

Supplement: fig9-figsupp5-data3 [file elife-81149-fig9-figsupp5-data3-v1.pdf]
