# Supplementary material for: The wtf meiotic driver gene family has unexpectedly persisted for over 100 million years
Source: eLife journal article supplement (doi:10.7554/elife.81149), 2022-09-21

*wtf62(SOCG\_04077)Δ/wtf62(SOCG\_04077)Δ* homozygous diploid

## YEST plate

## G418 plate

DY47923 × DY47924 -1  
Successful octad: 11

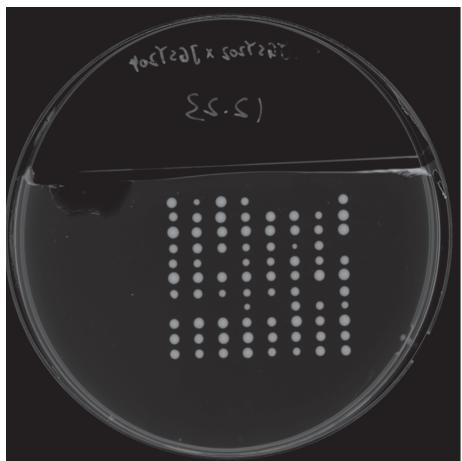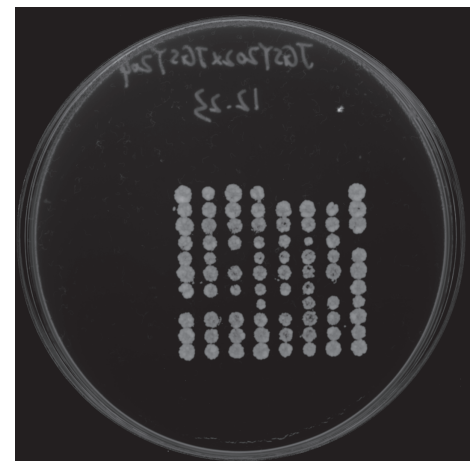

DY47923 × DY47924 -2  
Successful octad: 11

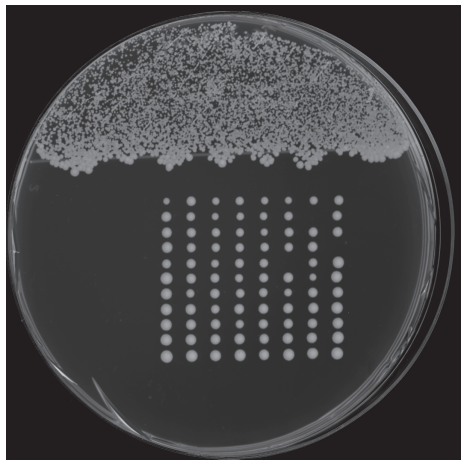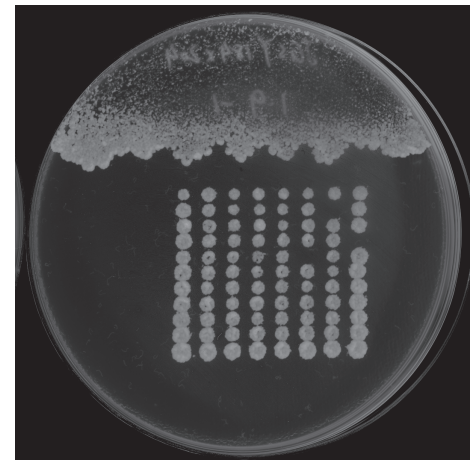

DY47923 × DY47924 -3  
Successful octad: 11

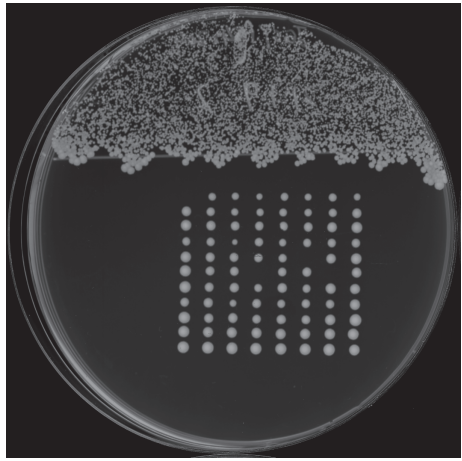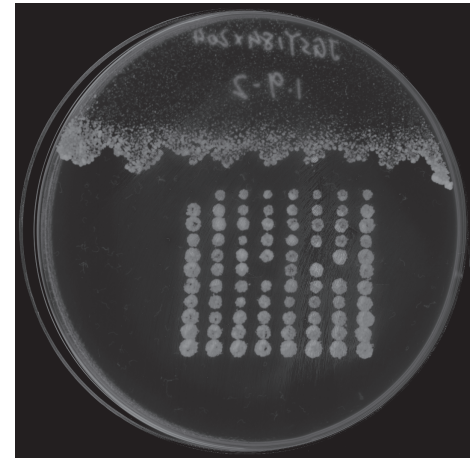

DY47923 × DY47924 -4  
Successful octad: 11

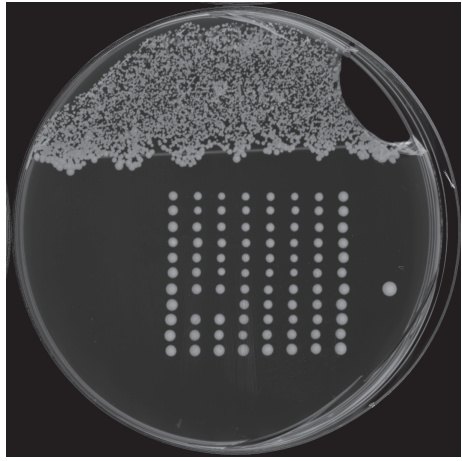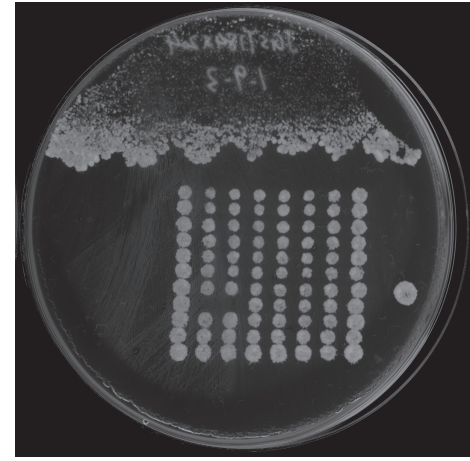

*wtf62(SOCG\_04077)Δ/wtf62(SOCG\_04077)Δ* homozygous diploid

## YEST plate

## G418 plate

DY47923 × DY47924 -5  
Successful octad: 11

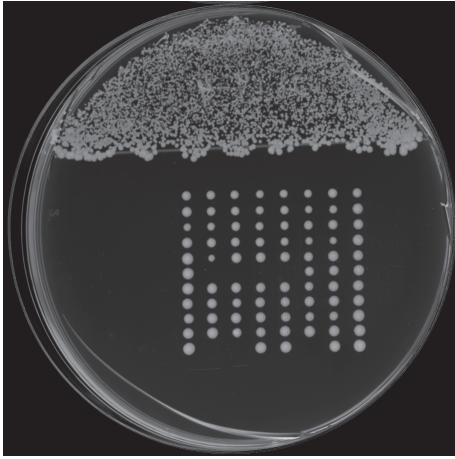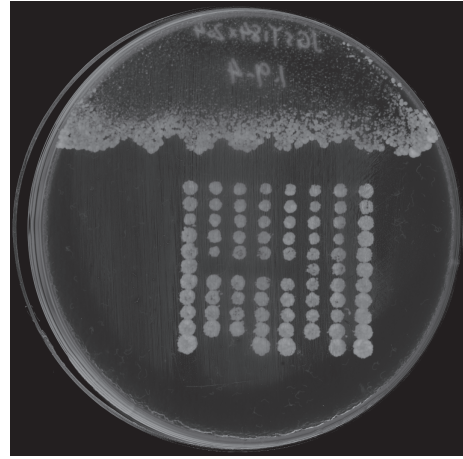

Supplement: fig9-figsupp6-data3 [file elife-81149-fig9-figsupp6-data3-v1.pdf]
