# Supplementary material for: The wtf meiotic driver gene family has unexpectedly persisted for over 100 million years
Source: eLife. 2022 Oct 13;11:e81149. doi: 10.7554/eLife.81149 (PMC9562144; doi:10.7554/eLife.81149)
Supplement: Figure 2—source data 1. — Table of the average size (in base pairs) of the exons and introns of intact wtf genes in all Schizosaccharomyces species. For S.chizosaccharomyces pombe, only the genes containing 5 exons were considered. [file elife-81149-fig2-data1.xlsx]

## Sheet: Sheet1
Species		Exon 1	Exon 2	Exon 3	Exon 4	Exon 5	Intron 1	Intron 2	Intron 3	Intron 4
S. octosporus		109	262.812	221.5	99.9583	79.4167	179.958	43.4583	40.5	57.375
S. osmophilus		111.29	246.161	233	111.774	76.6452	198.581	46.871	39.6774	55.4839
S. cryophilus		113.5	234	219	68	52	200	45	39	53
S. pombe	without unknown wtf genes	138.667	257	243.667	51.3333	74	175.667	49	40.4444	53.6667
	With unknown wtf genes	139.5	259.75	242.75	52.9167	65.5833	168	48.6667	40.0833	55.3333
