# Supplementary material for: The wtf meiotic driver gene family has unexpectedly persisted for over 100 million years
Source: eLife. 2022 Oct 13;11:e81149. doi: 10.7554/eLife.81149 (PMC9562144; doi:10.7554/eLife.81149)
Supplement: Figure 8—source data 1. — Summary of spore viability is shown in Table 1, and Tables 2–8 test the significance of the difference of spore viability by Fisher’s exact test. [file elife-81149-fig8-data1.xlsx]

## Sheet: Summary
Table Number	Desciption
1	wild cross viability
2.1	wtf25 heterozygote fertility test
2.2	wtf25 homozygote fertility test
3.1	wtf68 heterozygote fertility test
3.2	wtf68 homozygote fertility test
4.1	wtf33 heterozygote fertility test
4.2	wtf33 homozygote fertility test
5.1	wtf46 heterozygote fertility test
5.2	wtf46 homozygote fertility test
6.1	wtf60 heterozygote fertility test
6.2	wtf60 homozygote fertility test
7.1	wtf62 heterozygote fertility test
7.2	wtf62 homozygote fertility test
8.1	wtf21 heterozygote fertility test
8.2	wtf21 homozygote fertility test

## Sheet: 1
Cross ID	Total octad	Successful octad	Total spore (In successful octad)	Viable spore (In successful octad)
DY44286 × DY44287(2019-1)	10	10	80	73
DY44286 × DY44287(2019-2)	11	11	88	83
DY44286 × DY44287(2019-3)	11	11	88	77
DY44286 × DY44287(2019-4)	11	10	80	74
DY44286 × DY44287(2019-5)	11	11	88	84
DY44286 × DY44287(2020-1)	11	11	88	77
DY44286 × DY44287(2020-2)	11	11	88	75
DY44286 × DY44287(2020-3)	11	11	88	86
DY44286 × DY44287(2021-1)	11	11	88	79
DY44286 × DY44287(2021-2)	11	11	88	84
DY44286 × DY44287(2021-3)	11	11	88	79
DY44286 × DY44287(2021-4)	11	11	88	77
DY44286 × DY44287(2021-5)	11	10	80	74
DY44286 × DY44287(2021-6)	11	11	88	79
	153	151	1208	1101
Total viability	91.1424

## Sheet: 2.1
This spreadsheet performs Fisher's exact test for a 2x2 table.
For more information, see http://udel.edu/~mcdonald/statfishers.html.
The spreadsheet comes with the Adh data from that web page entered as an example.
To use it, replace the Adh data with your numbers.
The smaller column total must be less than 500.
	P-value:	9.13249e-45
	LIVE	DIE	SUM	row totals
Wild type diploid	1101	107	1208	1208
wtf25Δ/wtf25+	830	378	1208	1208
column totals	1931	485		2416
	column 1	column 2		row totals
row 1	378	830		1208
row 2	107	1101		1208
column totals	485	1931		2416
smaller column	378	107	485	3.59893e-45
	0	2.11859e-173	2.11859e-173
	1	1.71442e-170	1.71442e-170
	2	6.90718e-168	6.90718e-168
	3	1.8473e-165	1.8473e-165
	4	3.68958e-163	3.68958e-163
	5	5.87013e-161	5.87013e-161
	6	7.74953e-159	7.74953e-159
	7	8.73161e-157	8.73161e-157
	8	8.57153e-155	8.57153e-155
	9	7.44739e-153	7.44739e-153
	10	5.79864e-151	5.79864e-151
	11	4.08684e-149	4.08684e-149
	12	2.62901e-147	2.62901e-147
	13	1.5544e-145	1.5544e-145
	14	8.49723e-144	8.49723e-144
	15	4.31673e-142	4.31673e-142
	16	2.04705e-140	2.04705e-140
	17	9.09698e-139	9.09698e-139
	18	3.80158e-137	3.80158e-137
	19	1.49855e-135	1.49855e-135
	20	5.58753e-134	5.58753e-134
	21	1.97559e-132	1.97559e-132
	22	6.63875e-131	6.63875e-131
	23	2.12464e-129	2.12464e-129
	24	6.48805e-128	6.48805e-128
	25	1.89376e-126	1.89376e-126
	26	5.29191e-125	5.29191e-125
	27	1.41781e-123	1.41781e-123
	28	3.64699e-122	3.64699e-122
	29	9.01815e-121	9.01815e-121
	30	2.14625e-119	2.14625e-119
	31	4.92157e-118	4.92157e-118
	32	1.08853e-116	1.08853e-116
	33	2.32439e-115	2.32439e-115
	34	4.79634e-114	4.79634e-114
	35	9.57233e-113	9.57233e-113
	36	1.8492e-111	1.8492e-111
	37	3.46053e-110	3.46053e-110
	38	6.27782e-109	6.27782e-109
	39	1.1048e-107	1.1048e-107
	40	1.88733e-106	1.88733e-106
	41	3.13165e-105	3.13165e-105
	42	5.05029e-104	5.05029e-104
	43	7.91993e-103	7.91993e-103
	44	1.20843e-101	1.20843e-101
	45	1.7949e-100	1.7949e-100
	46	2.5965e-99	2.5965e-99
	47	3.6599e-98	3.6599e-98
	48	5.02899e-97	5.02899e-97
	49	6.73917e-96	6.73917e-96
	50	8.81103e-95	8.81103e-95
	51	1.12438e-93	1.12438e-93
	52	1.40098e-92	1.40098e-92
	53	1.70506e-91	1.70506e-91
	54	2.02764e-90	2.02764e-90
	55	2.35685e-89	2.35685e-89
	56	2.67857e-88	2.67857e-88
	57	2.97745e-87	2.97745e-87
	58	3.23805e-86	3.23805e-86
	59	3.44628e-85	3.44628e-85
	60	3.59061e-84	3.59061e-84
	61	3.66313e-83	3.66313e-83
	62	3.66033e-82	3.66033e-82
	63	3.58329e-81	3.58329e-81
	64	3.43752e-80	3.43752e-80
	65	3.23232e-79	3.23232e-79
	66	2.97981e-78	2.97981e-78
	67	2.69381e-77	2.69381e-77
	68	2.3886e-76	2.3886e-76
	69	2.07783e-75	2.07783e-75
	70	1.7736e-74	1.7736e-74
	71	1.48582e-73	1.48582e-73
	72	1.22188e-72	1.22188e-72
	73	9.86555e-72	9.86555e-72
	74	7.82212e-71	7.82212e-71
	75	6.09137e-70	6.09137e-70
	76	4.65981e-69	4.65981e-69
	77	3.50233e-68	3.50233e-68
	78	2.58674e-67	2.58674e-67
	79	1.87769e-66	1.87769e-66
	80	1.3398e-65	1.3398e-65
	81	9.39857e-65	9.39857e-65
	82	6.48272e-64	6.48272e-64
	83	4.39732e-63	4.39732e-63
	84	2.93369e-62	2.93369e-62
	85	1.92528e-61	1.92528e-61
	86	1.24304e-60	1.24304e-60
	87	7.89675e-60	7.89675e-60
	88	4.93666e-59	4.93666e-59
	89	3.03736e-58	3.03736e-58
	90	1.83945e-57	1.83945e-57
	91	1.09663e-56	1.09663e-56
	92	6.43673e-56	6.43673e-56
	93	3.72005e-55	3.72005e-55
	94	2.11719e-54	2.11719e-54
	95	1.18671e-53	1.18671e-53
	96	6.55163e-53	6.55163e-53
	97	3.56302e-52	3.56302e-52
	98	1.90895e-51	1.90895e-51
	99	1.00768e-50	1.00768e-50
	100	5.24132e-50	5.24132e-50
	101	2.68654e-49	2.68654e-49
	102	1.35712e-48	1.35712e-48
	103	6.757e-48	6.757e-48
	104	3.3162e-47	3.3162e-47
	105	1.60441e-46	1.60441e-46
	106	7.65269e-46	7.65269e-46
	107	3.59893e-45	3.59893e-45
	108	1.66889e-44
	109	7.63153e-44
	110	3.44159e-43
	111	1.53075e-42
	112	6.71549e-42
	113	2.90611e-41
	114	1.24062e-40
	115	5.22502e-40
	116	2.17115e-39
	117	8.90172e-39
	118	3.60138e-38
	119	1.43781e-37
	120	5.66503e-37
	121	2.20291e-36
	122	8.45494e-36
	123	3.20311e-35
	124	1.19786e-34
	125	4.42217e-34
	126	1.61171e-33
	127	5.79946e-33
	128	2.06042e-32
	129	7.22802e-32
	130	2.50379e-31
	131	8.56478e-31
	132	2.89331e-30
	133	9.65287e-30
	134	3.1807e-29
	135	1.03517e-28
	136	3.32773e-28
	137	1.05669e-27
	138	3.31464e-27
	139	1.02713e-26
	140	3.14443e-26
	141	9.51042e-26
	142	2.84196e-25
	143	8.39103e-25
	144	2.44799e-24
	145	7.05696e-24
	146	2.01028e-23
	147	5.65907e-23
	148	1.57433e-22
	149	4.32843e-22
	150	1.17614e-21
	151	3.15865e-21
	152	8.3844e-21
	153	2.19981e-20
	154	5.70499e-20
	155	1.4625e-19
	156	3.70617e-19
	157	9.28443e-19
	158	2.29932e-18
	159	5.6295e-18
	160	1.36264e-17
	161	3.26099e-17
	162	7.71582e-17
	163	1.80507e-16
	164	4.17542e-16
	165	9.55011e-16
	166	2.1599e-15
	167	4.83042e-15
	168	1.06826e-14
	169	2.33624e-14
	170	5.05265e-14
	171	1.08067e-13
	172	2.28586e-13
	173	4.7819e-13
	174	9.89358e-13
	175	2.02451e-12
	176	4.09741e-12
	177	8.20223e-12
	178	1.62404e-11
	179	3.18063e-11
	180	6.16154e-11
	181	1.18069e-10
	182	2.238e-10
	183	4.19633e-10
	184	7.78351e-10
	185	1.42819e-09
	186	2.59242e-09
	187	4.65526e-09
	188	8.27008e-09
	189	1.45348e-08
	190	2.52727e-08
	191	4.34752e-08
	192	7.39924e-08
	193	1.24594e-07
	194	2.07574e-07
	195	3.42158e-07
	196	5.58037e-07
	197	9.00508e-07
	198	1.43783e-06
	199	2.27157e-06
	200	3.551e-06
	201	5.49273e-06
	202	8.40704e-06
	203	1.27327e-05
	204	1.90821e-05
	205	2.82985e-05
	206	4.15279e-05
	207	6.03057e-05
	208	8.66611e-05
	209	0.000123237
	210	0.000173427
	211	0.000241518
	212	0.000332849
	213	0.000453957
	214	0.000612707
	215	0.000818403
	216	0.00108183
	217	0.00141526
	218	0.00183231
	219	0.00234775
	220	0.00297711
	221	0.00373623
	222	0.00464055
	223	0.00570435
	224	0.00693978
	225	0.00835585
	226	0.00995732
	227	0.0117437
	228	0.0137081
	229	0.0158367
	230	0.0181078
	231	0.020492
	232	0.0229521
	233	0.0254436
	234	0.0279162
	235	0.0303148
	236	0.032582
	237	0.0346596
	238	0.0364917
	239	0.0380268
	240	0.0392203
	241	0.0400367
	242	0.0404513
	243	0.0404513
	244	0.0400367
	245	0.0392203
	246	0.0380268
	247	0.0364917
	248	0.0346596
	249	0.032582
	250	0.0303148
	251	0.0279162
	252	0.0254436
	253	0.0229521
	254	0.020492
	255	0.0181078
	256	0.0158367
	257	0.0137081
	258	0.0117437
	259	0.00995732
	260	0.00835585
	261	0.00693978
	262	0.00570435
	263	0.00464055
	264	0.00373623
	265	0.00297711
	266	0.00234775
	267	0.00183231
	268	0.00141526
	269	0.00108183
	270	0.000818403
	271	0.000612707
	272	0.000453957
	273	0.000332849
	274	0.000241518
	275	0.000173427
	276	0.000123237
	277	8.66611e-05
	278	6.03057e-05
	279	4.15279e-05
	280	2.82985e-05
	281	1.90821e-05
	282	1.27327e-05
	283	8.40704e-06
	284	5.49273e-06
	285	3.551e-06
	286	2.27157e-06
	287	1.43783e-06
	288	9.00508e-07
	289	5.58037e-07
	290	3.42158e-07
	291	2.07574e-07
	292	1.24594e-07
	293	7.39924e-08
	294	4.34752e-08
	295	2.52727e-08
	296	1.45348e-08
	297	8.27008e-09
	298	4.65526e-09
	299	2.59242e-09
	300	1.42819e-09
	301	7.78351e-10
	302	4.19633e-10
	303	2.238e-10
	304	1.18069e-10
	305	6.16154e-11
	306	3.18063e-11
	307	1.62404e-11
	308	8.20223e-12
	309	4.09741e-12
	310	2.02451e-12
	311	9.89358e-13
	312	4.7819e-13
	313	2.28586e-13
	314	1.08067e-13
	315	5.05265e-14
	316	2.33624e-14
	317	1.06826e-14
	318	4.83042e-15
	319	2.1599e-15
	320	9.55011e-16
	321	4.17542e-16
	322	1.80507e-16
	323	7.71582e-17
	324	3.26099e-17
	325	1.36264e-17
	326	5.6295e-18
	327	2.29932e-18
	328	9.28443e-19
	329	3.70617e-19
	330	1.4625e-19
	331	5.70499e-20
	332	2.19981e-20
	333	8.3844e-21
	334	3.15865e-21
	335	1.17614e-21
	336	4.32843e-22
	337	1.57433e-22
	338	5.65907e-23
	339	2.01028e-23
	340	7.05696e-24
	341	2.44799e-24
	342	8.39103e-25
	343	2.84196e-25
	344	9.51042e-26
	345	3.14443e-26
	346	1.02713e-26
	347	3.31464e-27
	348	1.05669e-27
	349	3.32773e-28
	350	1.03517e-28
	351	3.1807e-29
	352	9.65287e-30
	353	2.89331e-30
	354	8.56478e-31
	355	2.50379e-31
	356	7.22802e-32
	357	2.06042e-32
	358	5.79946e-33
	359	1.61171e-33
	360	4.42217e-34
	361	1.19786e-34
	362	3.20311e-35
	363	8.45494e-36
	364	2.20291e-36
	365	5.66503e-37
	366	1.43781e-37
	367	3.60138e-38
	368	8.90172e-39
	369	2.17115e-39
	370	5.22502e-40
	371	1.24062e-40
	372	2.90611e-41
	373	6.71549e-42
	374	1.53075e-42
	375	3.44159e-43
	376	7.63153e-44
	377	1.66889e-44
	378	3.59893e-45	3.59893e-45
	379	7.65269e-46	7.65269e-46
	380	1.60441e-46	1.60441e-46
	381	3.3162e-47	3.3162e-47
	382	6.757e-48	6.757e-48
	383	1.35712e-48	1.35712e-48
	384	2.68654e-49	2.68654e-49
	385	5.24132e-50	5.24132e-50
	386	1.00768e-50	1.00768e-50
	387	1.90895e-51	1.90895e-51
	388	3.56302e-52	3.56302e-52
	389	6.55163e-53	6.55163e-53
	390	1.18671e-53	1.18671e-53
	391	2.11719e-54	2.11719e-54
	392	3.72005e-55	3.72005e-55
	393	6.43673e-56	6.43673e-56
	394	1.09663e-56	1.09663e-56
	395	1.83945e-57	1.83945e-57
	396	3.03736e-58	3.03736e-58
	397	4.93666e-59	4.93666e-59
	398	7.89675e-60	7.89675e-60
	399	1.24304e-60	1.24304e-60
	400	1.92528e-61	1.92528e-61
	401	2.93369e-62	2.93369e-62
	402	4.39732e-63	4.39732e-63
	403	6.48272e-64	6.48272e-64
	404	9.39857e-65	9.39857e-65
	405	1.3398e-65	1.3398e-65
	406	1.87769e-66	1.87769e-66
	407	2.58674e-67	2.58674e-67
	408	3.50233e-68	3.50233e-68
	409	4.65981e-69	4.65981e-69
	410	6.09137e-70	6.09137e-70
	411	7.82212e-71	7.82212e-71
	412	9.86555e-72	9.86555e-72
	413	1.22188e-72	1.22188e-72
	414	1.48582e-73	1.48582e-73
	415	1.7736e-74	1.7736e-74
	416	2.07783e-75	2.07783e-75
	417	2.3886e-76	2.3886e-76
	418	2.69381e-77	2.69381e-77
	419	2.97981e-78	2.97981e-78
	420	3.23232e-79	3.23232e-79
	421	3.43752e-80	3.43752e-80
	422	3.58329e-81	3.58329e-81
	423	3.66033e-82	3.66033e-82
	424	3.66313e-83	3.66313e-83
	425	3.59061e-84	3.59061e-84
	426	3.44628e-85	3.44628e-85
	427	3.23805e-86	3.23805e-86
	428	2.97745e-87	2.97745e-87
	429	2.67857e-88	2.67857e-88
	430	2.35685e-89	2.35685e-89
	431	2.02764e-90	2.02764e-90
	432	1.70506e-91	1.70506e-91
	433	1.40098e-92	1.40098e-92
	434	1.12438e-93	1.12438e-93
	435	8.81103e-95	8.81103e-95
	436	6.73917e-96	6.73917e-96
	437	5.02899e-97	5.02899e-97
	438	3.6599e-98	3.6599e-98
	439	2.5965e-99	2.5965e-99
	440	1.7949e-100	1.7949e-100
	441	1.20843e-101	1.20843e-101
	442	7.91993e-103	7.91993e-103
	443	5.05029e-104	5.05029e-104
	444	3.13165e-105	3.13165e-105
	445	1.88733e-106	1.88733e-106
	446	1.1048e-107	1.1048e-107
	447	6.27782e-109	6.27782e-109
	448	3.46053e-110	3.46053e-110
	449	1.8492e-111	1.8492e-111
	450	9.57233e-113	9.57233e-113
	451	4.79634e-114	4.79634e-114
	452	2.32439e-115	2.32439e-115
	453	1.08853e-116	1.08853e-116
	454	4.92157e-118	4.92157e-118
	455	2.14625e-119	2.14625e-119
	456	9.01815e-121	9.01815e-121
	457	3.64699e-122	3.64699e-122
	458	1.41781e-123	1.41781e-123
	459	5.29191e-125	5.29191e-125
	460	1.89376e-126	1.89376e-126
	461	6.48805e-128	6.48805e-128
	462	2.12464e-129	2.12464e-129
	463	6.63875e-131	6.63875e-131
	464	1.97559e-132	1.97559e-132
	465	5.58753e-134	5.58753e-134
	466	1.49855e-135	1.49855e-135
	467	3.80158e-137	3.80158e-137
	468	9.09698e-139	9.09698e-139
	469	2.04705e-140	2.04705e-140
	470	4.31673e-142	4.31673e-142
	471	8.49723e-144	8.49723e-144
	472	1.5544e-145	1.5544e-145
	473	2.62901e-147	2.62901e-147
	474	4.08684e-149	4.08684e-149
	475	5.79864e-151	5.79864e-151
	476	7.44739e-153	7.44739e-153
	477	8.57153e-155	8.57153e-155
	478	8.73161e-157	8.73161e-157
	479	7.74953e-159	7.74953e-159
	480	5.87013e-161	5.87013e-161
	481	3.68958e-163	3.68958e-163
	482	1.8473e-165	1.8473e-165
	483	6.90718e-168	6.90718e-168
	484	1.71442e-170	1.71442e-170
	485	2.11859e-173	2.11859e-173
	486
	487
	488
	489
	490
	491
	492
	493
	494
	495
	496
	497
	498
	499
	500

## Sheet: 2.2
This spreadsheet performs Fisher's exact test for a 2x2 table.
For more information, see http://udel.edu/~mcdonald/statfishers.html.
The spreadsheet comes with the Adh data from that web page entered as an example.
To use it, replace the Adh data with your numbers.
The smaller column total must be less than 500.
	P-value:	0.617845
	LIVE	DIE	SUM	row totals
Wild type diploid	1101	107	1208	1208
wtf25Δ/wtf25Δ	615	65	680	680
column totals	1716	172		1888
	column 1	column 2		row totals
row 1	65	615		680
row 2	107	1101		1208
column totals	172	1716		1888
smaller column	65	107	172	0.0578487
	0	3.77276e-36	3.77276e-36
	1	4.25518e-34	4.25518e-34
	2	2.37989e-32	2.37989e-32
	3	8.80032e-31	8.80032e-31
	4	2.42036e-29	2.42036e-29
	5	5.281e-28	5.281e-28
	6	9.52176e-27	9.52176e-27
	7	1.45916e-25	1.45916e-25
	8	1.94004e-24	1.94004e-24
	9	2.27335e-23	2.27335e-23
	10	2.37708e-22	2.37708e-22
	11	2.24024e-21	2.24024e-21
	12	1.91869e-20	1.91869e-20
	13	1.50377e-19	1.50377e-19
	14	1.08489e-18	1.08489e-18
	15	7.24143e-18	7.24143e-18
	16	4.49169e-17	4.49169e-17
	17	2.59912e-16	2.59912e-16
	18	1.40785e-15	1.40785e-15
	19	7.16028e-15	7.16028e-15
	20	3.4287e-14	3.4287e-14
	21	1.54961e-13	1.54961e-13
	22	6.62486e-13	6.62486e-13
	23	2.68454e-12	2.68454e-12
	24	1.03301e-11	1.03301e-11
	25	3.78107e-11	3.78107e-11
	26	1.31849e-10	1.31849e-10
	27	4.38641e-10	4.38641e-10
	28	1.39409e-09	1.39409e-09
	29	4.23792e-09	4.23792e-09
	30	1.23365e-08	1.23365e-08
	31	3.44245e-08	3.44245e-08
	32	9.21743e-08	9.21743e-08
	33	2.3704e-07	2.3704e-07
	34	5.85973e-07	5.85973e-07
	35	1.39358e-06	1.39358e-06
	36	3.19091e-06	3.19091e-06
	37	7.03944e-06	7.03944e-06
	38	1.49725e-05	1.49725e-05
	39	3.07228e-05	3.07228e-05
	40	6.08554e-05	6.08554e-05
	41	0.000116427	0.000116427
	42	0.000215257	0.000215257
	43	0.000384797	0.000384797
	44	0.000665402	0.000665402
	45	0.00111356	0.00111356
	46	0.00180429	0.00180429
	47	0.00283165	0.00283165
	48	0.00430608	0.00430608
	49	0.00634739	0.00634739
	50	0.00907256	0.00907256
	51	0.0125785	0.0125785
	52	0.0169213	0.0169213
	53	0.0220938	0.0220938
	54	0.0280069	0.0280069
	55	0.0344774	0.0344774
	56	0.0412277	0.0412277
	57	0.0479002	0.0479002
	58	0.0540851	0.0540851
	59	0.0593618
	60	0.0633454
	61	0.0657337
	62	0.066345
	63	0.0651405
	64	0.0622286
	65	0.0578487	0.0578487
	66	0.0523392	0.0523392
	67	0.0460947	0.0460947
	68	0.0395205	0.0395205
	69	0.032991	0.032991
	70	0.0268177	0.0268177
	71	0.0212298	0.0212298
	72	0.0163686	0.0163686
	73	0.0122931	0.0122931
	74	0.00899353	0.00899353
	75	0.00640993	0.00640993
	76	0.00445105	0.00445105
	77	0.00301151	0.00301151
	78	0.00198539	0.00198539
	79	0.00127546	0.00127546
	80	0.000798493	0.000798493
	81	0.000487161	0.000487161
	82	0.000289658	0.000289658
	83	0.00016785	0.00016785
	84	9.47954e-05	9.47954e-05
	85	5.21785e-05	5.21785e-05
	86	2.79922e-05	2.79922e-05
	87	1.4636e-05	1.4636e-05
	88	7.45843e-06	7.45843e-06
	89	3.7043e-06	3.7043e-06
	90	1.79304e-06	1.79304e-06
	91	8.45845e-07	8.45845e-07
	92	3.88861e-07	3.88861e-07
	93	1.74215e-07	1.74215e-07
	94	7.60578e-08	7.60578e-08
	95	3.23556e-08	3.23556e-08
	96	1.34115e-08	1.34115e-08
	97	5.41631e-09	5.41631e-09
	98	2.13105e-09	2.13105e-09
	99	8.16804e-10	8.16804e-10
	100	3.04957e-10	3.04957e-10
	101	1.10896e-10	1.10896e-10
	102	3.92746e-11	3.92746e-11
	103	1.35449e-11	1.35449e-11
	104	4.54845e-12	4.54845e-12
	105	1.48703e-12	1.48703e-12
	106	4.7325e-13	4.7325e-13
	107	1.46594e-13	1.46594e-13
	108	4.4191e-14	4.4191e-14
	109	1.29622e-14	1.29622e-14
	110	3.69894e-15	3.69894e-15
	111	1.02673e-15	1.02673e-15
	112	2.77166e-16	2.77166e-16
	113	7.27513e-17	7.27513e-17
	114	1.85641e-17	1.85641e-17
	115	4.6041e-18	4.6041e-18
	116	1.10958e-18	1.10958e-18
	117	2.59782e-19	2.59782e-19
	118	5.90735e-20	5.90735e-20
	119	1.30435e-20	1.30435e-20
	120	2.79572e-21	2.79572e-21
	121	5.81522e-22	5.81522e-22
	122	1.17349e-22	1.17349e-22
	123	2.29665e-23	2.29665e-23
	124	4.3578e-24	4.3578e-24
	125	8.01384e-25	8.01384e-25
	126	1.42776e-25	1.42776e-25
	127	2.46342e-26	2.46342e-26
	128	4.11447e-27	4.11447e-27
	129	6.64951e-28	6.64951e-28
	130	1.03937e-28	1.03937e-28
	131	1.5705e-29	1.5705e-29
	132	2.29286e-30	2.29286e-30
	133	3.2326e-31	3.2326e-31
	134	4.39859e-32	4.39859e-32
	135	5.77296e-33	5.77296e-33
	136	7.30349e-34	7.30349e-34
	137	8.90047e-35	8.90047e-35
	138	1.04408e-35	1.04408e-35
	139	1.17804e-36	1.17804e-36
	140	1.27742e-37	1.27742e-37
	141	1.3301e-38	1.3301e-38
	142	1.32862e-39	1.32862e-39
	143	1.2719e-40	1.2719e-40
	144	1.16569e-41	1.16569e-41
	145	1.02161e-42	1.02161e-42
	146	8.55133e-44	8.55133e-44
	147	6.82726e-45	6.82726e-45
	148	5.19159e-46	5.19159e-46
	149	3.75421e-47	3.75421e-47
	150	2.5773e-48	2.5773e-48
	151	1.67662e-49	1.67662e-49
	152	1.03146e-50	1.03146e-50
	153	5.98744e-52	5.98744e-52
	154	3.27143e-53	3.27143e-53
	155	1.67785e-54	1.67785e-54
	156	8.05304e-56	8.05304e-56
	157	3.60472e-57	3.60472e-57
	158	1.499e-58	1.499e-58
	159	5.76549e-60	5.76549e-60
	160	2.04064e-61	2.04064e-61
	161	6.6074e-63	6.6074e-63
	162	1.94365e-64	1.94365e-64
	163	5.1516e-66	5.1516e-66
	164	1.21801e-67	1.21801e-67
	165	2.53725e-69	2.53725e-69
	166	4.58411e-71	4.58411e-71
	167	7.037e-73	7.037e-73
	168	8.92358e-75	8.92358e-75
	169	8.97419e-77	8.97419e-77
	170	6.71029e-79	6.71029e-79
	171	3.31618e-81	3.31618e-81
	172	8.12382e-84	8.12382e-84
	173
	174
	175
	176
	177
	178
	179
	180
	181
	182
	183
	184
	185
	186
	187
	188
	189
	190
	191
	192
	193
	194
	195
	196
	197
	198
	199
	200
	201
	202
	203
	204
	205
	206
	207
	208
	209
	210
	211
	212
	213
	214
	215
	216
	217
	218
	219
	220
	221
	222
	223
	224
	225
	226
	227
	228
	229
	230
	231
	232
	233
	234
	235
	236
	237
	238
	239
	240
	241
	242
	243
	244
	245
	246
	247
	248
	249
	250
	251
	252
	253
	254
	255
	256
	257
	258
	259
	260
	261
	262
	263
	264
	265
	266
	267
	268
	269
	270
	271
	272
	273
	274
	275
	276
	277
	278
	279
	280
	281
	282
	283
	284
	285
	286
	287
	288
	289
	290
	291
	292
	293
	294
	295
	296
	297
	298
	299
	300
	301
	302
	303
	304
	305
	306
	307
	308
	309
	310
	311
	312
	313
	314
	315
	316
	317
	318
	319
	320
	321
	322
	323
	324
	325
	326
	327
	328
	329
	330
	331
	332
	333
	334
	335
	336
	337
	338
	339
	340
	341
	342
	343
	344
	345
	346
	347
	348
	349
	350
	351
	352
	353
	354
	355
	356
	357
	358
	359
	360
	361
	362
	363
	364
	365
	366
	367
	368
	369
	370
	371
	372
	373
	374
	375
	376
	377
	378
	379
	380
	381
	382
	383
	384
	385
	386
	387
	388
	389
	390
	391
	392
	393
	394
	395
	396
	397
	398
	399
	400
	401
	402
	403
	404
	405
	406
	407
	408
	409
	410
	411
	412
	413
	414
	415
	416
	417
	418
	419
	420
	421
	422
	423
	424
	425
	426
	427
	428
	429
	430
	431
	432
	433
	434
	435
	436
	437
	438
	439
	440
	441
	442
	443
	444
	445
	446
	447
	448
	449
	450
	451
	452
	453
	454
	455
	456
	457
	458
	459
	460
	461
	462
	463
	464
	465
	466
	467
	468
	469
	470
	471
	472
	473
	474
	475
	476
	477
	478
	479
	480
	481
	482
	483
	484
	485
	486
	487
	488
	489
	490
	491
	492
	493
	494
	495
	496
	497
	498
	499
	500

## Sheet: 3.1
This spreadsheet performs Fisher's exact test for a 2x2 table.
For more information, see http://udel.edu/~mcdonald/statfishers.html.
The spreadsheet comes with the Adh data from that web page entered as an example.
To use it, replace the Adh data with your numbers.
The smaller column total must be less than 500.
	P-value:	1.74711e-40
	LIVE	DIE	SUM	row totals
Wild type diploid	1101	107	1208	1208
wtf68Δ/wtf68+	576	272	848	848
column totals	1677	379		2056
	column 1	column 2		row totals
row 1	272	576		848
row 2	107	1101		1208
column totals	379	1677		2056
smaller column	272	107	379	1.11423e-40
	0	4.56125e-101	4.56125e-101
	1	1.7662e-98	1.7662e-98
	2	3.40239e-96	3.40239e-96
	3	4.34762e-94	4.34762e-94
	4	4.14564e-92	4.14564e-92
	5	3.14651e-90	3.14651e-90
	6	1.98011e-88	1.98011e-88
	7	1.06269e-86	1.06269e-86
	8	4.96513e-85	4.96513e-85
	9	2.05162e-83	2.05162e-83
	10	7.591e-82	7.591e-82
	11	2.54037e-80	2.54037e-80
	12	7.75342e-79	7.75342e-79
	13	2.17325e-77	2.17325e-77
	14	5.62759e-76	5.62759e-76
	15	1.35315e-74	1.35315e-74
	16	3.03471e-73	3.03471e-73
	17	6.37276e-72	6.37276e-72
	18	1.25742e-70	1.25742e-70
	19	2.33839e-69	2.33839e-69
	20	4.10995e-68	4.10995e-68
	21	6.84421e-67	6.84421e-67
	22	1.08233e-65	1.08233e-65
	23	1.6287e-64	1.6287e-64
	24	2.3366e-63	2.3366e-63
	25	3.20141e-62	3.20141e-62
	26	4.19571e-61	4.19571e-61
	27	5.26762e-60	5.26762e-60
	28	6.34397e-59	6.34397e-59
	29	7.33832e-58	7.33832e-58
	30	8.16271e-57	8.16271e-57
	31	8.74084e-56	8.74084e-56
	32	9.01989e-55	9.01989e-55
	33	8.97841e-54	8.97841e-54
	34	8.62867e-53	8.62867e-53
	35	8.01319e-52	8.01319e-52
	36	7.19674e-51	7.19674e-51
	37	6.25556e-50	6.25556e-50
	38	5.26636e-49	5.26636e-49
	39	4.297e-48	4.297e-48
	40	3.40027e-47	3.40027e-47
	41	2.61109e-46	2.61109e-46
	42	1.9469e-45	1.9469e-45
	43	1.41034e-44	1.41034e-44
	44	9.93098e-44	9.93098e-44
	45	6.80094e-43	6.80094e-43
	46	4.53174e-42	4.53174e-42
	47	2.93956e-41	2.93956e-41
	48	1.857e-40
	49	1.14298e-39
	50	6.85711e-39
	51	4.01132e-38
	52	2.28897e-37
	53	1.27455e-36
	54	6.92766e-36
	55	3.67684e-35
	56	1.90617e-34
	57	9.65565e-34
	58	4.78038e-33
	59	2.31382e-32
	60	1.09522e-31
	61	5.07108e-31
	62	2.29738e-30
	63	1.01861e-29
	64	4.42114e-29
	65	1.87893e-28
	66	7.8205e-28
	67	3.18862e-27
	68	1.27382e-26
	69	4.98697e-26
	70	1.91372e-25
	71	7.19972e-25
	72	2.65601e-24
	73	9.60949e-24
	74	3.41039e-23
	75	1.18745e-22
	76	4.05701e-22
	77	1.36034e-21
	78	4.4772e-21
	79	1.44661e-20
	80	4.58928e-20
	81	1.42972e-19
	82	4.37452e-19
	83	1.31475e-18
	84	3.88191e-18
	85	1.12615e-17
	86	3.21032e-17
	87	8.99406e-17
	88	2.47669e-16
	89	6.70417e-16
	90	1.78413e-15
	91	4.66836e-15
	92	1.20117e-14
	93	3.03945e-14
	94	7.56448e-14
	95	1.85182e-13
	96	4.45964e-13
	97	1.05663e-12
	98	2.46323e-12
	99	5.65053e-12
	100	1.2756e-11
	101	2.8341e-11
	102	6.1977e-11
	103	1.33412e-10
	104	2.82713e-10
	105	5.89815e-10
	106	1.21154e-09
	107	2.45044e-09
	108	4.88054e-09
	109	9.57282e-09
	110	1.84923e-08
	111	3.51842e-08
	112	6.5939e-08
	113	1.21731e-07
	114	2.21388e-07
	115	3.96667e-07
	116	7.00236e-07
	117	1.21796e-06
	118	2.08747e-06
	119	3.52557e-06
	120	5.8679e-06
	121	9.62509e-06
	122	1.55603e-05
	123	2.4794e-05
	124	3.89412e-05
	125	6.02879e-05
	126	9.20085e-05
	127	0.000138428
	128	0.000205323
	129	0.000300254
	130	0.000432908
	131	0.000615428
	132	0.000862682
	133	0.00119243
	134	0.00162534
	135	0.00218473
	136	0.00289608
	137	0.00378616
	138	0.00488179
	139	0.00620817
	140	0.00778699
	141	0.00963407
	142	0.0117571
	143	0.014153
	144	0.0168064
	145	0.0196874
	146	0.0227511
	147	0.0259375
	148	0.0291728
	149	0.0323715
	150	0.03544
	151	0.0382809
	152	0.0407978
	153	0.0429012
	154	0.0445131
	155	0.0455726
	156	0.0460388
	157	0.0458942
	158	0.0451456
	159	0.043823
	160	0.0419786
	161	0.0396825
	162	0.0370189
	163	0.0340807
	164	0.0309642
	165	0.0277641
	166	0.024569
	167	0.0214573
	168	0.018495
	169	0.0157336
	170	0.01321
	171	0.0109467
	172	0.00895307
	173	0.00722729
	174	0.00575832
	175	0.00452833
	176	0.00351483
	177	0.00269277
	178	0.00203621
	179	0.00151978
	180	0.00111963
	181	0.000814146
	182	0.000584347
	183	0.00041398
	184	0.000289488
	185	0.000199813
	186	0.000136132
	187	9.1546e-05
	188	6.07664e-05
	189	3.98136e-05
	190	2.57479e-05
	191	1.6436e-05
	192	1.0356e-05
	193	6.44065e-06
	194	3.95373e-06
	195	2.39564e-06
	196	1.43276e-06
	197	8.45781e-07
	198	4.92805e-07
	199	2.83413e-07
	200	1.60876e-07
	201	9.01337e-08
	202	4.98427e-08
	203	2.72039e-08
	204	1.46546e-08
	205	7.79153e-09
	206	4.08861e-09
	207	2.11751e-09
	208	1.08236e-09
	209	5.46013e-10
	210	2.71843e-10
	211	1.3357e-10
	212	6.47697e-11
	213	3.09955e-11
	214	1.4638e-11
	215	6.82207e-12
	216	3.13757e-12
	217	1.42399e-12
	218	6.37746e-13
	219	2.81844e-13
	220	1.22908e-13
	221	5.2888e-14
	222	2.24557e-14
	223	9.40761e-15
	224	3.88873e-15
	225	1.58599e-15
	226	6.38188e-16
	227	2.53361e-16
	228	9.92352e-17
	229	3.83454e-17
	230	1.46174e-17
	231	5.49703e-18
	232	2.03926e-18
	233	7.46259e-19
	234	2.69382e-19
	235	9.59169e-20
	236	3.36865e-20
	237	1.16691e-20
	238	3.98682e-21
	239	1.3434e-21
	240	4.4644e-22
	241	1.46312e-22
	242	4.72872e-23
	243	1.50708e-23
	244	4.73631e-24
	245	1.46771e-24
	246	4.48455e-25
	247	1.35101e-25
	248	4.01272e-26
	249	1.17501e-26
	250	3.39197e-27
	251	9.65263e-28
	252	2.70772e-28
	253	7.48696e-29
	254	2.04047e-29
	255	5.48098e-30
	256	1.45099e-30
	257	3.78555e-31
	258	9.73255e-32
	259	2.46567e-32
	260	6.15504e-33
	261	1.51387e-33
	262	3.66845e-34
	263	8.75764e-35
	264	2.05957e-35
	265	4.77116e-36
	266	1.08868e-36
	267	2.44671e-37
	268	5.41545e-38
	269	1.1804e-38
	270	2.53361e-39
	271	5.35467e-40
	272	1.11423e-40	1.11423e-40
	273	2.28264e-41	2.28264e-41
	274	4.60348e-42	4.60348e-42
	275	9.13872e-43	9.13872e-43
	276	1.78567e-43	1.78567e-43
	277	3.434e-44	3.434e-44
	278	6.49896e-45	6.49896e-45
	279	1.21031e-45	1.21031e-45
	280	2.21778e-46	2.21778e-46
	281	3.99828e-47	3.99828e-47
	282	7.09119e-48	7.09119e-48
	283	1.23713e-48	1.23713e-48
	284	2.12287e-49	2.12287e-49
	285	3.58257e-50	3.58257e-50
	286	5.94553e-51	5.94553e-51
	287	9.70205e-52	9.70205e-52
	288	1.55657e-52	1.55657e-52
	289	2.45504e-53	2.45504e-53
	290	3.80614e-54	3.80614e-54
	291	5.7996e-55	5.7996e-55
	292	8.68455e-56	8.68455e-56
	293	1.27785e-56	1.27785e-56
	294	1.84733e-57	1.84733e-57
	295	2.62353e-58	2.62353e-58
	296	3.6597e-59	3.6597e-59
	297	5.01381e-60	5.01381e-60
	298	6.74518e-61	6.74518e-61
	299	8.90965e-62	8.90965e-62
	300	1.15533e-62	1.15533e-62
	301	1.47052e-63	1.47052e-63
	302	1.83689e-64	1.83689e-64
	303	2.25153e-65	2.25153e-65
	304	2.7076e-66	2.7076e-66
	305	3.19397e-67	3.19397e-67
	306	3.69526e-68	3.69526e-68
	307	4.19229e-69	4.19229e-69
	308	4.66304e-70	4.66304e-70
	309	5.08418e-71	5.08418e-71
	310	5.43278e-72	5.43278e-72
	311	5.68838e-73	5.68838e-73
	312	5.83487e-74	5.83487e-74
	313	5.8622e-75	5.8622e-75
	314	5.76743e-76	5.76743e-76
	315	5.55521e-77	5.55521e-77
	316	5.23739e-78	5.23739e-78
	317	4.83196e-79	4.83196e-79
	318	4.36133e-80	4.36133e-80
	319	3.85028e-81	3.85028e-81
	320	3.32375e-82	3.32375e-82
	321	2.80486e-83	2.80486e-83
	322	2.31323e-84	2.31323e-84
	323	1.86391e-85	1.86391e-85
	324	1.46689e-86	1.46689e-86
	325	1.1272e-87	1.1272e-87
	326	8.45471e-89	8.45471e-89
	327	6.18785e-90	6.18785e-90
	328	4.41747e-91	4.41747e-91
	329	3.07498e-92	3.07498e-92
	330	2.08633e-93	2.08633e-93
	331	1.37918e-94	1.37918e-94
	332	8.8794e-96	8.8794e-96
	333	5.5652e-97	5.5652e-97
	334	3.39406e-98	3.39406e-98
	335	2.01325e-99	2.01325e-99
	336	1.16092e-100	1.16092e-100
	337	6.50448e-102	6.50448e-102
	338	3.53912e-103	3.53912e-103
	339	1.86899e-104	1.86899e-104
	340	9.57394e-106	9.57394e-106
	341	4.75422e-107	4.75422e-107
	342	2.28711e-108	2.28711e-108
	343	1.06517e-109	1.06517e-109
	344	4.79905e-111	4.79905e-111
	345	2.0901e-112	2.0901e-112
	346	8.79224e-114	8.79224e-114
	347	3.56928e-115	3.56928e-115
	348	1.39705e-116	1.39705e-116
	349	5.26712e-118	5.26712e-118
	350	1.91079e-119	1.91079e-119
	351	6.66272e-121	6.66272e-121
	352	2.23035e-122	2.23035e-122
	353	7.15858e-124	7.15858e-124
	354	2.19997e-125	2.19997e-125
	355	6.46404e-127	6.46404e-127
	356	1.81298e-128	1.81298e-128
	357	4.84545e-130	4.84545e-130
	358	1.2317e-131	1.2317e-131
	359	2.97173e-133	2.97173e-133
	360	6.7899e-135	6.7899e-135
	361	1.46549e-136	1.46549e-136
	362	2.97964e-138	2.97964e-138
	363	5.6894e-140	5.6894e-140
	364	1.01668e-141	1.01668e-141
	365	1.69366e-143	1.69366e-143
	366	2.6185e-145	2.6185e-145
	367	3.73805e-147	3.73805e-147
	368	4.89812e-149	4.89812e-149
	369	5.85033e-151	5.85033e-151
	370	6.31676e-153	6.31676e-153
	371	6.10394e-155	6.10394e-155
	372	5.21354e-157	5.21354e-157
	373	3.87457e-159	3.87457e-159
	374	2.45432e-161	2.45432e-161
	375	1.28832e-163	1.28832e-163
	376	5.37983e-166	5.37983e-166
	377	1.67549e-168	1.67549e-168
	378	3.45935e-171	3.45935e-171
	379	3.55129e-174	3.55129e-174
	380
	381
	382
	383
	384
	385
	386
	387
	388
	389
	390
	391
	392
	393
	394
	395
	396
	397
	398
	399
	400
	401
	402
	403
	404
	405
	406
	407
	408
	409
	410
	411
	412
	413
	414
	415
	416
	417
	418
	419
	420
	421
	422
	423
	424
	425
	426
	427
	428
	429
	430
	431
	432
	433
	434
	435
	436
	437
	438
	439
	440
	441
	442
	443
	444
	445
	446
	447
	448
	449
	450
	451
	452
	453
	454
	455
	456
	457
	458
	459
	460
	461
	462
	463
	464
	465
	466
	467
	468
	469
	470
	471
	472
	473
	474
	475
	476
	477
	478
	479
	480
	481
	482
	483
	484
	485
	486
	487
	488
	489
	490
	491
	492
	493
	494
	495
	496
	497
	498
	499
	500

## Sheet: 3.2
This spreadsheet performs Fisher's exact test for a 2x2 table.
For more information, see http://udel.edu/~mcdonald/statfishers.html.
The spreadsheet comes with the Adh data from that web page entered as an example.
To use it, replace the Adh data with your numbers.
The smaller column total must be less than 500.
	P-value:	1
	LIVE	DIE	SUM	row totals
Wild type diploid	1101	107	1208	1208
wtf68Δ/wtf68Δ	482	46	528	528
column totals	1583	153		1736
	column 1	column 2		row totals
row 1	46	482		528
row 2	107	1101		1208
column totals	153	1583		1736
smaller column	46	107	153	0.0731278
	0	3.42653e-26	3.42653e-26
	1	2.6213e-24	2.6213e-24
	2	9.93266e-23	9.93266e-23
	3	2.48554e-21	2.48554e-21
	4	4.62079e-20	4.62079e-20
	5	6.80703e-19	6.80703e-19
	6	8.27665e-18	8.27665e-18
	7	8.54319e-17	8.54319e-17
	8	7.64165e-16	7.64165e-16
	9	6.01692e-15	6.01692e-15
	10	4.22235e-14	4.22235e-14
	11	2.66729e-13	2.66729e-13
	12	1.52934e-12	1.52934e-12
	13	8.01416e-12	8.01416e-12
	14	3.86089e-11	3.86089e-11
	15	1.71866e-10	1.71866e-10
	16	7.10031e-10	7.10031e-10
	17	2.7329e-09	2.7329e-09
	18	9.83358e-09	9.83358e-09
	19	3.31786e-08	3.31786e-08
	20	1.05255e-07	1.05255e-07
	21	3.14721e-07	3.14721e-07
	22	8.88933e-07	8.88933e-07
	23	2.37654e-06	2.37654e-06
	24	6.02485e-06	6.02485e-06
	25	1.45078e-05	1.45078e-05
	26	3.32339e-05	3.32339e-05
	27	7.25268e-05	7.25268e-05
	28	0.00015098	0.00015098
	29	0.000300174	0.000300174
	30	0.000570616	0.000570616
	31	0.00103821	0.00103821
	32	0.00180977	0.00180977
	33	0.00302516	0.00302516
	34	0.00485319	0.00485319
	35	0.00747837	0.00747837
	36	0.0110767	0.0110767
	37	0.015781	0.015781
	38	0.0216407	0.0216407
	39	0.0285814	0.0285814
	40	0.0363766	0.0363766
	41	0.0446402	0.0446402
	42	0.0528466	0.0528466
	43	0.0603818	0.0603818
	44	0.0666177	0.0666177
	45	0.0709997	0.0709997
	46	0.0731278	0.0731278
	47	0.0728172	0.0728172
	48	0.0701242	0.0701242
	49	0.0653331	0.0653331
	50	0.0589074	0.0589074
	51	0.0514173	0.0514173
	52	0.0434588	0.0434588
	53	0.0355787	0.0355787
	54	0.0282201	0.0282201
	55	0.0216913	0.0216913
	56	0.0161611	0.0161611
	57	0.0116736	0.0116736
	58	0.00817663	0.00817663
	59	0.00555467	0.00555467
	60	0.00366044	0.00366044
	61	0.00234028	0.00234028
	62	0.00145187	0.00145187
	63	0.000874123	0.000874123
	64	0.000510809	0.000510809
	65	0.000289758	0.000289758
	66	0.000159569	0.000159569
	67	8.53183e-05	8.53183e-05
	68	4.42948e-05	4.42948e-05
	69	2.23313e-05	2.23313e-05
	70	1.09334e-05	1.09334e-05
	71	5.1988e-06	5.1988e-06
	72	2.40091e-06	2.40091e-06
	73	1.07695e-06	1.07695e-06
	74	4.69213e-07	4.69213e-07
	75	1.9857e-07	1.9857e-07
	76	8.16262e-08	8.16262e-08
	77	3.25928e-08	3.25928e-08
	78	1.26412e-08	1.26412e-08
	79	4.76235e-09	4.76235e-09
	80	1.74266e-09	1.74266e-09
	81	6.19371e-10	6.19371e-10
	82	2.13804e-10	2.13804e-10
	83	7.16786e-11	7.16786e-11
	84	2.3337e-11	2.3337e-11
	85	7.37824e-12	7.37824e-12
	86	2.26507e-12	2.26507e-12
	87	6.75139e-13	6.75139e-13
	88	1.95365e-13	1.95365e-13
	89	5.48778e-14	5.48778e-14
	90	1.49621e-14	1.49621e-14
	91	3.95897e-15	3.95897e-15
	92	1.01649e-15	1.01649e-15
	93	2.53218e-16	2.53218e-16
	94	6.1191e-17	6.1191e-17
	95	1.43419e-17	1.43419e-17
	96	3.2597e-18	3.2597e-18
	97	7.1831e-19	7.1831e-19
	98	1.53434e-19	1.53434e-19
	99	3.17623e-20	3.17623e-20
	100	6.37061e-21	6.37061e-21
	101	1.23772e-21	1.23772e-21
	102	2.32873e-22	2.32873e-22
	103	4.24183e-23	4.24183e-23
	104	7.47817e-24	7.47817e-24
	105	1.27559e-24	1.27559e-24
	106	2.10452e-25	2.10452e-25
	107	3.35717e-26	3.35717e-26
	108	5.17619e-27	5.17619e-27
	109	7.71068e-28	7.71068e-28
	110	1.10928e-28	1.10928e-28
	111	1.54051e-29	1.54051e-29
	112	2.06424e-30	2.06424e-30
	113	2.66757e-31	2.66757e-31
	114	3.32281e-32	3.32281e-32
	115	3.98737e-33	3.98737e-33
	116	4.60686e-34	4.60686e-34
	117	5.12142e-35	5.12142e-35
	118	5.47463e-36	5.47463e-36
	119	5.6233e-37	5.6233e-37
	120	5.54593e-38	5.54593e-38
	121	5.24754e-39	5.24754e-39
	122	4.75953e-40	4.75953e-40
	123	4.13429e-41	4.13429e-41
	124	3.43591e-42	3.43591e-42
	125	2.72916e-43	2.72916e-43
	126	2.06953e-44	2.06953e-44
	127	1.49638e-45	1.49638e-45
	128	1.0303e-46	1.0303e-46
	129	6.74563e-48	6.74563e-48
	130	4.19319e-49	4.19319e-49
	131	2.47058e-50	2.47058e-50
	132	1.37717e-51	1.37717e-51
	133	7.24828e-53	7.24828e-53
	134	3.59398e-54	3.59398e-54
	135	1.67473e-55	1.67473e-55
	136	7.31406e-57	7.31406e-57
	137	2.98467e-58	2.98467e-58
	138	1.13416e-59	1.13416e-59
	139	3.99771e-61	3.99771e-61
	140	1.30135e-62	1.30135e-62
	141	3.8924e-64	3.8924e-64
	142	1.06347e-65	1.06347e-65
	143	2.63581e-67	2.63581e-67
	144	5.87751e-69	5.87751e-69
	145	1.16739e-70	1.16739e-70
	146	2.03991e-72	2.03991e-72
	147	3.0871e-74	3.0871e-74
	148	3.96368e-76	3.96368e-76
	149	4.19798e-78	4.19798e-78
	150	3.52096e-80	3.52096e-80
	151	2.19255e-82	2.19255e-82
	152	9.01094e-85	9.01094e-85
	153	1.83316e-87	1.83316e-87
	154
	155
	156
	157
	158
	159
	160
	161
	162
	163
	164
	165
	166
	167
	168
	169
	170
	171
	172
	173
	174
	175
	176
	177
	178
	179
	180
	181
	182
	183
	184
	185
	186
	187
	188
	189
	190
	191
	192
	193
	194
	195
	196
	197
	198
	199
	200
	201
	202
	203
	204
	205
	206
	207
	208
	209
	210
	211
	212
	213
	214
	215
	216
	217
	218
	219
	220
	221
	222
	223
	224
	225
	226
	227
	228
	229
	230
	231
	232
	233
	234
	235
	236
	237
	238
	239
	240
	241
	242
	243
	244
	245
	246
	247
	248
	249
	250
	251
	252
	253
	254
	255
	256
	257
	258
	259
	260
	261
	262
	263
	264
	265
	266
	267
	268
	269
	270
	271
	272
	273
	274
	275
	276
	277
	278
	279
	280
	281
	282
	283
	284
	285
	286
	287
	288
	289
	290
	291
	292
	293
	294
	295
	296
	297
	298
	299
	300
	301
	302
	303
	304
	305
	306
	307
	308
	309
	310
	311
	312
	313
	314
	315
	316
	317
	318
	319
	320
	321
	322
	323
	324
	325
	326
	327
	328
	329
	330
	331
	332
	333
	334
	335
	336
	337
	338
	339
	340
	341
	342
	343
	344
	345
	346
	347
	348
	349
	350
	351
	352
	353
	354
	355
	356
	357
	358
	359
	360
	361
	362
	363
	364
	365
	366
	367
	368
	369
	370
	371
	372
	373
	374
	375
	376
	377
	378
	379
	380
	381
	382
	383
	384
	385
	386
	387
	388
	389
	390
	391
	392
	393
	394
	395
	396
	397
	398
	399
	400
	401
	402
	403
	404
	405
	406
	407
	408
	409
	410
	411
	412
	413
	414
	415
	416
	417
	418
	419
	420
	421
	422
	423
	424
	425
	426
	427
	428
	429
	430
	431
	432
	433
	434
	435
	436
	437
	438
	439
	440
	441
	442
	443
	444
	445
	446
	447
	448
	449
	450
	451
	452
	453
	454
	455
	456
	457
	458
	459
	460
	461
	462
	463
	464
	465
	466
	467
	468
	469
	470
	471
	472
	473
	474
	475
	476
	477
	478
	479
	480
	481
	482
	483
	484
	485
	486
	487
	488
	489
	490
	491
	492
	493
	494
	495
	496
	497
	498
	499
	500

## Sheet: 4.1
This spreadsheet performs Fisher's exact test for a 2x2 table.
For more information, see http://udel.edu/~mcdonald/statfishers.html.
The spreadsheet comes with the Adh data from that web page entered as an example.
To use it, replace the Adh data with your numbers.
The smaller column total must be less than 500.
	P-value:	1.16013e-25
	LIVE	DIE	SUM	row totals
Wild type diploid	1101	107	1208	1208
wtf33Δ/wtf33+	638	226	864	864
column totals	1739	333		2072
	column 1	column 2		row totals
row 1	226	638		864
row 2	107	1101		1208
column totals	333	1739		2072
smaller column	226	107	333	4.3852e-26
	0	1.71078e-88	1.71078e-88
	1	5.61887e-86	5.61887e-86
	2	9.17843e-84	9.17843e-84
	3	9.94233e-82	9.94233e-82
	4	8.03445e-80	8.03445e-80
	5	5.16652e-78	5.16652e-78
	6	2.75383e-76	2.75383e-76
	7	1.25143e-74	1.25143e-74
	8	4.94942e-73	4.94942e-73
	9	1.73068e-71	1.73068e-71
	10	5.41732e-70	5.41732e-70
	11	1.53327e-68	1.53327e-68
	12	3.95656e-67	3.95656e-67
	13	9.3736e-66	9.3736e-66
	14	2.05096e-64	2.05096e-64
	15	4.16567e-63	4.16567e-63
	16	7.889e-62	7.889e-62
	17	1.3985e-60	1.3985e-60
	18	2.32868e-59	2.32868e-59
	19	3.65342e-58	3.65342e-58
	20	5.41543e-57	5.41543e-57
	21	7.60313e-56	7.60313e-56
	22	1.01335e-54	1.01335e-54
	23	1.28478e-53	1.28478e-53
	24	1.55244e-52	1.55244e-52
	25	1.79089e-51	1.79089e-51
	26	1.97553e-50	1.97553e-50
	27	2.08687e-49	2.08687e-49
	28	2.11396e-48	2.11396e-48
	29	2.05607e-47	2.05607e-47
	30	1.92233e-46	1.92233e-46
	31	1.7296e-45	1.7296e-45
	32	1.49913e-44	1.49913e-44
	33	1.25294e-43	1.25294e-43
	34	1.01067e-42	1.01067e-42
	35	7.87499e-42	7.87499e-42
	36	5.93198e-41	5.93198e-41
	37	4.32305e-40	4.32305e-40
	38	3.05023e-39	3.05023e-39
	39	2.08509e-38	2.08509e-38
	40	1.3818e-37	1.3818e-37
	41	8.88301e-37	8.88301e-37
	42	5.54273e-36	5.54273e-36
	43	3.35875e-35	3.35875e-35
	44	1.97766e-34	1.97766e-34
	45	1.13204e-33	1.13204e-33
	46	6.30262e-33	6.30262e-33
	47	3.4145e-32	3.4145e-32
	48	1.80083e-31	1.80083e-31
	49	9.24995e-31	9.24995e-31
	50	4.62918e-30	4.62918e-30
	51	2.25805e-29	2.25805e-29
	52	1.07396e-28	1.07396e-28
	53	4.98228e-28	4.98228e-28
	54	2.25527e-27	2.25527e-27
	55	9.96418e-27	9.96418e-27
	56	4.2983e-26	4.2983e-26
	57	1.81091e-25
	58	7.45367e-25
	59	2.99805e-24
	60	1.17875e-23
	61	4.53144e-23
	62	1.70368e-22
	63	6.26598e-22
	64	2.25497e-21
	65	7.9422e-21
	66	2.73835e-20
	67	9.24437e-20
	68	3.05631e-19
	69	9.89771e-19
	70	3.14033e-18
	71	9.76344e-18
	72	2.97505e-17
	73	8.88647e-17
	74	2.60244e-16
	75	7.47348e-16
	76	2.10487e-15
	77	5.8151e-15
	78	1.5761e-14
	79	4.19152e-14
	80	1.09391e-13
	81	2.80205e-13
	82	7.0455e-13
	83	1.7392e-12
	84	4.21543e-12
	85	1.00333e-11
	86	2.34538e-11
	87	5.38512e-11
	88	1.21463e-10
	89	2.69155e-10
	90	5.86037e-10
	91	1.25387e-09
	92	2.63654e-09
	93	5.44892e-09
	94	1.10694e-08
	95	2.21064e-08
	96	4.34041e-08
	97	8.37919e-08
	98	1.59063e-07
	99	2.96943e-07
	100	5.45187e-07
	101	9.84518e-07
	102	1.74881e-06
	103	3.05585e-06
	104	5.25326e-06
	105	8.8851e-06
	106	1.47865e-05
	107	2.42139e-05
	108	3.90203e-05
	109	6.18833e-05
	110	9.65917e-05
	111	0.000148394
	112	0.000224403
	113	0.000334044
	114	0.000489514
	115	0.000706216
	116	0.0010031
	117	0.00140284
	118	0.00193175
	119	0.00261936
	120	0.00349752
	121	0.00459905
	122	0.00595577
	123	0.00759607
	124	0.009542
	125	0.0118061
	126	0.0143883
	127	0.0172729
	128	0.0204263
	129	0.0237957
	130	0.027309
	131	0.0308765
	132	0.0343938
	133	0.0377464
	134	0.0408157
	135	0.0434858
	136	0.045651
	137	0.0472223
	138	0.0481337
	139	0.0483468
	140	0.0478534
	141	0.0466763
	142	0.0448669
	143	0.0425024
	144	0.0396794
	145	0.0365083
	146	0.0331054
	147	0.0295868
	148	0.0260611
	149	0.0226251
	150	0.0193597
	151	0.0163277
	152	0.0135729
	153	0.011121
	154	0.00898155
	155	0.0071498
	156	0.00561018
	157	0.00433914
	158	0.0033081
	159	0.00248601
	160	0.00184154
	161	0.00134467
	162	0.000967843
	163	0.000686678
	164	0.000480242
	165	0.000331076
	166	0.000224986
	167	0.00015071
	168	9.95155e-05
	169	6.47734e-05
	170	4.15585e-05
	171	2.62833e-05
	172	1.63852e-05
	173	1.00688e-05
	174	6.09888e-06
	175	3.64141e-06
	176	2.14304e-06
	177	1.24317e-06
	178	7.10824e-07
	179	4.00612e-07
	180	2.22541e-07
	181	1.21847e-07
	182	6.57557e-08
	183	3.4975e-08
	184	1.83351e-08
	185	9.47328e-09
	186	4.82396e-09
	187	2.42094e-09
	188	1.19739e-09
	189	5.83641e-10
	190	2.80356e-10
	191	1.32713e-10
	192	6.19088e-11
	193	2.84585e-11
	194	1.28909e-11
	195	5.7538e-12
	196	2.53055e-12
	197	1.0966e-12
	198	4.6822e-13
	199	1.9697e-13
	200	8.16373e-14
	201	3.3335e-14
	202	1.34097e-14
	203	5.31416e-15
	204	2.07457e-15
	205	7.97782e-16
	206	3.02194e-16
	207	1.12751e-16
	208	4.14346e-17
	209	1.49969e-17
	210	5.34583e-18
	211	1.87666e-18
	212	6.48773e-19
	213	2.2086e-19
	214	7.40352e-20
	215	2.44362e-20
	216	7.94112e-21
	217	2.54074e-21
	218	8.00287e-22
	219	2.4815e-22
	220	7.5743e-23
	221	2.27564e-23
	222	6.72935e-24
	223	1.9585e-24
	224	5.60957e-25
	225	1.5811e-25
	226	4.3852e-26	4.3852e-26
	227	1.1967e-26	1.1967e-26
	228	3.21308e-27	3.21308e-27
	229	8.48717e-28	8.48717e-28
	230	2.20536e-28	2.20536e-28
	231	5.63689e-29	5.63689e-29
	232	1.41712e-29	1.41712e-29
	233	3.50389e-30	3.50389e-30
	234	8.51986e-31	8.51986e-31
	235	2.03712e-31	2.03712e-31
	236	4.78926e-32	4.78926e-32
	237	1.107e-32	1.107e-32
	238	2.51543e-33	2.51543e-33
	239	5.6186e-34	5.6186e-34
	240	1.23353e-34	1.23353e-34
	241	2.66156e-35	2.66156e-35
	242	5.64343e-36	5.64343e-36
	243	1.17578e-36	1.17578e-36
	244	2.40681e-37	2.40681e-37
	245	4.83993e-38	4.83993e-38
	246	9.56029e-39	9.56029e-39
	247	1.85477e-39	1.85477e-39
	248	3.53379e-40	3.53379e-40
	249	6.61112e-41	6.61112e-41
	250	1.21433e-41	1.21433e-41
	251	2.18963e-42	2.18963e-42
	252	3.87544e-43	3.87544e-43
	253	6.73175e-44	6.73175e-44
	254	1.14744e-44	1.14744e-44
	255	1.91898e-45	1.91898e-45
	256	3.14832e-46	3.14832e-46
	257	5.06634e-47	5.06634e-47
	258	7.99552e-48	7.99552e-48
	259	1.23728e-48	1.23728e-48
	260	1.87709e-49	1.87709e-49
	261	2.79143e-50	2.79143e-50
	262	4.06832e-51	4.06832e-51
	263	5.80994e-52	5.80994e-52
	264	8.12861e-53	8.12861e-53
	265	1.11395e-53	1.11395e-53
	266	1.49498e-54	1.49498e-54
	267	1.96441e-55	1.96441e-55
	268	2.5268e-56	2.5268e-56
	269	3.18091e-57	3.18091e-57
	270	3.91814e-58	3.91814e-58
	271	4.7212e-59	4.7212e-59
	272	5.56374e-60	5.56374e-60
	273	6.41082e-61	6.41082e-61
	274	7.22074e-62	7.22074e-62
	275	7.94795e-63	7.94795e-63
	276	8.54701e-64	8.54701e-64
	277	8.97706e-65	8.97706e-65
	278	9.20632e-66	9.20632e-66
	279	9.21587e-67	9.21587e-67
	280	9.00214e-68	9.00214e-68
	281	8.57769e-69	8.57769e-69
	282	7.97003e-70	7.97003e-70
	283	7.21869e-71	7.21869e-71
	284	6.37092e-72	6.37092e-72
	285	5.47676e-73	5.47676e-73
	286	4.58401e-74	4.58401e-74
	287	3.73407e-75	3.73407e-75
	288	2.959e-76	2.959e-76
	289	2.27997e-77	2.27997e-77
	290	1.70736e-78	1.70736e-78
	291	1.24198e-79	1.24198e-79
	292	8.7713e-81	8.7713e-81
	293	6.01082e-82	6.01082e-82
	294	3.99455e-83	3.99455e-83
	295	2.57276e-84	2.57276e-84
	296	1.6049e-85	1.6049e-85
	297	9.68975e-87	9.68975e-87
	298	5.65827e-88	5.65827e-88
	299	3.19322e-89	3.19322e-89
	300	1.74019e-90	1.74019e-90
	301	9.14991e-92	9.14991e-92
	302	4.63758e-93	4.63758e-93
	303	2.26361e-94	2.26361e-94
	304	1.06291e-95	1.06291e-95
	305	4.79626e-97	4.79626e-97
	306	2.07731e-98	2.07731e-98
	307	8.62468e-100	8.62468e-100
	308	3.42796e-101	3.42796e-101
	309	1.30239e-102	1.30239e-102
	310	4.72242e-104	4.72242e-104
	311	1.63139e-105	1.63139e-105
	312	5.3592e-107	5.3592e-107
	313	1.6707e-108	1.6707e-108
	314	4.93137e-110	4.93137e-110
	315	1.37476e-111	1.37476e-111
	316	3.60971e-113	3.60971e-113
	317	8.89952e-115	8.89952e-115
	318	2.05308e-116	2.05308e-116
	319	4.41464e-118	4.41464e-118
	320	8.8085e-120	8.8085e-120
	321	1.62259e-121	1.62259e-121
	322	2.74308e-123	2.74308e-123
	323	4.22641e-125	4.22641e-125
	324	5.88579e-127	5.88579e-127
	325	7.3346e-129	7.3346e-129
	326	8.07782e-131	8.07782e-131
	327	7.73967e-133	7.73967e-133
	328	6.31988e-135	6.31988e-135
	329	4.27584e-137	4.27584e-137
	330	2.30109e-139	2.30109e-139
	331	9.23466e-142	9.23466e-142
	332	2.45659e-144	2.45659e-144
	333	3.24888e-147	3.24888e-147
	334
	335
	336
	337
	338
	339
	340
	341
	342
	343
	344
	345
	346
	347
	348
	349
	350
	351
	352
	353
	354
	355
	356
	357
	358
	359
	360
	361
	362
	363
	364
	365
	366
	367
	368
	369
	370
	371
	372
	373
	374
	375
	376
	377
	378
	379
	380
	381
	382
	383
	384
	385
	386
	387
	388
	389
	390
	391
	392
	393
	394
	395
	396
	397
	398
	399
	400
	401
	402
	403
	404
	405
	406
	407
	408
	409
	410
	411
	412
	413
	414
	415
	416
	417
	418
	419
	420
	421
	422
	423
	424
	425
	426
	427
	428
	429
	430
	431
	432
	433
	434
	435
	436
	437
	438
	439
	440
	441
	442
	443
	444
	445
	446
	447
	448
	449
	450
	451
	452
	453
	454
	455
	456
	457
	458
	459
	460
	461
	462
	463
	464
	465
	466
	467
	468
	469
	470
	471
	472
	473
	474
	475
	476
	477
	478
	479
	480
	481
	482
	483
	484
	485
	486
	487
	488
	489
	490
	491
	492
	493
	494
	495
	496
	497
	498
	499
	500

## Sheet: 4.2
This spreadsheet performs Fisher's exact test for a 2x2 table.
For more information, see http://udel.edu/~mcdonald/statfishers.html.
The spreadsheet comes with the Adh data from that web page entered as an example.
To use it, replace the Adh data with your numbers.
The smaller column total must be less than 500.
	P-value:	0.525304
	LIVE	DIE	SUM	row totals
Wild type diploid	1101	107	1208	1208
wtf33Δ/wtf33Δ	469	51	520	520
column totals	1570	158		1728
	column 1	column 2		row totals
row 1	51	469		520
row 2	107	1101		1208
column totals	158	1570		1728
smaller column	51	107	158	0.058602
	0	9.65121e-27	9.65121e-27
	1	7.54466e-25	7.54466e-25
	2	2.92187e-23	2.92187e-23
	3	7.47421e-22	7.47421e-22
	4	1.42065e-20	1.42065e-20
	5	2.1401e-19	2.1401e-19
	6	2.66145e-18	2.66145e-18
	7	2.8103e-17	2.8103e-17
	8	2.572e-16	2.572e-16
	9	2.0725e-15	2.0725e-15
	10	1.48866e-14	1.48866e-14
	11	9.62762e-14	9.62762e-14
	12	5.6526e-13	5.6526e-13
	13	3.03381e-12	3.03381e-12
	14	1.49725e-11	1.49725e-11
	15	6.82915e-11	6.82915e-11
	16	2.89146e-10	2.89146e-10
	17	1.14083e-09	1.14083e-09
	18	4.20887e-09	4.20887e-09
	19	1.45635e-08	1.45635e-08
	20	4.7392e-08	4.7392e-08
	21	1.45394e-07	1.45394e-07
	22	4.21453e-07	4.21453e-07
	23	1.15662e-06	1.15662e-06
	24	3.01068e-06	3.01068e-06
	25	7.44564e-06	7.44564e-06
	26	1.75216e-05	1.75216e-05
	27	3.92912e-05	3.92912e-05
	28	8.40691e-05	8.40691e-05
	29	0.00017184	0.00017184
	30	0.000335932	0.000335932
	31	0.000628738	0.000628738
	32	0.00112773	0.00112773
	33	0.00194023	0.00194023
	34	0.00320468	0.00320468
	35	0.00508562	0.00508562
	36	0.00775995	0.00775995
	37	0.0113929	0.0113929
	38	0.0161047	0.0161047
	39	0.0219325	0.0219325
	40	0.0287935	0.0287935
	41	0.0364593	0.0364593
	42	0.0445511	0.0445511
	43	0.05256	0.05256
	44	0.0598965
	45	0.0659609
	46	0.0702248
	47	0.0723073
	48	0.0720316
	49	0.0694487
	50	0.0648259
	51	0.058602	0.058602
	52	0.0513197	0.0513197
	53	0.0435497	0.0435497
	54	0.0358202	0.0358202
	55	0.0285642	0.0285642
	56	0.0220887	0.0220887
	57	0.0165678	0.0165678
	58	0.0120559	0.0120559
	59	0.00851252	0.00851252
	60	0.00583338	0.00583338
	61	0.00388025	0.00388025
	62	0.00250581	0.00250581
	63	0.00157126	0.00157126
	64	0.000956805	0.000956805
	65	0.000565885	0.000565885
	66	0.000325098	0.000325098
	67	0.000181439	0.000181439
	68	9.83827e-05	9.83827e-05
	69	5.18347e-05	5.18347e-05
	70	2.65382e-05	2.65382e-05
	71	1.32039e-05	1.32039e-05
	72	6.38473e-06	6.38473e-06
	73	3.00066e-06	3.00066e-06
	74	1.37071e-06	1.37071e-06
	75	6.08619e-07	6.08619e-07
	76	2.62683e-07	2.62683e-07
	77	1.10208e-07	1.10208e-07
	78	4.49468e-08	4.49468e-08
	79	1.78193e-08	1.78193e-08
	80	6.86732e-09	6.86732e-09
	81	2.57269e-09	2.57269e-09
	82	9.36875e-10	9.36875e-10
	83	3.31636e-10	3.31636e-10
	84	1.14107e-10	1.14107e-10
	85	3.81606e-11	3.81606e-11
	86	1.24037e-11	1.24037e-11
	87	3.91826e-12	3.91826e-12
	88	1.20286e-12	1.20286e-12
	89	3.58825e-13	3.58825e-13
	90	1.04007e-13	1.04007e-13
	91	2.92895e-14	2.92895e-14
	92	8.0129e-15	8.0129e-15
	93	2.12936e-15	2.12936e-15
	94	5.49586e-16	5.49586e-16
	95	1.37751e-16	1.37751e-16
	96	3.35251e-17	3.35251e-17
	97	7.92122e-18	7.92122e-18
	98	1.81675e-18	1.81675e-18
	99	4.04392e-19	4.04392e-19
	100	8.73452e-20	8.73452e-20
	101	1.83029e-20	1.83029e-20
	102	3.72011e-21	3.72011e-21
	103	7.33253e-22	7.33253e-22
	104	1.40124e-22	1.40124e-22
	105	2.59555e-23	2.59555e-23
	106	4.65896e-24	4.65896e-24
	107	8.1017e-25	8.1017e-25
	108	1.36447e-25	1.36447e-25
	109	2.22495e-26	2.22495e-26
	110	3.51163e-27	3.51163e-27
	111	5.36264e-28	5.36264e-28
	112	7.92091e-29	7.92091e-29
	113	1.13119e-29	1.13119e-29
	114	1.56129e-30	1.56129e-30
	115	2.0818e-31	2.0818e-31
	116	2.68044e-32	2.68044e-32
	117	3.33104e-33	3.33104e-33
	118	3.99341e-34	3.99341e-34
	119	4.61603e-35	4.61603e-35
	120	5.14175e-36	5.14175e-36
	121	5.51584e-37	5.51584e-37
	122	5.69507e-38	5.69507e-38
	123	5.65564e-39	5.65564e-39
	124	5.39822e-40	5.39822e-40
	125	4.94853e-41	4.94853e-41
	126	4.35321e-42	4.35321e-42
	127	3.67177e-43	3.67177e-43
	128	2.96671e-44	2.96671e-44
	129	2.29392e-45	2.29392e-45
	130	1.69562e-46	1.69562e-46
	131	1.19682e-47	1.19682e-47
	132	8.05659e-49	8.05659e-49
	133	5.16559e-50	5.16559e-50
	134	3.15003e-51	3.15003e-51
	135	1.82415e-52	1.82415e-52
	136	1.00144e-53	1.00144e-53
	137	5.20246e-55	5.20246e-55
	138	2.5523e-56	2.5523e-56
	139	1.17985e-57	1.17985e-57
	140	5.12662e-59	5.12662e-59
	141	2.08812e-60	2.08812e-60
	142	7.94841e-62	7.94841e-62
	143	2.81783e-63	2.81783e-63
	144	9.2679e-65	9.2679e-65
	145	2.81554e-66	2.81554e-66
	146	7.86053e-68	7.86053e-68
	147	2.0049e-69	2.0049e-69
	148	4.63955e-71	4.63955e-71
	149	9.66081e-73	9.66081e-73
	150	1.79208e-74	1.79208e-74
	151	2.92502e-76	2.92502e-76
	152	4.13529e-78	4.13529e-78
	153	4.96075e-80	4.96075e-80
	154	4.90949e-82	4.90949e-82
	155	3.84821e-84	3.84821e-84
	156	2.23976e-86	2.23976e-86
	157	8.6045e-89	8.6045e-89
	158	1.63647e-91	1.63647e-91
	159
	160
	161
	162
	163
	164
	165
	166
	167
	168
	169
	170
	171
	172
	173
	174
	175
	176
	177
	178
	179
	180
	181
	182
	183
	184
	185
	186
	187
	188
	189
	190
	191
	192
	193
	194
	195
	196
	197
	198
	199
	200
	201
	202
	203
	204
	205
	206
	207
	208
	209
	210
	211
	212
	213
	214
	215
	216
	217
	218
	219
	220
	221
	222
	223
	224
	225
	226
	227
	228
	229
	230
	231
	232
	233
	234
	235
	236
	237
	238
	239
	240
	241
	242
	243
	244
	245
	246
	247
	248
	249
	250
	251
	252
	253
	254
	255
	256
	257
	258
	259
	260
	261
	262
	263
	264
	265
	266
	267
	268
	269
	270
	271
	272
	273
	274
	275
	276
	277
	278
	279
	280
	281
	282
	283
	284
	285
	286
	287
	288
	289
	290
	291
	292
	293
	294
	295
	296
	297
	298
	299
	300
	301
	302
	303
	304
	305
	306
	307
	308
	309
	310
	311
	312
	313
	314
	315
	316
	317
	318
	319
	320
	321
	322
	323
	324
	325
	326
	327
	328
	329
	330
	331
	332
	333
	334
	335
	336
	337
	338
	339
	340
	341
	342
	343
	344
	345
	346
	347
	348
	349
	350
	351
	352
	353
	354
	355
	356
	357
	358
	359
	360
	361
	362
	363
	364
	365
	366
	367
	368
	369
	370
	371
	372
	373
	374
	375
	376
	377
	378
	379
	380
	381
	382
	383
	384
	385
	386
	387
	388
	389
	390
	391
	392
	393
	394
	395
	396
	397
	398
	399
	400
	401
	402
	403
	404
	405
	406
	407
	408
	409
	410
	411
	412
	413
	414
	415
	416
	417
	418
	419
	420
	421
	422
	423
	424
	425
	426
	427
	428
	429
	430
	431
	432
	433
	434
	435
	436
	437
	438
	439
	440
	441
	442
	443
	444
	445
	446
	447
	448
	449
	450
	451
	452
	453
	454
	455
	456
	457
	458
	459
	460
	461
	462
	463
	464
	465
	466
	467
	468
	469
	470
	471
	472
	473
	474
	475
	476
	477
	478
	479
	480
	481
	482
	483
	484
	485
	486
	487
	488
	489
	490
	491
	492
	493
	494
	495
	496
	497
	498
	499
	500

## Sheet: 5.1
This spreadsheet performs Fisher's exact test for a 2x2 table.
For more information, see http://udel.edu/~mcdonald/statfishers.html.
The spreadsheet comes with the Adh data from that web page entered as an example.
To use it, replace the Adh data with your numbers.
The smaller column total must be less than 500.
	P-value:	0.166229
	LIVE	DIE	SUM	row totals
Wild type diploid	1101	107	1208	1208
wtf46Δ/wtf46+	606	74	680	680
column totals	1707	181		1888
	column 1	column 2		row totals
row 1	74	606		680
row 2	107	1101		1208
column totals	181	1707		1888
smaller column	74	107	181	0.0230793
	0	3.96493e-38	3.96493e-38
	1	4.74711e-36	4.74711e-36
	2	2.8192e-34	2.8192e-34
	3	1.10726e-32	1.10726e-32
	4	3.2355e-31	3.2355e-31
	5	7.50259e-30	7.50259e-30
	6	1.43806e-28	1.43806e-28
	7	2.34345e-27	2.34345e-27
	8	3.31428e-26	3.31428e-26
	9	4.1324e-25	4.1324e-25
	10	4.59912e-24	4.59912e-24
	11	4.61483e-23	4.61483e-23
	12	4.20953e-22	4.20953e-22
	13	3.51496e-21	3.51496e-21
	14	2.70257e-20	2.70257e-20
	15	1.92313e-19	1.92313e-19
	16	1.27214e-18	1.27214e-18
	17	7.85301e-18	7.85301e-18
	18	4.53947e-17	4.53947e-17
	19	2.46471e-16	2.46471e-16
	20	1.26039e-15	1.26039e-15
	21	6.08547e-15	6.08547e-15
	22	2.78036e-14	2.78036e-14
	23	1.2045e-13	1.2045e-13
	24	4.95697e-13	4.95697e-13
	25	1.94117e-12	1.94117e-12
	26	7.24482e-12	7.24482e-12
	27	2.58067e-11	2.58067e-11
	28	8.78529e-11	8.78529e-11
	29	2.86176e-10	2.86176e-10
	30	8.93021e-10	8.93021e-10
	31	2.67242e-09	2.67242e-09
	32	7.67706e-09	7.67706e-09
	33	2.11903e-08	2.11903e-08
	34	5.62481e-08	5.62481e-08
	35	1.43703e-07	1.43703e-07
	36	3.53624e-07	3.53624e-07
	37	8.38789e-07	8.38789e-07
	38	1.91908e-06	1.91908e-06
	39	4.23781e-06	4.23781e-06
	40	9.03783e-06	9.03783e-06
	41	1.86255e-05	1.86255e-05
	42	3.71116e-05	3.71116e-05
	43	7.15308e-05	7.15308e-05
	44	0.000133435	0.000133435
	45	0.000241013	0.000241013
	46	0.000421692	0.000421692
	47	0.000715016	0.000715016
	48	0.00117537	0.00117537
	49	0.00187385	0.00187385
	50	0.00289836	0.00289836
	51	0.00435086	0.00435086
	52	0.00634081	0.00634081
	53	0.00897417	0.00897417
	54	0.0123382	0.0123382
	55	0.0164832	0.0164832
	56	0.021403	0.021403
	57	0.0270187
	58	0.0331678
	59	0.0396032
	60	0.0460046
	61	0.052002
	62	0.05721
	63	0.0612689
	64	0.0638856
	65	0.0648684
	66	0.0641509
	67	0.0617983
	68	0.0579988
	69	0.0530382
	70	0.0472654
	71	0.0410521
	72	0.0347549
	73	0.0286834
	74	0.0230793	0.0230793
	75	0.0181066	0.0181066
	76	0.0138519	0.0138519
	77	0.0103342	0.0103342
	78	0.00751916	0.00751916
	79	0.00533606	0.00533606
	80	0.00369367	0.00369367
	81	0.00249405	0.00249405
	82	0.00164281	0.00164281
	83	0.00105566	0.00105566
	84	0.000661804	0.000661804
	85	0.000404784	0.000404784
	86	0.000241556	0.000241556
	87	0.000140645	0.000140645
	88	7.99004e-05	7.99004e-05
	89	4.42894e-05	4.42894e-05
	90	2.39541e-05	2.39541e-05
	91	1.26412e-05	1.26412e-05
	92	6.50922e-06	6.50922e-06
	93	3.27036e-06	3.27036e-06
	94	1.60318e-06	1.60318e-06
	95	7.66802e-07	7.66802e-07
	96	3.57838e-07	3.57838e-07
	97	1.62922e-07	1.62922e-07
	98	7.23685e-08	7.23685e-08
	99	3.13601e-08	3.13601e-08
	100	1.32569e-08	1.32569e-08
	101	5.46671e-09	5.46671e-09
	102	2.19887e-09	2.19887e-09
	103	8.62659e-10	8.62659e-10
	104	3.30076e-10	3.30076e-10
	105	1.23166e-10	1.23166e-10
	106	4.48164e-11	4.48164e-11
	107	1.59006e-11	1.59006e-11
	108	5.50022e-12	5.50022e-12
	109	1.85479e-12	1.85479e-12
	110	6.09691e-13	6.09691e-13
	111	1.95334e-13	1.95334e-13
	112	6.09882e-14	6.09882e-14
	113	1.8555e-14	1.8555e-14
	114	5.49999e-15	5.49999e-15
	115	1.58814e-15	1.58814e-15
	116	4.4666e-16	4.4666e-16
	117	1.22337e-16	1.22337e-16
	118	3.26256e-17	3.26256e-17
	119	8.4704e-18	8.4704e-18
	120	2.14049e-18	2.14049e-18
	121	5.26386e-19	5.26386e-19
	122	1.25947e-19	1.25947e-19
	123	2.93137e-20	2.93137e-20
	124	6.63525e-21	6.63525e-21
	125	1.46031e-21	1.46031e-21
	126	3.1241e-22	3.1241e-22
	127	6.49514e-23	6.49514e-23
	128	1.31194e-23	1.31194e-23
	129	2.57385e-24	2.57385e-24
	130	4.90299e-25	4.90299e-25
	131	9.06596e-26	9.06596e-26
	132	1.62667e-26	1.62667e-26
	133	2.83117e-27	2.83117e-27
	134	4.77812e-28	4.77812e-28
	135	7.81642e-29	7.81642e-29
	136	1.23892e-29	1.23892e-29
	137	1.90187e-30	1.90187e-30
	138	2.82637e-31	2.82637e-31
	139	4.06428e-32	4.06428e-32
	140	5.65238e-33	5.65238e-33
	141	7.59883e-34	7.59883e-34
	142	9.86944e-35	9.86944e-35
	143	1.23771e-35	1.23771e-35
	144	1.49781e-36	1.49781e-36
	145	1.74794e-37	1.74794e-37
	146	1.96577e-38	1.96577e-38
	147	2.12891e-39	2.12891e-39
	148	2.21852e-40	2.21852e-40
	149	2.22277e-41	2.22277e-41
	150	2.1393e-42	2.1393e-42
	151	1.976e-43	1.976e-43
	152	1.74987e-44	1.74987e-44
	153	1.48411e-45	1.48411e-45
	154	1.2041e-46	1.2041e-46
	155	9.3339e-48	9.3339e-48
	156	6.90378e-49	6.90378e-49
	157	4.86527e-50	4.86527e-50
	158	3.2617e-51	3.2617e-51
	159	2.07664e-52	2.07664e-52
	160	1.25329e-53	1.25329e-53
	161	7.15535e-55	7.15535e-55
	162	3.85595e-56	3.85595e-56
	163	1.9565e-57	1.9565e-57
	164	9.32153e-59	9.32153e-59
	165	4.15744e-60	4.15744e-60
	166	1.72983e-61	1.72983e-61
	167	6.68864e-63	6.68864e-63
	168	2.3928e-64	2.3928e-64
	169	7.87955e-66	7.87955e-66
	170	2.37444e-67	2.37444e-67
	171	6.50235e-69	6.50235e-69
	172	1.60487e-70	1.60487e-70
	173	3.53443e-72	3.53443e-72
	174	6.86002e-74	6.86002e-74
	175	1.15513e-75	1.15513e-75
	176	1.65309e-77	1.65309e-77
	177	1.95477e-79	1.95477e-79
	178	1.83365e-81	1.83365e-81
	179	1.27921e-83	1.27921e-83
	180	5.8997e-86	5.8997e-86
	181	1.34913e-88	1.34913e-88
	182
	183
	184
	185
	186
	187
	188
	189
	190
	191
	192
	193
	194
	195
	196
	197
	198
	199
	200
	201
	202
	203
	204
	205
	206
	207
	208
	209
	210
	211
	212
	213
	214
	215
	216
	217
	218
	219
	220
	221
	222
	223
	224
	225
	226
	227
	228
	229
	230
	231
	232
	233
	234
	235
	236
	237
	238
	239
	240
	241
	242
	243
	244
	245
	246
	247
	248
	249
	250
	251
	252
	253
	254
	255
	256
	257
	258
	259
	260
	261
	262
	263
	264
	265
	266
	267
	268
	269
	270
	271
	272
	273
	274
	275
	276
	277
	278
	279
	280
	281
	282
	283
	284
	285
	286
	287
	288
	289
	290
	291
	292
	293
	294
	295
	296
	297
	298
	299
	300
	301
	302
	303
	304
	305
	306
	307
	308
	309
	310
	311
	312
	313
	314
	315
	316
	317
	318
	319
	320
	321
	322
	323
	324
	325
	326
	327
	328
	329
	330
	331
	332
	333
	334
	335
	336
	337
	338
	339
	340
	341
	342
	343
	344
	345
	346
	347
	348
	349
	350
	351
	352
	353
	354
	355
	356
	357
	358
	359
	360
	361
	362
	363
	364
	365
	366
	367
	368
	369
	370
	371
	372
	373
	374
	375
	376
	377
	378
	379
	380
	381
	382
	383
	384
	385
	386
	387
	388
	389
	390
	391
	392
	393
	394
	395
	396
	397
	398
	399
	400
	401
	402
	403
	404
	405
	406
	407
	408
	409
	410
	411
	412
	413
	414
	415
	416
	417
	418
	419
	420
	421
	422
	423
	424
	425
	426
	427
	428
	429
	430
	431
	432
	433
	434
	435
	436
	437
	438
	439
	440
	441
	442
	443
	444
	445
	446
	447
	448
	449
	450
	451
	452
	453
	454
	455
	456
	457
	458
	459
	460
	461
	462
	463
	464
	465
	466
	467
	468
	469
	470
	471
	472
	473
	474
	475
	476
	477
	478
	479
	480
	481
	482
	483
	484
	485
	486
	487
	488
	489
	490
	491
	492
	493
	494
	495
	496
	497
	498
	499
	500

## Sheet: 5.2
This spreadsheet performs Fisher's exact test for a 2x2 table.
For more information, see http://udel.edu/~mcdonald/statfishers.html.
The spreadsheet comes with the Adh data from that web page entered as an example.
To use it, replace the Adh data with your numbers.
The smaller column total must be less than 500.
	P-value:	0.525304
	LIVE	DIE	SUM	row totals
Wild type diploid	1101	107	1208	1208
wtf46Δ/wtf46Δ	469	51	520	520
column totals	1570	158		1728
	column 1	column 2		row totals
row 1	51	469		520
row 2	107	1101		1208
column totals	158	1570		1728
smaller column	51	107	158	0.058602
	0	9.65121e-27	9.65121e-27
	1	7.54466e-25	7.54466e-25
	2	2.92187e-23	2.92187e-23
	3	7.47421e-22	7.47421e-22
	4	1.42065e-20	1.42065e-20
	5	2.1401e-19	2.1401e-19
	6	2.66145e-18	2.66145e-18
	7	2.8103e-17	2.8103e-17
	8	2.572e-16	2.572e-16
	9	2.0725e-15	2.0725e-15
	10	1.48866e-14	1.48866e-14
	11	9.62762e-14	9.62762e-14
	12	5.6526e-13	5.6526e-13
	13	3.03381e-12	3.03381e-12
	14	1.49725e-11	1.49725e-11
	15	6.82915e-11	6.82915e-11
	16	2.89146e-10	2.89146e-10
	17	1.14083e-09	1.14083e-09
	18	4.20887e-09	4.20887e-09
	19	1.45635e-08	1.45635e-08
	20	4.7392e-08	4.7392e-08
	21	1.45394e-07	1.45394e-07
	22	4.21453e-07	4.21453e-07
	23	1.15662e-06	1.15662e-06
	24	3.01068e-06	3.01068e-06
	25	7.44564e-06	7.44564e-06
	26	1.75216e-05	1.75216e-05
	27	3.92912e-05	3.92912e-05
	28	8.40691e-05	8.40691e-05
	29	0.00017184	0.00017184
	30	0.000335932	0.000335932
	31	0.000628738	0.000628738
	32	0.00112773	0.00112773
	33	0.00194023	0.00194023
	34	0.00320468	0.00320468
	35	0.00508562	0.00508562
	36	0.00775995	0.00775995
	37	0.0113929	0.0113929
	38	0.0161047	0.0161047
	39	0.0219325	0.0219325
	40	0.0287935	0.0287935
	41	0.0364593	0.0364593
	42	0.0445511	0.0445511
	43	0.05256	0.05256
	44	0.0598965
	45	0.0659609
	46	0.0702248
	47	0.0723073
	48	0.0720316
	49	0.0694487
	50	0.0648259
	51	0.058602	0.058602
	52	0.0513197	0.0513197
	53	0.0435497	0.0435497
	54	0.0358202	0.0358202
	55	0.0285642	0.0285642
	56	0.0220887	0.0220887
	57	0.0165678	0.0165678
	58	0.0120559	0.0120559
	59	0.00851252	0.00851252
	60	0.00583338	0.00583338
	61	0.00388025	0.00388025
	62	0.00250581	0.00250581
	63	0.00157126	0.00157126
	64	0.000956805	0.000956805
	65	0.000565885	0.000565885
	66	0.000325098	0.000325098
	67	0.000181439	0.000181439
	68	9.83827e-05	9.83827e-05
	69	5.18347e-05	5.18347e-05
	70	2.65382e-05	2.65382e-05
	71	1.32039e-05	1.32039e-05
	72	6.38473e-06	6.38473e-06
	73	3.00066e-06	3.00066e-06
	74	1.37071e-06	1.37071e-06
	75	6.08619e-07	6.08619e-07
	76	2.62683e-07	2.62683e-07
	77	1.10208e-07	1.10208e-07
	78	4.49468e-08	4.49468e-08
	79	1.78193e-08	1.78193e-08
	80	6.86732e-09	6.86732e-09
	81	2.57269e-09	2.57269e-09
	82	9.36875e-10	9.36875e-10
	83	3.31636e-10	3.31636e-10
	84	1.14107e-10	1.14107e-10
	85	3.81606e-11	3.81606e-11
	86	1.24037e-11	1.24037e-11
	87	3.91826e-12	3.91826e-12
	88	1.20286e-12	1.20286e-12
	89	3.58825e-13	3.58825e-13
	90	1.04007e-13	1.04007e-13
	91	2.92895e-14	2.92895e-14
	92	8.0129e-15	8.0129e-15
	93	2.12936e-15	2.12936e-15
	94	5.49586e-16	5.49586e-16
	95	1.37751e-16	1.37751e-16
	96	3.35251e-17	3.35251e-17
	97	7.92122e-18	7.92122e-18
	98	1.81675e-18	1.81675e-18
	99	4.04392e-19	4.04392e-19
	100	8.73452e-20	8.73452e-20
	101	1.83029e-20	1.83029e-20
	102	3.72011e-21	3.72011e-21
	103	7.33253e-22	7.33253e-22
	104	1.40124e-22	1.40124e-22
	105	2.59555e-23	2.59555e-23
	106	4.65896e-24	4.65896e-24
	107	8.1017e-25	8.1017e-25
	108	1.36447e-25	1.36447e-25
	109	2.22495e-26	2.22495e-26
	110	3.51163e-27	3.51163e-27
	111	5.36264e-28	5.36264e-28
	112	7.92091e-29	7.92091e-29
	113	1.13119e-29	1.13119e-29
	114	1.56129e-30	1.56129e-30
	115	2.0818e-31	2.0818e-31
	116	2.68044e-32	2.68044e-32
	117	3.33104e-33	3.33104e-33
	118	3.99341e-34	3.99341e-34
	119	4.61603e-35	4.61603e-35
	120	5.14175e-36	5.14175e-36
	121	5.51584e-37	5.51584e-37
	122	5.69507e-38	5.69507e-38
	123	5.65564e-39	5.65564e-39
	124	5.39822e-40	5.39822e-40
	125	4.94853e-41	4.94853e-41
	126	4.35321e-42	4.35321e-42
	127	3.67177e-43	3.67177e-43
	128	2.96671e-44	2.96671e-44
	129	2.29392e-45	2.29392e-45
	130	1.69562e-46	1.69562e-46
	131	1.19682e-47	1.19682e-47
	132	8.05659e-49	8.05659e-49
	133	5.16559e-50	5.16559e-50
	134	3.15003e-51	3.15003e-51
	135	1.82415e-52	1.82415e-52
	136	1.00144e-53	1.00144e-53
	137	5.20246e-55	5.20246e-55
	138	2.5523e-56	2.5523e-56
	139	1.17985e-57	1.17985e-57
	140	5.12662e-59	5.12662e-59
	141	2.08812e-60	2.08812e-60
	142	7.94841e-62	7.94841e-62
	143	2.81783e-63	2.81783e-63
	144	9.2679e-65	9.2679e-65
	145	2.81554e-66	2.81554e-66
	146	7.86053e-68	7.86053e-68
	147	2.0049e-69	2.0049e-69
	148	4.63955e-71	4.63955e-71
	149	9.66081e-73	9.66081e-73
	150	1.79208e-74	1.79208e-74
	151	2.92502e-76	2.92502e-76
	152	4.13529e-78	4.13529e-78
	153	4.96075e-80	4.96075e-80
	154	4.90949e-82	4.90949e-82
	155	3.84821e-84	3.84821e-84
	156	2.23976e-86	2.23976e-86
	157	8.6045e-89	8.6045e-89
	158	1.63647e-91	1.63647e-91
	159
	160
	161
	162
	163
	164
	165
	166
	167
	168
	169
	170
	171
	172
	173
	174
	175
	176
	177
	178
	179
	180
	181
	182
	183
	184
	185
	186
	187
	188
	189
	190
	191
	192
	193
	194
	195
	196
	197
	198
	199
	200
	201
	202
	203
	204
	205
	206
	207
	208
	209
	210
	211
	212
	213
	214
	215
	216
	217
	218
	219
	220
	221
	222
	223
	224
	225
	226
	227
	228
	229
	230
	231
	232
	233
	234
	235
	236
	237
	238
	239
	240
	241
	242
	243
	244
	245
	246
	247
	248
	249
	250
	251
	252
	253
	254
	255
	256
	257
	258
	259
	260
	261
	262
	263
	264
	265
	266
	267
	268
	269
	270
	271
	272
	273
	274
	275
	276
	277
	278
	279
	280
	281
	282
	283
	284
	285
	286
	287
	288
	289
	290
	291
	292
	293
	294
	295
	296
	297
	298
	299
	300
	301
	302
	303
	304
	305
	306
	307
	308
	309
	310
	311
	312
	313
	314
	315
	316
	317
	318
	319
	320
	321
	322
	323
	324
	325
	326
	327
	328
	329
	330
	331
	332
	333
	334
	335
	336
	337
	338
	339
	340
	341
	342
	343
	344
	345
	346
	347
	348
	349
	350
	351
	352
	353
	354
	355
	356
	357
	358
	359
	360
	361
	362
	363
	364
	365
	366
	367
	368
	369
	370
	371
	372
	373
	374
	375
	376
	377
	378
	379
	380
	381
	382
	383
	384
	385
	386
	387
	388
	389
	390
	391
	392
	393
	394
	395
	396
	397
	398
	399
	400
	401
	402
	403
	404
	405
	406
	407
	408
	409
	410
	411
	412
	413
	414
	415
	416
	417
	418
	419
	420
	421
	422
	423
	424
	425
	426
	427
	428
	429
	430
	431
	432
	433
	434
	435
	436
	437
	438
	439
	440
	441
	442
	443
	444
	445
	446
	447
	448
	449
	450
	451
	452
	453
	454
	455
	456
	457
	458
	459
	460
	461
	462
	463
	464
	465
	466
	467
	468
	469
	470
	471
	472
	473
	474
	475
	476
	477
	478
	479
	480
	481
	482
	483
	484
	485
	486
	487
	488
	489
	490
	491
	492
	493
	494
	495
	496
	497
	498
	499
	500

[truncated: 6 more sheets: 6.1, 6.2, 7.1, 7.2, 8.1, 8.2]
