# Supplementary material for: The wtf meiotic driver gene family has unexpectedly persisted for over 100 million years
Source: eLife. 2022 Oct 13;11:e81149. doi: 10.7554/eLife.81149 (PMC9562144; doi:10.7554/eLife.81149)
Supplement: Figure 9—figure supplement 1—source data 1. — Raw data file with spore viability of wtf68+/wtf68Δ heterozygous cross can be found in Table 1.1. Corresponding octad genotypes are found in Table 1.2. Spore viability data of homozygous diploid are in Table 2. Exact binomial test was performed in Table 3.1, and the Fisher’s exact test is calculated in Table 3.2. [file elife-81149-fig9-figsupp1-data1.xlsx]

## Sheet: 1.1_Heterozygous viability
Cross ID	Total octad	Successful octad	Total spore (In successful octad)	Viable spore (In successful octad)	Viable Marker-Resistance (In successful octad)	Viable Marker-Sensitive (In successful octad)	Note
DY47919 cross 1	11	11	88	59	19	40
DY47919 cross 2	9	9	72	56	20	36
DY47919 cross 3	11	11	88	69	26	43
DY47919 cross 4	11	11	88	62	20	42
DY47919 cross 5	11	11	88	54	18	36
DY47920 cross 1	11	11	88	66	24	42	For manuscript figure
DY47920 cross 2	10	10	80	53	20	33
DY47920 cross 3	11	11	88	56	27	29
DY47920 cross 4	11	11	88	48	17	31
DY47920 cross 5	10	10	80	53	21	32
	106	106	848	576	212	364
Total viability	67.9245
		Viable_MarkerR (deletion)	Total-Viable_MarkerR		MarkerR viability
		212	848		0.25
		Viable-Viable_MarkerR (WT)	Total-(Viable-Viable_MarkerR)		MarkerS viability
		364	484		0.429245
					wtf68Δ	wtf68+
				spores that are viable and with the indicated genotype	25	42.9245

## Sheet: 1.2_Octad_genotyping
	4R4S	4R3S	3R4S	4R2S	2R4S	3R3S	4R1S	1R4S	3R2S	2R3S	3R1S	1R3S	2R2S	4R0S	0R4S	<= 3 viable spore	total
DY47919 cross 1		1	1		4	1									3	1	11
DY47919 cross 2			3		5			1									9
DY47919 cross 3	3	1	1		2			3							1		11
DY47919 cross 4			4		3			1							2	1	11
DY47919 cross 5			1		3			1		2		1	1			2	11
DY47920 cross 1	1	1	4					2		1					2		11
DY47920 cross 2	1	2			1	1		1				1			1	2	10
DY47920 cross 3	2		1		3				1	1						3	11
DY47920 cross 4		1			3			1		1		1	1			3	11
DY47920 cross 5	2		2		2										1	3	10
	9	6	17	0	26	2	0	10	1	5	0	3	2	0	10	15	106
Genotype	4R4S	4R3S	3R4S	4R2S	2R4S	3R3S	4R1S	1R4S	3R2S	2R3S	3R1S	1R3S	2R2S	4R0S	0R4S	<= 3 viable spore
Number	9	6	17	0	26	2	0	10	1	5	0	3	2	0	10	15

## Sheet: 2_Homozygous viability
Cross ID	Total octad	Successful octad	Total spore (In successful octad)	Viable spore (In successful octad)	Viable Marker-Resistance (In successful octad)	Viable Marker-Sensitive (In successful octad)
DY47919 × DY47920 -1	11	11	88	88	88	0
DY47919 × DY47920 -2	11	11	88	86	86	0
DY47919 × DY47920 -3	11	11	88	83	83	0
DY47919 × DY47920 -4	11	11	88	72	72	0
DY47919 × DY47920 -5	11	11	88	72	72	0
DY47919 × DY47920 -6	11	11	88	81	81	0
	66	66	528	482	482	0
Total viability	91.2879

## Sheet: 3.1_exact binomial test
This spreadsheet performs the exact binomial test of goodness-of-fit.
It comes with the wasp data from http://www.biostathandbook.com/exactgof.html entered as an example.
To use it, replace the wasp data with your observed numbers, and replace the wasp ratio (1:1) with your expected ratio.
The expected ratio can be any numbers you want, as long as the ratio is correct.
For example, if you've done a genetic cross with an expected 3:1 ratio, you could enter 3 and 1, or 0.75 and 0.25, or 75 and 25.
The result in column F is the P-value for a two-tailed test, which is almost always what you want.
The result in column G is the P-value for a one-tailed test, which is almost never what you want.
For more details see http://www.biostathandbook.com/exactgof.html
	observed numbers	expected proportions		expected numbers	P-value (two-tailed)	P-value (one tailed)		n	p	q	exp 1	exp2	point prob
wtf68+	364	1		288	2.48856e-10	1.24428e-10		576	0.5	0.5	288	288	5.28643e-11
wtf68Δ	212	1		288				0
								1.24428e-10
								1.24428e-10
	observed numbers	expected proportions		expected numbers	P-value (two-tailed)	P-value (one tailed)		n	p	q	exp 1	exp2	point prob
4R3S octad	6	1		11.5	0.0346897	0.0173448		23	0.5	0.5	11.5	11.5
3R4S octad	17	1		11.5
	observed numbers	expected proportions		expected numbers	P-value (two-tailed)	P-value (one tailed)		n	p	q	exp 1	exp2	point prob
4R2S octad	0	1		13	2.98023e-08	1.49012e-08		26	0.5	0.5	13	13
2R4S octad	26	1		13
	observed numbers	expected proportions		expected numbers	P-value (two-tailed)	P-value (one tailed)		n	p	q	exp 1	exp2	point prob
4R1S octad	0	1		5	0.00195312	0.000976562		10	0.5	0.5	5	5
1R4S octad	10	1		5
	observed numbers	expected proportions		expected numbers	P-value (two-tailed)	P-value (one tailed)		n	p	q	exp 1	exp2	point prob
4R0S octad	0	1		5	0.00195312	0.000976562		10	0.5	0.5	5	5
0R4S octad	10	1		5
									0	50	100	150	200	250	300	350	400	450	500	550	600	650	700	750	800	850	900	950	1000
								0	4.04317e-174	1.56129e-101	5.14169e-60	4.42591e-32	4.74506e-14	0	0	0	1.35815e-21	4.1858e-44	7.48138e-78	3.33691e-129	0	0	0	0	0	0	0	0	0
								1	2.32887e-171	1.61028e-100	2.42321e-59	1.24863e-31	8.87634e-14	0	0	0	5.96097e-22	1.16942e-44	1.1349e-78	1.57459e-130	0	0	0	0	0	0	0	0	0
								2	6.6955e-169	1.62576e-99	1.12846e-58	3.49125e-31	1.64784e-13	0	0	0	2.59495e-22	3.23403e-45	1.69557e-79	7.13128e-132	0	0	0	0	0	0	0	0	0
								3	1.28107e-166	1.60736e-98	5.1931e-58	9.67508e-31	3.03591e-13	0	0	0	1.1204e-22	8.85252e-46	2.49447e-80	3.09495e-133	0	0	0	0	0	0	0	0	0
								4	1.83514e-164	1.55675e-97	2.36186e-57	2.65751e-30	5.55096e-13	0	0	0	4.79775e-23	2.39837e-46	3.61303e-81	1.28491e-134	0	0	0	0	0	0	0	0	0
								5	2.09939e-162	1.4775e-96	1.06171e-56	7.23528e-30	1.0073e-12	0	0	0	2.03756e-23	6.4308e-47	5.15124e-82	5.09333e-136	0	0	0	0	0	0	0	0	0
								6	1.99792e-160	1.3746e-95	4.71761e-56	1.9526e-29	1.81411e-12	0	0	0	8.58186e-24	1.70642e-47	7.22803e-83	1.92374e-137	0	0	0	0	0	0	0	0	0
								7	1.62688e-158	1.25402e-94	2.07222e-55	5.22351e-29	3.24261e-12	0	0	0	3.58456e-24	4.48075e-48	9.97953e-84	6.9075e-139	0	0	0	0	0	0	0	0	0
								8	1.15712e-156	1.12214e-93	8.99881e-55	1.38522e-28	5.75252e-12	0	0	0	1.48478e-24	1.16421e-48	1.35549e-84	2.35202e-140	0	0	0	0	0	0	0	0	0
								9	7.30271e-155	9.85197e-93	3.86371e-54	3.64165e-28	1.01288e-11	0	0	0	6.09886e-25	2.99296e-49	1.81087e-85	7.57358e-142	0	0	0	0	0	0	0	0	0
								10	4.14064e-153	8.48911e-92	1.64032e-53	9.49105e-28	1.77014e-11	0	0	0	2.48417e-25	7.61253e-50	2.37898e-86	2.29912e-143	0	0	0	0	0	0	0	0	0
								11	2.13054e-151	7.18095e-91	6.88639e-53	2.45235e-27	3.07047e-11	0	0	0	1.00334e-25	1.91552e-50	3.07266e-87	6.55721e-145	0	0	0	0	0	0	0	0	0
								12	1.00313e-149	5.96482e-90	2.85908e-52	6.28225e-27	5.28643e-11	0	0	0	4.01822e-26	4.76806e-51	3.90084e-88	1.75014e-146	0	0	0	0	0	0	0	0	0
								13	4.35205e-148	4.86654e-89	1.17399e-51	1.59561e-26	0	0	0	0	1.59561e-26	1.17399e-51	4.86654e-89	4.35205e-148	0	0	0	0	0	0	0	0	0
								14	1.75014e-146	3.90084e-88	4.76806e-51	4.01822e-26	0	0	0	5.28643e-11	6.28225e-27	2.85908e-52	5.96482e-90	1.00313e-149	0	0	0	0	0	0	0	0	0
								15	6.55721e-145	3.07266e-87	1.91552e-50	1.00334e-25	0	0	0	3.07047e-11	2.45235e-27	6.88639e-53	7.18095e-91	2.13054e-151	0	0	0	0	0	0	0	0	0
								16	2.29912e-143	2.37898e-86	7.61253e-50	2.48417e-25	0	0	0	1.77014e-11	9.49105e-28	1.64032e-53	8.48911e-92	4.14064e-153	0	0	0	0	0	0	0	0	0
								17	7.57358e-142	1.81087e-85	2.99296e-49	6.09886e-25	0	0	0	1.01288e-11	3.64165e-28	3.86371e-54	9.85197e-93	7.30271e-155	0	0	0	0	0	0	0	0	0
								18	2.35202e-140	1.35549e-84	1.16421e-48	1.48478e-24	0	0	0	5.75252e-12	1.38522e-28	8.99881e-55	1.12214e-93	1.15712e-156	0	0	0	0	0	0	0	0	0
								19	6.9075e-139	9.97953e-84	4.48075e-48	3.58456e-24	0	0	0	3.24261e-12	5.22351e-29	2.07222e-55	1.25402e-94	1.62688e-158	0	0	0	0	0	0	0	0	0
								20	1.92374e-137	7.22803e-83	1.70642e-47	8.58186e-24	0	0	0	1.81411e-12	1.9526e-29	4.71761e-56	1.3746e-95	1.99792e-160	0	0	0	0	0	0	0	0	0
								21	5.09333e-136	5.15124e-82	6.4308e-47	2.03756e-23	0	0	0	1.0073e-12	7.23528e-30	1.06171e-56	1.4775e-96	2.09939e-162	0	0	0	0	0	0	0	0	0
								22	1.28491e-134	3.61303e-81	2.39837e-46	4.79775e-23	0	0	0	5.55096e-13	2.65751e-30	2.36186e-57	1.55675e-97	1.83514e-164	0	0	0	0	0	0	0	0	0
								23	3.09495e-133	2.49447e-80	8.85252e-46	1.1204e-22	0	0	0	3.03591e-13	9.67508e-31	5.1931e-58	1.60736e-98	1.28107e-166	0	0	0	0	0	0	0	0	0
								24	7.13128e-132	1.69557e-79	3.23403e-45	2.59495e-22	0	0	0	1.64784e-13	3.49125e-31	1.12846e-58	1.62576e-99	6.6955e-169	0	0	0	0	0	0	0	0	0
								25	1.57459e-130	1.1349e-78	1.16942e-44	5.96097e-22	0	0	0	8.87634e-14	1.24863e-31	2.42321e-59	1.61028e-100	2.32887e-171	0	0	0	0	0	0	0	0	0
								26	3.33691e-129	7.48138e-78	4.1858e-44	1.35815e-21	0	0	0	4.74506e-14	4.42591e-32	5.14169e-60	1.56129e-101	4.04317e-174	0	0	0	0	0	0	0	0	0
								27	6.79742e-128	4.85804e-77	1.48316e-43	3.06927e-21	0	0	0	2.51728e-14	1.55477e-32	1.07792e-60	1.4813e-102	0	0	0	0	0	0	0	0	0	0
								28	1.33278e-126	3.1079e-76	5.20263e-43	6.88e-21	0	0	0	1.32523e-14	5.41263e-33	2.23252e-61	1.3747e-103	0	0	0	0	0	0	0	0	0	0
								29	2.51849e-125	1.95916e-75	1.80681e-42	1.52974e-20	0	0	0	6.92338e-15	1.86729e-33	4.56757e-62	1.24736e-104	0	0	0	0	0	0	0	0	0	0
								30	4.59205e-124	1.21713e-74	6.21263e-42	3.37393e-20	0	0	0	3.58922e-15	6.38354e-34	9.23031e-63	1.10615e-105	0	0	0	0	0	0	0	0	0	0
								31	8.08794e-123	7.45302e-74	2.11514e-41	7.38164e-20	0	0	0	1.84643e-15	2.16241e-34	1.84222e-63	9.58247e-107	0	0	0	0	0	0	0	0	0	0
								32	1.37748e-121	4.49908e-73	7.13059e-41	1.60206e-19	0	0	0	9.42547e-16	7.25807e-35	3.63094e-64	8.10547e-108	0	0	0	0	0	0	0	0	0	0
								33	2.27075e-120	2.67776e-72	2.38044e-40	3.44924e-19	0	0	0	4.77426e-16	2.41377e-35	7.06642e-65	6.6912e-109	0	0	0	0	0	0	0	0	0	0
								34	3.62652e-119	1.57159e-71	7.86965e-40	7.36713e-19	0	0	0	2.39956e-16	7.95321e-36	1.3578e-65	5.38804e-110	0	0	0	0	0	0	0	0	0	0
								35	5.61593e-118	9.09675e-71	2.57658e-39	1.56104e-18	0	0	0	1.19666e-16	2.59622e-36	2.57563e-66	4.22986e-111	0	0	0	0	0	0	0	0	0	0
								36	8.43949e-117	5.19361e-70	8.35495e-39	3.28153e-18	0	0	0	5.92132e-17	8.39603e-37	4.82268e-67	3.23553e-112	0	0	0	0	0	0	0	0	0	0
								37	1.23171e-115	2.92514e-69	2.68334e-38	6.84384e-18	0	0	0	2.90711e-17	2.6898e-37	8.91255e-68	2.41008e-113	0	0	0	0	0	0	0	0	0	0
								38	1.74708e-114	1.62544e-68	8.53614e-38	1.41609e-17	0	0	0	1.41609e-17	8.53614e-38	1.62544e-68	1.74708e-114	0	0	0	0	0	0	0	0	0	0
								39	2.41008e-113	8.91255e-68	2.6898e-37	2.90711e-17	0	0	0	6.84384e-18	2.68334e-38	2.92514e-69	1.23171e-115	0	0	0	0	0	0	0	0	0	0
								40	3.23553e-112	4.82268e-67	8.39603e-37	5.92132e-17	0	0	0	3.28153e-18	8.35495e-39	5.19361e-70	8.43949e-117	0	0	0	0	0	0	0	0	0	0
								41	4.22986e-111	2.57563e-66	2.59622e-36	1.19666e-16	0	0	0	1.56104e-18	2.57658e-39	9.09675e-71	5.61593e-118	0	0	0	0	0	0	0	0	0	0
								42	5.38804e-110	1.3578e-65	7.95321e-36	2.39956e-16	0	0	0	7.36713e-19	7.86965e-40	1.57159e-71	3.62652e-119	0	0	0	0	0	0	0	0	0	0
								43	6.6912e-109	7.06642e-65	2.41377e-35	4.77426e-16	0	0	0	3.44924e-19	2.38044e-40	2.67776e-72	2.27075e-120	0	0	0	0	0	0	0	0	0	0
								44	8.10547e-108	3.63094e-64	7.25807e-35	9.42547e-16	0	0	0	1.60206e-19	7.13059e-41	4.49908e-73	1.37748e-121	0	0	0	0	0	0	0	0	0	0
								45	9.58247e-107	1.84222e-63	2.16241e-34	1.84643e-15	0	0	0	7.38164e-20	2.11514e-41	7.45302e-74	8.08794e-123	0	0	0	0	0	0	0	0	0	0
								46	1.10615e-105	9.23031e-63	6.38354e-34	3.58922e-15	0	0	0	3.37393e-20	6.21263e-42	1.21713e-74	4.59205e-124	0	0	0	0	0	0	0	0	0	0
								47	1.24736e-104	4.56757e-62	1.86729e-33	6.92338e-15	0	0	0	1.52974e-20	1.80681e-42	1.95916e-75	2.51849e-125	0	0	0	0	0	0	0	0	0	0
								48	1.3747e-103	2.23252e-61	5.41263e-33	1.32523e-14	0	0	0	6.88e-21	5.20263e-43	3.1079e-76	1.33278e-126	0	0	0	0	0	0	0	0	0	0
								49	1.4813e-102	1.07792e-60	1.55477e-32	2.51728e-14	0	0	0	3.06927e-21	1.48316e-43	4.85804e-77	6.79742e-128	0	0	0	0	0	0	0	0	0	0

## Sheet: 3.2_Fisher exact test
This spreadsheet performs Fisher's exact test for a 2x2 table.
For more information, see http://udel.edu/~mcdonald/statfishers.html.
The spreadsheet comes with the Adh data from that web page entered as an example.
To use it, replace the Adh data with your numbers.
The smaller column total must be less than 500.
	P-value:	1.19072e-25
	LIVE	DIE	SUM	row totals
wtf68Δ/wtf68+	576	272	848	848
wtf68Δ/wtf68Δ	482	46	528	528
column totals	1058	318		1376
	column 1	column 2		row totals
row 1	46	482		528
row 2	272	576		848
column totals	318	1058		1376
smaller column	46	272	318	4.97523e-26
	0	4.22006e-80	4.22006e-80
	1	1.3344e-77	1.3344e-77
	2	2.09514e-75	2.09514e-75
	3	2.1779e-73	2.1779e-73
	4	1.68619e-71	1.68619e-71
	5	1.03716e-69	1.03716e-69
	6	5.27927e-68	5.27927e-68
	7	2.28732e-66	2.28732e-66
	8	8.61098e-65	8.61098e-65
	9	2.86145e-63	2.86145e-63
	10	8.49803e-62	8.49803e-62
	11	2.27829e-60	2.27829e-60
	12	5.55978e-59	5.55978e-59
	13	1.24361e-57	1.24361e-57
	14	2.56487e-56	2.56487e-56
	15	4.90246e-55	4.90246e-55
	16	8.72292e-54	8.72292e-54
	17	1.45045e-52	1.45045e-52
	18	2.26171e-51	2.26171e-51
	19	3.31743e-50	3.31743e-50
	20	4.58985e-49	4.58985e-49
	21	6.00493e-48	6.00493e-48
	22	7.44578e-47	7.44578e-47
	23	8.76798e-46	8.76798e-46
	24	9.82408e-45	9.82408e-45
	25	1.04915e-43	1.04915e-43
	26	1.06961e-42	1.06961e-42
	27	1.04254e-41	1.04254e-41
	28	9.72815e-41	9.72815e-41
	29	8.70139e-40	8.70139e-40
	30	7.46926e-39	7.46926e-39
	31	6.15992e-38	6.15992e-38
	32	4.8857e-37	4.8857e-37
	33	3.73037e-36	3.73037e-36
	34	2.74438e-35	2.74438e-35
	35	1.94703e-34	1.94703e-34
	36	1.33318e-33	1.33318e-33
	37	8.81692e-33	8.81692e-33
	38	5.63602e-32	5.63602e-32
	39	3.48458e-31	3.48458e-31
	40	2.08511e-30	2.08511e-30
	41	1.20829e-29	1.20829e-29
	42	6.78479e-29	6.78479e-29
	43	3.69367e-28	3.69367e-28
	44	1.9506e-27	1.9506e-27
	45	9.99733e-27	9.99733e-27
	46	4.97523e-26	4.97523e-26
	47	2.40523e-25
	48	1.13006e-24
	49	5.16216e-24
	50	2.29362e-23
	51	9.91603e-23
	52	4.17293e-22
	53	1.70996e-21
	54	6.82524e-21
	55	2.65449e-20
	56	1.00627e-19
	57	3.71915e-19
	58	1.3406e-18
	59	4.71415e-18
	60	1.61761e-17
	61	5.41777e-17
	62	1.77157e-16
	63	5.65702e-16
	64	1.76447e-15
	65	5.37695e-15
	66	1.60121e-14
	67	4.66059e-14
	68	1.32619e-13
	69	3.69001e-13
	70	1.00413e-12
	71	2.67285e-12
	72	6.96079e-12
	73	1.77386e-11
	74	4.42412e-11
	75	1.08008e-10
	76	2.58151e-10
	77	6.04156e-10
	78	1.38466e-09
	79	3.10831e-09
	80	6.83515e-09
	81	1.47257e-08
	82	3.10862e-08
	83	6.43096e-08
	84	1.30393e-07
	85	2.59156e-07
	86	5.04942e-07
	87	9.646e-07
	88	1.80687e-06
	89	3.31915e-06
	90	5.97988e-06
	91	1.05674e-05
	92	1.83188e-05
	93	3.11545e-05
	94	5.19853e-05
	95	8.51167e-05
	96	0.000136761
	97	0.000215655
	98	0.000333767
	99	0.000507047
	100	0.000756152
	101	0.00110703
	102	0.00159122
	103	0.0022457
	104	0.00311212
	105	0.00423519
	106	0.00566018
	107	0.00742942
	108	0.00957801
	109	0.0121288
	110	0.015087
	111	0.0184358
	112	0.0221318
	113	0.0261028
	114	0.0302481
	115	0.0344406
	116	0.0385325
	117	0.0423629
	118	0.0457684
	119	0.0485946
	120	0.0507073
	121	0.0520031
	122	0.0524182
	123	0.0519333
	124	0.0505751
	125	0.0484137
	126	0.0455571
	127	0.0421419
	128	0.0383227
	129	0.0342606
	130	0.0301122
	131	0.0260202
	132	0.022106
	133	0.0184652
	134	0.0151652
	135	0.0122464
	136	0.00972385
	137	0.00759188
	138	0.0058284
	139	0.00439993
	140	0.00326622
	141	0.00238427
	142	0.00171152
	143	0.00120818
	144	0.000838701
	145	0.000572553
	146	0.00038438
	147	0.000253774
	148	0.000164769
	149	0.000105209
	150	6.60661e-05
	151	4.07996e-05
	152	2.47791e-05
	153	1.48003e-05
	154	8.69377e-06
	155	5.02228e-06
	156	2.85331e-06
	157	1.59423e-06
	158	8.76001e-07
	159	4.7338e-07
	160	2.51573e-07
	161	1.31482e-07
	162	6.75787e-08
	163	3.41582e-08
	164	1.69792e-08
	165	8.29984e-09
	166	3.98979e-09
	167	1.88605e-09
	168	8.76744e-10
	169	4.00777e-10
	170	1.80151e-10
	171	7.96282e-11
	172	3.46088e-11
	173	1.47907e-11
	174	6.21531e-12
	175	2.56804e-12
	176	1.04327e-12
	177	4.16709e-13
	178	1.63646e-13
	179	6.31834e-14
	180	2.39835e-14
	181	8.94999e-15
	182	3.28338e-15
	183	1.18412e-15
	184	4.1979e-16
	185	1.46291e-16
	186	5.01115e-17
	187	1.68724e-17
	188	5.58368e-18
	189	1.81615e-18
	190	5.80571e-19
	191	1.82395e-19
	192	5.6313e-20
	193	1.70853e-20
	194	5.09374e-21
	195	1.49222e-21
	196	4.29526e-22
	197	1.21475e-22
	198	3.37523e-23
	199	9.21336e-24
	200	2.47063e-24
	201	6.50804e-25
	202	1.68392e-25
	203	4.27954e-26	4.27954e-26
	204	1.0682e-26	1.0682e-26
	205	2.61855e-27	2.61855e-27
	206	6.30372e-28	6.30372e-28
	207	1.49016e-28	1.49016e-28
	208	3.45892e-29	3.45892e-29
	209	7.88302e-30	7.88302e-30
	210	1.76384e-30	1.76384e-30
	211	3.87444e-31	3.87444e-31
	212	8.35435e-32	8.35435e-32
	213	1.76822e-32	1.76822e-32
	214	3.67325e-33	3.67325e-33
	215	7.48891e-34	7.48891e-34
	216	1.49833e-34	1.49833e-34
	217	2.94159e-35	2.94159e-35
	218	5.66638e-36	5.66638e-36
	219	1.07088e-36	1.07088e-36
	220	1.98541e-37	1.98541e-37
	221	3.61074e-38	3.61074e-38
	222	6.44073e-39	6.44073e-39
	223	1.12675e-39	1.12675e-39
	224	1.933e-40	1.933e-40
	225	3.25165e-41	3.25165e-41
	226	5.36289e-42	5.36289e-42
	227	8.67106e-43	8.67106e-43
	228	1.37428e-43	1.37428e-43
	229	2.13483e-44	2.13483e-44
	230	3.24999e-45	3.24999e-45
	231	4.84825e-46	4.84825e-46
	232	7.08626e-47	7.08626e-47
	233	1.01468e-47	1.01468e-47
	234	1.42318e-48	1.42318e-48
	235	1.95504e-49	1.95504e-49
	236	2.63003e-50	2.63003e-50
	237	3.46429e-51	3.46429e-51
	238	4.46739e-52	4.46739e-52
	239	5.6392e-53	5.6392e-53
	240	6.96692e-54	6.96692e-54
	241	8.42279e-55	8.42279e-55
	242	9.96314e-56	9.96314e-56
	243	1.1529e-56	1.1529e-56
	244	1.30486e-57	1.30486e-57
	245	1.44427e-58	1.44427e-58
	246	1.563e-59	1.563e-59
	247	1.65357e-60	1.65357e-60
	248	1.70985e-61	1.70985e-61
	249	1.72773e-62	1.72773e-62
	250	1.70567e-63	1.70567e-63
	251	1.64484e-64	1.64484e-64
	252	1.54907e-65	1.54907e-65
	253	1.42443e-66	1.42443e-66
	254	1.27861e-67	1.27861e-67
	255	1.12011e-68	1.12011e-68
	256	9.57414e-70	9.57414e-70
	257	7.98275e-71	7.98275e-71
	258	6.49091e-72	6.49091e-72
	259	5.14569e-73	5.14569e-73
	260	3.97601e-74	3.97601e-74
	261	2.9936e-75	2.9936e-75
	262	2.1956e-76	2.1956e-76
	263	1.56817e-77	1.56817e-77
	264	1.09038e-78	1.09038e-78
	265	7.37841e-80	7.37841e-80
	266	4.85735e-81	4.85735e-81
	267	3.10982e-82	3.10982e-82
	268	1.93556e-83	1.93556e-83
	269	1.17072e-84	1.17072e-84
	270	6.87851e-86	6.87851e-86
	271	3.92422e-87	3.92422e-87
	272	2.17291e-88	2.17291e-88
	273	1.16724e-89	1.16724e-89
	274	6.08004e-91	6.08004e-91
	275	3.06948e-92	3.06948e-92
	276	1.5011e-93	1.5011e-93
	277	7.10732e-95	7.10732e-95
	278	3.25617e-96	3.25617e-96
	279	1.44263e-97	1.44263e-97
	280	6.17697e-99	6.17697e-99
	281	2.55437e-100	2.55437e-100
	282	1.01948e-101	1.01948e-101
	283	3.92408e-103	3.92408e-103
	284	1.45556e-104	1.45556e-104
	285	5.19871e-106	5.19871e-106
	286	1.78632e-107	1.78632e-107
	287	5.89958e-109	5.89958e-109
	288	1.87091e-110	1.87091e-110
	289	5.69121e-112	5.69121e-112
	290	1.65878e-113	1.65878e-113
	291	4.62687e-115	4.62687e-115
	292	1.23352e-116	1.23352e-116
	293	3.13879e-118	3.13879e-118
	294	7.61195e-120	7.61195e-120
	295	1.7565e-121	1.7565e-121
	296	3.84999e-123	3.84999e-123
	297	8.00033e-125	8.00033e-125
	298	1.57287e-126	1.57287e-126
	299	2.91894e-128	2.91894e-128
	300	5.10052e-130	5.10052e-130
	301	8.36863e-132	8.36863e-132
	302	1.28528e-133	1.28528e-133
	303	1.84136e-135	1.84136e-135
	304	2.45117e-137	2.45117e-137
	305	3.01831e-139	3.01831e-139
	306	3.42046e-141	3.42046e-141
	307	3.54613e-143	3.54613e-143
	308	3.33998e-145	3.33998e-145
	309	2.83431e-147	2.83431e-147
	310	2.14532e-149	2.14532e-149
	311	1.43048e-151	1.43048e-151
	312	8.2713e-154	8.2713e-154
	313	4.06262e-156	4.06262e-156
	314	1.64795e-158	1.64795e-158
	315	5.29968e-161	5.29968e-161
	316	1.26676e-163	1.26676e-163
	317	2.0004e-166	2.0004e-166
	318	1.56522e-169	1.56522e-169
	319
	320
	321
	322
	323
	324
	325
	326
	327
	328
	329
	330
	331
	332
	333
	334
	335
	336
	337
	338
	339
	340
	341
	342
	343
	344
	345
	346
	347
	348
	349
	350
	351
	352
	353
	354
	355
	356
	357
	358
	359
	360
	361
	362
	363
	364
	365
	366
	367
	368
	369
	370
	371
	372
	373
	374
	375
	376
	377
	378
	379
	380
	381
	382
	383
	384
	385
	386
	387
	388
	389
	390
	391
	392
	393
	394
	395
	396
	397
	398
	399
	400
	401
	402
	403
	404
	405
	406
	407
	408
	409
	410
	411
	412
	413
	414
	415
	416
	417
	418
	419
	420
	421
	422
	423
	424
	425
	426
	427
	428
	429
	430
	431
	432
	433
	434
	435
	436
	437
	438
	439
	440
	441
	442
	443
	444
	445
	446
	447
	448
	449
	450
	451
	452
	453
	454
	455
	456
	457
	458
	459
	460
	461
	462
	463
	464
	465
	466
	467
	468
	469
	470
	471
	472
	473
	474
	475
	476
	477
	478
	479
	480
	481
	482
	483
	484
	485
	486
	487
	488
	489
	490
	491
	492
	493
	494
	495
	496
	497
	498
	499
	500
