# Supplementary material for: The wtf meiotic driver gene family has unexpectedly persisted for over 100 million years
Source: eLife. 2022 Oct 13;11:e81149. doi: 10.7554/eLife.81149 (PMC9562144; doi:10.7554/eLife.81149)
Supplement: Figure 9—figure supplement 2—source data 1. — Raw data file with spore viability of wtf33+/wtf33Δ heterozygous cross can be found in Table 1.1. Corresponding octad genotypes are found in Table 1.2. Spore viability data of homozygous diploid are in Table 2. Exact binomial test was performed in Table 3.1, and the Fisher’s exact test is calculated in Table 3.2. [file elife-81149-fig9-figsupp2-data1.xlsx]

## Sheet: 1.1_Heterozygous viability
Cross ID	Total octad	Successful octad	Total spore (In successful octad)	Viable spore (In successful octad)	Viable Marker-Resistance (In successful octad)	Viable Marker-Sensitive (In successful octad)	Note
DY47903 cross 1	10	10	80	60	27	33
DY47903 cross 2	11	11	88	69	33	36
DY47903 cross 3	11	10	80	57	25	32
DY47903 cross 4	11	11	88	68	31	37
DY47903 cross 5	11	11	88	74	32	42
DY47904 cross 1	11	11	88	60	19	41	For manuscript figure
DY47904 cross 2	11	11	88	63	23	40
DY47904 cross 3	11	11	88	64	27	37
DY47904 cross 4	11	11	88	52	20	32
DY47904 cross 5	11	11	88	71	30	41
	109	108	864	638	267	371
Total viability	73.8426
		Viable_MarkerR (deletion)	Total-Viable_MarkerR		MarkerR viability
		267	597		0.309028
		Viable-Viable_MarkerR (WT)	Total-(Viable-Viable_MarkerR)		MarkerS viability
		371	493		0.429398
					wtf33Δ	wtf33+
				spores that are viable and with the indicated genotype	30.9028	42.9398

## Sheet: 1.2_Octad_genotyping
	4R4S	4R3S	3R4S	4R2S	2R4S	3R3S	4R1S	1R4S	3R2S	2R3S	3R1S	1R3S	2R2S	4R0S	0R4S	<= 3 viable spore	total
DY47903 cross 1	2		2		1	1		1	1	1						1	10
DY47903 cross 2	2		3	1	2	1			1							1	11
DY47903 cross 3		1	1		2	3		1					2				10
DY47903 cross 4	3	1	1			2		1	1	1						1	11
DY47903 cross 5	4		2		3			1	1								11
DY47904 cross 1			2		3	1		2		1					1	1	11
DY47904 cross 2	3		1		2	1		1							2	1	11
DY47904 cross 3	2	1	2		1	1		1	1							2	11
DY47904 cross 4	1			1			1	3		1		2				2	11
DY47904 cross 5	3		4		1					1			1		1		11
	20	3	18	2	15	10	1	11	5	5	0	2	3	0	4	9	108
Genotype	4R4S	4R3S	3R4S	4R2S	2R4S	3R3S	4R1S	1R4S	3R2S	2R3S	3R1S	1R3S	2R2S	4R0S	0R4S	<= 3 viable spore
Number	20	3	18	2	15	10	1	11	5	5	0	2	3	0	4	9

## Sheet: 2_Homozygous viability
Cross ID	Total octad	Successful octad	Total spore (In successful octad)	Viable spore (In successful octad)	Viable Marker-Resistance (In successful octad)	Viable Marker-Sensitive (In successful octad)
DY47903 × DY47904 -1	11	11	88	81	81	0
DY47903 × DY47904 -2	11	11	88	84	84	0
DY47903 × DY47904 -3	11	11	88	80	80	0
DY47903 × DY47904 -4	11	11	88	77	77	0
DY47903 × DY47904 -5	11	11	88	77	77	0
DY47903 × DY47904 -6	11	10	80	70	70	0
	66	65	520	469	469	0
Total viability	90.1923

## Sheet: 3.1_exact binomial test
This spreadsheet performs the exact binomial test of goodness-of-fit.
It comes with the wasp data from http://www.biostathandbook.com/exactgof.html entered as an example.
To use it, replace the wasp data with your observed numbers, and replace the wasp ratio (1:1) with your expected ratio.
The expected ratio can be any numbers you want, as long as the ratio is correct.
For example, if you've done a genetic cross with an expected 3:1 ratio, you could enter 3 and 1, or 0.75 and 0.25, or 75 and 25.
The result in column F is the P-value for a two-tailed test, which is almost always what you want.
The result in column G is the P-value for a one-tailed test, which is almost never what you want.
For more details see http://www.biostathandbook.com/exactgof.html
	observed numbers	expected proportions		expected numbers	P-value (two-tailed)	P-value (one tailed)		n	p	q	exp 1	exp2	point prob
wtf33+	371	1		319	4.38472e-05	2.19236e-05		638	0.5	0.5	319	319	6.41845e-06
wtf33Δ	267	1		319				0
								2.19236e-05
								2.19236e-05
	observed numbers	expected proportions		expected numbers	P-value (two-tailed)	P-value (one tailed)		n	p	q	exp 1	exp2	point prob
4R3S octad	3	1		10.5	0.00148964	0.00074482		21	0.5	0.5	10.5	10.5
3R4S octad	18	1		10.5
	observed numbers	expected proportions		expected numbers	P-value (two-tailed)	P-value (one tailed)		n	p	q	exp 1	exp2	point prob
4R2S octad	2	1		8.5	0.00234985	0.00117493		17	0.5	0.5	8.5	8.5
2R4S octad	15	1		8.5
	observed numbers	expected proportions		expected numbers	P-value (two-tailed)	P-value (one tailed)		n	p	q	exp 1	exp2	point prob
4R1S octad	1	1		6	0.00634766	0.00317383		12	0.5	0.5	6	6
1R4S octad	11	1		6
	observed numbers	expected proportions		expected numbers	P-value (two-tailed)	P-value (one tailed)		n	p	q	exp 1	exp2	point prob
4R0S octad	0	1		2	Sample size too small	Sample size too small		4	0.5	0.5	2	2
0R4S octad	4	1		2
									0	50	100	150	200	250	300	350	400	450	500	550	600	650	700	750	800	850	900	950	1000
								0	8.76724e-193	6.99046e-118	7.85504e-74	4.2335e-43	6.007e-22	9.47321e-09	0	0	3.0406e-11	2.95507e-26	1.6359e-49	5.82075e-83	2.08606e-131	0	0	0	0	0	0	0	0
								1	5.5935e-190	8.05959e-117	4.18417e-73	1.36818e-42	1.30899e-21	1.46439e-08	0	0	1.80465e-11	1.23183e-26	4.50608e-50	9.29629e-84	1.31897e-132	0	0	0	0	0	0	0	0
								2	1.78153e-187	9.09804e-116	2.20284e-72	4.38357e-42	2.83182e-21	2.24888e-08	0	0	1.06393e-11	5.09627e-27	1.22975e-50	1.46518e-84	8.10663e-134	0	0	0	0	0	0	0	0
								3	3.77684e-185	1.00593e-114	1.14633e-71	1.39243e-41	6.08214e-21	3.43109e-08	0	0	6.23048e-12	2.09251e-27	3.32496e-51	2.27858e-85	4.83978e-135	0	0	0	0	0	0	0	0
								4	5.99574e-183	1.08976e-113	5.897e-71	4.38525e-41	1.29693e-20	5.20067e-08	0	0	3.62416e-12	8.52674e-28	8.90615e-52	3.49601e-86	2.80451e-136	0	0	0	0	0	0	0	0
								5	7.60259e-181	1.15713e-112	2.99905e-70	1.36933e-40	2.74569e-20	7.8316e-08	0	0	2.09396e-12	3.44818e-28	2.36322e-52	5.29126e-87	1.57609e-137	0	0	0	0	0	0	0	0
								6	8.02074e-179	1.20465e-111	1.50801e-69	4.23965e-40	5.77128e-20	1.17168e-07	0	0	1.20171e-12	1.38381e-28	6.21162e-53	7.89882e-88	8.58265e-139	0	0	0	0	0	0	0	0
								7	7.24158e-177	1.23002e-110	7.49778e-69	1.3016e-39	1.20444e-19	1.74156e-07	0	0	6.85003e-13	5.51101e-29	1.61723e-53	1.16284e-88	4.52463e-140	0	0	0	0	0	0	0	0
								8	5.71179e-175	1.23214e-109	3.68641e-68	3.96247e-39	2.49574e-19	2.57185e-07	0	0	3.87832e-13	2.17793e-29	4.1704e-54	1.688e-89	2.30696e-141	0	0	0	0	0	0	0	0
								9	3.99826e-173	1.21125e-108	1.79247e-67	1.19622e-38	5.13478e-19	3.77336e-07	0	0	2.18096e-13	8.5409e-30	1.06513e-54	2.41574e-90	1.13644e-142	0	0	0	0	0	0	0	0
								10	2.5149e-171	1.16886e-107	8.62017e-67	3.58117e-38	1.04896e-18	5.5004e-07	0	0	1.21815e-13	3.32353e-30	2.69416e-55	3.40792e-91	5.40273e-144	0	0	0	0	0	0	0	0
								11	1.43578e-169	1.10754e-106	4.1004e-66	1.06323e-37	2.12775e-18	7.9661e-07	0	0	6.75761e-14	1.28327e-30	6.74858e-56	4.73828e-92	2.47588e-145	0	0	0	0	0	0	0	0
								12	7.50196e-168	1.03073e-105	1.92939e-65	3.13062e-37	4.28561e-18	1.14627e-06	0	0	3.72325e-14	4.91642e-31	1.67396e-56	6.49195e-93	1.0923e-146	0	0	0	0	0	0	0	0
								13	3.61248e-166	9.4238e-105	8.98104e-65	9.14218e-37	8.57122e-18	1.63877e-06	0	0	2.03742e-14	1.86888e-31	4.11149e-57	8.76355e-94	4.63292e-148	0	0	0	0	0	0	0	0
								14	1.61271e-164	8.46669e-104	4.136e-64	2.64789e-36	1.70223e-17	2.3278e-06	0	0	1.10729e-14	7.04857e-32	9.99876e-58	1.16537e-94	1.88637e-149	0	0	0	0	0	0	0	0
								15	6.70889e-163	7.47674e-103	1.88458e-63	7.60666e-36	3.35695e-17	3.28527e-06	0	0	5.97671e-15	2.63753e-32	2.40747e-58	1.52632e-95	7.36144e-151	0	0	0	0	0	0	0	0
								16	2.61228e-161	6.49117e-102	8.49685e-63	2.16744e-35	6.57403e-17	4.60679e-06	0	0	3.20386e-15	9.79169e-33	5.73873e-59	1.96858e-96	2.74859e-152	0	0	0	0	0	0	0	0
								17	9.55785e-160	5.54172e-101	3.7909e-62	6.12594e-35	1.27845e-16	6.41845e-06	0	0	1.70565e-15	3.60636e-33	1.35421e-59	2.49978e-97	9.80048e-154	0	0	0	0	0	0	0	0
								18	3.29746e-158	4.65341e-100	1.67378e-61	1.71745e-34	2.46894e-16	0	0	0	9.01793e-16	1.31771e-33	3.1633e-60	3.12472e-98	3.33026e-155	0	0	0	0	0	0	0	0
								19	1.07601e-156	3.84412e-99	7.314e-61	4.77634e-34	4.73495e-16	0	0	0	4.73495e-16	4.77634e-34	7.314e-61	3.84412e-99	1.07601e-156	0	0	0	0	0	0	0	0
								20	3.33026e-155	3.12472e-98	3.1633e-60	1.31771e-33	9.01793e-16	0	0	0	2.46894e-16	1.71745e-34	1.67378e-61	4.65341e-100	3.29746e-158	0	0	0	0	0	0	0	0
								21	9.80048e-154	2.49978e-97	1.35421e-59	3.60636e-33	1.70565e-15	0	0	6.41845e-06	1.27845e-16	6.12594e-35	3.7909e-62	5.54172e-101	9.55785e-160	0	0	0	0	0	0	0	0
								22	2.74859e-152	1.96858e-96	5.73873e-59	9.79169e-33	3.20386e-15	0	0	4.60679e-06	6.57403e-17	2.16744e-35	8.49685e-63	6.49117e-102	2.61228e-161	0	0	0	0	0	0	0	0
								23	7.36144e-151	1.52632e-95	2.40747e-58	2.63753e-32	5.97671e-15	0	0	3.28527e-06	3.35695e-17	7.60666e-36	1.88458e-63	7.47674e-103	6.70889e-163	0	0	0	0	0	0	0	0
								24	1.88637e-149	1.16537e-94	9.99876e-58	7.04857e-32	1.10729e-14	0	0	2.3278e-06	1.70223e-17	2.64789e-36	4.136e-64	8.46669e-104	1.61271e-164	0	0	0	0	0	0	0	0
								25	4.63292e-148	8.76355e-94	4.11149e-57	1.86888e-31	2.03742e-14	0	0	1.63877e-06	8.57122e-18	9.14218e-37	8.98104e-65	9.4238e-105	3.61248e-166	0	0	0	0	0	0	0	0
								26	1.0923e-146	6.49195e-93	1.67396e-56	4.91642e-31	3.72325e-14	0	0	1.14627e-06	4.28561e-18	3.13062e-37	1.92939e-65	1.03073e-105	7.50196e-168	0	0	0	0	0	0	0	0
								27	2.47588e-145	4.73828e-92	6.74858e-56	1.28327e-30	6.75761e-14	0	0	7.9661e-07	2.12775e-18	1.06323e-37	4.1004e-66	1.10754e-106	1.43578e-169	0	0	0	0	0	0	0	0
								28	5.40273e-144	3.40792e-91	2.69416e-55	3.32353e-30	1.21815e-13	0	0	5.5004e-07	1.04896e-18	3.58117e-38	8.62017e-67	1.16886e-107	2.5149e-171	0	0	0	0	0	0	0	0
								29	1.13644e-142	2.41574e-90	1.06513e-54	8.5409e-30	2.18096e-13	0	0	3.77336e-07	5.13478e-19	1.19622e-38	1.79247e-67	1.21125e-108	3.99826e-173	0	0	0	0	0	0	0	0
								30	2.30696e-141	1.688e-89	4.1704e-54	2.17793e-29	3.87832e-13	0	0	2.57185e-07	2.49574e-19	3.96247e-39	3.68641e-68	1.23214e-109	5.71179e-175	0	0	0	0	0	0	0	0
								31	4.52463e-140	1.16284e-88	1.61723e-53	5.51101e-29	6.85003e-13	0	0	1.74156e-07	1.20444e-19	1.3016e-39	7.49778e-69	1.23002e-110	7.24158e-177	0	0	0	0	0	0	0	0
								32	8.58265e-139	7.89882e-88	6.21162e-53	1.38381e-28	1.20171e-12	0	0	1.17168e-07	5.77128e-20	4.23965e-40	1.50801e-69	1.20465e-111	8.02074e-179	0	0	0	0	0	0	0	0
								33	1.57609e-137	5.29126e-87	2.36322e-52	3.44818e-28	2.09396e-12	0	0	7.8316e-08	2.74569e-20	1.36933e-40	2.99905e-70	1.15713e-112	7.60259e-181	0	0	0	0	0	0	0	0
								34	2.80451e-136	3.49601e-86	8.90615e-52	8.52674e-28	3.62416e-12	0	0	5.20067e-08	1.29693e-20	4.38525e-41	5.897e-71	1.08976e-113	5.99574e-183	0	0	0	0	0	0	0	0
								35	4.83978e-135	2.27858e-85	3.32496e-51	2.09251e-27	6.23048e-12	0	0	3.43109e-08	6.08214e-21	1.39243e-41	1.14633e-71	1.00593e-114	3.77684e-185	0	0	0	0	0	0	0	0
								36	8.10663e-134	1.46518e-84	1.22975e-50	5.09627e-27	1.06393e-11	0	0	2.24888e-08	2.83182e-21	4.38357e-42	2.20284e-72	9.09804e-116	1.78153e-187	0	0	0	0	0	0	0	0
								37	1.31897e-132	9.29629e-84	4.50608e-50	1.23183e-26	1.80465e-11	0	0	1.46439e-08	1.30899e-21	1.36818e-42	4.18417e-73	8.05959e-117	5.5935e-190	0	0	0	0	0	0	0	0
								38	2.08606e-131	5.82075e-83	1.6359e-49	2.95507e-26	3.0406e-11	0	0	9.47321e-09	6.007e-22	4.2335e-43	7.85504e-74	6.99046e-118	8.76724e-193	0	0	0	0	0	0	0	0
								39	3.20932e-130	3.59709e-82	5.88454e-49	7.03588e-26	5.08887e-11	0	0	6.08818e-09	2.73668e-22	1.29862e-43	1.45734e-74	5.93418e-119	0	0	0	0	0	0	0	0	0
								40	4.80595e-129	2.19423e-81	2.09742e-48	1.66269e-25	8.46025e-11	0	0	3.88707e-09	1.23772e-22	3.94887e-44	2.67178e-75	4.92839e-120	0	0	0	0	0	0	0	0	0
								41	7.00966e-128	1.32136e-80	7.40791e-48	3.89992e-25	1.39717e-10	0	0	2.46546e-09	5.55713e-23	1.19029e-44	4.83983e-76	4.00275e-121	0	0	0	0	0	0	0	0	0
								42	9.96373e-127	7.85633e-80	2.59277e-47	9.07951e-25	2.29205e-10	0	0	1.55349e-09	2.47682e-23	3.55635e-45	8.66168e-77	3.17786e-122	0	0	0	0	0	0	0	0	0
								43	1.38102e-125	4.61243e-79	8.9931e-47	2.09817e-24	3.7352e-10	0	0	9.72413e-10	1.09584e-23	1.0532e-45	1.53135e-77	2.46512e-123	0	0	0	0	0	0	0	0	0
								44	1.86751e-124	2.67423e-78	3.09138e-46	4.8128e-24	6.04673e-10	0	0	6.04673e-10	4.8128e-24	3.09138e-46	2.67423e-78	1.86751e-124	0	0	0	0	0	0	0	0	0
								45	2.46512e-123	1.53135e-77	1.0532e-45	1.09584e-23	9.72413e-10	0	0	3.7352e-10	2.09817e-24	8.9931e-47	4.61243e-79	1.38102e-125	0	0	0	0	0	0	0	0	0
								46	3.17786e-122	8.66168e-77	3.55635e-45	2.47682e-23	1.55349e-09	0	0	2.29205e-10	9.07951e-25	2.59277e-47	7.85633e-80	9.96373e-127	0	0	0	0	0	0	0	0	0
								47	4.00275e-121	4.83983e-76	1.19029e-44	5.55713e-23	2.46546e-09	0	0	1.39717e-10	3.89992e-25	7.40791e-48	1.32136e-80	7.00966e-128	0	0	0	0	0	0	0	0	0
								48	4.92839e-120	2.67178e-75	3.94887e-44	1.23772e-22	3.88707e-09	0	0	8.46025e-11	1.66269e-25	2.09742e-48	2.19423e-81	4.80595e-129	0	0	0	0	0	0	0	0	0
								49	5.93418e-119	1.45734e-74	1.29862e-43	2.73668e-22	6.08818e-09	0	0	5.08887e-11	7.03588e-26	5.88454e-49	3.59709e-82	3.20932e-130	0	0	0	0	0	0	0	0	0

## Sheet: 3.2_Fisher exact test
This spreadsheet performs Fisher's exact test for a 2x2 table.
For more information, see http://udel.edu/~mcdonald/statfishers.html.
The spreadsheet comes with the Adh data from that web page entered as an example.
To use it, replace the Adh data with your numbers.
The smaller column total must be less than 500.
	P-value:	2.14549e-14
	LIVE	DIE	SUM	row totals
wtf33Δ/wtf33+	638	226	864	864
wtf33Δ/wtf33Δ	469	51	520	520
column totals	1107	277		1384
	column 1	column 2		row totals
row 1	51	469		520
row 2	226	638		864
column totals	277	1107		1384
smaller column	51	226	277	1.08557e-14
	0	3.40256e-66	3.40256e-66
	1	8.33512e-64	8.33512e-64
	2	1.01354e-61	1.01354e-61
	3	8.15703e-60	8.15703e-60
	4	4.88794e-58	4.88794e-58
	5	2.3262e-56	2.3262e-56
	6	9.15834e-55	9.15834e-55
	7	3.06806e-53	3.06806e-53
	8	8.92768e-52	8.92768e-52
	9	2.2923e-50	2.2923e-50
	10	5.2584e-49	5.2584e-49
	11	1.08853e-47	1.08853e-47
	12	2.05037e-46	2.05037e-46
	13	3.53873e-45	3.53873e-45
	14	5.62933e-44	5.62933e-44
	15	8.29613e-43	8.29613e-43
	16	1.13771e-41	1.13771e-41
	17	1.45752e-40	1.45752e-40
	18	1.75037e-39	1.75037e-39
	19	1.97654e-38	1.97654e-38
	20	2.10448e-37	2.10448e-37
	21	2.118e-36	2.118e-36
	22	2.01942e-35	2.01942e-35
	23	1.82784e-34	1.82784e-34
	24	1.57353e-33	1.57353e-33
	25	1.29058e-32	1.29058e-32
	26	1.01009e-31	1.01009e-31
	27	7.55487e-31	7.55487e-31
	28	5.4073e-30	5.4073e-30
	29	3.70823e-29	3.70823e-29
	30	2.43946e-28	2.43946e-28
	31	1.54112e-27	1.54112e-27
	32	9.35921e-27	9.35921e-27
	33	5.46915e-26	5.46915e-26
	34	3.07799e-25	3.07799e-25
	35	1.66975e-24	1.66975e-24
	36	8.73813e-24	8.73813e-24
	37	4.41463e-23	4.41463e-23
	38	2.15471e-22	2.15471e-22
	39	1.01671e-21	1.01671e-21
	40	4.64077e-21	4.64077e-21
	41	2.05039e-20	2.05039e-20
	42	8.77372e-20	8.77372e-20
	43	3.63806e-19	3.63806e-19
	44	1.46259e-18	1.46259e-18
	45	5.70369e-18	5.70369e-18
	46	2.15862e-17	2.15862e-17
	47	7.93193e-17	7.93193e-17
	48	2.83109e-16	2.83109e-16
	49	9.81923e-16	9.81923e-16
	50	3.31073e-15	3.31073e-15
	51	1.08557e-14	1.08557e-14
	52	3.46285e-14
	53	1.07499e-13
	54	3.24877e-13
	55	9.5612e-13
	56	2.74106e-12
	57	7.65718e-12
	58	2.0849e-11
	59	5.5346e-11
	60	1.43281e-10
	61	3.61827e-10
	62	8.9152e-10
	63	2.14378e-09
	64	5.03211e-09
	65	1.15328e-08
	66	2.58121e-08
	67	5.64299e-08
	68	1.20525e-07
	69	2.51541e-07
	70	5.1308e-07
	71	1.02302e-06
	72	1.99425e-06
	73	3.80141e-06
	74	7.08678e-06
	75	1.29229e-05
	76	2.30539e-05
	77	4.02406e-05
	78	6.87357e-05
	79	0.00011491
	80	0.000188037
	81	0.000301232
	82	0.000472479
	83	0.000725668
	84	0.00109149
	85	0.00160796
	86	0.00232034
	87	0.00328017
	88	0.00454309
	89	0.00616538
	90	0.00819906
	91	0.0106857
	92	0.0136495
	93	0.0170899
	94	0.0209754
	95	0.0252384
	96	0.0297736
	97	0.0344388
	98	0.039061
	99	0.043446
	100	0.0473909
	101	0.0507
	102	0.0532005
	103	0.0547575
	104	0.0552863
	105	0.0547597
	106	0.0532107
	107	0.0507285
	108	0.0474507
	109	0.0435503
	110	0.0392208
	111	0.0346608
	112	0.030059
	113	0.0255824
	114	0.0213677
	115	0.017516
	116	0.0140927
	117	0.0111286
	118	0.00862572
	119	0.00656246
	120	0.00490081
	121	0.0035926
	122	0.00258524
	123	0.00182621
	124	0.0012664
	125	0.000862121
	126	0.000576167
	127	0.000378024
	128	0.000243494
	129	0.000153978
	130	9.55946e-05
	131	5.82666e-05
	132	3.48674e-05
	133	2.04849e-05
	134	1.18159e-05
	135	6.69145e-06
	136	3.72042e-06
	137	2.03088e-06
	138	1.08841e-06
	139	5.72691e-07
	140	2.95843e-07
	141	1.50043e-07
	142	7.47098e-08
	143	3.65211e-08
	144	1.75271e-08
	145	8.25792e-09
	146	3.81961e-09
	147	1.7344e-09
	148	7.73129e-10
	149	3.38314e-10
	150	1.45327e-10
	151	6.12799e-11
	152	2.53645e-11
	153	1.03053e-11
	154	4.1097e-12
	155	1.60865e-12
	156	6.18016e-13
	157	2.33031e-13
	158	8.6236e-14
	159	3.1319e-14
	160	1.11624e-14
	161	3.90407e-15	3.90407e-15
	162	1.3399e-15	1.3399e-15
	163	4.51238e-16	4.51238e-16
	164	1.49106e-16	1.49106e-16
	165	4.83416e-17	4.83416e-17
	166	1.53768e-17	1.53768e-17
	167	4.79847e-18	4.79847e-18
	168	1.46897e-18	1.46897e-18
	169	4.41138e-19	4.41138e-19
	170	1.29945e-19	1.29945e-19
	171	3.75446e-20	3.75446e-20
	172	1.06392e-20	1.06392e-20
	173	2.95677e-21	2.95677e-21
	174	8.05835e-22	8.05835e-22
	175	2.15361e-22	2.15361e-22
	176	5.6435e-23	5.6435e-23
	177	1.44998e-23	1.44998e-23
	178	3.65237e-24	3.65237e-24
	179	9.01891e-25	9.01891e-25
	180	2.18306e-25	2.18306e-25
	181	5.17938e-26	5.17938e-26
	182	1.20434e-26	1.20434e-26
	183	2.74441e-27	2.74441e-27
	184	6.12823e-28	6.12823e-28
	185	1.34081e-28	1.34081e-28
	186	2.87414e-29	2.87414e-29
	187	6.0355e-30	6.0355e-30
	188	1.24148e-30	1.24148e-30
	189	2.50118e-31	2.50118e-31
	190	4.93493e-32	4.93493e-32
	191	9.53458e-33	9.53458e-33
	192	1.80367e-33	1.80367e-33
	193	3.3404e-34	3.3404e-34
	194	6.05581e-35	6.05581e-35
	195	1.07455e-35	1.07455e-35
	196	1.86598e-36	1.86598e-36
	197	3.17069e-37	3.17069e-37
	198	5.27122e-38	5.27122e-38
	199	8.57272e-39	8.57272e-39
	200	1.36368e-39	1.36368e-39
	201	2.12145e-40	2.12145e-40
	202	3.22707e-41	3.22707e-41
	203	4.79925e-42	4.79925e-42
	204	6.97682e-43	6.97682e-43
	205	9.91262e-44	9.91262e-44
	206	1.37623e-44	1.37623e-44
	207	1.86676e-45	1.86676e-45
	208	2.47343e-46	2.47343e-46
	209	3.2007e-47	3.2007e-47
	210	4.04423e-48	4.04423e-48
	211	4.9887e-49	4.9887e-49
	212	6.0063e-50	6.0063e-50
	213	7.0567e-51	7.0567e-51
	214	8.0886e-52	8.0886e-52
	215	9.04321e-53	9.04321e-53
	216	9.85927e-54	9.85927e-54
	217	1.04793e-54	1.04793e-54
	218	1.08561e-55	1.08561e-55
	219	1.09586e-56	1.09586e-56
	220	1.07759e-57	1.07759e-57
	221	1.03192e-58	1.03192e-58
	222	9.6206e-60	9.6206e-60
	223	8.72954e-61	8.72954e-61
	224	7.70678e-62	7.70678e-62
	225	6.61762e-63	6.61762e-63
	226	5.52495e-64	5.52495e-64
	227	4.48328e-65	4.48328e-65
	228	3.5346e-66	3.5346e-66
	229	2.70641e-67	2.70641e-67
	230	2.01177e-68	2.01177e-68
	231	1.45114e-69	1.45114e-69
	232	1.0153e-70	1.0153e-70
	233	6.88696e-72	6.88696e-72
	234	4.52693e-73	4.52693e-73
	235	2.88203e-74	2.88203e-74
	236	1.77615e-75	1.77615e-75
	237	1.05903e-76	1.05903e-76
	238	6.10552e-78	6.10552e-78
	239	3.40141e-79	3.40141e-79
	240	1.82992e-80	1.82992e-80
	241	9.50045e-82	9.50045e-82
	242	4.75643e-83	4.75643e-83
	243	2.29461e-84	2.29461e-84
	244	1.0658e-85	1.0658e-85
	245	4.76223e-87	4.76223e-87
	246	2.04509e-88	2.04509e-88
	247	8.43262e-90	8.43262e-90
	248	3.3351e-91	3.3351e-91
	249	1.26377e-92	1.26377e-92
	250	4.58281e-94	4.58281e-94
	251	1.58833e-95	1.58833e-95
	252	5.25417e-97	5.25417e-97
	253	1.65645e-98	1.65645e-98
	254	4.96904e-100	4.96904e-100
	255	1.41589e-101	1.41589e-101
	256	3.82499e-103	3.82499e-103
	257	9.77638e-105	9.77638e-105
	258	2.35878e-106	2.35878e-106
	259	5.35886e-108	5.35886e-108
	260	1.14322e-109	1.14322e-109
	261	2.28304e-111	2.28304e-111
	262	4.25329e-113	4.25329e-113
	263	7.36311e-115	7.36311e-115
	264	1.1792e-116	1.1792e-116
	265	1.73815e-118	1.73815e-118
	266	2.34411e-120	2.34411e-120
	267	2.87233e-122	2.87233e-122
	268	3.17142e-124	3.17142e-124
	269	3.12372e-126	3.12372e-126
	270	2.71076e-128	2.71076e-128
	271	2.0402e-130	2.0402e-130
	272	1.30455e-132	1.30455e-132
	273	6.89003e-135	6.89003e-135
	274	2.88552e-137	2.88552e-137
	275	8.9834e-140	8.9834e-140
	276	1.84806e-142	1.84806e-142
	277	1.88414e-145	1.88414e-145
	278
	279
	280
	281
	282
	283
	284
	285
	286
	287
	288
	289
	290
	291
	292
	293
	294
	295
	296
	297
	298
	299
	300
	301
	302
	303
	304
	305
	306
	307
	308
	309
	310
	311
	312
	313
	314
	315
	316
	317
	318
	319
	320
	321
	322
	323
	324
	325
	326
	327
	328
	329
	330
	331
	332
	333
	334
	335
	336
	337
	338
	339
	340
	341
	342
	343
	344
	345
	346
	347
	348
	349
	350
	351
	352
	353
	354
	355
	356
	357
	358
	359
	360
	361
	362
	363
	364
	365
	366
	367
	368
	369
	370
	371
	372
	373
	374
	375
	376
	377
	378
	379
	380
	381
	382
	383
	384
	385
	386
	387
	388
	389
	390
	391
	392
	393
	394
	395
	396
	397
	398
	399
	400
	401
	402
	403
	404
	405
	406
	407
	408
	409
	410
	411
	412
	413
	414
	415
	416
	417
	418
	419
	420
	421
	422
	423
	424
	425
	426
	427
	428
	429
	430
	431
	432
	433
	434
	435
	436
	437
	438
	439
	440
	441
	442
	443
	444
	445
	446
	447
	448
	449
	450
	451
	452
	453
	454
	455
	456
	457
	458
	459
	460
	461
	462
	463
	464
	465
	466
	467
	468
	469
	470
	471
	472
	473
	474
	475
	476
	477
	478
	479
	480
	481
	482
	483
	484
	485
	486
	487
	488
	489
	490
	491
	492
	493
	494
	495
	496
	497
	498
	499
	500
