# Supplementary material for: The wtf meiotic driver gene family has unexpectedly persisted for over 100 million years
Source: eLife. 2022 Oct 13;11:e81149. doi: 10.7554/eLife.81149 (PMC9562144; doi:10.7554/eLife.81149)
Supplement: Figure 9—figure supplement 4—source data 1. — Raw data file with spore viability of wtf46+/wtf46Δ heterozygous cross can be found in Table 1.1. Corresponding octad genotypes are found in Table 1.2. Spore viability data of homozygous diploid are in Table 2. Exact binomial test was performed in Table 3.1, and the Fisher’s exact test is calculated in Table 3.2. [file elife-81149-fig9-figsupp4-data1.xlsx]

## Sheet: 1.1_Heterozygous viability
Cross ID	Total octad	Successful octad	Total spore (In successful octad)	Viable spore (In successful octad)	Viable Marker-Resistance (In successful octad)	Viable Marker-Sensitive (In successful octad)	Note
DY47907 cross 1	11	11	88	80	39	41
DY47907 cross 2	9	8	64	56	27	29
DY47907 cross 3	11	10	80	66	28	38
DY47907 cross 4	11	10	80	79	39	40
DY47907 cross 5	11	11	88	77	37	40	For manuscript figure
DY47908 cross 1	9	8	64	57	27	30
DY47908 cross 2	7	6	48	45	22	23
DY47908 cross 3	11	10	80	64	30	34
DY47908 cross 4	11	11	88	82	42	40
	91	85	680	606	291	315
Total viability	89.1176
		Viable_MarkerR (deletion)	Total-Viable_MarkerR		MarkerR viability
		291	389		0.427941
		Viable-Viable_MarkerR (WT)	Total-(Viable-Viable_MarkerR)		MarkerS viability
		315	365		0.463235
					wtf46Δ	wtf46+
				spores that are viable and with the indicated genotype	42.7941	46.3235

## Sheet: 1.2_Octad_genotyping
	4R4S	4R3S	3R4S	4R2S	2R4S	3R3S	4R1S	1R4S	3R2S	2R3S	3R1S	1R3S	2R2S	4R0S	0R4S	<= 3 viable spore	total
DY47907 cross 1	5	2	2		1	1											11
DY47907 cross 2	4		1		1	1			1								8
DY47907 cross 3	1		6		1	1							1				10
DY47907 cross 4	9		1														10
DY47907 cross 5	4	2	2		2				1								11
DY47908 cross 1	4	1	2									1					8
DY47908 cross 2	4		1			1											6
DY47908 cross 3	3	1	1	1	1			1		1	1						10
DY47908 cross 4	7		2	2													11
	41	6	18	3	6	4	0	1	2	1	1	1	1	0	0	0	85
Genotype	4R4S	4R3S	3R4S	4R2S	2R4S	3R3S	4R1S	1R4S	3R2S	2R3S	3R1S	1R3S	2R2S	4R0S	0R4S	<= 3 viable spore
Number	41	6	18	3	6	4	0	1	2	1	1	1	1	0	0	0

## Sheet: 2_Homozygous viability
Cross ID	Total octad	Successful octad	Total spore (In successful octad)	Viable spore (In successful octad)	Viable Marker-Resistance (In successful octad)	Viable Marker-Sensitive (In successful octad)
DY47907 × DY47908 -1	10	10	80	78	78	0
DY47907 × DY47908 -2	11	11	88	85	85	0
DY47907 × DY47908 -3	11	10	80	75	75	0
DY47907 × DY47908 -4	5	5	40	40	40	0
DY47907 × DY47908 -5	11	11	88	84	84	0
DY47907 × DY47908 -6	11	11	88	77	77	0
	59	58	464	439	439	0
Total viability	94.6121

## Sheet: 3.1_exact binomial test
This spreadsheet performs the exact binomial test of goodness-of-fit.
It comes with the wasp data from http://www.biostathandbook.com/exactgof.html entered as an example.
To use it, replace the wasp data with your observed numbers, and replace the wasp ratio (1:1) with your expected ratio.
The expected ratio can be any numbers you want, as long as the ratio is correct.
For example, if you've done a genetic cross with an expected 3:1 ratio, you could enter 3 and 1, or 0.75 and 0.25, or 75 and 25.
The result in column F is the P-value for a two-tailed test, which is almost always what you want.
The result in column G is the P-value for a one-tailed test, which is almost never what you want.
For more details see http://www.biostathandbook.com/exactgof.html
	observed numbers	expected proportions		expected numbers	P-value (two-tailed)	P-value (one tailed)		n	p	q	exp 1	exp2	point prob
wtf46+	315	1		303	0.350152	0.175076		606	0.5	0.5	303	303	0.0201564
wtf46Δ	291	1		303				0
								0.175076
								0.175076
	observed numbers	expected proportions		expected numbers	P-value (two-tailed)	P-value (one tailed)		n	p	q	exp 1	exp2	point prob
4R3S octad	6	1		12	0.0226558	0.0113279		24	0.5	0.5	12	12
3R4S octad	18	1		12
	observed numbers	expected proportions		expected numbers	P-value (two-tailed)	P-value (one tailed)		n	p	q	exp 1	exp2	point prob
4R2S octad	3	1		4.5	0.507812	0.253906		9	0.5	0.5	4.5	4.5
2R4S octad	6	1		4.5
	observed numbers	expected proportions		expected numbers	P-value (two-tailed)	P-value (one tailed)		n	p	q	exp 1	exp2	point prob
4R1S octad	0	1		0.5	Sample size too small	Sample size too small		1	0.5	0.5	0.5	0.5
1R4S octad	1	1		0.5
	observed numbers	expected proportions		expected numbers	P-value (two-tailed)	P-value (one tailed)		n	p	q	exp 1	exp2	point prob
4R0S octad	0	1		0	Sample size too small	Sample size too small		0	0.5	0.5	0	0
0R4S octad	0	1		0
									0	50	100	150	200	250	300	350	400	450	500	550	600	650	700	750	800	850	900	950	1000
								0	3.7655e-183	2.05846e-109	1.24099e-66	2.6726e-37	1.05638e-17	2.95322e-06	0	2.17167e-05	6.42045e-16	1.77783e-34	1.64613e-62	2.53188e-103	2.52664e-169	0	0	0	0	0	0	0	0
								1	2.28189e-180	2.24413e-108	6.21724e-66	8.07088e-37	2.13379e-17	4.18863e-06	0	1.5839e-05	3.29828e-16	6.14947e-35	3.48282e-63	2.57323e-104	2.52244e-171	0	0	0	0	0	0	0	0
								2	6.90273e-178	2.39518e-107	3.07815e-65	2.41596e-36	4.27815e-17	5.90065e-06	0	1.14742e-05	1.68196e-16	2.10878e-35	7.28479e-64	2.56391e-105	2.09505e-173	0	0	0	0	0	0	0	0
								3	1.38975e-175	2.50364e-106	1.5062e-64	7.16891e-36	8.51415e-17	8.25625e-06	0	8.25625e-06	8.51415e-17	7.16891e-36	1.5062e-64	2.50364e-106	1.38975e-175	0	0	0	0	0	0	0	0
								4	2.09505e-173	2.56391e-105	7.28479e-64	2.10878e-35	1.68196e-16	1.14742e-05	0	5.90065e-06	4.27815e-17	2.41596e-36	3.07815e-65	2.39518e-107	6.90273e-178	0	0	0	0	0	0	0	0
								5	2.52244e-171	2.57323e-104	3.48282e-63	6.14947e-35	3.29828e-16	1.5839e-05	0	4.18863e-06	2.13379e-17	8.07088e-37	6.21724e-66	2.24413e-108	2.28189e-180	0	0	0	0	0	0	0	0
								6	2.52664e-169	2.53188e-103	1.64613e-62	1.77783e-34	6.42045e-16	2.17167e-05	0	2.95322e-06	1.05638e-17	2.6726e-37	1.24099e-66	2.05846e-109	3.7655e-183	0	0	0	0	0	0	0	0
								7	2.16569e-167	2.44304e-102	7.69218e-62	5.09568e-34	1.24067e-15	2.95753e-05	0	2.06808e-06	5.19108e-18	8.77219e-38	2.44771e-67	1.84781e-110	0	0	0	0	0	0	0	0	0
								8	1.62156e-165	2.31246e-101	3.55407e-61	1.44808e-33	2.37993e-15	4.00068e-05	0	1.43842e-06	2.53192e-18	2.85384e-38	4.77015e-68	1.62263e-111	0	0	0	0	0	0	0	0	0
								9	1.07744e-163	2.14785e-100	1.62379e-60	4.08012e-33	4.53212e-15	5.37544e-05	0	9.93668e-07	1.22572e-18	9.20191e-39	9.18418e-69	1.39332e-112	0	0	0	0	0	0	0	0	0
								10	6.4323e-162	1.95812e-99	7.33657e-60	1.13988e-32	8.56786e-15	7.17414e-05	0	6.81767e-07	5.88945e-19	2.94061e-39	1.7468e-69	1.16939e-113	0	0	0	0	0	0	0	0	0
								11	3.48514e-160	1.75268e-98	3.27832e-59	3.15769e-32	1.608e-14	9.51054e-05	0	4.64584e-07	2.80859e-19	9.313e-40	3.28165e-70	9.58858e-115	0	0	0	0	0	0	0	0	0
								12	1.72805e-158	1.54066e-97	1.4489e-58	8.67389e-32	2.99603e-14	0.000125234	0	3.14428e-07	1.32931e-19	2.92291e-40	6.089e-71	7.67769e-116	0	0	0	0	0	0	0	0	0
								13	7.89585e-157	1.33035e-96	6.33413e-58	2.3627e-31	5.54196e-14	0.000163805	0	2.11351e-07	6.24422e-20	9.09069e-41	1.11572e-71	6.00032e-117	0	0	0	0	0	0	0	0	0
								14	3.34446e-155	1.12872e-95	2.73924e-57	6.38218e-31	1.01775e-13	0.000212822	0	1.41094e-07	2.91095e-20	2.80166e-41	2.01872e-72	4.57472e-118	0	0	0	0	0	0	0	0	0
								15	1.31995e-153	9.41177e-95	1.17192e-56	1.70965e-30	1.85562e-13	0.000274661	0.0201564	9.35474e-08	1.34675e-20	8.5556e-42	3.60626e-73	3.40067e-119	0	0	0	0	0	0	0	0	0
								16	4.87555e-152	7.7148e-94	4.96044e-56	4.54191e-30	3.35902e-13	0.000352102	0.0185618	6.15982e-08	6.18341e-21	2.58871e-42	6.35988e-74	2.46339e-120	0	0	0	0	0	0	0	0	0
								17	1.6921e-150	6.2179e-93	2.07745e-55	1.19667e-29	6.03695e-13	0.00044837	0.0169808	4.02822e-08	2.81738e-21	7.76059e-43	1.10714e-74	1.73784e-121	0	0	0	0	0	0	0	0	0
								18	5.53693e-149	4.9286e-92	8.60909e-55	3.12701e-29	1.07723e-12	0.000567155	0.0154322	2.61615e-08	1.27389e-21	2.30496e-43	1.90222e-75	1.19323e-122	0	0	0	0	0	0	0	0	0
								19	1.71354e-147	3.84288e-91	3.53045e-54	8.10433e-29	1.90853e-12	0.000712633	0.0139326	1.68738e-08	5.71578e-22	6.78219e-44	3.22535e-76	7.96887e-124	0	0	0	0	0	0	0	0	0
								20	5.02923e-146	2.94804e-90	1.43277e-53	2.08329e-28	3.35727e-12	0.000889472	0.0124958	1.08084e-08	2.54488e-22	1.97694e-44	5.39625e-77	5.17278e-125	0	0	0	0	0	0	0	0	0
								21	1.40339e-144	2.22556e-89	5.75478e-53	5.31178e-28	5.86383e-12	0.00110281	0.0111333	6.87541e-09	1.12434e-22	5.70835e-45	8.90744e-78	3.2613e-126	0	0	0	0	0	0	0	0	0
								22	3.73175e-143	1.65372e-88	2.28776e-52	1.34339e-27	1.01693e-11	0.00135824	0.009854	4.34334e-09	4.92899e-23	1.63269e-45	1.45045e-78	1.99555e-127	0	0	0	0	0	0	0	0	0
								23	9.4754e-142	1.2097e-87	9.00224e-52	3.37011e-27	1.75112e-11	0.00166174	0.0086642	2.72477e-09	2.14405e-23	4.62537e-46	2.32959e-79	1.18409e-128	0	0	0	0	0	0	0	0	0
								24	2.30173e-140	8.71314e-87	3.50652e-51	8.38654e-27	2.9941e-11	0.00201955	0.00756781	1.69752e-09	9.2538e-24	1.29783e-46	3.68999e-80	6.80751e-130	0	0	0	0	0	0	0	0	0
								25	5.35843e-139	6.18052e-86	1.35211e-50	2.07028e-26	5.08332e-11	0.00243815	0.00656653	1.0502e-09	3.96281e-24	3.60661e-47	5.76342e-81	3.78853e-131	0	0	0	0	0	0	0	0	0
								26	1.1974e-137	4.31823e-85	5.16164e-50	5.06983e-26	8.56966e-11	0.00292402	0.00566011	6.45202e-10	1.68373e-24	9.92577e-48	8.87523e-82	2.03897e-132	0	0	0	0	0	0	0	0	0
								27	2.5722e-136	2.97229e-84	1.95086e-49	1.23165e-25	1.43457e-10	0.00348349	0.00484657	3.93624e-10	7.09768e-25	2.70514e-48	1.34728e-82	1.06012e-133	0	0	0	0	0	0	0	0	0
								28	5.31894e-135	2.01582e-83	7.30047e-49	2.96842e-25	2.38466e-10	0.00412254	0.00412254	2.38466e-10	2.96842e-25	7.30047e-49	2.01582e-83	5.31894e-135	0	0	0	0	0	0	0	0	0
								29	1.06012e-133	1.34728e-82	2.70514e-48	7.09768e-25	3.93624e-10	0.00484657	0.00348349	1.43457e-10	1.23165e-25	1.95086e-49	2.97229e-84	2.5722e-136	0	0	0	0	0	0	0	0	0
								30	2.03897e-132	8.87523e-82	9.92577e-48	1.68373e-24	6.45202e-10	0.00566011	0.00292402	8.56966e-11	5.06983e-26	5.16164e-50	4.31823e-85	1.1974e-137	0	0	0	0	0	0	0	0	0
								31	3.78853e-131	5.76342e-81	3.60661e-47	3.96281e-24	1.0502e-09	0.00656653	0.00243815	5.08332e-11	2.07028e-26	1.35211e-50	6.18052e-86	5.35843e-139	0	0	0	0	0	0	0	0	0
								32	6.80751e-130	3.68999e-80	1.29783e-46	9.2538e-24	1.69752e-09	0.00756781	0.00201955	2.9941e-11	8.38654e-27	3.50652e-51	8.71314e-87	2.30173e-140	0	0	0	0	0	0	0	0	0
								33	1.18409e-128	2.32959e-79	4.62537e-46	2.14405e-23	2.72477e-09	0.0086642	0.00166174	1.75112e-11	3.37011e-27	9.00224e-52	1.2097e-87	9.4754e-142	0	0	0	0	0	0	0	0	0
								34	1.99555e-127	1.45045e-78	1.63269e-45	4.92899e-23	4.34334e-09	0.009854	0.00135824	1.01693e-11	1.34339e-27	2.28776e-52	1.65372e-88	3.73175e-143	0	0	0	0	0	0	0	0	0
								35	3.2613e-126	8.90744e-78	5.70835e-45	1.12434e-22	6.87541e-09	0.0111333	0.00110281	5.86383e-12	5.31178e-28	5.75478e-53	2.22556e-89	1.40339e-144	0	0	0	0	0	0	0	0	0
								36	5.17278e-125	5.39625e-77	1.97694e-44	2.54488e-22	1.08084e-08	0.0124958	0.000889472	3.35727e-12	2.08329e-28	1.43277e-53	2.94804e-90	5.02923e-146	0	0	0	0	0	0	0	0	0
								37	7.96887e-124	3.22535e-76	6.78219e-44	5.71578e-22	1.68738e-08	0.0139326	0.000712633	1.90853e-12	8.10433e-29	3.53045e-54	3.84288e-91	1.71354e-147	0	0	0	0	0	0	0	0	0
								38	1.19323e-122	1.90222e-75	2.30496e-43	1.27389e-21	2.61615e-08	0.0154322	0.000567155	1.07723e-12	3.12701e-29	8.60909e-55	4.9286e-92	5.53693e-149	0	0	0	0	0	0	0	0	0
								39	1.73784e-121	1.10714e-74	7.76059e-43	2.81738e-21	4.02822e-08	0.0169808	0.00044837	6.03695e-13	1.19667e-29	2.07745e-55	6.2179e-93	1.6921e-150	0	0	0	0	0	0	0	0	0
								40	2.46339e-120	6.35988e-74	2.58871e-42	6.18341e-21	6.15982e-08	0.0185618	0.000352102	3.35902e-13	4.54191e-30	4.96044e-56	7.7148e-94	4.87555e-152	0	0	0	0	0	0	0	0	0
								41	3.40067e-119	3.60626e-73	8.5556e-42	1.34675e-20	9.35474e-08	0.0201564	0.000274661	1.85562e-13	1.70965e-30	1.17192e-56	9.41177e-95	1.31995e-153	0	0	0	0	0	0	0	0	0
								42	4.57472e-118	2.01872e-72	2.80166e-41	2.91095e-20	1.41094e-07	0	0.000212822	1.01775e-13	6.38218e-31	2.73924e-57	1.12872e-95	3.34446e-155	0	0	0	0	0	0	0	0	0
								43	6.00032e-117	1.11572e-71	9.09069e-41	6.24422e-20	2.11351e-07	0	0.000163805	5.54196e-14	2.3627e-31	6.33413e-58	1.33035e-96	7.89585e-157	0	0	0	0	0	0	0	0	0
								44	7.67769e-116	6.089e-71	2.92291e-40	1.32931e-19	3.14428e-07	0	0.000125234	2.99603e-14	8.67389e-32	1.4489e-58	1.54066e-97	1.72805e-158	0	0	0	0	0	0	0	0	0
								45	9.58858e-115	3.28165e-70	9.313e-40	2.80859e-19	4.64584e-07	0	9.51054e-05	1.608e-14	3.15769e-32	3.27832e-59	1.75268e-98	3.48514e-160	0	0	0	0	0	0	0	0	0
								46	1.16939e-113	1.7468e-69	2.94061e-39	5.88945e-19	6.81767e-07	0	7.17414e-05	8.56786e-15	1.13988e-32	7.33657e-60	1.95812e-99	6.4323e-162	0	0	0	0	0	0	0	0	0
								47	1.39332e-112	9.18418e-69	9.20191e-39	1.22572e-18	9.93668e-07	0	5.37544e-05	4.53212e-15	4.08012e-33	1.62379e-60	2.14785e-100	1.07744e-163	0	0	0	0	0	0	0	0	0
								48	1.62263e-111	4.77015e-68	2.85384e-38	2.53192e-18	1.43842e-06	0	4.00068e-05	2.37993e-15	1.44808e-33	3.55407e-61	2.31246e-101	1.62156e-165	0	0	0	0	0	0	0	0	0
								49	1.84781e-110	2.44771e-67	8.77219e-38	5.19108e-18	2.06808e-06	0	2.95753e-05	1.24067e-15	5.09568e-34	7.69218e-62	2.44304e-102	2.16569e-167	0	0	0	0	0	0	0	0	0

## Sheet: 3.2_Fisher exact test
This spreadsheet performs Fisher's exact test for a 2x2 table.
For more information, see http://udel.edu/~mcdonald/statfishers.html.
The spreadsheet comes with the Adh data from that web page entered as an example.
To use it, replace the Adh data with your numbers.
The smaller column total must be less than 500.
	P-value:	0.00122154
	LIVE	DIE	SUM	row totals
wtf46Δ/wtf46+	606	74	680	680
wtf46Δ/wtf46Δ	439	25	464	464
column totals	1045	99		1144
	column 1	column 2		row totals
row 1	25	439		464
row 2	74	606		680
column totals	99	1045		1144
smaller column	25	74	99	0.000366784
	0	1.86803e-24	1.86803e-24
	1	1.4744e-22	1.4744e-22
	2	5.73751e-21	5.73751e-21
	3	1.46758e-19	1.46758e-19
	4	2.77562e-18	2.77562e-18
	5	4.13974e-17	4.13974e-17
	6	5.07136e-16	5.07136e-16
	7	5.24804e-15	5.24804e-15
	8	4.6827e-14	4.6827e-14
	9	3.65938e-13	3.65938e-13
	10	2.53556e-12	2.53556e-12
	11	1.57328e-11	1.57328e-11
	12	8.81355e-11	8.81355e-11
	13	4.48827e-10	4.48827e-10
	14	2.08982e-09	2.08982e-09
	15	8.94134e-09	8.94134e-09
	16	3.53048e-08	3.53048e-08
	17	1.29134e-07	1.29134e-07
	18	4.38997e-07	4.38997e-07
	19	1.39116e-06	1.39116e-06
	20	4.12024e-06	4.12024e-06
	21	1.14319e-05	1.14319e-05
	22	2.97766e-05	2.97766e-05
	23	7.29497e-05	7.29497e-05
	24	0.000168387	0.000168387
	25	0.000366784	0.000366784
	26	0.000754995
	27	0.00147053
	28	0.00271339
	29	0.00474821
	30	0.00788777
	31	0.0124503
	32	0.0186882
	33	0.0266958
	34	0.036317
	35	0.0470807
	36	0.0581959
	37	0.0686257
	38	0.0772382
	39	0.0830071
	40	0.0852126
	41	0.0835886
	42	0.0783751
	43	0.0702607
	44	0.0602352
	45	0.0493941
	46	0.0387487
	47	0.0290839
	48	0.0208881
	49	0.0143558
	50	0.00944159
	51	0.0059423
	52	0.00357881
	53	0.00206238
	54	0.00113711
	55	0.00059976
	56	0.00030257	0.00030257
	57	0.000145968	0.000145968
	58	6.73246e-05	6.73246e-05
	59	2.96792e-05	2.96792e-05
	60	1.25014e-05	1.25014e-05
	61	5.02966e-06	5.02966e-06
	62	1.93208e-06	1.93208e-06
	63	7.08314e-07	7.08314e-07
	64	2.47704e-07	2.47704e-07
	65	8.25877e-08	8.25877e-08
	66	2.62373e-08	2.62373e-08
	67	7.93718e-09	7.93718e-09
	68	2.28483e-09	2.28483e-09
	69	6.25385e-10	6.25385e-10
	70	1.62625e-10	1.62625e-10
	71	4.01398e-11	4.01398e-11
	72	9.39464e-12	9.39464e-12
	73	2.08271e-12	2.08271e-12
	74	4.36824e-13	4.36824e-13
	75	8.65657e-14	8.65657e-14
	76	1.61856e-14	1.61856e-14
	77	2.85083e-15	2.85083e-15
	78	4.72198e-16	4.72198e-16
	79	7.34108e-17	7.34108e-17
	80	1.06895e-17	1.06895e-17
	81	1.45446e-18	1.45446e-18
	82	1.84436e-19	1.84436e-19
	83	2.17326e-20	2.17326e-20
	84	2.37167e-21	2.37167e-21
	85	2.38801e-22	2.38801e-22
	86	2.20892e-23	2.20892e-23
	87	1.86775e-24	1.86775e-24
	88	1.43527e-25	1.43527e-25
	89	9.95517e-27	9.95517e-27
	90	6.1818e-28	6.1818e-28
	91	3.40266e-29	3.40266e-29
	92	1.63989e-30	1.63989e-30
	93	6.81259e-32	6.81259e-32
	94	2.39004e-33	2.39004e-33
	95	6.88505e-35	6.88505e-35
	96	1.56363e-36	1.56363e-36
	97	2.62483e-38	2.62483e-38
	98	2.89535e-40	2.89535e-40
	99	1.57412e-42	1.57412e-42
	100
	101
	102
	103
	104
	105
	106
	107
	108
	109
	110
	111
	112
	113
	114
	115
	116
	117
	118
	119
	120
	121
	122
	123
	124
	125
	126
	127
	128
	129
	130
	131
	132
	133
	134
	135
	136
	137
	138
	139
	140
	141
	142
	143
	144
	145
	146
	147
	148
	149
	150
	151
	152
	153
	154
	155
	156
	157
	158
	159
	160
	161
	162
	163
	164
	165
	166
	167
	168
	169
	170
	171
	172
	173
	174
	175
	176
	177
	178
	179
	180
	181
	182
	183
	184
	185
	186
	187
	188
	189
	190
	191
	192
	193
	194
	195
	196
	197
	198
	199
	200
	201
	202
	203
	204
	205
	206
	207
	208
	209
	210
	211
	212
	213
	214
	215
	216
	217
	218
	219
	220
	221
	222
	223
	224
	225
	226
	227
	228
	229
	230
	231
	232
	233
	234
	235
	236
	237
	238
	239
	240
	241
	242
	243
	244
	245
	246
	247
	248
	249
	250
	251
	252
	253
	254
	255
	256
	257
	258
	259
	260
	261
	262
	263
	264
	265
	266
	267
	268
	269
	270
	271
	272
	273
	274
	275
	276
	277
	278
	279
	280
	281
	282
	283
	284
	285
	286
	287
	288
	289
	290
	291
	292
	293
	294
	295
	296
	297
	298
	299
	300
	301
	302
	303
	304
	305
	306
	307
	308
	309
	310
	311
	312
	313
	314
	315
	316
	317
	318
	319
	320
	321
	322
	323
	324
	325
	326
	327
	328
	329
	330
	331
	332
	333
	334
	335
	336
	337
	338
	339
	340
	341
	342
	343
	344
	345
	346
	347
	348
	349
	350
	351
	352
	353
	354
	355
	356
	357
	358
	359
	360
	361
	362
	363
	364
	365
	366
	367
	368
	369
	370
	371
	372
	373
	374
	375
	376
	377
	378
	379
	380
	381
	382
	383
	384
	385
	386
	387
	388
	389
	390
	391
	392
	393
	394
	395
	396
	397
	398
	399
	400
	401
	402
	403
	404
	405
	406
	407
	408
	409
	410
	411
	412
	413
	414
	415
	416
	417
	418
	419
	420
	421
	422
	423
	424
	425
	426
	427
	428
	429
	430
	431
	432
	433
	434
	435
	436
	437
	438
	439
	440
	441
	442
	443
	444
	445
	446
	447
	448
	449
	450
	451
	452
	453
	454
	455
	456
	457
	458
	459
	460
	461
	462
	463
	464
	465
	466
	467
	468
	469
	470
	471
	472
	473
	474
	475
	476
	477
	478
	479
	480
	481
	482
	483
	484
	485
	486
	487
	488
	489
	490
	491
	492
	493
	494
	495
	496
	497
	498
	499
	500
