# Supplementary material for: The wtf meiotic driver gene family has unexpectedly persisted for over 100 million years
Source: eLife. 2022 Oct 13;11:e81149. doi: 10.7554/eLife.81149 (PMC9562144; doi:10.7554/eLife.81149)
Supplement: Figure 9—source data 1. — Octad analysis table with spore viability of wtf25+/wtf25Δ heterozygous cross can be found in Table 1.1. Corresponding octad genotypes are found in Table 1.2. Spore viability data of homozygous diploid are in Table 2. Exact binomial test was performed in Table 3.1, and the Fisher’s exact test is calculated in Table 3.2. [file elife-81149-fig9-data1.xlsx]

## Sheet: 1.1_Heterozygous viability
Cross ID	Total octad	Successful octad	Total spore (In successful octad)	Viable spore (In successful octad)	Viable Marker-Resistance (In successful octad)	Viable Marker-Sensitive (In successful octad)	Note
DY47906 cross 1	11	11	88	53	16	37
DY47906 cross 2	11	11	88	60	19	41
DY47906 cross 3	10	10	80	49	15	34
DY47906 cross 4	7	7	56	29	6	23
DY47906 cross 5	11	11	88	63	20	43
DY47906 cross 6	11	11	88	71	27	44
DY47906 cross 7	11	11	88	71	28	43
DY47905 cross 1	11	10	80	47	16	31
DY47905 cross 2	11	11	88	64	23	41
DY47905 cross 3	11	10	80	55	16	39
DY47905 cross 4	5	5	40	31	13	18
DY47905 cross 5	11	11	88	54	17	37
DY47905 cross 6	11	11	88	60	18	42	For manuscript figure
DY47905 cross 7	11	11	88	69	25	44
DY47905 cross 8	10	10	80	54	19	35
	153	151	1208	830	278	552
Total viability	68.7086
		Viable_MarkerR (deletion)	Total-Viable_MarkerR		MarkerR viability
		278	930		0.230132
		Viable-Viable_MarkerR (WT)	Total-(Viable-Viable_MarkerR)		MarkerS viability
		552	656		0.456954
					wtf25Δ	wtf25+
				spores that are viable and with the indicated genotype	23.0132	45.6954

## Sheet: 1.2_Octad_genotyping
	4R4S	4R3S	3R4S	4R2S	2R4S	3R3S	4R1S	1R4S	3R2S	2R3S	3R1S	1R3S	2R2S	4R	4S	<= 3 viable spore	total
DY47906 cross 1	1		1		2			3							1	3	11
DY47906 cross 2	1		2		2			1	1			1			3		11
DY47906 cross 3					1	1		4		2			1			1	10
DY47906 cross 4			1					2				1			1	2	7
DY47906 cross 5	1		2		2	1		3							2		11
DY47906 cross 6	2		3		4			2									11
DY47906 cross 7	2	1	2		5										1		11
DY47905 cross 1	1				1			2		3		1				2	10
DY47905 cross 2	1		3			1		3		2					1		11
DY47905 cross 3	1				3	1		3							2		10
DY47905 cross 4	1				1	2		1									5
DY47905 cross 5					3	1		4					1		1	1	11
DY47905 cross 6	1		2		1			5							1	1	11
DY47905 cross 7	3		2		2			3							1		11
DY47905 cross 8	1		2		2			1		1			1		2		10
	16	1	20	0	29	7	0	37	1	8	0	3	3	0	16	10	151
Genotype	4R4S	4R3S	3R4S	4R2S	2R4S	3R3S	4R1S	1R4S	3R2S	2R3S	3R1S	1R3S	2R2S	4R0S	0R4S	<= 3 viable spore
Number	16	1	20	0	29	7	0	37	1	8	0	3	3	0	16	10

## Sheet: 2_Homozygous viability
Cross ID	Total octad	Successful octad	Total spore (In successful octad)	Viable spore (In successful octad)	Viable Marker-Resistance (In successful octad)	Viable Marker-Sensitive (In successful octad)
DY47906 × DY47905 -1	11	11	88	77	77	0
DY47906 × DY47905 -2	11	11	88	75	75	0
DY47906 × DY47905 -3	10	10	80	68	68	0
DY47906 × DY47905 -4	10	10	80	65	65	0
DY47906 × DY47905 -5	11	11	88	85	85	0
DY47906 × DY47905 -6	11	11	88	86	86	0
DY47906 × DY47905 -7	11	11	88	82	82	0
DY47906 × DY47905 -8	10	10	80	77	77	0
	85	85	680	615	615	0
Total viability	90.4412

## Sheet: 3.1_exact binomial test
This spreadsheet performs the exact binomial test of goodness-of-fit.
It comes with the wasp data from http://www.biostathandbook.com/exactgof.html entered as an example.
To use it, replace the wasp data with your observed numbers, and replace the wasp ratio (1:1) with your expected ratio.
The expected ratio can be any numbers you want, as long as the ratio is correct.
For example, if you've done a genetic cross with an expected 3:1 ratio, you could enter 3 and 1, or 0.75 and 0.25, or 75 and 25.
The result in column F is the P-value for a two-tailed test, which is almost always what you want.
The result in column G is the P-value for a one-tailed test, which is almost never what you want.
For more details see http://www.biostathandbook.com/exactgof.html
	observed numbers	expected proportions		expected numbers	P-value (two-tailed)	P-value (one tailed)		n	p	q	exp 1	exp2	point prob
wtf25+	552	1		415	1.13369e-21	5.66844e-22		830	0.5	0.5	415	415	2.83401e-22
wtf25Δ	278	1		415				0
								5.66844e-22
								5.66844e-22
	observed numbers	expected proportions		expected numbers	P-value (two-tailed)	P-value (one tailed)		n	p	q	exp 1	exp2	point prob
4R3S octad	1	1		10.5	2.09808e-05	1.04904e-05		21	0.5	0.5	10.5	10.5
3R4S octad	20	1		10.5
	observed numbers	expected proportions		expected numbers	P-value (two-tailed)	P-value (one tailed)		n	p	q	exp 1	exp2	point prob
4R2S octad	0	1		14.5	3.72529e-09	1.86265e-09		29	0.5	0.5	14.5	14.5
2R4S octad	29	1		14.5
	observed numbers	expected proportions		expected numbers	P-value (two-tailed)	P-value (one tailed)		n	p	q	exp 1	exp2	point prob
4R1S octad	0	1		18.5	1.45519e-11	7.27596e-12		37	0.5	0.5	18.5	18.5
1R4S octad	37	1		18.5
	observed numbers	expected proportions		expected numbers	P-value (two-tailed)	P-value (one tailed)		n	p	q	exp 1	exp2	point prob
4R0S octad	0	1		8	3.05176e-05	1.52588e-05		16	0.5	0.5	8	8
0R4S octad	16	1		8
									0	50	100	150	200	250	300	350	400	450	500	550	600	650	700	750	800	850	900	950	1000
								0	1.3967e-250	9.15841e-170	2.41353e-119	1.03769e-81	5.00546e-53	1.53562e-31	0	0	0	0	0	0	2.41048e-39	1.45657e-63	1.51112e-95	1.28142e-137	1.15725e-195	0	0	0	0
								1	1.15926e-247	1.4007e-168	1.74443e-118	4.67305e-81	1.56888e-52	3.54844e-31	0	0	0	0	0	0	9.22479e-40	4.02738e-64	2.80236e-96	1.36502e-138	4.33428e-197	0	0	0	0
								2	4.80514e-245	2.09835e-167	1.24675e-117	2.0875e-80	4.88526e-52	8.15297e-31	0	0	0	0	0	2.83401e-22	3.5091e-40	1.10568e-64	5.14963e-97	1.434e-139	1.56726e-198	0	0	0	0
								3	1.32622e-242	3.08022e-166	8.81201e-117	9.2505e-80	1.5113e-51	1.86261e-30	0	0	0	0	0	1.42469e-22	1.32682e-40	3.01394e-65	9.37629e-98	1.48542e-140	5.46492e-200	0	0	0	0
								4	2.74196e-240	4.4321e-165	6.15994e-116	4.06662e-79	4.64503e-51	4.23122e-30	0	0	0	0	0	7.12346e-23	4.98657e-41	8.15699e-66	1.69146e-98	1.51694e-141	1.83523e-201	0	0	0	0
								5	4.52971e-238	6.25329e-164	4.25916e-115	1.77357e-78	1.41843e-50	9.55757e-30	0	0	0	0	0	3.54248e-23	1.86275e-41	2.1918e-66	3.02304e-99	1.52699e-142	5.92746e-203	0	0	0	0
								6	6.22836e-236	8.65411e-163	2.9131e-114	7.6741e-78	4.3035e-50	2.14672e-29	0	0	0	0	0	1.75212e-23	6.91616e-42	5.84703e-67	5.3524e-100	1.51487e-143	1.83854e-204	0	0	0	0
								7	7.33167e-234	1.17514e-161	1.97111e-113	3.29449e-77	1.29729e-49	4.79462e-29	0	0	0	0	0	8.61907e-24	2.55226e-42	1.54853e-67	9.38752e-101	1.48085e-144	5.46778e-206	0	0	0	0
								8	7.54245e-232	1.56617e-160	1.31955e-112	1.40328e-76	3.88563e-49	1.06485e-28	0	0	0	0	0	4.21685e-24	9.36107e-43	4.07136e-68	1.63088e-101	1.42615e-145	1.55642e-207	0	0	0	0
								9	6.88877e-230	2.0493e-159	8.74049e-112	5.93086e-76	1.15639e-48	2.35172e-28	0	0	0	0	0	2.05185e-24	3.41241e-43	1.06263e-68	2.80632e-102	1.35287e-146	4.23255e-209	0	0	0	0
								10	5.65568e-228	2.63335e-158	5.72899e-111	2.48726e-75	3.41962e-48	5.16473e-28	0	0	0	0	0	9.92949e-25	1.2363e-43	2.75318e-69	4.78259e-103	1.26386e-147	1.09733e-210	0	0	0	0
								11	4.21605e-226	3.32406e-157	3.7161e-110	1.03507e-74	1.00482e-47	1.12793e-27	0	0	0	0	0	4.7789e-25	4.45149e-44	7.0808e-70	8.07189e-104	1.16255e-148	2.70611e-212	0	0	0	0
								12	2.87746e-224	4.12291e-156	2.38561e-109	4.27445e-74	2.93387e-47	2.44959e-27	0	0	0	0	0	2.28741e-25	1.59293e-44	1.80764e-70	1.34909e-104	1.05271e-149	6.33203e-214	0	0	0	0
								13	1.81058e-222	5.02602e-155	1.51581e-108	1.75174e-73	8.51237e-47	5.29037e-27	0	0	0	0	0	1.08886e-25	5.66492e-45	4.58043e-71	2.23272e-105	9.38191e-151	1.40193e-215	0	0	0	0
								14	1.05661e-220	6.02338e-154	9.53365e-108	7.12445e-73	2.45427e-46	1.13623e-26	0	0	0	0	0	5.15469e-26	2.0021e-45	1.15201e-71	3.65866e-106	8.2276e-152	2.92785e-217	0	0	0	0
								15	5.74793e-219	7.09832e-153	5.93573e-107	2.87569e-72	7.03176e-46	2.42681e-26	0	0	0	0	0	2.42681e-26	7.03176e-46	2.87569e-72	5.93573e-107	7.09832e-153	5.74793e-219	0	0	0	0
								16	2.92785e-217	8.2276e-152	3.65866e-106	1.15201e-71	2.0021e-45	5.15469e-26	0	0	0	0	0	1.13623e-26	2.45427e-46	7.12445e-73	9.53365e-108	6.02338e-154	1.05661e-220	0	0	0	0
								17	1.40193e-215	9.38191e-151	2.23272e-105	4.58043e-71	5.66492e-45	1.08886e-25	0	0	0	0	0	5.29037e-27	8.51237e-47	1.75174e-73	1.51581e-108	5.02602e-155	1.81058e-222	0	0	0	0
								18	6.33203e-214	1.05271e-149	1.34909e-104	1.80764e-70	1.59293e-44	2.28741e-25	0	0	0	0	0	2.44959e-27	2.93387e-47	4.27445e-74	2.38561e-109	4.12291e-156	2.87746e-224	0	0	0	0
								19	2.70611e-212	1.16255e-148	8.07189e-104	7.0808e-70	4.45149e-44	4.7789e-25	0	0	0	0	0	1.12793e-27	1.00482e-47	1.03507e-74	3.7161e-110	3.32406e-157	4.21605e-226	0	0	0	0
								20	1.09733e-210	1.26386e-147	4.78259e-103	2.75318e-69	1.2363e-43	9.92949e-25	0	0	0	0	0	5.16473e-28	3.41962e-48	2.48726e-75	5.72899e-111	2.63335e-158	5.65568e-228	0	0	0	0
								21	4.23255e-209	1.35287e-146	2.80632e-102	1.06263e-68	3.41241e-43	2.05185e-24	0	0	0	0	0	2.35172e-28	1.15639e-48	5.93086e-76	8.74049e-112	2.0493e-159	6.88877e-230	0	0	0	0
								22	1.55642e-207	1.42615e-145	1.63088e-101	4.07136e-68	9.36107e-43	4.21685e-24	0	0	0	0	0	1.06485e-28	3.88563e-49	1.40328e-76	1.31955e-112	1.56617e-160	7.54245e-232	0	0	0	0
								23	5.46778e-206	1.48085e-144	9.38752e-101	1.54853e-67	2.55226e-42	8.61907e-24	0	0	0	0	0	4.79462e-29	1.29729e-49	3.29449e-77	1.97111e-113	1.17514e-161	7.33167e-234	0	0	0	0
								24	1.83854e-204	1.51487e-143	5.3524e-100	5.84703e-67	6.91616e-42	1.75212e-23	0	0	0	0	0	2.14672e-29	4.3035e-50	7.6741e-78	2.9131e-114	8.65411e-163	6.22836e-236	0	0	0	0
								25	5.92746e-203	1.52699e-142	3.02304e-99	2.1918e-66	1.86275e-41	3.54248e-23	0	0	0	0	0	9.55757e-30	1.41843e-50	1.77357e-78	4.25916e-115	6.25329e-164	4.52971e-238	0	0	0	0
								26	1.83523e-201	1.51694e-141	1.69146e-98	8.15699e-66	4.98657e-41	7.12346e-23	0	0	0	0	0	4.23122e-30	4.64503e-51	4.06662e-79	6.15994e-116	4.4321e-165	2.74196e-240	0	0	0	0
								27	5.46492e-200	1.48542e-140	9.37629e-98	3.01394e-65	1.32682e-40	1.42469e-22	0	0	0	0	0	1.86261e-30	1.5113e-51	9.2505e-80	8.81201e-117	3.08022e-166	1.32622e-242	0	0	0	0
								28	1.56726e-198	1.434e-139	5.14963e-97	1.10568e-64	3.5091e-40	2.83401e-22	0	0	0	0	0	8.15297e-31	4.88526e-52	2.0875e-80	1.24675e-117	2.09835e-167	4.80514e-245	0	0	0	0
								29	4.33428e-197	1.36502e-138	2.80236e-96	4.02738e-64	9.22479e-40	0	0	0	0	0	0	3.54844e-31	1.56888e-52	4.67305e-81	1.74443e-118	1.4007e-168	1.15926e-247	0	0	0	0
								30	1.15725e-195	1.28142e-137	1.51112e-95	1.45657e-63	2.41048e-39	0	0	0	0	0	0	1.53562e-31	5.00546e-53	1.03769e-81	2.41353e-119	9.15841e-170	1.3967e-250	0	0	0	0
								31	2.98646e-194	1.1865e-136	8.07468e-95	5.23077e-63	6.26098e-39	0	0	0	0	0	0	6.60765e-32	1.58652e-53	2.28567e-82	3.30168e-120	5.86326e-171	0	0	0	0	0
								32	7.45682e-193	1.08376e-135	4.27591e-94	1.86526e-62	1.61652e-38	0	0	0	0	0	0	2.82699e-32	4.99552e-54	4.99361e-83	4.46539e-121	3.67391e-172	0	0	0	0	0
								33	1.80319e-191	9.76693e-135	2.24405e-93	6.60484e-62	4.14884e-38	0	0	0	0	0	0	1.20256e-32	1.56258e-54	1.08207e-83	5.97009e-122	2.25221e-173	0	0	0	0	0
								34	4.2269e-190	8.68559e-134	1.16724e-92	2.32246e-61	1.05849e-37	0	0	0	0	0	0	5.08617e-33	4.85533e-55	2.3255e-84	7.88963e-123	1.35017e-174	0	0	0	0	0
								35	9.61318e-189	7.62288e-133	6.01777e-92	8.10979e-61	2.6845e-37	0	0	0	0	0	0	2.1388e-33	1.49865e-55	4.95655e-85	1.03048e-123	7.91185e-176	0	0	0	0	0
								36	2.12291e-187	6.60354e-132	3.07526e-91	2.81227e-60	6.76813e-37	0	0	0	0	0	0	8.94208e-34	4.59493e-56	1.04767e-85	1.33011e-124	4.52968e-177	0	0	0	0	0
								37	4.55565e-186	5.64717e-131	1.55783e-90	9.68503e-60	1.69632e-36	0	0	0	0	0	0	3.71698e-34	1.3994e-56	2.19598e-86	1.69647e-125	2.53248e-178	0	0	0	0	0
								38	9.50692e-185	4.76801e-130	7.82302e-90	3.31249e-59	4.22653e-36	0	0	0	0	0	0	1.5361e-34	4.23329e-57	4.56433e-87	2.13783e-126	1.38194e-179	0	0	0	0	0
								39	1.93064e-183	3.97512e-129	3.89463e-89	1.12519e-58	1.04691e-35	0	0	0	0	0	0	6.31131e-35	1.27197e-57	9.40689e-88	2.66144e-127	7.35632e-181	0	0	0	0	0
								40	3.81783e-182	3.27285e-128	1.92228e-88	3.79605e-58	2.57801e-35	0	0	0	0	0	0	2.57801e-35	3.79605e-58	1.92228e-88	3.27285e-128	3.81783e-182	0	0	0	0	0
								41	7.35632e-181	2.66144e-127	9.40689e-88	1.27197e-57	6.31131e-35	0	0	0	0	0	0	1.04691e-35	1.12519e-58	3.89463e-89	3.97512e-129	1.93064e-183	0	0	0	0	0
								42	1.38194e-179	2.13783e-126	4.56433e-87	4.23329e-57	1.5361e-34	0	0	0	0	0	0	4.22653e-36	3.31249e-59	7.82302e-90	4.76801e-130	9.50692e-185	0	0	0	0	0
								43	2.53248e-178	1.69647e-125	2.19598e-86	1.3994e-56	3.71698e-34	0	0	0	0	0	0	1.69632e-36	9.68503e-60	1.55783e-90	5.64717e-131	4.55565e-186	0	0	0	0	0
								44	4.52968e-177	1.33011e-124	1.04767e-85	4.59493e-56	8.94208e-34	0	0	0	0	0	0	6.76813e-37	2.81227e-60	3.07526e-91	6.60354e-132	2.12291e-187	0	0	0	0	0
								45	7.91185e-176	1.03048e-123	4.95655e-85	1.49865e-55	2.1388e-33	0	0	0	0	0	0	2.6845e-37	8.10979e-61	6.01777e-92	7.62288e-133	9.61318e-189	0	0	0	0	0
								46	1.35017e-174	7.88963e-123	2.3255e-84	4.85533e-55	5.08617e-33	0	0	0	0	0	0	1.05849e-37	2.32246e-61	1.16724e-92	8.68559e-134	4.2269e-190	0	0	0	0	0
								47	2.25221e-173	5.97009e-122	1.08207e-83	1.56258e-54	1.20256e-32	0	0	0	0	0	0	4.14884e-38	6.60484e-62	2.24405e-93	9.76693e-135	1.80319e-191	0	0	0	0	0
								48	3.67391e-172	4.46539e-121	4.99361e-83	4.99552e-54	2.82699e-32	0	0	0	0	0	0	1.61652e-38	1.86526e-62	4.27591e-94	1.08376e-135	7.45682e-193	0	0	0	0	0
								49	5.86326e-171	3.30168e-120	2.28567e-82	1.58652e-53	6.60765e-32	0	0	0	0	0	0	6.26098e-39	5.23077e-63	8.07468e-95	1.1865e-136	2.98646e-194	0	0	0	0	0

## Sheet: 3.2_Fisher exact test
This spreadsheet performs Fisher's exact test for a 2x2 table.
For more information, see http://udel.edu/~mcdonald/statfishers.html.
The spreadsheet comes with the Adh data from that web page entered as an example.
To use it, replace the Adh data with your numbers.
The smaller column total must be less than 500.
	P-value:	3.18605e-29
	LIVE	DIE	SUM	row totals
wtf25Δ/wtf25+	830	378	1208	1208
wtf25Δ/wtf25Δ	615	65	680	680
column totals	1445	443		1888
	column 1	column 2		row totals
row 1	65	615		680
row 2	378	830		1208
column totals	443	1445		1888
smaller column	65	378	443	1.46669e-29
	0	1.24241e-102	1.24241e-102
	1	4.88595e-100	4.88595e-100
	2	9.55907e-98	9.55907e-98
	3	1.24051e-95	1.24051e-95
	4	1.20131e-93	1.20131e-93
	5	9.25991e-92	9.25991e-92
	6	5.91806e-90	5.91806e-90
	7	3.22556e-88	3.22556e-88
	8	1.53051e-86	1.53051e-86
	9	6.42262e-85	6.42262e-85
	10	2.41336e-83	2.41336e-83
	11	8.20221e-82	8.20221e-82
	12	2.54237e-80	2.54237e-80
	13	7.23718e-79	7.23718e-79
	14	1.90326e-77	1.90326e-77
	15	4.64776e-76	4.64776e-76
	16	1.05862e-74	1.05862e-74
	17	2.25776e-73	2.25776e-73
	18	4.52447e-72	4.52447e-72
	19	8.54564e-71	8.54564e-71
	20	1.5255e-69	1.5255e-69
	21	2.58021e-68	2.58021e-68
	22	4.14434e-67	4.14434e-67
	23	6.33445e-66	6.33445e-66
	24	9.23072e-65	9.23072e-65
	25	1.28465e-63	1.28465e-63
	26	1.71023e-62	1.71023e-62
	27	2.18112e-61	2.18112e-61
	28	2.66842e-60	2.66842e-60
	29	3.13568e-59	3.13568e-59
	30	3.54343e-58	3.54343e-58
	31	3.8549e-57	3.8549e-57
	32	4.04154e-56	4.04154e-56
	33	4.0874e-55	4.0874e-55
	34	3.99125e-54	3.99125e-54
	35	3.76623e-53	3.76623e-53
	36	3.4371e-52	3.4371e-52
	37	3.03596e-51	3.03596e-51
	38	2.59737e-50	2.59737e-50
	39	2.15379e-49	2.15379e-49
	40	1.73215e-48	1.73215e-48
	41	1.35193e-47	1.35193e-47
	42	1.02461e-46	1.02461e-46
	43	7.5447e-46	7.5447e-46
	44	5.40058e-45	5.40058e-45
	45	3.75987e-44	3.75987e-44
	46	2.54713e-43	2.54713e-43
	47	1.67987e-42	1.67987e-42
	48	1.07906e-41	1.07906e-41
	49	6.75364e-41	6.75364e-41
	50	4.12036e-40	4.12036e-40
	51	2.45137e-39	2.45137e-39
	52	1.42272e-38	1.42272e-38
	53	8.05799e-38	8.05799e-38
	54	4.45535e-37	4.45535e-37
	55	2.40563e-36	2.40563e-36
	56	1.26885e-35	1.26885e-35
	57	6.53971e-35	6.53971e-35
	58	3.29462e-34	3.29462e-34
	59	1.62285e-33	1.62285e-33
	60	7.81799e-33	7.81799e-33
	61	3.68448e-32	3.68448e-32
	62	1.69915e-31	1.69915e-31
	63	7.66964e-31	7.66964e-31
	64	3.3893e-30	3.3893e-30
	65	1.46669e-29	1.46669e-29
	66	6.2167e-29
	67	2.5815e-28
	68	1.05043e-27
	69	4.18922e-27
	70	1.6378e-26
	71	6.27821e-26
	72	2.36014e-25
	73	8.70259e-25
	74	3.14808e-24
	75	1.11739e-23
	76	3.89222e-23
	77	1.33075e-22
	78	4.46657e-22
	79	1.47195e-21
	80	4.76346e-21
	81	1.514e-20
	82	4.72676e-20
	83	1.44977e-19
	84	4.36906e-19
	85	1.29387e-18
	86	3.76585e-18
	87	1.07735e-17
	88	3.02992e-17
	89	8.37787e-17
	90	2.2778e-16
	91	6.09014e-16
	92	1.60146e-15
	93	4.1422e-15
	94	1.05394e-14
	95	2.63826e-14
	96	6.49797e-14
	97	1.57486e-13
	98	3.7562e-13
	99	8.81743e-13
	100	2.03733e-12
	101	4.63386e-12
	102	1.0376e-11
	103	2.28746e-11
	104	4.96541e-11
	105	1.06138e-10
	106	2.23424e-10
	107	4.63203e-10
	108	9.4586e-10
	109	1.90252e-09
	110	3.76974e-09
	111	7.35875e-09
	112	1.41526e-08
	113	2.68188e-08
	114	5.00776e-08
	115	9.21457e-08
	116	1.67095e-07
	117	2.98632e-07
	118	5.2604e-07
	119	9.13355e-07
	120	1.56323e-06
	121	2.63751e-06
	122	4.38711e-06
	123	7.19449e-06
	124	1.16327e-05
	125	1.85459e-05
	126	2.91554e-05
	127	4.5198e-05
	128	6.90987e-05
	129	0.000104182
	130	0.00015492
	131	0.000227214
	132	0.000328697
	133	0.000469039
	134	0.000660227
	135	0.000916786
	136	0.00125589
	137	0.00169731
	138	0.00226316
	139	0.00297736
	140	0.00386479
	141	0.00495011
	142	0.00625627
	143	0.00780265
	144	0.0096031
	145	0.0116637
	146	0.013981
	147	0.0165395
	148	0.0193112
	149	0.0222541
	150	0.0253128
	151	0.0284191
	152	0.0314946
	153	0.0344531
	154	0.037205
	155	0.0396611
	156	0.0417381
	157	0.0433626
	158	0.0444759
	159	0.0450371
	160	0.0450262
	161	0.0444445
	162	0.0433151
	163	0.0416812
	164	0.0396031
	165	0.0371549
	166	0.03442
	167	0.0314862
	168	0.0284418
	169	0.0253703
	170	0.0223479
	171	0.01944
	172	0.0167
	173	0.0141677
	174	0.0118702
	175	0.00982186
	176	0.00802634
	177	0.00647792
	178	0.00516361
	179	0.00406516
	180	0.00316093
	181	0.00242757
	182	0.00184141
	183	0.00137963
	184	0.00102096
	185	0.000746266
	186	0.000538797
	187	0.000384244
	188	0.000270672
	189	0.000188338
	190	0.000129448
	191	8.78864e-05
	192	5.89411e-05
	193	3.90471e-05
	194	2.55527e-05
	195	1.65184e-05
	196	1.05483e-05
	197	6.65399e-06
	198	4.14641e-06
	199	2.55244e-06
	200	1.55215e-06
	201	9.32412e-07
	202	5.53326e-07
	203	3.2438e-07
	204	1.87858e-07
	205	1.07475e-07
	206	6.07426e-08
	207	3.39143e-08
	208	1.8706e-08
	209	1.01926e-08
	210	5.48653e-09
	211	2.91756e-09
	212	1.53267e-09
	213	7.95406e-10
	214	4.07791e-10
	215	2.06535e-10
	216	1.03338e-10
	217	5.10778e-11
	218	2.49409e-11
	219	1.20309e-11
	220	5.73306e-12
	221	2.69886e-12
	222	1.25509e-12
	223	5.76596e-13
	224	2.61677e-13
	225	1.17316e-13
	226	5.19569e-14
	227	2.27311e-14
	228	9.82402e-15
	229	4.19415e-15
	230	1.76882e-15
	231	7.36893e-16
	232	3.03252e-16
	233	1.23276e-16
	234	4.9502e-17
	235	1.96352e-17
	236	7.69331e-18
	237	2.97749e-18
	238	1.13827e-18
	239	4.29822e-19
	240	1.60317e-19
	241	5.90627e-20
	242	2.14924e-20
	243	7.72481e-21
	244	2.74232e-21
	245	9.61547e-22
	246	3.32996e-22
	247	1.13898e-22
	248	3.84769e-23
	249	1.28375e-23
	250	4.23013e-24
	251	1.37661e-24
	252	4.42435e-25
	253	1.40429e-25
	254	4.40181e-26
	255	1.36258e-26
	256	4.16528e-27
	257	1.25738e-27
	258	3.74822e-28
	259	1.10334e-28
	260	3.2071e-29
	261	9.20502e-30	9.20502e-30
	262	2.60879e-30	2.60879e-30
	263	7.30036e-31	7.30036e-31
	264	2.01713e-31	2.01713e-31
	265	5.50297e-32	5.50297e-32
	266	1.48226e-32	1.48226e-32
	267	3.94192e-33	3.94192e-33
	268	1.03499e-33	1.03499e-33
	269	2.68286e-34	2.68286e-34
	270	6.8657e-35	6.8657e-35
	271	1.73454e-35	1.73454e-35
	272	4.32603e-36	4.32603e-36
	273	1.06509e-36	1.06509e-36
	274	2.58859e-37	2.58859e-37
	275	6.21026e-38	6.21026e-38
	276	1.47067e-38	1.47067e-38
	277	3.43767e-39	3.43767e-39
	278	7.93138e-40	7.93138e-40
	279	1.80615e-40	1.80615e-40
	280	4.05946e-41	4.05946e-41
	281	9.00487e-42	9.00487e-42
	282	1.97138e-42	1.97138e-42
	283	4.25923e-43	4.25923e-43
	284	9.08129e-44	9.08129e-44
	285	1.91076e-44	1.91076e-44
	286	3.96726e-45	3.96726e-45
	287	8.1281e-46	8.1281e-46
	288	1.64318e-46	1.64318e-46
	289	3.27767e-47	3.27767e-47
	290	6.45077e-48	6.45077e-48
	291	1.2526e-48	1.2526e-48
	292	2.39964e-49	2.39964e-49
	293	4.53526e-50	4.53526e-50
	294	8.45592e-51	8.45592e-51
	295	1.55527e-51	1.55527e-51
	296	2.82177e-52	2.82177e-52
	297	5.04998e-53	5.04998e-53
	298	8.91439e-54	8.91439e-54
	299	1.55207e-54	1.55207e-54
	300	2.66518e-55	2.66518e-55
	301	4.51359e-56	4.51359e-56
	302	7.53839e-57	7.53839e-57
	303	1.24158e-57	1.24158e-57
	304	2.01648e-58	2.01648e-58
	305	3.22933e-59	3.22933e-59
	306	5.09932e-60	5.09932e-60
	307	7.9391e-61	7.9391e-61
	308	1.21862e-61	1.21862e-61
	309	1.84409e-62	1.84409e-62
	310	2.751e-63	2.751e-63
	311	4.0455e-64	4.0455e-64
	312	5.86411e-65	5.86411e-65
	313	8.37834e-66	8.37834e-66
	314	1.17982e-66	1.17982e-66
	315	1.63739e-67	1.63739e-67
	316	2.23946e-68	2.23946e-68
	317	3.01829e-69	3.01829e-69
	318	4.00851e-70	4.00851e-70
	319	5.24543e-71	5.24543e-71
	320	6.76286e-72	6.76286e-72
	321	8.5902e-73	8.5902e-73
	322	1.07491e-73	1.07491e-73
	323	1.32498e-74	1.32498e-74
	324	1.60874e-75	1.60874e-75
	325	1.92386e-76	1.92386e-76
	326	2.2659e-77	2.2659e-77
	327	2.62821e-78	2.62821e-78
	328	3.00191e-79	3.00191e-79
	329	3.37618e-80	3.37618e-80
	330	3.7386e-81	3.7386e-81
	331	4.07584e-82	4.07584e-82
	332	4.37438e-83	4.37438e-83
	333	4.62138e-84	4.62138e-84
	334	4.80562e-85	4.80562e-85
	335	4.9183e-86	4.9183e-86
	336	4.95372e-87	4.95372e-87
	337	4.90978e-88	4.90978e-88
	338	4.78817e-89	4.78817e-89
	339	4.59427e-90	4.59427e-90
	340	4.33673e-91	4.33673e-91
	341	4.02689e-92	4.02689e-92
	342	3.67786e-93	3.67786e-93
	343	3.30369e-94	3.30369e-94
	344	2.91837e-95	2.91837e-95
	345	2.53497e-96	2.53497e-96
	346	2.16498e-97	2.16498e-97
	347	1.81776e-98	1.81776e-98
	348	1.5003e-99	1.5003e-99
	349	1.21711e-100	1.21711e-100
	350	9.7038e-102	9.7038e-102
	351	7.60269e-103	7.60269e-103
	352	5.85269e-104	5.85269e-104
	353	4.42643e-105	4.42643e-105
	354	3.2886e-106	3.2886e-106
	355	2.39978e-107	2.39978e-107
	356	1.71982e-108	1.71982e-108
	357	1.21028e-109	1.21028e-109
	358	8.36227e-111	8.36227e-111
	359	5.67202e-112	5.67202e-112
	360	3.77631e-113	3.77631e-113
	361	2.46746e-114	2.46746e-114
	362	1.58206e-115	1.58206e-115
	363	9.95218e-117	9.95218e-117
	364	6.14147e-118	6.14147e-118
	365	3.71719e-119	3.71719e-119
	366	2.20636e-120	2.20636e-120
	367	1.28406e-121	1.28406e-121
	368	7.32596e-123	7.32596e-123
	369	4.09677e-124	4.09677e-124
	370	2.2451e-125	2.2451e-125
	371	1.2055e-126	1.2055e-126
	372	6.34097e-128	6.34097e-128
	373	3.26673e-129	3.26673e-129
	374	1.64799e-130	1.64799e-130
	375	8.13934e-132	8.13934e-132
	376	3.93481e-133	3.93481e-133
	377	1.86151e-134	1.86151e-134
	378	8.61616e-136	8.61616e-136
	379	3.90094e-137	3.90094e-137
	380	1.72713e-138	1.72713e-138
	381	7.47616e-140	7.47616e-140
	382	3.16311e-141	3.16311e-141
	383	1.30774e-142	1.30774e-142
	384	5.28173e-144	5.28173e-144
	385	2.08335e-145	2.08335e-145
	386	8.02322e-147	8.02322e-147
	387	3.01584e-148	3.01584e-148
	388	1.10612e-149	1.10612e-149
	389	3.95724e-151	3.95724e-151
	390	1.38049e-152	1.38049e-152
	391	4.69431e-154	4.69431e-154
	392	1.55544e-155	1.55544e-155
	393	5.02013e-157	5.02013e-157
	394	1.57757e-158	1.57757e-158
	395	4.82497e-160	4.82497e-160
	396	1.43566e-161	1.43566e-161
	397	4.15406e-163	4.15406e-163
	398	1.1683e-164	1.1683e-164
	399	3.1922e-166	3.1922e-166
	400	8.4696e-168	8.4696e-168
	401	2.18095e-169	2.18095e-169
	402	5.44757e-171	5.44757e-171
	403	1.31912e-172	1.31912e-172
	404	3.09477e-174	3.09477e-174
	405	7.03008e-176	7.03008e-176
	406	1.54523e-177	1.54523e-177
	407	3.28416e-179	3.28416e-179
	408	6.74421e-181	6.74421e-181
	409	1.33714e-182	1.33714e-182
	410	2.55743e-184	2.55743e-184
	411	4.71446e-186	4.71446e-186
	412	8.36874e-188	8.36874e-188
	413	1.4291e-189	1.4291e-189
	414	2.3452e-191	2.3452e-191
	415	3.69428e-193	3.69428e-193
	416	5.57943e-195	5.57943e-195
	417	8.06871e-197	8.06871e-197
	418	1.11576e-198	1.11576e-198
	419	1.47315e-200	1.47315e-200
	420	1.85409e-202	1.85409e-202
	421	2.22058e-204	2.22058e-204
	422	2.52595e-206	2.52595e-206
	423	2.72338e-208	2.72338e-208
	424	2.77666e-210	2.77666e-210
	425	2.67043e-212	2.67043e-212
	426	2.41586e-214	2.41586e-214
	427	2.04951e-216	2.04951e-216
	428	1.62483e-218	1.62483e-218
	429	1.19905e-220	1.19905e-220
	430	8.19979e-223	8.19979e-223
	431	5.16984e-225	5.16984e-225
	432	2.98731e-227	2.98731e-227
	433	1.57101e-229	1.57101e-229
	434	7.45706e-232	7.45706e-232
	435	3.16282e-234	3.16282e-234
	436	1.18386e-236	1.18386e-236
	437	3.84949e-239	3.84949e-239
	438	1.06518e-241	1.06518e-241
	439	2.43846e-244	2.43846e-244
	440	4.43356e-247	4.43356e-247
	441	6.00205e-250	6.00205e-250
	442	5.37772e-253	5.37772e-253
	443	2.39169e-256	2.39169e-256
	444
	445
	446
	447
	448
	449
	450
	451
	452
	453
	454
	455
	456
	457
	458
	459
	460
	461
	462
	463
	464
	465
	466
	467
	468
	469
	470
	471
	472
	473
	474
	475
	476
	477
	478
	479
	480
	481
	482
	483
	484
	485
	486
	487
	488
	489
	490
	491
	492
	493
	494
	495
	496
	497
	498
	499
	500
