# Supplementary material for: The wtf meiotic driver gene family has unexpectedly persisted for over 100 million years
Source: eLife. 2022 Oct 13;11:e81149. doi: 10.7554/eLife.81149 (PMC9562144; doi:10.7554/eLife.81149)
Supplement: Supplementary file 1. — (a) Percent amino acid identity of all 1:1 orthologs in Schizosaccharomyces. Orthologous gene sets between pairs of Schizosaccharomyces species were identified using a combination of Orthovenn2 and BLASTp (Xu et al., 2019). All proteins from a given species were aligned the proteins of the other species, and the best hit for each was used to determine the amino acid identity. All the percent identity values between a pair of species were then used to calculate the average amino acid identity between the two species. The genome used for finding proteins sequences was generated by Rhind et al., 2011 for Schizosaccharomyces octosporus, S. cryophilus, S. pombe, and S. japonicus. The S. osmophilus genome was sequenced and annotated in this study (see Materials and methods). The orthologs list can be found in Figure 1—source data 3. (b) Location and features of S. octosporus wtf genes. S. octosporus wtf genes names are found in column A. The gene locations are described from columns B to F. If the gene is associated with a wag gene, the wag gene name and orientation are indicated in columns G and H. Column K indicates whether the wtf gene is associated with a 5S rDNA gene (immediately adjacent to the wtf or outside a flanking wag gene). The strand location of 5S rDNA genes that may be found upstream of the wtf gene is described in column I, while the strand location for 5S rDNA genes that may be downstream of the wtf gene is described in column J. wtf genes and the associated 5S rDNA are considered to be in tandem when they are encoded in the same strand and in the same direction. The wtf and wag genes are all in a divergent orientation in that they are on opposite strands and transcribed in opposite directions. Column L details if there is a 5S rDNA upstream, downstream or if there is a 5S rDNA gene both upstream and downstream the wtf gene. Column M describes our prediction if the wtf gene encodes a driver (intact poison start codon), an antidote-only gene (no start cod [file elife-81149-supp1.xlsx]

## Sheet: Table of contents
Table	Description
1a	Percent amino acid identity of all 1:1 orthologs in Schizosaccharomyces
1b	Location and features of S. octosporus wtf genes
1c	Location and features of S. osmophilus wtf genes
1d	Location and features of S. cryophilus wtf genes
1e	Pairwise amino acid identity of intact wtf genes
1f	Genes used for FLEX motif calling
1g	Summary statistics of genome-wide FLEX motif scanning
1h	Confident hits of FLEX motif scanning
1i	Locations of LTR sequences in S. osmophilus
1j	Summary of association between 5S rDNA and wtf genes within Schizosaccharomyces genomes
1k	Location of S. octosporus wag genes
1l	Synteny analysis of the regions containing wtf genes in S. pombe (i.e. Figure 4 and Figure 4-figure supplement 1)
1m	S. cryophilus wtf genes in synteny with S. octosporus, S. osmophilus, and S. pombe wtf genes (Figure 4-supplement figure 1)
1n	Percent identity amino acid of genes flanking wtf genes at syntenic loci (i.e. Figure 4 and Figure 4-figure supplement 1)
1o	Species-specific wtf genes
1p	Analyzing if 5S rDNA genes are found at loci syntenic to 5S rDNA-adjacent S. osmophilus wtf genes in other species (i.e. Figure 6)
1q	Analyzing if 5S rDNA genes are found at loci syntenic to 5S rDNA-adjacent S. ocotoporus wtf genes in other species (i.e. Figure 6)
1r	Repeat count within exon 4 in S. octosporus and S. osmophilus wtf genes (i.e. Figure 5-supplement figure 3)
1s	Expanded analysis of wtf+5S rDNA loci in species A with 5S rDNA at the locus in species B (i.e. Figure 6)

## Sheet: 1a
	Percent amino acid identity of all 1:1 orthologs in Schizosaccharomyces
	S. cryophilus	S. pombe	S. osmophilus	S. japonicus
S. octosporus	83.6	65.3	88.9	56.6
S. cryophilus		65.6	85.2	56.7
S. pombe			65.2	57.3
S. osmophilus				56.5

## Sheet: 1b
	Location and features of S. octosporus wtf genes
S. octosporus wtf name	Chromosome	Start position of wtf gene	End position of wtf gene	Length of wtf gene	Strand location of wtf gene	wtf associated gene (wag) name	wag gene strand	5S rDNA upstream of wtf or wag-wtf unit strand	5S rDNA downstream strand	Presence of 5S rDNA with wtf gene	5S rDNA gene found upsream (U), downstream(D), or both (B) relative to the wtf gene	Predicted Function of wtf gene	Long transcript ONT-reads count	Short transcript ONT-reads count	FLEX motif FIMO hit in intron 1	FIMO hit coordinates	FIMO hit strand	P value of the FIMO hit	FIMO hit sequence
wtf1	oct_chrI	4369922	4371040	1119	reverse				reverse	YES	D	DRIVER	174	0	YES	oct_chrI:4370891-4370901	-	1.12e-06	ATAAACAAACA
wtf10	oct_chrI	3348346	3349020	675	forward			forward	forward	YES	B	PSEUDOGENE			NO
wtf11	oct_chrI	3311464	3312153	690	forward			forward	forward	YES	B	PSEUDOGENE			NO
wtf12	oct_chrI	3030019	3031104	1086	reverse				reverse	YES	D	DRIVER	34	0	YES	oct_chrI:3030898-3030908	+	2.2e-05	GTAAACAAACT
wtf13	oct_chrI	2965070	2966140	1071	reverse			reverse	reverse	YES	B	PSEUDOGENE			NO
wtf14	oct_chrI	2830111	2831190	1080	reverse			reverse	reverse	YES	B	DRIVER	199	1	YES	oct_chrI:2830983-2830993	+	2.2e-05	GTAAACAAACT
wtf15	oct_chrI	2030386	2031456	1071	forward			forward	forward	YES	B	PSEUDOGENE			NO
wtf16	oct_chrI	1791084	1792085	1002	reverse	wag3	forward	reverse	reverse	YES		DRIVER	197	2	NO
wtf17	oct_chrI	1788253	1789411	1159	reverse			reverse	reverse	YES	B	DRIVER	39	0	YES	oct_chrI:1789198-1789208	-	3.7e-07	GTAAACAAACA
wtf18	oct_chrI	1304545	1305276	732	forward					NO		PSEUDOGENE			NO
wtf19	oct_chrI	1273465	1274471	1007	reverse	wag4	forward	reverse	reverse	YES		DRIVER	82	1	NO
wtf2	oct_chrI	4362521	4363556	1036	forward			forward		YES	U	PSEUDOGENE			NO
wtf20	oct_chrI	1270673	1271789	1117	reverse			reverse	reverse	YES	B	DRIVER	86	4	YES	oct_chrI:1271576-1271586	-	3.7e-07	GTAAACAAACA
wtf21	oct_chrI	1265604	1266686	1083	reverse				reverse	YES	D	DRIVER	140	9	YES	oct_chrI:1266478-1266488	-	1.12e-06	ATAAACAAACA
wtf22	oct_chrI	1078891	1080020	1130	reverse			reverse	reverse	YES	B	DRIVER	102	7	YES	oct_chrI:1079812-1079822	-	1.12e-06	ATAAACAAACA
wtf23	oct_chrI	879129	880158	1030	forward				forward	YES	D	DRIVER	891	8	YES	oct_chrI:879318-879328	-	1.8e-06	GTAAACAAACC
wtf24	oct_chrI	416265	417346	1105	forward	wag5	reverse	forward		YES		PSEUDOGENE			NO
wtf25	oct_chrI	406349	407469	1121	forward					NO		DRIVER	624	33	YES	oct_chrI:406550-406560	+	3.7e-07	GTAAACAAACA
wtf26	oct_chrI	40940	42040	1101	forward				forward	YES	D	DRIVER	221	3	YES	oct_chrI:41079-41089	+	1.12e-06	ATAAACAAACA
wtf27	oct_chrI	35814	36833	1017	forward	wag7	reverse	forward		YES		DRIVER	12	0	NO
wtf28	oct_chrII	3686504	3687455	1035	reverse					NO		PSEUDOGENE			NO
wtf29	oct_chrII	3615349	3616388	1040	reverse	wag8	forward	reverse	reverse	YES		DRIVER	246	1	NO
wtf3	oct_chrI	4356692	4357809	1118	reverse					NO		PSEUDOGENE			NO
wtf30	oct_chrII	3608400	3609518	1119	reverse			reverse	reverse	YES	B	DRIVER	317	9	YES	oct_chrII:3609369-3609379	-	1.12e-06	ATAAACAAACA
wtf31	oct_chrII	3284985	3286029	642	reverse					NO		PSEUDOGENE			NO
wtf32	oct_chrII	3121432	3122605	1174	reverse			reverse	reverse	YES	B	DRIVER	271	10	YES	oct_chrII:3122394-3122404	-	3.7e-07	GTAAACAAACA
wtf33	oct_chrII	2964295	2965487	1193	reverse				reverse	YES	D	DRIVER	361	22	YES	oct_chrII:2965275-2965285	-	3.7e-07	GTAAACAAACA
wtf34	oct_chrII	2896740	2897832	1093	reverse			reverse	reverse	YES	B	PSEUDOGENE			NO
wtf35	oct_chrII	2633395	2634093	699	reverse			reverse	reverse	YES	B	PSEUDOGENE			NO
wtf36	oct_chrII	2630918	2631592	675	reverse			reverse	reverse	YES	B	PSEUDOGENE			NO
wtf37	oct_chrII	2599444	2600115	672	forward			forward	forward	YES	B	PSEUDOGENE			NO
wtf38	oct_chrII	2596898	2597611	714	forward			forward	forward	YES	B	PSEUDOGENE			NO
wtf39	oct_chrII	2594315	2595025	711	forward			forward	forward	YES	B	PSEUDOGENE			NO
wtf4	oct_chrI	4167878	4168928	1052	reverse	wag1	forward		reverse	YES		PSEUDOGENE			NO
wtf40	oct_chrII	2591725	2592436	712	forward			forward	forward	YES	B	PSEUDOGENE			NO
wtf41	oct_chrII	2589215	2589892	678	forward			forward	forward	YES	B	PSEUDOGENE			NO
wtf42	oct_chrII	2586654	2587373	720	forward			forward	forward	YES	B	PSEUDOGENE			NO
wtf43	oct_chrII	2584071	2584781	316	forward			forward	forward	YES	B	PSEUDOGENE			NO
wtf44	oct_chrII	2581524	2582228	705	forward			forward	forward	YES	B	PSEUDOGENE			NO
wtf45	oct_chrII	2578938	2579669	732	forward			forward	forward	YES	B	PSEUDOGENE			NO
wtf46	oct_chrII	2401286	2402391	1106	reverse			reverse	reverse	YES	B	DRIVER	263	10	YES	oct_chrII:2402179-2402189	-	3.7e-07	GTAAACAAACA
wtf47	oct_chrII	2250115	2251032	937	reverse			reverse	reverse	YES	B	PSEUDOGENE			NO
wtf48	oct_chrII	1997820	1998873	1054	forward			forward	forward	YES	B	DRIVER	18	0	YES	oct_chrII:1998011-1998021	-	2.2e-05	GTAAACAAACT
wtf49	oct_chrII	1957896	1958990	1095	reverse			reverse	reverse	YES	B	DRIVER	68	0	YES	oct_chrII:1958789-1958799	+	2.2e-05	GTAAACAAACT
wtf5	oct_chrI	4165079	4166166	1088	reverse			reverse	reverse	YES	B	DRIVER	164	1	NO
wtf50	oct_chrII	1569705	1570814	1110	forward				forward	YES	D	PSEUDOGENE			NO
wtf51	oct_chrII	843539	844128	590	reverse					NO		PSEUDOGENE			NO
wtf52	oct_chrII	673229	674281	1053	reverse				reverse	YES	D	DRIVER	249	1	YES	oct_chrII:674082-674092	+	1.8e-06	GTAAACAAACC
wtf53	oct_chrII	395742	396792	1051	forward	wag9	reverse	forward	forward	YES		DRIVER	409	0	NO
wtf54	oct_chrII	97615	98634	1020	reverse	wag11	forward	reverse		YES		DRIVER	14	0	NO
wtf55	oct_chrII	94943	95934	992	reverse					NO		PSEUDOGENE			NO
wtf56	oct_chrII	25549	26621	1073	reverse	wag12	forward	reverse	reverse	YES		DRIVER	477	3	YES	oct_chrII:26424-26434	-	1.09e-05	ATAAACAAAGG
wtf57	oct_chrII	15549	16680	1132	forward	wag13	reverse	forward	forward	YES		DRIVER	224	0	YES	oct_chrII:15736-15746	+	1.09e-05	ATAAACAAAGG
wtf58	oct_chrIII	2953839	2954947	1109	forward			forward		YES	U	DRIVER	41	0	NO
wtf59	oct_chrIII	2895124	2896225	1102	forward			forward	forward	YES	B	DRIVER	127	0	NO
wtf6	oct_chrI	4160890	4162035	1146	reverse	wag2	forward		reverse	YES		DRIVER	99	6	YES	oct_chrI:4161823-4161833	-	3.7e-07	GTAAACAAACA
wtf60	oct_chrIII	2859004	2860099	1096	reverse					NO		DRIVER	393	14	YES	oct_chrIII:2859892-2859902	-	5.7e-06	ATAAACAAATA
wtf61	oct_chrIII	2027609	2028702	1094	forward	wag14	reverse		forward	YES		DRIVER	18	0	YES	oct_chrIII:2027806-2027816	-	2.2e-05	GTAAACAAACT
wtf62	oct_chrIII	1952704	1953791	1088	reverse			reverse	reverse	YES	B	DRIVER	192	1	NO
wtf63	oct_chrIII	1833319	1834008	690	forward			forward	forward	YES	B	PSEUDOGENE			NO
wtf64	oct_chrIII	1830853	1831529	677	forward			forward	forward	YES	B	PSEUDOGENE			NO
wtf65	oct_chrIII	1811102	1811907	806	reverse			reverse	reverse	YES	B	PSEUDOGENE			NO
wtf66	oct_chrIII	1622045	1623175	1131	forward				forward	YES	D	DRIVER	23	1	YES	oct_chrIII:1622247-1622257	+	3.7e-07	GTAAACAAACA
wtf67	oct_chrIII	1600762	1601915	1154	reverse				reverse	YES	D	DRIVER	244	13	YES	oct_chrIII:1601703-1601713	-	3.7e-07	GTAAACAAACA
wtf68	oct_chrIII	1561441	1562665	1225	reverse				reverse	YES	D	DRIVER	281	29	YES	oct_chrIII:1562453-1562463	-	3.7e-07	GTAAACAAACA
wtf69	oct_chrIII	1110997	1112029	1033	reverse	wag15	forward	reverse	reverse	YES		PSEUDOGENE			NO
wtf7	oct_chrI	3754653	3755761	1109	reverse			reverse	reverse	YES	B	DRIVER	84	2	NO
wtf70	oct_chrIII	1108246	1109321	1076	reverse			reverse	reverse	YES	B	DRIVER	240	1	YES	oct_chrIII:1109118-1109128	-	5.7e-06	ATAAACAAATA
wtf71	oct_chrIII	1005864	1006985	1122	reverse				reverse	YES	D	DRIVER	357	1	NO
wtf72	oct_chrIII	773392	774456	1065	forward			forward	forward	YES	B	DRIVER	56	0	NO
wtf73	oct_chrIII	764985	766042	1058	forward				forward	YES	D	DRIVER	37	0	NO
wtf74	oct_chrIII	641354	642400	1047	forward				forward	YES	D	DRIVER	440	0	NO
wtf75	oct_chrIII	424476	425754	981	forward					NO		PSEUDOGENE			NO
wtf76	oct_chrIII	192059	193093	1035	reverse					NO		PSEUDOGENE			NO
wtf77	oct_chrIII	158507	159526	1020	reverse	wag17	forward	reverse	reverse	YES		DRIVER	426	1	NO
wtf78	oct_chrIII	153054	154185	1132	reverse				reverse	YES	D	DRIVER	303	6	YES	oct_chrIII:154036-154046	-	1.12e-06	ATAAACAAACA
wtf79	oct_chrIII	101261	102385	1125	reverse	wag18	forward	reverse	reverse	YES		DRIVER	361	4	YES	oct_chrIII:102181-102191	-	1.09e-05	ATAAACAAAGG
wtf8	oct_chrI	3457072	3458301	1230	reverse			reverse	reverse	YES	B	DRIVER	311	17	YES	oct_chrI:3458089-3458099	-	3.7e-07	GTAAACAAACA
wtf80	oct_chrIII	70280	71057	778	forward					NO		PSEUDOGENE			NO
wtf81	oct_chrIII	25854	26945	1092	reverse	wag20	forward	reverse	reverse	YES		DRIVER	320	0	NO
wtf82	oct_chrIII	15876	17018	1144	forward				forward	YES	D	DRIVER	107	0	YES	oct_chrIII:16015-16025	+	1.12e-06	ATAAACAAACA
wtf83	oct_chrIII	10735	11754	1020	forward	wag21	reverse	forward		YES		DRIVER	223	2	NO
wtf9	oct_chrI	3365324	3365998	675	reverse			reverse	reverse	YES	B	PSEUDOGENE			NO

## Sheet: 1c
	Location and features of S. osmophilus wtf genes
S. osmophilus wtf name	Contig	Start position of wtf gene	End position of wtf gene	Length of wtf gene	Strand location of wtf gene	wtf associated gene (wag) name	wag gene strand	5S rDNA upstream of wtf or wag-wtf unit strand	5S rDNA downstream strand	Presence of 5S rDNA with wtf gene	5S rDNA gene found upsream (U), downstream(D), or both (B) relative to the wtf gene	Predicted Function of wtf gene	LTR direction	LTR and wtf orientation	FLEX motif FIMO hit in intron 1	FIMO hit coordinates	FIMO hit strand	P value of the FIMO hit	FIMO hit sequence
wtf1	tig00000002_pilon_x4	155784	156968	1185	reverse	wag1	forward	reverse	reverse	YES	B	DRIVER			NO
wtf2	tig00000002_pilon_x4	234134	235275	1142	reverse			reverse		YES	U	DRIVER			NO
wtf3	tig00000002_pilon_x4	261608	262741	1134	reverse	wag2	forward	reverse	reverse	YES	B	DRIVER			NO
wtf4	tig00000002_pilon_x4	738683	739228	546	reverse				reverse	YES	D	PSEUDOGENE			NO
wtf5	tig00000002_pilon_x4	1756570	1757635	1066	reverse	wag4	forward	reverse	reverse	YES	B	DRIVER			NO
wtf6	tig00000002_pilon_x4	1950086	1951137	1052	reverse					NO		PSEUDOGENE			NO
wtf7	tig00000002_pilon_x4	1958508	1959591	1084	reverse	wag5	forward	reverse		YES	U	PSEUDOGENE			NO
wtf8	tig00000008_pilon_x4	195667	196757	1091	forward			forward	forward	YES	U	DRIVER			YES	tig00000008_pilon_x4:195857-195867	+	1.23e-05	ACAAACAAACA
wtf9	tig00000008_pilon_x4	1056513	1057555	1043	forward	wag6	reverse	forward	forward	YES	B	DRIVER			YES	tig00000008_pilon_x4:1056754-1056764	-	2.48e-05	GTCAACAAACA
wtf10	tig00000008_pilon_x4	1138258	1139275	1018	forward				forward	YES	D	DRIVER			YES	tig00000008_pilon_x4:1138499-1138509	-	2.48e-05	GTCAACAAACA
wtf11	tig00000011_pilon_x4	128651	129009	359	forward					NO		PSEUDOGENE			NO
wtf12	tig00000011_pilon_x4	226226	227324	1099	forward	wag7	reverse	forward	forward	YES	B	DRIVER			YES	tig00000011_pilon_x4:226466-226476	-	2.48e-05	GTCAACAAACA
wtf13	tig00000011_pilon_x4	373097	373400	304	forward					NO		PSEUDOGENE			NO
wtf14	tig00000011_pilon_x4	610636	611706	1071	reverse			reverse	reverse	YES	B	DRIVER			YES	tig00000011_pilon_x4:611505-611515	-	1.23e-05	ACAAACAAACA
wtf15	tig00000014_pilon_x4	455751	456290	540	reverse					NO		PSEUDOGENE			NO
wtf16	tig00000014_pilon_x4	780665	781861	1197	reverse	wag8	forward	reverse	reverse	YES	B	ANTIDOTE			YES	tig00000014_pilon_x4:781605-781615	+	2.48e-05	GTCAACAAACA
wtf17	tig00000014_pilon_x4	858051	858801	751	reverse					NO		PSEUDOGENE			NO
wtf18	tig00000019_pilon_x4	12275	13387	1113	forward	wag9	reverse		forward	YES	D	DRIVER			YES	tig00000019_pilon_x4:12516-12526	-	2.48e-05	GTCAACAAACA
wtf19	tig00000019_pilon_x4	28059	29209	1151	forward	wag10	reverse	forward	forward	YES	B	DRIVER	forward	tandem	NO
wtf20	tig00000019_pilon_x4	411445	412574	1130	forward	wag11	reverse	forward	forward	YES	B	DRIVER			YES	tig00000019_pilon_x4:411686-411696	-	2.48e-05	GTCAACAAACA
wtf21	tig00007780_pilon_x4	108116	109186	1071	reverse			reverse	reverse	YES	B	DRIVER			YES	tig00007780_pilon_x4:108902-108912	+	2.54e-05	ACAAACAAAGA
wtf22	tig00007780_pilon_x4	345565	346673	1109	forward	wag12	reverse	forward	forward	YES	B	DRIVER			YES	tig00007780_pilon_x4:345766-345776	+	1.23e-05	ACAAACAAACA
wtf23	tig00007780_pilon_x4	1156091	1157207	1117	reverse	wag13	forward	reverse	reverse	YES	B	DRIVER			YES	tig00007780_pilon_x4:1156956-1156966	+	2.48e-05	GTCAACAAACA
wtf24	tig00007780_pilon_x4	1357330	1358490	1161	reverse	wag14	forward	reverse	reverse	YES	B	DRIVER			YES	tig00007780_pilon_x4:1358228-1358238	+	2.48e-05	GTCAACAAACA
wtf25	tig00007780_pilon_x4	1650468	1651653	1186	reverse			reverse	reverse	YES	B	DRIVER			YES	tig00007780_pilon_x4:1651374-1651384	+	2.54e-05	ACAAACAAAGA
wtf26	tig00007781_pilon_x4	8561	8833	273	reverse					NO		PSEUDOGENE			NO
wtf27	tig00007782_pilon_x4 (reversed)	821943	822236	294	forward					NO		PSEUDOGENE			NO
wtf28	tig00007782_pilon_x4 (reversed)	747734	748857	1124	forward	wag15	reverse	forward	forward	YES	B	DRIVER			YES	tig00007782_pilon_x4_reversed:747976-747986	-	2.48e-05	GTCAACAAACA
wtf29	tig00007782_pilon_x4 (reversed)	622192	623328	1137	forward	wag16	reverse	forward	forward	YES	B	DRIVER			NO
wtf30	tig00007782_pilon_x4 (reversed)	159418	160604	1187	reverse			reverse	reverse	YES	B	DRIVER			YES	tig00007782_pilon_x4_reversed:160353-160363	+	2.48e-05	GTCAACAAACA
wtf31	tig00007782_pilon_x4 (reversed)	5757	6885	1129	forward	wag18	reverse	forward	forward	YES	B	DRIVER			YES	tig00007782_pilon_x4_reversed:5998-6008	-	2.48e-05	GTCAACAAACA
wtf32	tig00007788_pilon_x4 (reversed)	1203530	1204690	1161	reverse			reverse	reverse	YES	B	DRIVER			YES	tig00007788_pilon_x4_reversed:1204424-1204434	+	2.54e-05	ACAAACAAAGA
wtf33	tig00007788_pilon_x4 (reversed)	1067277	1068429	1153	forward			forward		YES	U	DRIVER			YES	tig00007788_pilon_x4_reversed:1067517-1067527	-	2.48e-05	GTCAACAAACA
wtf34	tig00007788_pilon_x4 (reversed)	1435231	1435563	333	reverse					NO		PSEUDOGENE			NO
wtf35	tig00007788_pilon_x4 (reversed)	1439252	1440338	125	forward	wag19	forward		reverse	YES	D	DRIVER			YES	tig00007788_pilon_x4_reversed:864139-864149	+	2.48e-05	GTCAACAAACA
wtf36	tig00007788_pilon_x4 (reversed)	772098	773031	934	forward					NO		PSEUDOGENE	reverse	convergent	NO
wtf37	tig00007788_pilon_x4 (reversed)	684689	685782	1094	reverse	wag20	forward	reverse	reverse	YES	B	DRIVER	reverse	tandem	YES	tig00007788_pilon_x4_reversed:685532-685542	+	2.48e-05	GTCAACAAACA
wtf38	tig00007788_pilon_x4 (reversed)	401161	402341	1181	forward				forward	YES	D	DRIVER	forward for upstream reverse for downstream	upstream divergent, downstream tandem	YES	tig00007788_pilon_x4_reversed:401401-401411	-	2.48e-05	GTCAACAAACA
wtf39	tig00007788_pilon_x4 (reversed)	394072	395207	1136	forward			forward	forward	YES	B	DRIVER			YES	tig00007788_pilon_x4_reversed:394281-394291	+	2.13e-05	CAAAACAAACA
wtf40	tig00007788_pilon_x4 (reversed)	48682	49816	1135	forward				forward	YES	D	DRIVER			YES	tig00007788_pilon_x4_reversed:48922-48932	-	2.48e-05	GTCAACAAACA
wtf41	tig00007788_pilon_x4 (reversed)	35853	36996	1144	forward	wag21	reverse	forward	forward	YES	B	DRIVER			YES	tig00007788_pilon_x4_reversed:36094-36104	-	2.48e-05	GTCAACAAACA
wtf42	tig00007788_pilon_x4 (reversed)	28146	29221	1076	forward	wag22	reverse	forward	forward	YES	B	DRIVER			YES	tig00007788_pilon_x4_reversed:28385-28395	-	2.48e-05	GTCAACAAACA

## Sheet: 1d
	Location and features of S. cryophilus wtf genes
S. cryophilus wtf name	Chromosome	Start position of wtf gene	End position of wtf gene	Length of wtf gene	Strand location of wtf gene	wtf associated gene (wag) name	wag gene strand	5S rDNA upstream of wtf or wag-wtf unit strand	5S rDNA downstream strand	Presence of 5S rDNA associated with wtf gene	5S rDNA gene found upsream (U), downstream (D), or both (B) relative to the wtf gene	Predicted function of wtf gene	FLEX motif FIMO hit in intron 1	FIMO hit coordinates	FIMO hit strand	P value of the FIMO hit	FIMO hit sequence
wtf1	cry_chrI	4824108	4825109	1002	reverse	wag20	forward	reverse	reverse	YES	B	DIRVER	NO
wtf2	cry_chrI	4845249	4846294	1046	reverse							ANTIDOTE	YES	cry_chrI:4846075-4846085	-	1.12e-06	ATAAACAAACA
wtf3	cry_chrII	273674	274362	689	forward							PSEUDOGENE	NO
wtf4	cry_chrIII	269197	269789	593	forward							PSEUDOGENE	NO
wtf5	cry_chrIII	2558393	2559345	953	forward	wag35	reverse	forward	forward	YES	B	PSEUDOGENE	NO

## Sheet: 1e
	Pairwise amino acid identity of intact wtf genes
	octo_wtf77	octo_wtf83	octo_wtf29	octo_wtf53	octo_wtf56	octo_wtf27	octo_wtf54	octo_wtf16	octo_wtf19	octo_wtf79	octo_wtf81	osmo_wtf42	cryo_wtf1	osmo_wtf18	osmo_wtf10	osmo_wtf9	cryo_wtf2	osmo_wtf12	osmo_wtf28	osmo_wtf23	osmo_wtf29	osmo_wtf38	osmo_wtf35	osmo_wtf37	osmo_wtf31	osmo_wtf21	octo_wtf1	octo_wtf26	octo_wtf82	octo_wtf57	octo_wtf72	octo_wtf58	octo_wtf30	octo_wtf70	octo_wtf74	octo_wtf73	octo_wtf5	octo_wtf59	octo_wtf60	osmo_wtf1	osmo_wtf33	osmo_wtf2	osmo_wtf3	osmo_wtf20	osmo_wtf19	osmo_wtf40	osmo_wtf30	osmo_wtf41	osmo_wtf16
octo_wtf77		96.694	84.739	78.261	84.739	81.569	81.569	73.14	75.62	75.385	76.316	68.11	50.199	44.718	47.012	47.471	27.925	32.234	31.071	32.374	29.225	29.667	34.211	33.086	31.317	29.851	47.97	50.379	47.482	48.201	49.254	57.092	41.912	44.358	44.444	44.697	41.971	43.015	60.153	44.251	46.57	35.018	28.102	34.799	34.52	36	35.069	36	34.828
octo_wtf83	96.694		84.337	79.051	84.739	83.529	83.529	73.554	75.207	76.923	74.06	68.898	50.996	45.423	47.809	47.86	28.302	32.967	31.786	32.734	29.577	30.333	34.586	33.829	32.028	30.597	47.97	51.136	48.201	49.64	48.507	57.801	42.279	43.58	42.912	43.561	41.606	43.75	60.536	44.948	46.931	35.379	27.372	34.799	35.231	36.727	35.764	36.727	35.862
octo_wtf29	84.739	84.337		82.213	85.141	71.756	71.756	72.289	78.715	77.692	73.684	69.291	48.837	43.643	46.124	46.591	27.206	32.5	31.359	32.281	28.522	28.99	34.432	33.333	31.25	30.182	48.201	49.446	46.667	46.316	49.091	51.557	39.785	41.667	43.657	44.28	40.214	42.652	55.597	42.177	44.014	35.563	28.114	34.643	34.375	35.816	34.237	35.461	34.343
octo_wtf53	78.261	79.051	82.213		88.538	70.301	70.301	74.308	72.332	76.154	72.18	70.543	48.473	43.729	45.42	45.896	26.812	31.338	30.241	31.142	27.797	28.617	33.213	32.5	30.822	29.749	47.518	49.818	47.059	48.097	47.67	51.877	42.049	43.657	43.382	43.273	41.754	43.463	55.147	42.617	44.792	33.681	27.018	33.099	34.247	35.664	34.114	36.014	33.887
octo_wtf56	84.739	84.739	85.141	88.538		76.718	76.718	74.699	73.896	75.769	69.925	71.26	49.612	44.33	48.062	47.348	26.838	32.143	31.01	32.281	28.522	29.316	34.432	33.333	31.597	30.182	48.921	50.185	47.368	48.421	48.727	55.363	41.577	44.318	44.03	43.542	40.925	42.294	59.701	43.878	46.127	35.563	28.47	35	35.417	36.879	34.915	36.525	35.017
octo_wtf27	81.569	83.529	71.756	70.301	76.718		100	64.314	64.314	64.103	60.932	60.606	43.846	38.908	41.538	40.449	25.843	31.022	29.893	31.183	28.07	28.904	32.836	31.636	30.851	29.889	46.52	47.778	46.071	47.5	46.84	56.383	41.758	41.825	42.966	42.264	40	42.491	59.316	43.206	45.683	33.574	25.725	33.212	34.043	35.507	34.256	35.507	34.138
octo_wtf54	81.569	83.529	71.756	70.301	76.718	100		64.314	64.314	64.103	60.932	60.606	43.846	38.908	41.538	40.449	25.843	31.022	29.893	31.183	28.07	28.904	32.836	31.636	30.851	29.889	46.52	47.778	46.071	47.5	46.84	56.383	41.758	41.825	42.966	42.264	40	42.491	59.316	43.206	45.683	33.574	25.725	33.212	34.043	35.507	34.256	35.507	34.138
octo_wtf16	73.14	73.554	72.289	74.308	74.699	64.314	64.314		81.513	76.538	71.805	71.654	50.403	45.196	46.774	47.059	26.996	30.996	29.856	30.435	27.305	27.852	32.576	31.835	30.108	30.451	54.887	55.385	52.19	51.825	56.654	46.763	45.896	46.64	48.249	48.077	43.333	46.296	50.973	45.965	48.727	33.455	25.735	32.841	34.05	34.799	33.916	35.531	35.417
octo_wtf19	75.62	75.207	78.715	72.332	73.896	64.314	64.314	81.513		82.308	75.564	70.079	49.398	44.326	48.193	47.059	28.137	32.103	30.935	32.246	28.369	28.859	34.47	32.959	30.824	30.827	53.933	56.923	53.65	53.285	54.167	47.842	43.284	46.245	47.471	48.462	43.333	45.926	52.918	46.316	49.455	33.818	27.206	33.21	34.05	34.066	34.615	35.531	34.375
octo_wtf79	75.385	76.923	77.692	76.154	75.769	64.103	64.103	76.538	82.308		88.346	70.943	46.097	41.391	44.61	43.273	26.502	30.241	29.195	30.068	27.152	27.987	31.69	30.662	29.431	27.972	50.519	54.965	52.027	53.041	51.049	46	41.379	43.273	43.011	43.617	41.096	43.793	48.387	45.246	47.458	32.203	25.342	31.615	32.776	33.447	33.333	34.13	32.792
octo_wtf81	76.316	74.06	73.684	72.18	69.925	60.932	60.932	71.805	75.564	88.346		69.742	45.091	40.909	42.545	43.06	25.952	29.966	28.947	30.132	27.273	27.778	31.724	30.375	29.18	27.397	48.475	54.514	51.656	52.318	49.658	44.444	39.527	41.637	41.754	42.361	40.268	41.892	47.018	43.73	46.512	31.561	25.168	31.313	31.803	32.441	32.372	33.11	31.529
osmo_wtf42	68.11	68.898	69.291	70.543	71.26	60.606	60.606	71.654	70.079	70.943	69.742		60.87	55.944	56.126	55	29.304	35.357	34.146	35.088	31.615	32.248	36.996	36.232	35.069	34.545	50.714	53.846	50.871	50.174	50.181	45.361	45.552	47.368	45.556	46.154	45.23	45.552	50.37	55.102	59.507	39.437	28.269	38.929	39.236	41.489	40	42.199	37.124
cryo_wtf1	50.199	50.996	48.837	48.473	49.612	43.846	43.846	50.403	49.398	46.097	45.091	60.87		84.291	89.912	85.654	51.807	62.109	60.456	61.686	56.554	56.537	64.659	63.095	61.364	61.753	32.721	32.83	30.824	30.824	30.855	30.035	32.234	33.977	32.061	32.453	31.273	31.868	34.351	33.217	34.783	37.818	25.912	37.269	36.918	38.828	36.014	37.729	34.483
osmo_wtf18	44.718	45.423	43.643	43.729	44.33	38.908	38.908	45.196	44.326	41.391	40.909	55.944	84.291		78.927	75.926	46.099	55.709	54.392	55.102	52	51.582	58.156	56.842	55.556	55.282	29.508	30.201	28.526	28.526	28.146	27.532	29.412	30.822	28.814	29.53	28.896	29.412	30.847	30.721	32.039	34.091	23.779	33.882	33.654	35.294	32.602	33.987	31.269
osmo_wtf10	47.012	47.809	46.124	45.42	48.062	41.538	41.538	46.774	48.193	44.61	42.545	56.126	89.912	78.927		85.281	48.996	60.547	58.935	59.77	56.18	54.77	63.052	61.508	59.091	60.956	30.882	32.075	30.108	30.108	29.74	29.329	30.037	32.046	29.771	30.943	29.818	31.136	32.061	32.168	34.058	36	24.453	35.424	34.409	37.363	34.266	35.897	32.414
osmo_wtf9	47.471	47.86	46.591	45.896	47.348	40.449	40.449	47.059	47.059	43.273	43.06	55	85.654	75.926	85.281		48.047	58.935	61.217	59.328	57.678	55.124	62.109	63.492	60.227	57.364	30.108	30.515	28.671	28.322	28.623	27.586	29.643	31.321	29.368	30.147	29.078	29.286	31.97	31.399	32.862	38.545	25.912	36.531	36.918	35	34.266	33.571	34.483
cryo_wtf2	27.925	28.302	27.206	26.812	26.838	25.843	25.843	26.996	28.137	26.502	25.952	29.304	51.807	46.099	48.996	48.047		62.353	61.069	63.846	62.406	59.22	66.935	65.882	63.878	56.917	35.926	38.951	38.267	38.267	37.079	35.587	32.472	33.846	32.308	34.981	38.095	38.007	34.615	40.351	40	43.066	34.432	43.704	43.885	45.956	42.456	45.221	37.153
osmo_wtf12	32.234	32.967	32.5	31.338	32.143	31.022	31.022	30.996	32.103	30.241	29.966	35.357	62.109	55.709	60.547	58.935	62.353		95.785	77.099	71.324	70.423	78.824	75.573	75.465	66.409	38.406	44.689	43.11	42.756	43.015	42.657	35.87	35.448	34.701	38.06	42.806	46.014	36.94	46.021	46.953	65.091	39.568	50.365	50	53.986	47.751	52.536	39.726
osmo_wtf28	31.071	31.786	31.359	30.241	31.01	29.893	29.893	29.856	30.935	29.195	28.947	34.146	60.456	54.392	58.935	61.217	61.069	95.785		75.465	73.162	72.183	77.099	77.863	78.439	64.286	36.749	42.857	41.379	41.034	41.219	40.956	34.982	34.545	33.818	36.364	41.053	44.523	36	44.932	45.804	67.273	41.727	52.555	52.482	52.65	49.135	51.237	42.123
osmo_wtf23	32.374	32.734	32.281	31.142	32.281	31.183	31.183	30.435	32.246	30.068	30.132	35.088	61.686	55.102	59.77	59.328	63.846	77.099	75.465		83.764	86.17	87.692	83.895	82.09	70.769	43.525	46.403	48.936	48.582	47.653	46.667	40	38.462	37.363	42.857	47.857	50.909	40.659	61.458	54.676	54.255	52.669	63.082	61.21	61.091	56.944	60.364	49.141
osmo_wtf29	29.225	29.577	28.522	27.797	28.522	28.07	28.07	27.305	28.369	27.152	27.273	31.615	56.554	52	56.18	57.678	62.406	71.324	73.162	83.764		87.943	81.203	83.083	82.772	69.925	40.559	43.706	46.207	45.862	43.86	44.71	36.042	35.125	34.767	39.146	45.486	47.35	36.201	55.743	52.098	51.056	51.773	62.857	58.865	57.951	60.702	55.83	46.075
osmo_wtf38	29.667	30.333	28.99	28.617	29.316	28.904	28.904	27.852	28.859	27.987	27.778	32.248	56.537	51.582	54.77	55.124	59.22	70.423	72.183	86.17	87.943		76.95	78.369	79.505	65.248	41.695	45.085	47.157	47.157	46.102	46.026	36.949	35.593	33.898	39.322	46.801	48.136	35.932	57.049	50.847	50.505	48.98	57.483	57.483	56.61	59.864	55.254	50.166
osmo_wtf35	34.211	34.586	34.432	33.213	34.432	32.836	32.836	32.576	34.47	31.69	31.724	36.996	64.659	58.156	63.052	62.109	66.935	78.824	77.099	87.692	81.203	76.95		92.157	85.932	77.47	43.911	47.388	46.763	46.403	46.642	43.262	40.441	40.996	39.847	43.561	46.715	48.529	42.529	54.035	57.455	54.38	51.095	62.593	64.029	63.603	60	62.132	44.637
osmo_wtf37	33.086	33.829	33.333	32.5	33.333	31.636	31.636	31.835	32.959	30.662	30.375	36.232	63.095	56.842	61.508	63.492	65.882	75.573	77.863	83.895	83.083	78.369	92.157		86.692	74.806	40.647	45.985	44.912	44.561	44.364	42.215	37.993	38.868	36.567	40.221	44.484	46.595	39.925	53.425	54.61	55.839	52.381	65.556	65.468	61.649	60.351	60.215	44.291
osmo_wtf31	31.317	32.028	31.25	30.822	31.597	30.851	30.851	30.108	30.824	29.431	29.18	35.069	61.364	55.556	59.091	60.227	63.878	75.465	78.439	82.09	82.772	79.505	85.932	86.692		75.285	40.636	44.876	46.341	46.341	43.972	44.828	37.857	37.319	35.87	39.568	45.614	47.857	37.681	52.56	56.89	56.228	49.821	60.289	64.875	69.534	61.538	68.817	47.931
osmo_wtf21	29.851	30.597	30.182	29.749	30.182	29.889	29.889	30.451	30.827	27.972	27.397	34.545	61.753	55.282	60.956	57.364	56.917	66.409	64.286	70.769	69.925	65.248	77.47	74.806	75.285		37.5	40	40.942	40.58	39.033	39.068	34.572	35.249	34.221	36.981	40.441	38.971	36.882	40	48.727	40.647	35.74	47.445	50.36	53.676	48.07	51.471	41.869
octo_wtf1	47.97	47.97	48.201	47.518	48.921	46.52	46.52	54.887	53.933	50.519	48.475	50.714	32.721	29.508	30.882	30.108	35.926	38.406	36.749	43.525	40.559	41.695	43.911	40.647	40.636	37.5		72.587	73.308	72.932	81.081	68.148	61.977	64.865	67.954	78.462	66.038	65.556	65.637	58.865	59.559	41.786	40.511	46.739	46.595	48.352	45.583	47.985	44.561
octo_wtf26	50.379	51.136	49.446	49.818	50.185	47.778	47.778	55.385	56.923	54.965	54.514	53.846	32.83	30.201	32.075	30.515	38.951	44.689	42.857	46.403	43.706	45.085	47.388	45.985	44.876	40	72.587		93.609	90.602	82.879	74.815	55.894	55.469	53.516	61.868	74.427	70.37	61.328	64.184	64.706	45.848	41.758	49.451	49.104	51.648	49.47	51.648	43.86
octo_wtf82	47.482	48.201	46.667	47.059	47.368	46.071	46.071	52.19	53.65	52.027	51.656	50.871	30.824	28.526	30.108	28.671	38.267	43.11	41.379	48.936	46.207	47.157	46.763	44.912	46.341	40.942	73.308	93.609		96.992	81.273	78.889	57.678	55.263	53.383	61.798	75.093	72.263	60.902	68.085	65.942	44.251	43.06	49.47	50.53	53.069	50.523	53.069	47.018
octo_wtf57	48.201	49.64	46.316	48.097	48.421	47.5	47.5	51.825	53.285	53.041	52.318	50.174	30.824	28.526	30.108	28.322	38.267	42.756	41.034	48.582	45.862	47.157	46.403	44.561	46.341	40.58	72.932	90.602	96.992		80.899	80	56.18	53.759	53.759	62.172	73.606	71.898	58.647	67.376	65.217	43.206	42.349	48.41	49.823	52.347	49.826	52.347	45.965
octo_wtf72	49.254	48.507	49.091	47.67	48.727	46.84	46.84	56.654	54.167	51.049	49.658	50.181	30.855	28.146	29.74	28.623	37.079	43.015	41.219	47.653	43.86	46.102	46.642	44.364	43.972	39.033	81.081	82.879	81.273	80.899		75.185	55.513	55.469	58.203	67.578	77.099	73.704	59.766	63.475	62.5	45.652	43.956	50.368	48.387	50.549	48.41	50.183	44.561
octo_wtf58	57.092	57.801	51.557	51.877	55.363	56.383	56.383	46.763	47.842	46	44.444	45.361	30.035	27.532	29.329	27.586	35.587	42.657	40.956	46.667	44.71	46.026	43.262	42.215	44.828	39.068	68.148	74.815	78.889	80	75.185		52.593	48.889	49.63	59.259	69.485	69.675	66.296	63.83	60.932	43.945	42.254	47.902	49.65	52.857	49.655	51.786	47.018
octo_wtf30	41.912	42.279	39.785	42.049	41.577	41.758	41.758	45.896	43.284	41.379	39.527	45.552	32.234	29.412	30.037	29.643	32.472	35.87	34.982	40	36.042	36.949	40.441	37.993	37.857	34.572	61.977	55.894	57.678	56.18	55.513	52.593		84.942	87.259	78.846	65.283	66.667	70.27	50.355	52.206	38.571	33.942	41.667	43.478	44.815	42.403	45.556	42.456
octo_wtf70	44.358	43.58	41.667	43.657	44.318	41.825	41.825	46.64	46.245	43.273	41.637	47.368	33.977	30.822	32.046	31.321	33.846	35.448	34.545	38.462	35.125	35.593	40.996	38.868	37.319	35.249	64.865	55.469	55.263	53.759	55.469	48.889	84.942		90.726	84.127	64.885	63.296	71.774	47.163	48.529	37.868	33.086	40.672	40.58	41.481	39.576	42.593	38.947
octo_wtf74	44.444	42.912	43.657	43.382	44.03	42.966	42.966	48.249	47.471	43.011	41.754	45.556	32.061	28.814	29.771	29.368	32.308	34.701	33.818	37.363	34.767	33.898	39.847	36.567	35.87	34.221	67.954	53.516	53.383	53.759	58.203	49.63	87.259	90.726		87.302	64.122	64.794	71.371	46.099	48.162	38.235	33.333	41.418	39.13	41.852	38.869	41.852	38.596
octo_wtf73	44.697	43.561	44.28	43.273	43.542	42.264	42.264	48.077	48.462	43.617	42.361	46.154	32.453	29.53	30.943	30.147	34.981	38.06	36.364	42.857	39.146	39.322	43.561	40.221	39.568	36.981	78.462	61.868	61.798	62.172	67.578	59.259	78.846	84.127	87.302		72.519	74.157	63.492	51.418	51.103	41.544	38.889	46.269	43.478	45.185	43.11	46.296	42.456
octo_wtf5	41.971	41.606	40.214	41.754	40.925	40	40	43.333	43.333	41.096	40.268	45.23	31.273	28.896	29.818	29.078	38.095	42.806	41.053	47.857	45.486	46.801	46.715	44.484	45.614	40.441	66.038	74.427	75.093	73.606	77.099	69.485	65.283	64.885	64.122	72.519		81.985	51.908	59.155	58.394	45.39	43.165	51.439	51.246	53.455	50.175	52.364	45.296
octo_wtf59	43.015	43.75	42.652	43.463	42.294	42.491	42.491	46.296	45.926	43.793	41.892	45.552	31.868	29.412	31.136	29.286	38.007	46.014	44.523	50.909	47.35	48.136	48.529	46.595	47.857	38.971	65.556	70.37	72.263	71.898	73.704	69.675	66.667	63.296	64.794	74.157	81.985		49.438	59.929	59.559	47.5	45.62	52.536	53.261	54.815	53.357	56.296	44.912
octo_wtf60	60.153	60.536	55.597	55.147	59.701	59.316	59.316	50.973	52.918	48.387	47.018	50.37	34.351	30.847	32.061	31.97	34.615	36.94	36	40.659	36.201	35.932	42.529	39.925	37.681	36.882	65.637	61.328	60.902	58.647	59.766	66.296	70.27	71.774	71.371	63.492	51.908	49.438		52.128	54.412	41.544	35.185	44.03	42.754	44.074	40.636	43.333	41.053
osmo_wtf1	44.251	44.948	42.177	42.617	43.878	43.206	43.206	45.965	46.316	45.246	43.73	55.102	33.217	30.721	32.168	31.399	40.351	46.021	44.932	61.458	55.743	57.049	54.035	53.425	52.56	40	58.865	64.184	68.085	67.376	63.475	63.83	50.355	47.163	46.099	51.418	59.155	59.929	52.128		79.433	51.712	52.249	60.208	60.554	59.717	57.679	60.424	52.759
osmo_wtf33	46.57	46.931	44.014	44.792	46.127	45.683	45.683	48.727	49.455	47.458	46.512	59.507	34.783	32.039	34.058	32.862	40	46.953	45.804	54.676	52.098	50.847	57.455	54.61	56.89	48.727	59.559	64.706	65.942	65.217	62.5	60.932	52.206	48.529	48.162	51.103	58.394	59.559	54.412	79.433		50.177	49.104	57.706	64.516	66.3	65.018	65.568	49.477
osmo_wtf2	35.018	35.379	35.563	33.681	35.563	33.574	33.574	33.455	33.818	32.203	31.561	39.437	37.818	34.091	36	38.545	43.066	65.091	67.273	54.255	51.056	50.505	54.38	55.839	56.228	40.647	41.786	45.848	44.251	43.206	45.652	43.945	38.571	37.868	38.235	41.544	45.39	47.5	41.544	51.712	50.177		68.635	80.524	75.273	76.812	61.538	63.571	51.042
osmo_wtf3	28.102	27.372	28.114	27.018	28.47	25.725	25.725	25.735	27.206	25.342	25.168	28.269	25.912	23.779	24.453	25.912	34.432	39.568	41.727	52.669	51.773	48.98	51.095	52.381	49.821	35.74	40.511	41.758	43.06	42.349	43.956	42.254	33.942	33.086	33.333	38.889	43.165	45.62	35.185	52.249	49.104	68.635		81.273	74.539	73.162	59.22	59.783	47.887
osmo_wtf20	34.799	34.799	34.643	33.099	35	33.212	33.212	32.841	33.21	31.615	31.313	38.929	37.269	33.882	35.424	36.531	43.704	50.365	52.555	63.082	62.857	57.483	62.593	65.556	60.289	47.445	46.739	49.451	49.47	48.41	50.368	47.902	41.667	40.672	41.418	46.269	51.439	52.536	44.03	60.208	57.706	80.524	81.273		83.764	82.353	68.44	68.841	54.895
osmo_wtf19	34.52	35.231	34.375	34.247	35.417	34.043	34.043	34.05	34.05	32.776	31.803	39.236	36.918	33.654	34.409	36.918	43.885	50	52.482	61.21	58.865	57.483	64.029	65.468	64.875	50.36	46.595	49.104	50.53	49.823	48.387	49.65	43.478	40.58	39.13	43.478	51.246	53.261	42.754	60.554	64.516	75.273	74.539	83.764		85.294	76.241	76.449	59.79
osmo_wtf40	36	36.727	35.816	35.664	36.879	35.507	35.507	34.799	34.066	33.447	32.441	41.489	38.828	35.294	37.363	35	45.956	53.986	52.65	61.091	57.951	56.61	63.603	61.649	69.534	53.676	48.352	51.648	53.069	52.347	50.549	52.857	44.815	41.481	41.852	45.185	53.455	54.815	44.074	59.717	66.3	76.812	73.162	82.353	85.294		73.852	84.387	55.749
osmo_wtf30	35.069	35.764	34.237	34.114	34.915	34.256	34.256	33.916	34.615	33.333	32.372	40	36.014	32.602	34.266	34.266	42.456	47.751	49.135	56.944	60.702	59.864	60	60.351	61.538	48.07	45.583	49.47	50.523	49.826	48.41	49.655	42.403	39.576	38.869	43.11	50.175	53.357	40.636	57.679	65.018	61.538	59.22	68.44	76.241	73.852		86.572	62.069
osmo_wtf41	36	36.727	35.461	36.014	36.525	35.507	35.507	35.531	35.531	34.13	33.11	42.199	37.729	33.987	35.897	33.571	45.221	52.536	51.237	60.364	55.83	55.254	62.132	60.215	68.817	51.471	47.985	51.648	53.069	52.347	50.183	51.786	45.556	42.593	41.852	46.296	52.364	56.296	43.333	60.424	65.568	63.571	59.783	68.841	76.449	84.387	86.572		61.672
osmo_wtf16	34.828	35.862	34.343	33.887	35.017	34.138	34.138	35.417	34.375	32.792	31.529	37.124	34.483	31.269	32.414	34.483	37.153	39.726	42.123	49.141	46.075	50.166	44.637	44.291	47.931	41.869	44.561	43.86	47.018	45.965	44.561	47.018	42.456	38.947	38.596	42.456	45.296	44.912	41.053	52.759	49.477	51.042	47.887	54.895	59.79	55.749	62.069	61.672
osmo_wtf24	36.101	36.823	35.563	35.417	36.62	35.252	35.252	35.273	35.273	33.898	32.89	40.493	39.273	34.74	36.364	35.461	46.35	52.158	50.877	65.704	58.596	61.565	58.394	58.007	58.156	47.08	49.265	53.309	56.522	55.797	54.412	54.122	45.588	42.279	41.544	47.426	56.934	57.721	44.853	69.149	61.397	61.702	59.353	69.065	71.223	70.221	72.34	76.103	73.427
osmo_wtf25	34.948	34.948	35.473	33.667	35.473	33.564	33.564	35.192	36.585	33.225	32.907	37.584	35.64	31.677	33.218	35.294	43.554	48.973	50.685	63.918	58.562	61.13	56.944	59.722	57.785	43.056	50	51.056	55.282	54.225	54.225	54.225	44.366	41.197	41.549	47.183	53.846	55.986	43.662	70.934	59.091	62.5	63.251	71.228	72.281	66.434	73.01	73.077	78.169
osmo_wtf32	35.192	35.54	34.014	34.228	35.374	33.681	33.681	35.088	35.088	33.77	33.119	39.456	37.544	33.333	35.088	36.491	45.07	50.347	52.083	65.157	60.417	62.963	57.746	61.268	59.298	44.014	48.227	51.418	54.77	54.064	52.128	52.098	45.39	41.489	40.78	46.099	53.169	54.61	43.617	72.318	60.993	63.158	63.701	72.598	73.665	68.085	74.737	74.823	74.825
octo_wtf6	35.636	35.636	35.106	34.266	35.106	33.696	33.696	35.897	35.897	32.765	32.441	33.451	29.348	26.537	27.536	26.502	34.672	40.143	38.462	44.604	44.056	45.424	41.818	40.78	43.463	38.745	55.431	62.172	64.207	61.993	63.296	65.693	44.569	43.82	41.199	50.562	66.543	61.852	43.071	50.355	48.162	44.876	44.765	50.538	54.48	54.212	56.537	58.608	51.579
octo_wtf7	34.155	33.803	33.677	33.898	34.364	32.982	32.982	36.17	34.043	32.45	31.818	34.812	28.772	25.786	25.614	26.37	28.269	31.359	30.612	37.544	33.22	37.542	36.972	33.677	35.274	31.071	48.913	44.203	46.071	44.643	46.014	45.583	60.727	51.636	53.455	47.101	49.275	44.803	53.818	44.33	45.196	39.041	36.014	42.014	46.528	46.454	49.658	51.064	47.619
octo_wtf20	39.063	38.281	39.231	39.394	40.769	35.714	35.714	39.844	39.453	36.9	35.74	39.394	34.47	30.64	31.439	31.111	32.959	34.545	33.688	36.786	33.916	34.768	39.179	37.638	35.689	32.472	49.817	43.284	42.5	40.357	43.333	39.085	58.608	66.279	59.924	53.759	41.667	41.606	61.45	40.138	40.502	41.219	36.594	42.909	44.17	43.682	44.828	46.931	41.781
octo_wtf22	37.5	37.121	38.06	38.235	39.552	37.218	37.218	39.394	38.258	36.201	35.088	37.778	33.829	29.801	30.112	30.072	32.463	34.909	33.688	37.857	34.965	35.43	40.149	37.818	36.396	33.456	51.46	43.911	44.128	42.349	44.444	40.493	61.172	63.359	63.118	55.263	42.754	43.066	60.076	40.83	40.502	40.502	35.379	44	44.876	43.682	45.172	47.292	42.808
octo_wtf46	38.258	37.879	38.007	38.545	39.483	37.358	37.358	40.076	38.55	35.816	35.069	38.828	35.094	31.208	31.321	31.618	33.84	35.926	35.018	40.659	36.559	37.966	41.667	38.376	38.768	36.641	52.632	45.627	46.494	44.649	46.183	43.066	63.118	63.922	63.529	55.426	45.113	43.82	61.961	43.262	42.647	42.336	36.765	44.444	47.101	46.667	48.057	50	45.965
octo_wtf49	36.531	36.162	36.364	36.559	37.455	35.294	35.294	37.638	35.793	33.916	33.562	36.823	31.884	28.479	28.986	28.622	31.387	33.096	32.292	37.5	36.014	35.762	38.909	36.17	37.102	33.091	47.292	42.238	43.772	41.637	42.754	41.549	61.538	57.249	56.506	50	41.935	43.796	56.134	41.869	42.294	39.649	35.587	43.06	45.583	45.126	46.207	48.375	43.493
octo_wtf21	39.13	38.735	38.462	38.636	39.615	35.361	35.361	39.841	39.044	35.793	35.74	37.879	33.852	30.345	31.128	30.798	32.692	34.701	33.818	36.996	33.692	34.576	39.847	38.636	35.87	33.462	47.148	44.961	44.074	41.852	44.615	41.241	61.977	63.71	57.937	51.563	43.233	42.322	60.317	40.071	40.809	42.279	36.803	44.776	46.014	44.815	44.876	47.778	44.561
octo_wtf52	35.955	35.206	35.401	35.252	36.131	34.328	34.328	37.358	35.849	32.982	33.333	36.594	33.209	29.568	29.851	29.455	33.083	34.799	33.929	39.636	37.011	37.71	41.199	37.591	38.849	35.227	47.584	43.233	45.055	43.956	45.283	42.754	65.66	58.14	60.853	51.724	47.368	43.866	58.527	42.958	43.431	41.155	35.636	44.322	46.043	46.324	47.719	50	45.993
octo_wtf66	36.194	35.821	35.636	35.842	36.727	34.944	34.944	37.218	35.714	33.217	33.562	35.018	31.227	27.815	28.253	27.899	29.963	32.482	31.673	37.729	35.484	35.932	39.552	36.727	37.681	33.955	48.148	43.704	45.62	43.431	44.238	43.682	62.03	57.634	56.87	49.811	43.015	43.82	59.16	41.489	43.015	40.647	37.226	44.891	48.913	47.407	49.117	51.481	47.719
octo_wtf67	31.636	31.273	30.496	30.769	31.206	30.072	30.072	32.353	31.136	29.01	29.431	30.282	27.899	24.919	25	24.735	26.277	29.749	29.021	33.813	31.119	33.559	34.545	32.27	32.862	29.091	45.725	40	41.606	39.416	40.149	40.433	57.249	51.301	50.929	45.556	38.971	39.63	51.673	37.589	38.235	32.862	28.52	35.484	39.068	38.095	39.576	40.659	38.246
octo_wtf8	35.495	34.812	36.177	37.884	38.225	35.034	35.034	37.201	35.836	38.225	36.789	37.627	29.53	26.284	26.51	26.557	27.027	30.363	29.677	34.768	32.143	32.407	35.017	32.566	33.77	29.966	48.495	41.472	43.234	41.254	41.611	40.196	59.322	58.763	59.107	51.02	40.864	41.892	58.419	39.871	40.864	38.762	34.323	41.254	42.623	43.478	42.308	44.147	41.401
octo_wtf33	36.17	35.461	36.525	37.943	38.298	34.982	34.982	37.943	36.525	37.413	36.644	38.732	30.314	26.875	27.178	27.211	27.368	30.822	30.1	35.395	32.66	33.227	36.713	34.13	36.054	31.818	51.042	43.056	44.863	42.808	43.206	43.051	61.268	60.357	59.286	53.71	42.759	43.86	58.571	41	42.069	39.527	36.301	42.808	44.558	46.181	44.186	47.222	42.904
octo_wtf23	36.293	35.135	35.714	35.926	37.218	33.585	33.585	38.132	37.354	34.657	34.276	38.806	35.769	31.399	31.538	31.461	33.206	35.556	34.657	38.545	34.875	35.69	41.445	40.075	38.129	35.878	51.698	44.231	43.382	42.279	43.893	39.855	61.887	63.492	63.386	54.651	47.368	42.751	61.024	40.845	41.971	44.526	38.745	48.148	46.763	48.162	45.263	48.529	44.599
octo_wtf62	34.296	33.935	33.803	34.028	34.859	33.094	33.094	36.364	35.273	32.881	32.558	37.413	32.014	28.939	29.496	29.474	30.072	33.096	32.986	38.929	35.417	38.047	38.989	36.62	36.842	34.432	53.532	44.61	46.52	45.055	45.353	44.203	62.313	54.851	57.09	50.929	49.442	44.853	56.343	45.07	45.985	41.754	36.201	45.196	46.619	48	48.772	49.091	46.341
octo_wtf71	37.41	36.691	39.362	38.112	39.007	36.559	36.559	40.288	39.568	36.177	34.783	37.676	31.802	28.165	28.975	28.966	29.181	33.916	33.106	38.947	34.812	36.424	38.298	35.986	35.862	32.979	54.152	43.321	44.84	44.84	46.209	43.31	61.594	57.246	63.406	54.874	42.652	46.57	58.696	43.945	44.444	42.414	39.085	45.105	46.154	47.857	46.552	47.857	44.863
octo_wtf12	36.296	35.185	34.657	34.875	35.74	34.317	34.317	38.06	36.94	34.722	34.694	37.993	30.996	27.632	27.675	28.058	29.74	32.971	32.155	35.484	34.035	35.017	38.148	35.74	35.816	33.209	52.985	46.792	47.619	46.154	46.415	45.29	57.678	57.471	59.004	53.788	51.504	46.125	55.172	41.901	44.526	42.143	38.043	44.928	44.286	47.445	46.316	48.54	44.599
octo_wtf14	38.722	37.594	37.729	38.628	39.194	37.079	37.079	40.909	39.394	37.324	36.552	41.091	33.333	29.667	29.588	30.292	30.943	34.559	33.333	37.818	34.875	35.69	39.85	36.63	37.77	34.701	53.137	45.522	46.377	44.928	46.816	43.369	61.194	61.154	63.462	56.654	50.558	46.097	60	44.366	45.255	43.841	37.591	45.956	45.683	48.529	45.965	48.529	43.206
octo_wtf17	36.364	36.364	35.461	35.315	35.816	34.42	34.42	36.264	36.264	33.788	34.448	35.563	30.072	27.184	27.536	26.855	29.927	33.333	32.517	41.367	39.161	40.678	39.273	36.879	38.869	34.182	57.407	51.481	54.38	52.19	52.593	54.152	54.444	51.111	48.889	56.667	53.676	53.333	51.111	47.872	47.426	42.403	42.96	49.462	50.538	51.648	51.237	52.381	50.526
octo_wtf68	35.64	35.64	35.154	35.69	36.519	34.828	34.828	35.986	35.294	33.553	33.226	36.271	30.952	27.829	27.891	27.907	28.136	32.441	31.699	38.384	33.876	39.61	37.838	34.323	36.184	31.757	48.797	44.33	46.102	44.068	43.299	43.289	57.241	51.034	51.034	46.048	43.686	43.986	51.724	43.564	44.369	40.789	37.584	43.333	46.667	47.959	47.697	48.98	46.078
octo_wtf25	41.538	41.538	40.824	41.328	41.948	39.163	39.163	42.248	42.248	41.007	40.141	42.751	36.015	31.633	33.333	33.209	36.782	41.418	39.636	44.689	42.652	41.356	46.183	44.195	43.116	36.742	59.925	57.197	56.204	54.015	56.654	51.625	52.434	58.431	54.864	61.004	56.134	56.554	54.864	49.645	48.529	50	47.212	54.851	52.174	54.444	53.004	55.556	49.474
octo_wtf32	36.17	35.816	35.64	35.836	36.332	34.043	34.043	37.5	36.786	35.667	34.641	36.426	30.035	26.582	26.855	27.241	30.249	32.517	31.058	40.702	37.884	40.066	39.007	36.332	37.931	34.892	63.869	54.015	57.762	55.596	53.65	53.597	55.839	56.204	54.015	63.139	54.71	52.708	54.015	48.601	45.878	41.522	42.254	48.252	48.252	50.357	48.621	51.071	49.481
octo_wtf48	39.773	39.773	39.114	38.909	40.221	38.113	38.113	40.076	40.84	37.943	37.153	39.56	35.849	31.879	32.83	32.353	34.221	38.433	36.727	42.125	39.146	39.661	43.939	40.59	41.727	39.015	62.5	55.939	54.982	52.768	53.846	51.46	53.409	56.641	53.516	63.281	53.008	51.685	56.641	45.035	44.853	47.059	43.704	51.493	50	51.852	50.53	53.333	49.474
octo_wtf61	37.546	36.803	37.363	36.823	37.729	34.815	34.815	36.803	37.918	35.563	35.172	39.273	32.847	29.316	29.927	29.893	33.824	36.823	35.211	42.908	40	40.132	42.857	40	39.024	36.462	59.42	50.183	50.883	49.47	51.103	47.203	51.449	53.731	54.104	62.687	55.072	49.275	55.597	46.392	45.907	46.263	44.803	53.43	49.123	51.254	48.973	51.971	47.619
octo_wtf78	37.269	38.007	37.41	37.943	37.41	36.162	36.162	40.892	39.033	37.37	35.932	38.929	31.618	28.525	30.515	29.391	35.926	42.545	40.78	44.643	43.403	44.781	45.387	43.885	42.807	39.483	56.767	70.722	68.498	65.568	67.681	62.044	50.186	48.669	46.388	55.513	66.791	63.971	47.529	51.064	50	49.64	46.545	54.545	52.669	55.636	54.737	56.364	50.175
osmo_wtf5	53.2	54	53.785	55.294	58.167	47.529	47.529	54.8	54	54.962	52.239	62.205	55.512	48.432	53.937	53.077	27.881	34.783	33.216	35.231	30.314	31.683	36.431	36.397	35.211	34.572	35.636	37.687	35.461	34.752	34.926	34.266	35.145	37.548	35.472	36.194	35.971	35.612	37.358	38.832	40.214	42.349	30.714	41.155	41.404	43.728	42.808	44.803	43.243
osmo_wtf8	29.74	28.625	28.986	27.143	28.261	25.818	25.818	30.189	29.811	26.829	26.027	29.496	26.255	22.945	25.483	24.06	25.095	29.63	29.242	32.222	30.325	29.795	30.303	28.889	28.832	31.955	31.868	32.342	32.734	31.655	31.136	31.915	29.412	30.075	30.827	33.086	32.491	32.609	30.451	32.99	30.961	33.451	25.979	32.74	32.042	34.532	30.928	32.734	33.219
osmo_wtf14	29.008	28.244	27.881	26.374	27.138	25	25	29.07	29.07	26.429	25.263	28.571	25.49	22.222	24.314	22.989	23.846	28.464	28.102	30.712	28.832	28.72	28.736	27.444	27.306	30.038	30.37	31.579	32	30.909	30	31.183	29.368	30.651	30.418	31.579	31.022	31.868	30.418	31.597	29.856	32.384	25.18	31.655	31.317	33.091	29.861	31.273	32.18
osmo_wtf22	29.348	28.623	27.915	26.829	27.915	26.619	26.619	29.779	29.412	26.531	26.087	29.474	27.444	24.08	26.692	24.908	26.866	30.657	30.249	34.432	32.143	31.864	32.342	30.797	31.769	34.572	33.094	32.609	34.164	33.096	32.852	33.688	31.636	32.472	32.103	34.432	33.929	33.692	32.103	36.082	32.746	33.798	28.07	34.386	34.495	36.299	31.973	34.875	34.932
osmo_wtf39	27.915	27.208	26.552	25.51	26.552	25.795	25.795	28.315	27.957	25.249	24.837	28.082	26.007	23.203	25.641	23.929	25.735	29.496	29.123	32.852	30.986	30.435	31.136	29.643	30.605	33.333	31.56	31.56	33.333	31.93	31.317	32.867	31.183	31.636	30.909	32.852	33.099	32.862	31.273	35.254	31.597	32.99	26.644	32.872	33.333	35.088	30.872	33.684	33.784
FY29033_wtf1	13.284	13.284	14.182	13.978	14.182	12.186	12.186	14.074	12.915	13.287	13.402	15.185	14.504	12.881	14.122	14.391	11.636	13.523	13.194	13.937	15.358	13.916	15.636	15.054	13.793	14.079	14.236	14.591	13.898	13.898	14.386	12.375	12.847	13.091	13.357	13.167	13.495	13.495	14.44	12.583	15.068	11.644	9.278	13.194	12.838	13.448	14.851	14.828	13.681
FY29033_wtf35	12.871	12.871	12.704	13.826	14.007	11.897	11.897	12.583	11.551	13.208	13.003	14.238	13.946	12.538	13.265	13.531	11.401	12.78	12.5	12.853	14.154	13.196	14.332	13.826	13.354	13.269	13.438	13.738	13.15	13.761	12.934	12.689	11.875	13.029	11.974	11.821	12.773	13.084	13.269	11.976	13.889	11.111	8.359	12.188	12.5	12.733	13.731	13.975	12.979
FY29033_wtf5	14.022	14.391	14.545	15.412	14.545	12.545	12.545	13.704	11.808	13.287	13.402	14.815	14.504	13.22	14.504	14.76	13.091	14.947	14.583	14.286	15.7	13.916	16	15.412	14.483	14.029	14.583	13.879	13.22	14.237	15.088	13.378	11.806	13.091	12.635	13.167	13.841	14.187	13.357	12.914	15.068	13.014	10.997	13.542	13.176	14.138	15.182	15.172	14.007
FY29033_wtf6	13.284	13.653	13.455	13.978	14.182	11.47	11.47	13.383	12.222	13.636	14.089	14.444	14.885	13.559	14.885	15.129	13.091	15.302	14.931	14.634	16.041	14.239	16.364	15.771	15.172	14.029	13.684	13.669	13.014	14.041	14.184	12.838	11.228	12.132	12.044	12.59	13.287	13.841	12.774	11.921	14.041	12.671	10.309	13.194	12.5	13.793	14.521	14.828	12.704
FY29033_wtf10	15.129	15.129	14.909	14.695	15.636	13.62	13.62	15.242	14.074	15.035	15.464	15.926	15.267	13.559	14.122	15.129	12	13.879	13.542	14.286	13.993	12.945	15.273	15.054	13.103	12.95	14.035	14.029	13.356	14.384	14.184	13.176	12.281	13.235	13.139	12.95	12.587	13.841	13.869	12.583	14.041	12.671	10.653	13.542	13.176	13.448	13.861	14.138	12.704
FY29033_wtf17	14.391	14.391	14.182	13.978	14.909	12.903	12.903	14.498	13.333	14.336	14.777	15.185	15.649	13.559	14.504	15.498	12.364	14.235	13.889	14.634	13.993	12.945	15.273	15.054	13.103	12.95	13.333	13.309	12.671	13.699	13.475	12.5	11.579	12.5	12.409	12.23	11.888	13.149	13.139	12.914	14.041	12.671	9.966	13.194	12.838	13.103	13.201	13.448	12.704
FY29033_wtf25	15.867	15.867	15.636	15.771	16.364	14.337	14.337	15.185	14.022	15.035	15.464	15.926	16.412	14.237	15.267	16.236	12.727	14.947	14.583	16.028	15.017	14.239	15.636	15.412	13.793	13.309	14.236	13.523	12.881	13.898	14.737	13.043	12.153	13.091	13.357	13.523	12.803	14.187	13.718	14.238	14.384	13.356	10.997	14.236	13.176	13.793	13.531	14.138	14.007
FY29033_wtf20	13.514	13.514	13.333	13.158	14	12.171	12.171	13.22	11.824	12.54	12.975	13.559	14.286	14.716	13.24	14.527	11.333	13.399	12.78	14.423	13.522	12.874	14	13.816	12.381	11.881	12.46	11.765	11.25	12.188	12.903	12.037	10.543	11.667	11.589	12.092	12.102	12.102	12.252	12.844	12.934	13.565	11.709	14.058	13.084	13.968	13.11	13.651	13.855
FY29033_wtf42	14.187	14.187	14.334	14.478	15.017	12.795	12.795	14.583	13.149	14.145	14.239	15.625	16.071	16.054	15	15.225	11.945	13.712	13.399	14.426	13.826	12.844	15.358	15.152	13.312	13.514	13.399	13.378	12.78	13.738	13.531	12.618	11.765	12.969	12.542	12.375	12.704	13.681	13.22	12.812	14.194	12.903	11.003	14.379	13.694	13.961	13.396	13.961	13.538
FY29033_wtf40	14.947	14.947	15.439	15.917	15.439	13.495	13.495	15	14.235	14.527	14.95	15.714	14.029	12.54	12.59	14.286	12.371	13.468	12.829	14.521	13.592	12.923	14.089	13.559	12.418	12.245	13.758	13.058	12.459	13.115	14.237	12.945	11.745	12.982	12.892	13.402	13.043	13.378	13.24	14.103	14.57	13.576	11.296	13.087	12.745	14	13.419	14	13.249
FY29033_wtf2	11.538	11.538	11.168	12.563	12.183	11.224	11.224	11.795	10.513	11.111	10.488	11.929	12.435	13.418	12.272	12.308	11.568	11.421	11.222	13.75	13.3	13.033	13.625	13.131	12.655	13.265	13.217	11.364	12.01	12.5	12.594	11.736	11.721	13.299	11.765	12.468	12.219	11.194	13.299	12.833	13.086	10.396	10.123	12.469	12.469	12.655	12.981	13.151	13.158
FY29033_wtf41	11.796	11.796	11.671	12.861	12.467	11.467	11.467	11.796	10.992	11.34	10.941	12.202	12.737	12.531	12.842	12.869	12.366	12.5	12.272	14.621	14.139	13.827	14.516	14.248	13.731	14.933	14.063	11.873	12.532	13.043	13.421	12.5	11.719	13.636	12.299	13.298	13.021	11.948	13.904	13.384	13.402	11.658	10.825	13.542	13.265	13.731	13.534	13.99	12.968
FY29033_wtf39	10.922	10.922	9.856	11.19	11.538	10.628	10.628	11.165	9.951	10.539	9.954	11.538	11.52	13.203	11.358	11.408	10.949	11.058	10.875	13.033	12.85	12.387	13.139	12.679	12.235	12.802	12.766	11.005	11.628	12.093	11.695	11.833	11.348	12.833	11.38	12.289	11.584	11.085	13.317	12.184	12.412	10.329	9.602	12.293	12.297	12.471	12.785	12.941	12.727
FY29033_wtf36	10.162	10.162	9.382	10.658	10.984	9.885	9.885	10.624	9.931	10.268	9.934	10.755	10.956	13.023	11.268	11.085	11.111	10.526	10.36	13.093	12.695	12.473	12.963	12.756	12.332	13.333	12.387	11.39	11.752	12.195	11.818	11.504	11.261	12.673	11.29	11.927	11.937	11.236	12.903	11.842	12.277	9.843	9.375	12.387	12.389	12.556	12.418	12.78	12.798
FY29033_wtf16	10.864	10.864	10.269	10.412	11.002	10.565	10.565	12.099	10.123	10.476	10.588	10.269	10.973	12.438	10.723	11.275	9.653	11.002	10.817	13.012	12.114	12.128	12.871	12.409	11.722	13.268	12.019	12.165	12.057	12.766	12.621	12.028	9.615	10.837	10.591	11.765	11.298	11.271	11.33	11.449	11.905	10.263	9.524	11.538	12.028	12.44	12.065	12.201	11.547
FY29033_wtf19	10.526	10.287	10.19	11.268	10.19	10	10	11.005	9.33	10.162	10.502	10.19	11.836	13.043	11.111	11.876	10.552	10.9	10.723	12.85	11.982	12	12.47	12.264	11.833	13.095	12.121	11.321	11.239	11.697	11.529	11.442	10.49	11.695	10.74	11.876	11.189	11.395	11.217	10.884	11.085	9.954	8.776	11.189	11.442	11.833	11.261	11.833	11.659
FY29033_wtf33	10.099	10.099	10.488	10.87	10.244	9.804	9.804	11.576	9.852	9.739	10.094	9.756	11.194	12.687	10.945	11.491	10.123	10.732	10.552	12.74	11.848	11.644	12.346	12.136	11.456	12.99	11.99	11.408	11.321	11.557	11.864	11.059	9.832	10.565	10.811	11.98	10.791	11.005	11.302	10.49	10.926	9.762	9.026	11.031	10.824	11.695	10.648	11.217	11.06
FY29033_wtf23	13.018	12.722	12.281	12.717	13.45	12.353	12.353	14.201	12.426	12.465	12.849	11.696	12.874	12.222	12.575	13.196	11.869	12.281	12.034	14.943	14.407	14.054	14.54	14.244	13.39	15.294	14.9	13.663	13.764	14.607	15.072	14.286	12.321	13.274	13.569	14.663	13.467	14	14.159	12.465	13.031	11.08	11.048	13.754	13.165	13.675	13.462	13.675	14.208
FY29033_wtf26	12.605	12.605	12.188	13.151	13.573	12.256	12.256	14.006	12.325	12.634	11.936	12.188	12.748	13.536	12.465	13.056	11.236	11.634	11.413	14.441	13.673	13.368	14.326	13.774	12.703	13.649	14.402	12.948	13.067	13.867	14.011	13.298	12.5	13.687	13.408	14.444	13.043	13.279	13.966	12.368	12.903	10.782	11.022	13.587	13.032	13.243	13.577	13.514	14.026
FY29033_wtf24	13.006	13.006	12.857	12.712	13.429	12.356	12.356	13.295	13.295	13.296	12.842	13.429	13.45	14.127	13.743	13.467	12.464	13.143	12.885	14.888	14.365	13.757	15.072	14.489	13.37	14.943	15.126	13.068	13.462	14.286	13.881	13.425	12.045	13.256	12.968	14.613	12.885	12.849	14.121	13.279	13.573	11.944	11.911	14.006	13.425	13.649	13.441	13.928	13.369
FY29033_wtf37	13.814	13.814	13.353	14.076	14.837	13.314	13.314	14.715	14.114	13.793	13.314	13.824	13.554	13.26	13.554	13.569	11.642	12.353	12.104	14.74	14.205	13.587	14.328	14.035	13.467	14.793	15.274	13.743	13.842	14.689	15.16	14.366	12.968	14.837	14.243	14.749	13.256	13.218	16.024	13.37	13.675	11.429	11.966	14.121	13.239	13.467	13.536	14.04	13.187
FY29033_wtf28	11.685	11.685	11.29	11.968	12.634	11.351	11.351	12.772	11.685	12.01	11.34	11.559	12.088	13.405	11.813	11.86	11.172	10.753	10.554	13.492	13.021	12.75	13.351	12.834	12.336	12.973	13.984	11.765	12.435	13.212	13.333	12.403	12.137	13.008	13.008	13.747	11.609	11.579	13.821	12.02	12.794	10.209	10.705	12.929	12.403	12.861	12.69	12.861	13.636
FY29033_wtf8	11.846	11.846	10.899	12.668	11.989	12.329	12.329	12.397	11.295	11.376	11.749	11.989	13.37	12.987	13.37	13.115	12.707	13.624	13.369	15.55	14.776	14.43	15.47	14.905	14.628	16.164	13.369	13.55	13.911	14.436	14.054	13.351	12.299	14.011	12.363	12.568	13.369	12.8	14.56	13.472	13.757	12.732	11.111	14.706	14.66	15.16	13.882	14.096	14.066
FY29033_wtf38	11.45	11.196	11.083	12.469	11.335	11.139	11.139	11.959	10.687	11.029	11.138	11.335	12.596	14.07	12.596	12.374	11.224	12.594	12.376	14.392	13.692	13.647	14.286	13.534	13.547	14.684	13.366	12.782	12.895	13.382	13.25	13.107	11.386	12.944	11.675	12.879	12.624	12.593	12.944	12.26	12.745	11.548	10.049	12.624	13.107	13.547	13.604	13.547	12.827
FY29033_wtf30	12.668	12.399	11.733	12.665	12.267	12.064	12.064	12.668	11.321	11.658	12.02	12.267	12.807	12.977	13.079	12.299	11.528	12.698	12.468	14.323	13.846	13.547	14.209	13.684	13.437	14.894	13.506	12.895	13.265	13.776	13.911	13.74	12.468	13.867	12.533	13.263	13.506	13.472	14.133	12.846	13.111	11.598	10.283	13.506	13.486	13.695	13.75	13.953	13.93
FY29033_wtf27	11.919	11.919	11.207	11.932	12.644	12.139	12.139	13.081	11.919	11.421	11.813	11.494	12.059	12.465	12.353	12.392	12.245	12.356	12.113	14.972	14.722	14.096	14.869	14.286	13.725	15.607	14.407	13.467	14.127	14.958	14.857	13.812	12.147	13.372	13.081	14.162	13.559	13.483	14.244	12.807	13.37	10.894	11.142	13.803	13.499	14.006	13.784	14.006	14.516
FY29033_wtf4	11.978	11.978	11.295	12.262	12.397	11.634	11.634	11.978	11.699	11.765	11.609	12.672	12.188	12.929	11.911	11.957	12.912	11.924	11.702	14.667	13.648	13.602	14.286	13.747	13.492	14.986	13.784	12.603	12.997	13.263	13.388	12.963	12.162	13.889	12.222	12.707	12.703	11.86	14.722	13.089	13.904	11.26	10.428	13.514	13.228	13.978	13.506	13.978	13.437
FY29033_wtf9	10.437	10.437	9.856	10.714	10.817	10.072	10.072	10.437	10.194	10.304	10.185	10.979	10.552	12.71	10.312	10.377	10.714	10.588	10.417	12.065	11.442	11.258	11.667	11.241	11.06	12.293	11.502	10.451	10.624	10.855	10.9	10.829	9.859	11.298	9.856	10.526	10.329	9.836	12.019	10.959	11.628	10.023	8.837	11.268	10.829	11.449	11.111	11.449	11.061
FY29033_wtf22	12.356	12.356	12.216	13.483	12.784	12	12	11.782	11.494	11.57	11.413	12.5	12.286	12.202	12	12.045	14.164	12.849	12.603	15.11	14.324	13.99	15.014	14.722	14.169	15.73	14.206	12.429	13.115	13.388	13.239	13.624	13.092	14.9	13.181	14.245	13.649	13.056	15.186	12.938	13.774	12.431	11.295	14.206	14.169	14.958	14.171	14.958	14.362
FY29033_wtf18	11.268	11.033	10.698	11.29	11.395	10.514	10.514	11.033	10.798	11.111	10.762	11.395	11.215	13.318	10.514	10.805	11.369	10.393	10.227	12.472	11.607	11.663	12.529	11.872	11.685	12.442	12.128	10.417	11.036	11.261	11.316	11.011	10.297	11.71	10.539	11.189	10.297	10.046	12.178	11.581	12.472	9.84	9.751	11.213	11.461	12.073	11.726	12.073	11.921
FY29033_wtf13	10.995	10.995	11.14	11.538	11.399	10.417	10.417	10.733	10.471	10.327	9.95	10.622	10.156	11.735	10.156	10.23	10.594	9.439	9.273	12.06	11.386	10.952	11.886	11.421	10.723	11.795	11.959	9.794	10.5	11	11.311	11.222	10.941	12.01	11.749	12.468	10.687	10.66	12.533	10.37	11.587	9.343	9.824	11.196	10.973	11.899	11.52	11.899	11.951
FY29033_wtf31	12.432	12.162	12.299	12.963	12.567	11.29	11.29	11.351	11.081	11.688	11.538	12.567	11.828	13.421	11.559	11.346	12	11.842	11.628	12.953	12.245	12.01	13.333	12.827	12.082	13.492	13.123	11.702	11.856	12.113	11.406	12.339	10.499	12.129	10.782	12.332	11.024	10.995	12.938	12.214	12.468	11.719	10.909	12.598	12.596	13.055	12.374	13.055	11.307
[truncated: 64 more columns]

## Sheet: 1f
	Genes used for FLEX motif discovery
S. pombe gene ID	S. pombe gene name	S. octosporus gene ID	S. osmophilus gene ID	S. cryophilus gene ID
SPAC1610.03c	crp79	SOCG_01506	g4289	SPOG_04569
SPAC17A5.04c	mde10	SOCG_01522	g4273	SPOG_04553
SPAC17G8.10c	dma1	SOCG_04269	g1404	SPOG_00270
SPAC17G8.12	sec3	SOCG_04267	g1402	SPOG_00272
SPAC1A6.06c	meu31	SOCG_02171	g2237	SPOG_00654
SPAC22F3.04	mug62	SOCG_03645	g3391	SPOG_04092
SPAC22F8.05		SOCG_00931	g5642	SPOG_01095
SPAC22H10.12c	gdi1	SOCG_04254	g1389	SPOG_00285
SPAC23D3.14c	aah2	SOCG_04177	g1293	SPOG_00365
SPAC24C9.05c	mug70	SOCG_01671	g4401	SPOG_03860
SPAC24C9.15c	spn5	SOCG_01661	g4388	SPOG_03871
SPAC24H6.05	cdc25	SOCG_02457	g1907	SPOG_01544
SPAC25H1.09	mde5	SOCG_00780	g5461	SPOG_01717
SPAC328.03	tps1	SOCG_00450	g5061	SPOG_02053
SPAC3A12.03c	meu34	SOCG_02309	g2072	SPOG_04962
SPAC3A12.14	cam1	SOCG_02327	g2059	SPOG_04949
SPAC4G8.04		SOCG_02037	g3253	SPOG_03974
SPAC6B12.08	epr1	SOCG_04242	g1375	SPOG_00297
SPAC6C3.06c	neo1	SOCG_04283	g1422	SPOG_00257
SPAC6G9.04	spo7	SOCG_04873	g4221	SPOG_04820
SPAC8F11.05c	mug130	SOCG_01739	g4492	SPOG_03791
SPACUNK4.12c	iph1	SOCG_01728	g4479	SPOG_03802
SPACUNK4.15		SOCG_01731	g4482	SPOG_03799
SPAPB2B4.04c	pmc1	SOCG_04529	g2946	SPOG_03728
SPBC1198.12	mfr1	SOCG_02537	g1821	SPOG_01465
SPBC1347.03	meu14	SOCG_01485	g94	SPOG_04592
SPBC14C8.05c	meu17	SOCG_02597	g1742	SPOG_01404
SPBC16A3.13	meu7	SOCG_01004	g5726	SPOG_01021
SPBC1778.04	spo6	SOCG_00199	g3928	SPOG_02784
SPBC17D1.07c	npg1	SOCG_00097	g4042	SPOG_00798
SPBC1861.06c	mug131	SOCG_01572	g50	SPOG_04504
SPBC1D7.03	clg1	SOCG_03211	g4807	SPOG_04681
SPBC21C3.18	spo4	SOCG_01381	g223	SPOG_03124
SPBC21D10.08c		SOCG_00343	g4927	SPOG_02162
SPBC27.03	meu25	SOCG_00015	g4142	SPOG_04463
SPBC28E12.02		SOCG_03249	g4852	SPOG_04643
SPBC2F12.09c	atf21	SOCG_03202	g4796	SPOG_04690
SPBC342.03	gas4	SOCG_00975	g5692	SPOG_01050
SPBC3H7.03c	kgd1	SOCG_03613	g3425	SPOG_04124
SPBC428.07	meu6	SOCG_02683	g1033	SPOG_02279
SPBC646.06c	agn2	SOCG_03552	g3492	SPOG_04186
SPBC649.05	cut12	SOCG_01764	g4521	SPOG_01284
SPBC725.12	nbl1	SOCG_03423	g3637	SPOG_04317
SPBC8D2.19	mde3	SOCG_03351	g3714	SPOG_04389
SPCC1682.08c	mpf2	SOCG_03793	g2626	SPOG_03444
SPCC1682.12c	ubp16	SOCG_03789	g2631	SPOG_03448
SPCC188.12	spn6	SOCG_02888	g785	SPOG_02487
SPCC1919.11	mug137	SOCG_02737	g968	SPOG_02332
SPCC74.09	mug24	SOCG_02664	g1055	SPOG_02259

## Sheet: 1g
	Summary statistics of genome-wide FLEX motif scanning
Species	Total FIMO hits	Number of unreliable hits (P >= 3E-6)	Number of confident hits (P < 3E-6)
S. pombe	8138	7662	476
S. octosporus	7992	7276	716
S. osmophilus	8401	7574	827
S. cryophilus	8558	7660	898

## Sheet: 1h
	Confident hits of FLEX motif scanning
Species	Chr	Start	End	Strand	P value	Motif Sequence
S. pombe	III	43039	43049	+	3.7e-07	GTAAACAAACA
S. pombe	III	141255	141265	-	3.7e-07	GTAAACAAACA
S. pombe	III	155608	155618	-	3.7e-07	GTAAACAAACA
S. pombe	III	204287	204297	+	3.7e-07	GTAAACAAACA
S. pombe	III	222456	222466	-	3.7e-07	GTAAACAAACA
S. pombe	III	381587	381597	-	3.7e-07	GTAAACAAACA
S. pombe	III	401823	401833	+	3.7e-07	GTAAACAAACA
S. pombe	III	531670	531680	+	3.7e-07	GTAAACAAACA
S. pombe	III	624692	624702	-	3.7e-07	GTAAACAAACA
S. pombe	III	624714	624724	-	3.7e-07	GTAAACAAACA
S. pombe	III	702240	702250	+	3.7e-07	GTAAACAAACA
S. pombe	III	1002556	1002566	-	3.7e-07	GTAAACAAACA
S. pombe	III	1177007	1177017	-	3.7e-07	GTAAACAAACA
S. pombe	III	1309423	1309433	+	3.7e-07	GTAAACAAACA
S. pombe	III	1369485	1369495	+	3.7e-07	GTAAACAAACA
S. pombe	III	1581449	1581459	-	3.7e-07	GTAAACAAACA
S. pombe	III	1630375	1630385	+	3.7e-07	GTAAACAAACA
S. pombe	III	1679603	1679613	-	3.7e-07	GTAAACAAACA
S. pombe	III	2017952	2017962	+	3.7e-07	GTAAACAAACA
S. pombe	III	2029454	2029464	-	3.7e-07	GTAAACAAACA
S. pombe	III	2145996	2146006	+	3.7e-07	GTAAACAAACA
S. pombe	III	2231576	2231586	-	3.7e-07	GTAAACAAACA
S. pombe	III	2356211	2356221	-	3.7e-07	GTAAACAAACA
S. pombe	III	2418727	2418737	-	3.7e-07	GTAAACAAACA
S. pombe	II	5574	5584	-	3.7e-07	GTAAACAAACA
S. pombe	II	19704	19714	-	3.7e-07	GTAAACAAACA
S. pombe	II	194470	194480	+	3.7e-07	GTAAACAAACA
S. pombe	II	299154	299164	-	3.7e-07	GTAAACAAACA
S. pombe	II	376182	376192	+	3.7e-07	GTAAACAAACA
S. pombe	II	454096	454106	+	3.7e-07	GTAAACAAACA
S. pombe	II	683982	683992	+	3.7e-07	GTAAACAAACA
S. pombe	II	745936	745946	-	3.7e-07	GTAAACAAACA
S. pombe	II	812943	812953	+	3.7e-07	GTAAACAAACA
S. pombe	II	841570	841580	+	3.7e-07	GTAAACAAACA
S. pombe	II	1095130	1095140	-	3.7e-07	GTAAACAAACA
S. pombe	II	1368870	1368880	+	3.7e-07	GTAAACAAACA
S. pombe	II	1393378	1393388	-	3.7e-07	GTAAACAAACA
S. pombe	II	1461594	1461604	+	3.7e-07	GTAAACAAACA
S. pombe	II	1516838	1516848	+	3.7e-07	GTAAACAAACA
S. pombe	II	1563854	1563864	-	3.7e-07	GTAAACAAACA
S. pombe	II	1566354	1566364	-	3.7e-07	GTAAACAAACA
S. pombe	II	1748042	1748052	-	3.7e-07	GTAAACAAACA
S. pombe	II	1748894	1748904	-	3.7e-07	GTAAACAAACA
S. pombe	II	1954885	1954895	+	3.7e-07	GTAAACAAACA
S. pombe	II	2005220	2005230	-	3.7e-07	GTAAACAAACA
S. pombe	II	2185754	2185764	-	3.7e-07	GTAAACAAACA
S. pombe	II	2495195	2495205	-	3.7e-07	GTAAACAAACA
S. pombe	II	2617762	2617772	+	3.7e-07	GTAAACAAACA
S. pombe	II	2632752	2632762	+	3.7e-07	GTAAACAAACA
S. pombe	II	2811921	2811931	-	3.7e-07	GTAAACAAACA
S. pombe	II	2826373	2826383	+	3.7e-07	GTAAACAAACA
S. pombe	II	2881391	2881401	+	3.7e-07	GTAAACAAACA
S. pombe	II	2971064	2971074	+	3.7e-07	GTAAACAAACA
S. pombe	II	3103041	3103051	-	3.7e-07	GTAAACAAACA
S. pombe	II	3230526	3230536	+	3.7e-07	GTAAACAAACA
S. pombe	II	3241755	3241765	+	3.7e-07	GTAAACAAACA
S. pombe	II	3344016	3344026	-	3.7e-07	GTAAACAAACA
S. pombe	II	3454710	3454720	-	3.7e-07	GTAAACAAACA
S. pombe	II	3597380	3597390	+	3.7e-07	GTAAACAAACA
S. pombe	II	3751696	3751706	-	3.7e-07	GTAAACAAACA
S. pombe	II	3764722	3764732	+	3.7e-07	GTAAACAAACA
S. pombe	II	3822327	3822337	-	3.7e-07	GTAAACAAACA
S. pombe	II	3827080	3827090	-	3.7e-07	GTAAACAAACA
S. pombe	II	3829863	3829873	-	3.7e-07	GTAAACAAACA
S. pombe	II	4066104	4066114	+	3.7e-07	GTAAACAAACA
S. pombe	II	4194853	4194863	+	3.7e-07	GTAAACAAACA
S. pombe	II	4206110	4206120	+	3.7e-07	GTAAACAAACA
S. pombe	II	4322723	4322733	-	3.7e-07	GTAAACAAACA
S. pombe	II	4465370	4465380	+	3.7e-07	GTAAACAAACA
S. pombe	II	4474798	4474808	+	3.7e-07	GTAAACAAACA
S. pombe	II	4493249	4493259	+	3.7e-07	GTAAACAAACA
S. pombe	II	4507340	4507350	+	3.7e-07	GTAAACAAACA
S. pombe	II	4514468	4514478	+	3.7e-07	GTAAACAAACA
S. pombe	I	21710	21720	-	3.7e-07	GTAAACAAACA
S. pombe	I	28861	28871	-	3.7e-07	GTAAACAAACA
S. pombe	I	39494	39504	-	3.7e-07	GTAAACAAACA
S. pombe	I	187712	187722	-	3.7e-07	GTAAACAAACA
S. pombe	I	190022	190032	+	3.7e-07	GTAAACAAACA
S. pombe	I	204685	204695	+	3.7e-07	GTAAACAAACA
S. pombe	I	482693	482703	+	3.7e-07	GTAAACAAACA
S. pombe	I	587480	587490	-	3.7e-07	GTAAACAAACA
S. pombe	I	707815	707825	-	3.7e-07	GTAAACAAACA
S. pombe	I	758985	758995	-	3.7e-07	GTAAACAAACA
S. pombe	I	1087305	1087315	-	3.7e-07	GTAAACAAACA
S. pombe	I	1160081	1160091	-	3.7e-07	GTAAACAAACA
S. pombe	I	1402974	1402984	+	3.7e-07	GTAAACAAACA
S. pombe	I	1424366	1424376	-	3.7e-07	GTAAACAAACA
S. pombe	I	1759309	1759319	+	3.7e-07	GTAAACAAACA
S. pombe	I	1795037	1795047	+	3.7e-07	GTAAACAAACA
S. pombe	I	1816514	1816524	-	3.7e-07	GTAAACAAACA
S. pombe	I	1906033	1906043	+	3.7e-07	GTAAACAAACA
S. pombe	I	2053469	2053479	+	3.7e-07	GTAAACAAACA
S. pombe	I	2106494	2106504	-	3.7e-07	GTAAACAAACA
S. pombe	I	2106812	2106822	+	3.7e-07	GTAAACAAACA
S. pombe	I	2242806	2242816	+	3.7e-07	GTAAACAAACA
S. pombe	I	2538375	2538385	+	3.7e-07	GTAAACAAACA
S. pombe	I	2812728	2812738	-	3.7e-07	GTAAACAAACA
S. pombe	I	2876059	2876069	-	3.7e-07	GTAAACAAACA
S. pombe	I	3076251	3076261	-	3.7e-07	GTAAACAAACA
S. pombe	I	3094944	3094954	-	3.7e-07	GTAAACAAACA
S. pombe	I	3103972	3103982	+	3.7e-07	GTAAACAAACA
S. pombe	I	3285830	3285840	-	3.7e-07	GTAAACAAACA
S. pombe	I	3293112	3293122	-	3.7e-07	GTAAACAAACA
S. pombe	I	3397719	3397729	-	3.7e-07	GTAAACAAACA
S. pombe	I	3478498	3478508	-	3.7e-07	GTAAACAAACA
S. pombe	I	3508446	3508456	-	3.7e-07	GTAAACAAACA
S. pombe	I	3697411	3697421	+	3.7e-07	GTAAACAAACA
S. pombe	I	3847064	3847074	+	3.7e-07	GTAAACAAACA
S. pombe	I	3973743	3973753	-	3.7e-07	GTAAACAAACA
S. pombe	I	4178666	4178676	+	3.7e-07	GTAAACAAACA
S. pombe	I	4362243	4362253	+	3.7e-07	GTAAACAAACA
S. pombe	I	4365457	4365467	+	3.7e-07	GTAAACAAACA
S. pombe	I	4375197	4375207	-	3.7e-07	GTAAACAAACA
S. pombe	I	4448010	4448020	-	3.7e-07	GTAAACAAACA
S. pombe	I	4651959	4651969	+	3.7e-07	GTAAACAAACA
S. pombe	I	4687003	4687013	-	3.7e-07	GTAAACAAACA
S. pombe	I	5099969	5099979	-	3.7e-07	GTAAACAAACA
S. pombe	I	5155780	5155790	+	3.7e-07	GTAAACAAACA
S. pombe	I	5309217	5309227	-	3.7e-07	GTAAACAAACA
S. pombe	I	5309239	5309249	-	3.7e-07	GTAAACAAACA
S. pombe	I	5569670	5569680	+	3.7e-07	GTAAACAAACA
S. pombe	III	50006	50016	+	6.74e-07	GTAAACAAACG
S. pombe	III	204154	204164	+	6.74e-07	GTAAACAAACG
S. pombe	III	348257	348267	+	6.74e-07	GTAAACAAACG
S. pombe	III	397003	397013	-	6.74e-07	GTAAACAAACG
S. pombe	III	758869	758879	-	6.74e-07	GTAAACAAACG
S. pombe	III	2217987	2217997	-	6.74e-07	GTAAACAAACG
S. pombe	II	16342	16352	-	6.74e-07	GTAAACAAACG
S. pombe	II	470209	470219	-	6.74e-07	GTAAACAAACG
S. pombe	II	841820	841830	+	6.74e-07	GTAAACAAACG
S. pombe	II	1227588	1227598	+	6.74e-07	GTAAACAAACG
S. pombe	II	1284441	1284451	-	6.74e-07	GTAAACAAACG
S. pombe	II	1928628	1928638	-	6.74e-07	GTAAACAAACG
S. pombe	II	3347861	3347871	+	6.74e-07	GTAAACAAACG
S. pombe	II	3471163	3471173	+	6.74e-07	GTAAACAAACG
S. pombe	II	4212020	4212030	-	6.74e-07	GTAAACAAACG
S. pombe	II	4496613	4496623	+	6.74e-07	GTAAACAAACG
S. pombe	I	36129	36139	-	6.74e-07	GTAAACAAACG
S. pombe	I	173286	173296	-	6.74e-07	GTAAACAAACG
S. pombe	I	1027275	1027285	-	6.74e-07	GTAAACAAACG
S. pombe	I	1147566	1147576	+	6.74e-07	GTAAACAAACG
S. pombe	I	1498922	1498932	-	6.74e-07	GTAAACAAACG
S. pombe	I	2017446	2017456	+	6.74e-07	GTAAACAAACG
S. pombe	I	2380963	2380973	-	6.74e-07	GTAAACAAACG
S. pombe	I	2679179	2679189	+	6.74e-07	GTAAACAAACG
S. pombe	I	2861816	2861826	-	6.74e-07	GTAAACAAACG
S. pombe	I	3337600	3337610	-	6.74e-07	GTAAACAAACG
S. pombe	I	3375934	3375944	-	6.74e-07	GTAAACAAACG
S. pombe	I	3491087	3491097	-	6.74e-07	GTAAACAAACG
S. pombe	I	4157518	4157528	+	6.74e-07	GTAAACAAACG
S. pombe	I	4663320	4663330	+	6.74e-07	GTAAACAAACG
S. pombe	I	4916583	4916593	+	6.74e-07	GTAAACAAACG
S. pombe	I	5087934	5087944	+	6.74e-07	GTAAACAAACG
S. pombe	I	5517207	5517217	-	6.74e-07	GTAAACAAACG
S. pombe	III	204316	204326	+	1.12e-06	ATAAACAAACA
S. pombe	III	447073	447083	+	1.12e-06	ATAAACAAACA
S. pombe	III	761198	761208	-	1.12e-06	ATAAACAAACA
S. pombe	III	839724	839734	+	1.12e-06	ATAAACAAACA
S. pombe	III	1064401	1064411	-	1.12e-06	ATAAACAAACA
S. pombe	III	1504847	1504857	+	1.12e-06	ATAAACAAACA
S. pombe	III	1549069	1549079	+	1.12e-06	ATAAACAAACA
S. pombe	III	1625694	1625704	+	1.12e-06	ATAAACAAACA
S. pombe	III	1751765	1751775	+	1.12e-06	ATAAACAAACA
S. pombe	III	2156633	2156643	-	1.12e-06	ATAAACAAACA
S. pombe	III	2356126	2356136	-	1.12e-06	ATAAACAAACA
S. pombe	II	20025	20035	+	1.12e-06	ATAAACAAACA
S. pombe	II	201823	201833	-	1.12e-06	ATAAACAAACA
S. pombe	II	369323	369333	-	1.12e-06	ATAAACAAACA
S. pombe	II	399596	399606	-	1.12e-06	ATAAACAAACA
S. pombe	II	407977	407987	+	1.12e-06	ATAAACAAACA
S. pombe	II	550573	550583	+	1.12e-06	ATAAACAAACA
S. pombe	II	611449	611459	+	1.12e-06	ATAAACAAACA
S. pombe	II	779705	779715	-	1.12e-06	ATAAACAAACA
S. pombe	II	1158503	1158513	-	1.12e-06	ATAAACAAACA
S. pombe	II	1355729	1355739	-	1.12e-06	ATAAACAAACA
S. pombe	II	1749960	1749970	-	1.12e-06	ATAAACAAACA
S. pombe	II	1926856	1926866	+	1.12e-06	ATAAACAAACA
S. pombe	II	1954926	1954936	+	1.12e-06	ATAAACAAACA
S. pombe	II	2032575	2032585	-	1.12e-06	ATAAACAAACA
S. pombe	II	2154878	2154888	+	1.12e-06	ATAAACAAACA
S. pombe	II	2213700	2213710	+	1.12e-06	ATAAACAAACA
S. pombe	II	2662820	2662830	-	1.12e-06	ATAAACAAACA
S. pombe	II	2712129	2712139	+	1.12e-06	ATAAACAAACA
S. pombe	II	2883791	2883801	+	1.12e-06	ATAAACAAACA
S. pombe	II	2952756	2952766	-	1.12e-06	ATAAACAAACA
S. pombe	II	3104551	3104561	-	1.12e-06	ATAAACAAACA
S. pombe	II	3304608	3304618	+	1.12e-06	ATAAACAAACA
S. pombe	II	3344109	3344119	-	1.12e-06	ATAAACAAACA
S. pombe	II	3509233	3509243	+	1.12e-06	ATAAACAAACA
S. pombe	II	4064262	4064272	-	1.12e-06	ATAAACAAACA
S. pombe	II	4184977	4184987	-	1.12e-06	ATAAACAAACA
S. pombe	II	4474477	4474487	-	1.12e-06	ATAAACAAACA
S. pombe	I	142573	142583	+	1.12e-06	ATAAACAAACA
S. pombe	I	735220	735230	+	1.12e-06	ATAAACAAACA
S. pombe	I	1050792	1050802	+	1.12e-06	ATAAACAAACA
S. pombe	I	1092244	1092254	-	1.12e-06	ATAAACAAACA
S. pombe	I	1681615	1681625	+	1.12e-06	ATAAACAAACA
S. pombe	I	2177430	2177440	-	1.12e-06	ATAAACAAACA
S. pombe	I	2277828	2277838	+	1.12e-06	ATAAACAAACA
S. pombe	I	2332891	2332901	+	1.12e-06	ATAAACAAACA
S. pombe	I	2663532	2663542	-	1.12e-06	ATAAACAAACA
S. pombe	I	2882556	2882566	-	1.12e-06	ATAAACAAACA
S. pombe	I	2981890	2981900	-	1.12e-06	ATAAACAAACA
S. pombe	I	2990618	2990628	+	1.12e-06	ATAAACAAACA
S. pombe	I	3078994	3079004	+	1.12e-06	ATAAACAAACA
S. pombe	I	3098802	3098812	-	1.12e-06	ATAAACAAACA
S. pombe	I	3150648	3150658	+	1.12e-06	ATAAACAAACA
S. pombe	I	3159355	3159365	-	1.12e-06	ATAAACAAACA
S. pombe	I	3212760	3212770	+	1.12e-06	ATAAACAAACA
S. pombe	I	3478518	3478528	-	1.12e-06	ATAAACAAACA
S. pombe	I	3536033	3536043	-	1.12e-06	ATAAACAAACA
S. pombe	I	3601661	3601671	+	1.12e-06	ATAAACAAACA
S. pombe	I	3802282	3802292	+	1.12e-06	ATAAACAAACA
S. pombe	I	4078085	4078095	-	1.12e-06	ATAAACAAACA
S. pombe	I	4111321	4111331	-	1.12e-06	ATAAACAAACA
S. pombe	I	4414938	4414948	+	1.12e-06	ATAAACAAACA
S. pombe	I	4514186	4514196	-	1.12e-06	ATAAACAAACA
S. pombe	I	4622709	4622719	+	1.12e-06	ATAAACAAACA
S. pombe	I	4757189	4757199	+	1.12e-06	ATAAACAAACA
S. pombe	I	4863930	4863940	-	1.12e-06	ATAAACAAACA
S. pombe	I	4958798	4958808	-	1.12e-06	ATAAACAAACA
S. pombe	I	4993831	4993841	-	1.12e-06	ATAAACAAACA
S. pombe	I	5300560	5300570	-	1.12e-06	ATAAACAAACA
S. pombe	III	32351	32361	+	1.49e-06	GTAAACAAAGA
S. pombe	III	318953	318963	-	1.49e-06	GTAAACAAAGA
S. pombe	III	565197	565207	-	1.49e-06	GTAAACAAAGA
S. pombe	III	565317	565327	-	1.49e-06	GTAAACAAAGA
S. pombe	III	809074	809084	-	1.49e-06	GTAAACAAAGA
S. pombe	III	1214362	1214372	-	1.49e-06	GTAAACAAAGA
S. pombe	III	1559591	1559601	-	1.49e-06	GTAAACAAAGA
S. pombe	III	1753880	1753890	-	1.49e-06	GTAAACAAAGA
S. pombe	III	1765903	1765913	-	1.49e-06	GTAAACAAAGA
S. pombe	III	2151009	2151019	-	1.49e-06	GTAAACAAAGA
S. pombe	II	197577	197587	-	1.49e-06	GTAAACAAAGA
S. pombe	II	1423958	1423968	+	1.49e-06	GTAAACAAAGA
S. pombe	II	1620110	1620120	+	1.49e-06	GTAAACAAAGA
S. pombe	II	1628295	1628305	-	1.49e-06	GTAAACAAAGA
S. pombe	II	1679647	1679657	-	1.49e-06	GTAAACAAAGA
S. pombe	II	1685442	1685452	-	1.49e-06	GTAAACAAAGA
S. pombe	II	1746213	1746223	-	1.49e-06	GTAAACAAAGA
S. pombe	II	1970344	1970354	+	1.49e-06	GTAAACAAAGA
S. pombe	II	2259105	2259115	+	1.49e-06	GTAAACAAAGA
S. pombe	II	2307385	2307395	-	1.49e-06	GTAAACAAAGA
S. pombe	II	2335614	2335624	-	1.49e-06	GTAAACAAAGA
S. pombe	II	2976586	2976596	+	1.49e-06	GTAAACAAAGA
S. pombe	II	3094925	3094935	-	1.49e-06	GTAAACAAAGA
S. pombe	II	3575713	3575723	+	1.49e-06	GTAAACAAAGA
S. pombe	II	3899969	3899979	+	1.49e-06	GTAAACAAAGA
S. pombe	II	3933340	3933350	+	1.49e-06	GTAAACAAAGA
S. pombe	II	4048303	4048313	+	1.49e-06	GTAAACAAAGA
S. pombe	II	4268677	4268687	+	1.49e-06	GTAAACAAAGA
S. pombe	I	230087	230097	-	1.49e-06	GTAAACAAAGA
S. pombe	I	254162	254172	-	1.49e-06	GTAAACAAAGA
S. pombe	I	384421	384431	+	1.49e-06	GTAAACAAAGA
S. pombe	I	427457	427467	+	1.49e-06	GTAAACAAAGA
S. pombe	I	823199	823209	+	1.49e-06	GTAAACAAAGA
S. pombe	I	992131	992141	-	1.49e-06	GTAAACAAAGA
S. pombe	I	1048840	1048850	-	1.49e-06	GTAAACAAAGA
S. pombe	I	1823793	1823803	+	1.49e-06	GTAAACAAAGA
S. pombe	I	2089131	2089141	-	1.49e-06	GTAAACAAAGA
S. pombe	I	2467518	2467528	+	1.49e-06	GTAAACAAAGA
S. pombe	I	3001698	3001708	+	1.49e-06	GTAAACAAAGA
S. pombe	I	3030893	3030903	-	1.49e-06	GTAAACAAAGA
S. pombe	I	3049514	3049524	-	1.49e-06	GTAAACAAAGA
S. pombe	I	3183581	3183591	-	1.49e-06	GTAAACAAAGA
S. pombe	I	3529031	3529041	+	1.49e-06	GTAAACAAAGA
S. pombe	I	3548325	3548335	+	1.49e-06	GTAAACAAAGA
S. pombe	I	3878406	3878416	-	1.49e-06	GTAAACAAAGA
S. pombe	I	4014479	4014489	+	1.49e-06	GTAAACAAAGA
S. pombe	I	4153516	4153526	+	1.49e-06	GTAAACAAAGA
S. pombe	I	4274921	4274931	-	1.49e-06	GTAAACAAAGA
S. pombe	I	4514980	4514990	-	1.49e-06	GTAAACAAAGA
S. pombe	I	4634880	4634890	-	1.49e-06	GTAAACAAAGA
S. pombe	I	4750874	4750884	+	1.49e-06	GTAAACAAAGA
S. pombe	I	4783121	4783131	+	1.49e-06	GTAAACAAAGA
S. pombe	I	5273876	5273886	+	1.49e-06	GTAAACAAAGA
S. pombe	III	42795	42805	+	1.8e-06	GTAAACAAACC
S. pombe	III	378058	378068	+	1.8e-06	GTAAACAAACC
S. pombe	III	916021	916031	+	1.8e-06	GTAAACAAACC
S. pombe	III	1226994	1227004	+	1.8e-06	GTAAACAAACC
S. pombe	III	1670649	1670659	-	1.8e-06	GTAAACAAACC
S. pombe	III	1870413	1870423	-	1.8e-06	GTAAACAAACC
S. pombe	III	2418971	2418981	-	1.8e-06	GTAAACAAACC
S. pombe	II	390871	390881	+	1.8e-06	GTAAACAAACC
S. pombe	II	497978	497988	+	1.8e-06	GTAAACAAACC
S. pombe	II	1174822	1174832	+	1.8e-06	GTAAACAAACC
S. pombe	II	2435318	2435328	+	1.8e-06	GTAAACAAACC
S. pombe	II	2625755	2625765	+	1.8e-06	GTAAACAAACC
S. pombe	II	968816	968826	-	1.8e-06	GTAAACAAACC
S. pombe	II	1150319	1150329	-	1.8e-06	GTAAACAAACC
S. pombe	II	1406229	1406239	-	1.8e-06	GTAAACAAACC
S. pombe	II	1458940	1458950	-	1.8e-06	GTAAACAAACC
S. pombe	II	1905691	1905701	-	1.8e-06	GTAAACAAACC
S. pombe	II	3152999	3153009	-	1.8e-06	GTAAACAAACC
S. pombe	I	489949	489959	+	1.8e-06	GTAAACAAACC
S. pombe	I	705490	705500	+	1.8e-06	GTAAACAAACC
S. pombe	I	894831	894841	+	1.8e-06	GTAAACAAACC
S. pombe	I	1403952	1403962	+	1.8e-06	GTAAACAAACC
S. pombe	I	1807808	1807818	+	1.8e-06	GTAAACAAACC
S. pombe	I	1889887	1889897	+	1.8e-06	GTAAACAAACC
S. pombe	I	2259749	2259759	+	1.8e-06	GTAAACAAACC
S. pombe	I	2313528	2313538	+	1.8e-06	GTAAACAAACC
S. pombe	I	2419996	2420006	+	1.8e-06	GTAAACAAACC
S. pombe	I	2538321	2538331	+	1.8e-06	GTAAACAAACC
S. pombe	I	2710774	2710784	+	1.8e-06	GTAAACAAACC
S. pombe	I	2990994	2991004	+	1.8e-06	GTAAACAAACC
S. pombe	I	3300127	3300137	+	1.8e-06	GTAAACAAACC
S. pombe	I	3326202	3326212	+	1.8e-06	GTAAACAAACC
S. pombe	I	4457780	4457790	+	1.8e-06	GTAAACAAACC
S. pombe	I	4990984	4990994	+	1.8e-06	GTAAACAAACC
S. pombe	I	4997260	4997270	+	1.8e-06	GTAAACAAACC
S. pombe	I	237431	237441	-	1.8e-06	GTAAACAAACC
S. pombe	I	1424319	1424329	-	1.8e-06	GTAAACAAACC
S. pombe	I	1795095	1795105	-	1.8e-06	GTAAACAAACC
S. pombe	I	2319622	2319632	-	1.8e-06	GTAAACAAACC
S. pombe	I	2343498	2343508	-	1.8e-06	GTAAACAAACC
S. pombe	I	2508673	2508683	-	1.8e-06	GTAAACAAACC
S. pombe	I	5318665	5318675	-	1.8e-06	GTAAACAAACC
S. pombe	III	72811	72821	+	2.25e-06	GTAAACAAATA
S. pombe	III	176562	176572	-	2.25e-06	GTAAACAAATA
S. pombe	III	333638	333648	-	2.25e-06	GTAAACAAATA
S. pombe	III	1033643	1033653	+	2.25e-06	GTAAACAAATA
S. pombe	III	1372856	1372866	+	2.25e-06	GTAAACAAATA
S. pombe	III	1485962	1485972	+	2.25e-06	GTAAACAAATA
S. pombe	III	1848062	1848072	-	2.25e-06	GTAAACAAATA
S. pombe	III	1869699	1869709	-	2.25e-06	GTAAACAAATA
S. pombe	III	2063114	2063124	-	2.25e-06	GTAAACAAATA
S. pombe	III	2277445	2277455	+	2.25e-06	GTAAACAAATA
S. pombe	III	2300324	2300334	+	2.25e-06	GTAAACAAATA
S. pombe	III	2396544	2396554	-	2.25e-06	GTAAACAAATA
S. pombe	II	604638	604648	-	2.25e-06	GTAAACAAATA
S. pombe	II	661745	661755	-	2.25e-06	GTAAACAAATA
S. pombe	II	1012770	1012780	-	2.25e-06	GTAAACAAATA
S. pombe	II	1021533	1021543	-	2.25e-06	GTAAACAAATA
S. pombe	II	1080452	1080462	-	2.25e-06	GTAAACAAATA
S. pombe	II	1868368	1868378	-	2.25e-06	GTAAACAAATA
S. pombe	II	1893983	1893993	+	2.25e-06	GTAAACAAATA
S. pombe	II	2093102	2093112	+	2.25e-06	GTAAACAAATA
S. pombe	II	2349557	2349567	+	2.25e-06	GTAAACAAATA
S. pombe	II	2431857	2431867	-	2.25e-06	GTAAACAAATA
S. pombe	II	2555760	2555770	-	2.25e-06	GTAAACAAATA
S. pombe	II	2672989	2672999	-	2.25e-06	GTAAACAAATA
S. pombe	II	3032409	3032419	+	2.25e-06	GTAAACAAATA
S. pombe	II	3047999	3048009	+	2.25e-06	GTAAACAAATA
S. pombe	II	3130126	3130136	-	2.25e-06	GTAAACAAATA
S. pombe	II	3230364	3230374	+	2.25e-06	GTAAACAAATA
S. pombe	II	3357662	3357672	+	2.25e-06	GTAAACAAATA
S. pombe	II	3405171	3405181	+	2.25e-06	GTAAACAAATA
S. pombe	II	3685747	3685757	-	2.25e-06	GTAAACAAATA
S. pombe	II	3989659	3989669	-	2.25e-06	GTAAACAAATA
S. pombe	II	4206063	4206073	+	2.25e-06	GTAAACAAATA
S. pombe	II	4274813	4274823	-	2.25e-06	GTAAACAAATA
S. pombe	I	63149	63159	-	2.25e-06	GTAAACAAATA
S. pombe	I	87282	87292	-	2.25e-06	GTAAACAAATA
S. pombe	I	218159	218169	+	2.25e-06	GTAAACAAATA
S. pombe	I	460097	460107	-	2.25e-06	GTAAACAAATA
S. pombe	I	482783	482793	-	2.25e-06	GTAAACAAATA
S. pombe	I	612154	612164	-	2.25e-06	GTAAACAAATA
S. pombe	I	948229	948239	-	2.25e-06	GTAAACAAATA
S. pombe	I	994885	994895	+	2.25e-06	GTAAACAAATA
S. pombe	I	1090233	1090243	-	2.25e-06	GTAAACAAATA
S. pombe	I	1197937	1197947	+	2.25e-06	GTAAACAAATA
S. pombe	I	1255267	1255277	-	2.25e-06	GTAAACAAATA
S. pombe	I	1956584	1956594	-	2.25e-06	GTAAACAAATA
S. pombe	I	2024052	2024062	-	2.25e-06	GTAAACAAATA
S. pombe	I	2274354	2274364	-	2.25e-06	GTAAACAAATA
S. pombe	I	2397020	2397030	+	2.25e-06	GTAAACAAATA
S. pombe	I	2418291	2418301	+	2.25e-06	GTAAACAAATA
S. pombe	I	2489183	2489193	-	2.25e-06	GTAAACAAATA
S. pombe	I	2761457	2761467	-	2.25e-06	GTAAACAAATA
S. pombe	I	2886807	2886817	+	2.25e-06	GTAAACAAATA
S. pombe	I	3053126	3053136	+	2.25e-06	GTAAACAAATA
S. pombe	I	3241261	3241271	+	2.25e-06	GTAAACAAATA
S. pombe	I	3248301	3248311	-	2.25e-06	GTAAACAAATA
S. pombe	I	3673192	3673202	-	2.25e-06	GTAAACAAATA
S. pombe	I	3687578	3687588	+	2.25e-06	GTAAACAAATA
S. pombe	I	3891885	3891895	+	2.25e-06	GTAAACAAATA
S. pombe	I	3961552	3961562	+	2.25e-06	GTAAACAAATA
S. pombe	I	4087885	4087895	-	2.25e-06	GTAAACAAATA
S. pombe	I	4089822	4089832	-	2.25e-06	GTAAACAAATA
S. pombe	I	4154000	4154010	+	2.25e-06	GTAAACAAATA
S. pombe	I	4184547	4184557	-	2.25e-06	GTAAACAAATA
S. pombe	I	4257206	4257216	-	2.25e-06	GTAAACAAATA
S. pombe	I	4292321	4292331	-	2.25e-06	GTAAACAAATA
S. pombe	I	4360218	4360228	+	2.25e-06	GTAAACAAATA
S. pombe	I	4375087	4375097	-	2.25e-06	GTAAACAAATA
S. pombe	I	4442836	4442846	+	2.25e-06	GTAAACAAATA
S. pombe	I	4486824	4486834	-	2.25e-06	GTAAACAAATA
S. pombe	I	4549501	4549511	+	2.25e-06	GTAAACAAATA
S. pombe	I	4549656	4549666	-	2.25e-06	GTAAACAAATA
S. pombe	I	4604391	4604401	-	2.25e-06	GTAAACAAATA
S. pombe	I	4652412	4652422	+	2.25e-06	GTAAACAAATA
S. pombe	I	4881185	4881195	-	2.25e-06	GTAAACAAATA
S. pombe	I	4997184	4997194	+	2.25e-06	GTAAACAAATA
S. pombe	I	5078415	5078425	-	2.25e-06	GTAAACAAATA
S. pombe	I	5157517	5157527	-	2.25e-06	GTAAACAAATA
S. pombe	I	5319680	5319690	-	2.25e-06	GTAAACAAATA
S. pombe	III	141345	141355	+	2.62e-06	GAAAACAAACA
S. pombe	III	360677	360687	-	2.62e-06	GAAAACAAACA
S. pombe	III	421651	421661	-	2.62e-06	GAAAACAAACA
S. pombe	III	443264	443274	+	2.62e-06	GAAAACAAACA
S. pombe	III	580444	580454	-	2.62e-06	GAAAACAAACA
S. pombe	III	819684	819694	+	2.62e-06	GAAAACAAACA
S. pombe	III	1008225	1008235	+	2.62e-06	GAAAACAAACA
S. pombe	III	1642366	1642376	-	2.62e-06	GAAAACAAACA
S. pombe	III	1701688	1701698	+	2.62e-06	GAAAACAAACA
S. pombe	III	1864918	1864928	+	2.62e-06	GAAAACAAACA
S. pombe	III	2189506	2189516	-	2.62e-06	GAAAACAAACA
S. pombe	III	2246969	2246979	+	2.62e-06	GAAAACAAACA
S. pombe	III	2256373	2256383	+	2.62e-06	GAAAACAAACA
S. pombe	III	2357728	2357738	-	2.62e-06	GAAAACAAACA
S. pombe	II	406736	406746	-	2.62e-06	GAAAACAAACA
S. pombe	II	874291	874301	+	2.62e-06	GAAAACAAACA
S. pombe	II	1094375	1094385	+	2.62e-06	GAAAACAAACA
S. pombe	II	2089677	2089687	+	2.62e-06	GAAAACAAACA
S. pombe	II	2486227	2486237	+	2.62e-06	GAAAACAAACA
S. pombe	II	2886777	2886787	+	2.62e-06	GAAAACAAACA
S. pombe	II	2961373	2961383	-	2.62e-06	GAAAACAAACA
S. pombe	II	3015028	3015038	+	2.62e-06	GAAAACAAACA
S. pombe	II	4387772	4387782	-	2.62e-06	GAAAACAAACA
S. pombe	II	4485320	4485330	+	2.62e-06	GAAAACAAACA
S. pombe	I	114909	114919	+	2.62e-06	GAAAACAAACA
S. pombe	I	181637	181647	+	2.62e-06	GAAAACAAACA
S. pombe	I	239176	239186	+	2.62e-06	GAAAACAAACA
S. pombe	I	310494	310504	-	2.62e-06	GAAAACAAACA
S. pombe	I	555070	555080	+	2.62e-06	GAAAACAAACA
S. pombe	I	642522	642532	-	2.62e-06	GAAAACAAACA
S. pombe	I	760593	760603	-	2.62e-06	GAAAACAAACA
S. pombe	I	997847	997857	+	2.62e-06	GAAAACAAACA
S. pombe	I	1175973	1175983	+	2.62e-06	GAAAACAAACA
S. pombe	I	1379435	1379445	-	2.62e-06	GAAAACAAACA
S. pombe	I	1451847	1451857	-	2.62e-06	GAAAACAAACA
S. pombe	I	1507553	1507563	+	2.62e-06	GAAAACAAACA
S. pombe	I	1508422	1508432	+	2.62e-06	GAAAACAAACA
S. pombe	I	2257080	2257090	+	2.62e-06	GAAAACAAACA
S. pombe	I	2705395	2705405	-	2.62e-06	GAAAACAAACA
S. pombe	I	3043197	3043207	-	2.62e-06	GAAAACAAACA
S. pombe	I	3059291	3059301	+	2.62e-06	GAAAACAAACA
S. pombe	I	3299883	3299893	+	2.62e-06	GAAAACAAACA
S. pombe	I	3642707	3642717	-	2.62e-06	GAAAACAAACA
S. pombe	I	4701470	4701480	+	2.62e-06	GAAAACAAACA
S. pombe	I	4844104	4844114	-	2.62e-06	GAAAACAAACA
S. pombe	I	5256949	5256959	+	2.62e-06	GAAAACAAACA
S. pombe	III	299991	300001	+	2.99e-06	GTAAACAATCA
S. pombe	III	396431	396441	-	2.99e-06	GTAAACAATCA
S. pombe	III	437283	437293	-	2.99e-06	GTAAACAATCA
S. pombe	III	1609612	1609622	+	2.99e-06	GTAAACAATCA
S. pombe	III	1875795	1875805	+	2.99e-06	GTAAACAATCA
S. pombe	III	2332208	2332218	+	2.99e-06	GTAAACAATCA
S. pombe	II	954456	954466	+	2.99e-06	GTAAACAATCA
S. pombe	II	1312121	1312131	-	2.99e-06	GTAAACAATCA
S. pombe	II	1349495	1349505	+	2.99e-06	GTAAACAATCA
S. pombe	II	1423513	1423523	-	2.99e-06	GTAAACAATCA
S. pombe	II	2811942	2811952	-	2.99e-06	GTAAACAATCA
S. pombe	II	2906605	2906615	-	2.99e-06	GTAAACAATCA
S. pombe	II	3538429	3538439	+	2.99e-06	GTAAACAATCA
S. pombe	II	4066281	4066291	-	2.99e-06	GTAAACAATCA
S. pombe	II	4242884	4242894	-	2.99e-06	GTAAACAATCA
S. pombe	II	4475656	4475666	+	2.99e-06	GTAAACAATCA
S. pombe	I	294270	294280	-	2.99e-06	GTAAACAATCA
S. pombe	I	296573	296583	+	2.99e-06	GTAAACAATCA
S. pombe	I	314243	314253	-	2.99e-06	GTAAACAATCA
S. pombe	I	406479	406489	+	2.99e-06	GTAAACAATCA
S. pombe	I	804463	804473	-	2.99e-06	GTAAACAATCA
S. pombe	I	902582	902592	-	2.99e-06	GTAAACAATCA
S. pombe	I	1503635	1503645	+	2.99e-06	GTAAACAATCA
S. pombe	I	1648191	1648201	+	2.99e-06	GTAAACAATCA
S. pombe	I	2012381	2012391	-	2.99e-06	GTAAACAATCA
S. pombe	I	2216074	2216084	+	2.99e-06	GTAAACAATCA
S. pombe	I	2640073	2640083	-	2.99e-06	GTAAACAATCA
S. pombe	I	3330779	3330789	-	2.99e-06	GTAAACAATCA
S. pombe	I	3644864	3644874	+	2.99e-06	GTAAACAATCA
S. pombe	I	4010548	4010558	+	2.99e-06	GTAAACAATCA
S. pombe	I	4559670	4559680	+	2.99e-06	GTAAACAATCA
S. pombe	I	5256989	5256999	+	2.99e-06	GTAAACAATCA
S. pombe	I	5532059	5532069	-	2.99e-06	GTAAACAATCA
S. octosporus	oct_chrI	29362	29372	+	3.7e-07	GTAAACAAACA
S. octosporus	oct_chrI	75686	75696	-	3.7e-07	GTAAACAAACA
S. octosporus	oct_chrI	133302	133312	+	3.7e-07	GTAAACAAACA
S. octosporus	oct_chrI	376828	376838	-	3.7e-07	GTAAACAAACA
S. octosporus	oct_chrI	406550	406560	+	3.7e-07	GTAAACAAACA
S. octosporus	oct_chrI	418465	418475	-	3.7e-07	GTAAACAAACA
S. octosporus	oct_chrI	420578	420588	-	3.7e-07	GTAAACAAACA
S. octosporus	oct_chrI	432007	432017	+	3.7e-07	GTAAACAAACA
S. octosporus	oct_chrI	444886	444896	+	3.7e-07	GTAAACAAACA
S. octosporus	oct_chrI	503400	503410	+	3.7e-07	GTAAACAAACA
S. octosporus	oct_chrI	559353	559363	-	3.7e-07	GTAAACAAACA
S. octosporus	oct_chrI	617569	617579	-	3.7e-07	GTAAACAAACA
S. octosporus	oct_chrI	656942	656952	+	3.7e-07	GTAAACAAACA
S. octosporus	oct_chrI	712914	712924	-	3.7e-07	GTAAACAAACA
S. octosporus	oct_chrI	787847	787857	-	3.7e-07	GTAAACAAACA
S. octosporus	oct_chrI	799704	799714	+	3.7e-07	GTAAACAAACA
S. octosporus	oct_chrI	916755	916765	-	3.7e-07	GTAAACAAACA
S. octosporus	oct_chrI	920806	920816	-	3.7e-07	GTAAACAAACA
S. octosporus	oct_chrI	1025136	1025146	-	3.7e-07	GTAAACAAACA
S. octosporus	oct_chrI	1145827	1145837	+	3.7e-07	GTAAACAAACA
S. octosporus	oct_chrI	1182912	1182922	+	3.7e-07	GTAAACAAACA
S. octosporus	oct_chrI	1212280	1212290	-	3.7e-07	GTAAACAAACA
S. octosporus	oct_chrI	1220845	1220855	+	3.7e-07	GTAAACAAACA
S. octosporus	oct_chrI	1271576	1271586	-	3.7e-07	GTAAACAAACA
S. octosporus	oct_chrI	1282304	1282314	+	3.7e-07	GTAAACAAACA
S. octosporus	oct_chrI	1290723	1290733	+	3.7e-07	GTAAACAAACA
S. octosporus	oct_chrI	1426108	1426118	-	3.7e-07	GTAAACAAACA
S. octosporus	oct_chrI	1426119	1426129	-	3.7e-07	GTAAACAAACA
S. octosporus	oct_chrI	1442810	1442820	-	3.7e-07	GTAAACAAACA
S. octosporus	oct_chrI	1535454	1535464	+	3.7e-07	GTAAACAAACA
S. octosporus	oct_chrI	1538238	1538248	+	3.7e-07	GTAAACAAACA
S. octosporus	oct_chrI	1549793	1549803	-	3.7e-07	GTAAACAAACA
S. octosporus	oct_chrI	1598892	1598902	-	3.7e-07	GTAAACAAACA
S. octosporus	oct_chrI	1600565	1600575	+	3.7e-07	GTAAACAAACA
S. octosporus	oct_chrI	1634194	1634204	+	3.7e-07	GTAAACAAACA
S. octosporus	oct_chrI	1650413	1650423	-	3.7e-07	GTAAACAAACA
S. octosporus	oct_chrI	1669079	1669089	+	3.7e-07	GTAAACAAACA
S. octosporus	oct_chrI	1702253	1702263	-	3.7e-07	GTAAACAAACA
S. octosporus	oct_chrI	1789198	1789208	-	3.7e-07	GTAAACAAACA
S. octosporus	oct_chrI	1796801	1796811	-	3.7e-07	GTAAACAAACA
S. octosporus	oct_chrI	1836814	1836824	-	3.7e-07	GTAAACAAACA
S. octosporus	oct_chrI	1859425	1859435	-	3.7e-07	GTAAACAAACA
S. octosporus	oct_chrI	1952675	1952685	-	3.7e-07	GTAAACAAACA
S. octosporus	oct_chrI	1963831	1963841	-	3.7e-07	GTAAACAAACA
S. octosporus	oct_chrI	1975918	1975928	+	3.7e-07	GTAAACAAACA
S. octosporus	oct_chrI	2055467	2055477	-	3.7e-07	GTAAACAAACA
S. octosporus	oct_chrI	2098477	2098487	+	3.7e-07	GTAAACAAACA
S. octosporus	oct_chrI	2161619	2161629	-	3.7e-07	GTAAACAAACA
S. octosporus	oct_chrI	2181037	2181047	+	3.7e-07	GTAAACAAACA
S. octosporus	oct_chrI	2181967	2181977	+	3.7e-07	GTAAACAAACA
S. octosporus	oct_chrI	2216519	2216529	+	3.7e-07	GTAAACAAACA
S. octosporus	oct_chrI	2285937	2285947	+	3.7e-07	GTAAACAAACA
S. octosporus	oct_chrI	2367252	2367262	-	3.7e-07	GTAAACAAACA
S. octosporus	oct_chrI	2400147	2400157	+	3.7e-07	GTAAACAAACA
S. octosporus	oct_chrI	2410100	2410110	-	3.7e-07	GTAAACAAACA
S. octosporus	oct_chrI	2440231	2440241	-	3.7e-07	GTAAACAAACA
S. octosporus	oct_chrI	2609443	2609453	+	3.7e-07	GTAAACAAACA
S. octosporus	oct_chrI	2671084	2671094	-	3.7e-07	GTAAACAAACA
S. octosporus	oct_chrI	2709204	2709214	-	3.7e-07	GTAAACAAACA
S. octosporus	oct_chrI	2711703	2711713	+	3.7e-07	GTAAACAAACA
S. octosporus	oct_chrI	2720826	2720836	+	3.7e-07	GTAAACAAACA
S. octosporus	oct_chrI	2932057	2932067	+	3.7e-07	GTAAACAAACA
S. octosporus	oct_chrI	2950225	2950235	-	3.7e-07	GTAAACAAACA
S. octosporus	oct_chrI	3044500	3044510	-	3.7e-07	GTAAACAAACA
S. octosporus	oct_chrI	3073950	3073960	+	3.7e-07	GTAAACAAACA
S. octosporus	oct_chrI	3130767	3130777	+	3.7e-07	GTAAACAAACA
S. octosporus	oct_chrI	3164306	3164316	-	3.7e-07	GTAAACAAACA
S. octosporus	oct_chrI	3234696	3234706	-	3.7e-07	GTAAACAAACA
S. octosporus	oct_chrI	3259886	3259896	+	3.7e-07	GTAAACAAACA
S. octosporus	oct_chrI	3458089	3458099	-	3.7e-07	GTAAACAAACA
S. octosporus	oct_chrI	3459181	3459191	-	3.7e-07	GTAAACAAACA
S. octosporus	oct_chrI	3541759	3541769	-	3.7e-07	GTAAACAAACA
S. octosporus	oct_chrI	3616651	3616661	-	3.7e-07	GTAAACAAACA
S. octosporus	oct_chrI	3630396	3630406	+	3.7e-07	GTAAACAAACA
S. octosporus	oct_chrI	3908811	3908821	+	3.7e-07	GTAAACAAACA
S. octosporus	oct_chrI	3917624	3917634	-	3.7e-07	GTAAACAAACA
S. octosporus	oct_chrI	4161823	4161833	-	3.7e-07	GTAAACAAACA
S. octosporus	oct_chrI	4187799	4187809	+	3.7e-07	GTAAACAAACA
S. octosporus	oct_chrI	4230516	4230526	+	3.7e-07	GTAAACAAACA
S. octosporus	oct_chrI	4271307	4271317	+	3.7e-07	GTAAACAAACA
S. octosporus	oct_chrI	4286291	4286301	-	3.7e-07	GTAAACAAACA
S. octosporus	oct_chrI	4436446	4436456	-	3.7e-07	GTAAACAAACA
S. octosporus	oct_chrI	4452375	4452385	-	3.7e-07	GTAAACAAACA
S. octosporus	oct_chrI	72569	72579	-	6.74e-07	GTAAACAAACG
S. octosporus	oct_chrI	214727	214737	+	6.74e-07	GTAAACAAACG
S. octosporus	oct_chrI	231937	231947	-	6.74e-07	GTAAACAAACG
S. octosporus	oct_chrI	645520	645530	+	6.74e-07	GTAAACAAACG
S. octosporus	oct_chrI	681858	681868	-	6.74e-07	GTAAACAAACG
S. octosporus	oct_chrI	938852	938862	-	6.74e-07	GTAAACAAACG
S. octosporus	oct_chrI	1146214	1146224	+	6.74e-07	GTAAACAAACG
S. octosporus	oct_chrI	1212427	1212437	+	6.74e-07	GTAAACAAACG
S. octosporus	oct_chrI	1369272	1369282	+	6.74e-07	GTAAACAAACG
S. octosporus	oct_chrI	1409323	1409333	-	6.74e-07	GTAAACAAACG
S. octosporus	oct_chrI	2202288	2202298	-	6.74e-07	GTAAACAAACG
S. octosporus	oct_chrI	2674554	2674564	+	6.74e-07	GTAAACAAACG
S. octosporus	oct_chrI	2918924	2918934	+	6.74e-07	GTAAACAAACG
S. octosporus	oct_chrI	3036175	3036185	+	6.74e-07	GTAAACAAACG
S. octosporus	oct_chrI	3202246	3202256	+	6.74e-07	GTAAACAAACG
S. octosporus	oct_chrI	3841919	3841929	+	6.74e-07	GTAAACAAACG
S. octosporus	oct_chrI	4020930	4020940	+	6.74e-07	GTAAACAAACG
S. octosporus	oct_chrI	4102431	4102441	-	6.74e-07	GTAAACAAACG
S. octosporus	oct_chrI	41079	41089	+	1.12e-06	ATAAACAAACA
S. octosporus	oct_chrI	77694	77704	+	1.12e-06	ATAAACAAACA
S. octosporus	oct_chrI	157971	157981	-	1.12e-06	ATAAACAAACA
S. octosporus	oct_chrI	222743	222753	-	1.12e-06	ATAAACAAACA
S. octosporus	oct_chrI	656859	656869	+	1.12e-06	ATAAACAAACA
S. octosporus	oct_chrI	755146	755156	-	1.12e-06	ATAAACAAACA
S. octosporus	oct_chrI	772585	772595	-	1.12e-06	ATAAACAAACA
S. octosporus	oct_chrI	791194	791204	+	1.12e-06	ATAAACAAACA
S. octosporus	oct_chrI	859798	859808	+	1.12e-06	ATAAACAAACA
S. octosporus	oct_chrI	859854	859864	+	1.12e-06	ATAAACAAACA
S. octosporus	oct_chrI	1007776	1007786	+	1.12e-06	ATAAACAAACA
S. octosporus	oct_chrI	1079812	1079822	-	1.12e-06	ATAAACAAACA
S. octosporus	oct_chrI	1170764	1170774	+	1.12e-06	ATAAACAAACA
S. octosporus	oct_chrI	1266478	1266488	-	1.12e-06	ATAAACAAACA
S. octosporus	oct_chrI	1305793	1305803	-	1.12e-06	ATAAACAAACA
S. octosporus	oct_chrI	1411574	1411584	+	1.12e-06	ATAAACAAACA
S. octosporus	oct_chrI	1528578	1528588	+	1.12e-06	ATAAACAAACA
S. octosporus	oct_chrI	1635415	1635425	+	1.12e-06	ATAAACAAACA
S. octosporus	oct_chrI	1704879	1704889	-	1.12e-06	ATAAACAAACA
S. octosporus	oct_chrI	1803139	1803149	+	1.12e-06	ATAAACAAACA
S. octosporus	oct_chrI	2156175	2156185	-	1.12e-06	ATAAACAAACA
S. octosporus	oct_chrI	2163553	2163563	-	1.12e-06	ATAAACAAACA
S. octosporus	oct_chrI	2420445	2420455	-	1.12e-06	ATAAACAAACA
S. octosporus	oct_chrI	2478034	2478044	+	1.12e-06	ATAAACAAACA
S. octosporus	oct_chrI	2607523	2607533	+	1.12e-06	ATAAACAAACA
S. octosporus	oct_chrI	2609516	2609526	+	1.12e-06	ATAAACAAACA
S. octosporus	oct_chrI	2861629	2861639	-	1.12e-06	ATAAACAAACA
S. octosporus	oct_chrI	2891959	2891969	-	1.12e-06	ATAAACAAACA
S. octosporus	oct_chrI	3223326	3223336	+	1.12e-06	ATAAACAAACA
S. octosporus	oct_chrI	3236130	3236140	-	1.12e-06	ATAAACAAACA
S. octosporus	oct_chrI	3384385	3384395	+	1.12e-06	ATAAACAAACA
S. octosporus	oct_chrI	3723911	3723921	+	1.12e-06	ATAAACAAACA
S. octosporus	oct_chrI	3822776	3822786	-	1.12e-06	ATAAACAAACA
S. octosporus	oct_chrI	3872691	3872701	-	1.12e-06	ATAAACAAACA
S. octosporus	oct_chrI	3882699	3882709	-	1.12e-06	ATAAACAAACA
S. octosporus	oct_chrI	3941062	3941072	-	1.12e-06	ATAAACAAACA
S. octosporus	oct_chrI	4247248	4247258	-	1.12e-06	ATAAACAAACA
S. octosporus	oct_chrI	4370891	4370901	-	1.12e-06	ATAAACAAACA
S. octosporus	oct_chrI	4377478	4377488	-	1.12e-06	ATAAACAAACA
S. octosporus	oct_chrI	4377514	4377524	-	1.12e-06	ATAAACAAACA
S. octosporus	oct_chrI	284329	284339	-	1.49e-06	GTAAACAAAGA
S. octosporus	oct_chrI	405981	405991	+	1.49e-06	GTAAACAAAGA
S. octosporus	oct_chrI	712575	712585	-	1.49e-06	GTAAACAAAGA
S. octosporus	oct_chrI	878767	878777	+	1.49e-06	GTAAACAAAGA
S. octosporus	oct_chrI	1058611	1058621	+	1.49e-06	GTAAACAAAGA
S. octosporus	oct_chrI	1080373	1080383	-	1.49e-06	GTAAACAAAGA
S. octosporus	oct_chrI	1463464	1463474	+	1.49e-06	GTAAACAAAGA
S. octosporus	oct_chrI	1655281	1655291	-	1.49e-06	GTAAACAAAGA
S. octosporus	oct_chrI	1964046	1964056	+	1.49e-06	GTAAACAAAGA
S. octosporus	oct_chrI	1973519	1973529	+	1.49e-06	GTAAACAAAGA
S. octosporus	oct_chrI	2028920	2028930	-	1.49e-06	GTAAACAAAGA
S. octosporus	oct_chrI	2030014	2030024	+	1.49e-06	GTAAACAAAGA
S. octosporus	oct_chrI	2081042	2081052	+	1.49e-06	GTAAACAAAGA
S. octosporus	oct_chrI	2087003	2087013	-	1.49e-06	GTAAACAAAGA
S. octosporus	oct_chrI	2094247	2094257	-	1.49e-06	GTAAACAAAGA
S. octosporus	oct_chrI	2103979	2103989	+	1.49e-06	GTAAACAAAGA
S. octosporus	oct_chrI	2140336	2140346	-	1.49e-06	GTAAACAAAGA
S. octosporus	oct_chrI	2379865	2379875	+	1.49e-06	GTAAACAAAGA
S. octosporus	oct_chrI	2410081	2410091	-	1.49e-06	GTAAACAAAGA
S. octosporus	oct_chrI	2489454	2489464	+	1.49e-06	GTAAACAAAGA
S. octosporus	oct_chrI	2747847	2747857	+	1.49e-06	GTAAACAAAGA
S. octosporus	oct_chrI	2831552	2831562	-	1.49e-06	GTAAACAAAGA
S. octosporus	oct_chrI	2844206	2844216	-	1.49e-06	GTAAACAAAGA
S. octosporus	oct_chrI	2966502	2966512	-	1.49e-06	GTAAACAAAGA
S. octosporus	oct_chrI	3084287	3084297	-	1.49e-06	GTAAACAAAGA
S. octosporus	oct_chrI	3172009	3172019	+	1.49e-06	GTAAACAAAGA
S. octosporus	oct_chrI	3177462	3177472	+	1.49e-06	GTAAACAAAGA
S. octosporus	oct_chrI	3355117	3355127	-	1.49e-06	GTAAACAAAGA
S. octosporus	oct_chrI	3458659	3458669	-	1.49e-06	GTAAACAAAGA
S. octosporus	oct_chrI	3463602	3463612	-	1.49e-06	GTAAACAAAGA
S. octosporus	oct_chrI	3756121	3756131	-	1.49e-06	GTAAACAAAGA
S. octosporus	oct_chrI	3759387	3759397	+	1.49e-06	GTAAACAAAGA
S. octosporus	oct_chrI	3873503	3873513	-	1.49e-06	GTAAACAAAGA
S. octosporus	oct_chrI	3998803	3998813	-	1.49e-06	GTAAACAAAGA
S. octosporus	oct_chrI	4101008	4101018	-	1.49e-06	GTAAACAAAGA
S. octosporus	oct_chrI	4209947	4209957	-	1.49e-06	GTAAACAAAGA
S. octosporus	oct_chrI	4290126	4290136	-	1.49e-06	GTAAACAAAGA
S. octosporus	oct_chrI	4371398	4371408	-	1.49e-06	GTAAACAAAGA
S. octosporus	oct_chrI	4460465	4460475	-	1.49e-06	GTAAACAAAGA
S. octosporus	oct_chrI	107875	107885	+	1.8e-06	GTAAACAAACC
S. octosporus	oct_chrI	289098	289108	+	1.8e-06	GTAAACAAACC
S. octosporus	oct_chrI	775459	775469	+	1.8e-06	GTAAACAAACC
S. octosporus	oct_chrI	1705771	1705781	+	1.8e-06	GTAAACAAACC
S. octosporus	oct_chrI	1753917	1753927	+	1.8e-06	GTAAACAAACC
S. octosporus	oct_chrI	2014998	2015008	+	1.8e-06	GTAAACAAACC
S. octosporus	oct_chrI	2513041	2513051	+	1.8e-06	GTAAACAAACC
S. octosporus	oct_chrI	3610717	3610727	+	1.8e-06	GTAAACAAACC
S. octosporus	oct_chrI	3672358	3672368	+	1.8e-06	GTAAACAAACC
S. octosporus	oct_chrI	3741174	3741184	+	1.8e-06	GTAAACAAACC
S. octosporus	oct_chrI	3789257	3789267	+	1.8e-06	GTAAACAAACC
S. octosporus	oct_chrI	4310449	4310459	+	1.8e-06	GTAAACAAACC
S. octosporus	oct_chrI	272082	272092	-	1.8e-06	GTAAACAAACC
S. octosporus	oct_chrI	330166	330176	-	1.8e-06	GTAAACAAACC
S. octosporus	oct_chrI	429842	429852	-	1.8e-06	GTAAACAAACC
S. octosporus	oct_chrI	512010	512020	-	1.8e-06	GTAAACAAACC
S. octosporus	oct_chrI	879318	879328	-	1.8e-06	GTAAACAAACC
S. octosporus	oct_chrI	1676008	1676018	-	1.8e-06	GTAAACAAACC
S. octosporus	oct_chrI	1900947	1900957	-	1.8e-06	GTAAACAAACC
S. octosporus	oct_chrI	1983327	1983337	-	1.8e-06	GTAAACAAACC
S. octosporus	oct_chrI	2019290	2019300	-	1.8e-06	GTAAACAAACC
S. octosporus	oct_chrI	2113760	2113770	-	1.8e-06	GTAAACAAACC
S. octosporus	oct_chrI	2286424	2286434	-	1.8e-06	GTAAACAAACC
S. octosporus	oct_chrI	2475401	2475411	-	1.8e-06	GTAAACAAACC
S. octosporus	oct_chrI	2926141	2926151	-	1.8e-06	GTAAACAAACC
S. octosporus	oct_chrI	3073338	3073348	-	1.8e-06	GTAAACAAACC
S. octosporus	oct_chrI	3123686	3123696	-	1.8e-06	GTAAACAAACC
S. octosporus	oct_chrI	3162408	3162418	-	1.8e-06	GTAAACAAACC
S. octosporus	oct_chrI	3228898	3228908	-	1.8e-06	GTAAACAAACC
S. octosporus	oct_chrI	3705789	3705799	-	1.8e-06	GTAAACAAACC
S. octosporus	oct_chrI	3873869	3873879	-	1.8e-06	GTAAACAAACC
S. octosporus	oct_chrI	4010519	4010529	-	1.8e-06	GTAAACAAACC
S. octosporus	oct_chrI	4059422	4059432	-	1.8e-06	GTAAACAAACC
S. octosporus	oct_chrI	4103108	4103118	-	1.8e-06	GTAAACAAACC
S. octosporus	oct_chrI	119351	119361	+	2.25e-06	GTAAACAAATA
S. octosporus	oct_chrI	191920	191930	-	2.25e-06	GTAAACAAATA
S. octosporus	oct_chrI	512780	512790	-	2.25e-06	GTAAACAAATA
S. octosporus	oct_chrI	591395	591405	+	2.25e-06	GTAAACAAATA
S. octosporus	oct_chrI	927600	927610	-	2.25e-06	GTAAACAAATA
S. octosporus	oct_chrI	977149	977159	-	2.25e-06	GTAAACAAATA
S. octosporus	oct_chrI	1035933	1035943	+	2.25e-06	GTAAACAAATA
S. octosporus	oct_chrI	1058005	1058015	-	2.25e-06	GTAAACAAATA
S. octosporus	oct_chrI	1063597	1063607	+	2.25e-06	GTAAACAAATA
S. octosporus	oct_chrI	1070948	1070958	-	2.25e-06	GTAAACAAATA
S. octosporus	oct_chrI	1121470	1121480	+	2.25e-06	GTAAACAAATA
S. octosporus	oct_chrI	1245487	1245497	+	2.25e-06	GTAAACAAATA
S. octosporus	oct_chrI	1261040	1261050	-	2.25e-06	GTAAACAAATA
S. octosporus	oct_chrI	1369292	1369302	-	2.25e-06	GTAAACAAATA
S. octosporus	oct_chrI	1532922	1532932	-	2.25e-06	GTAAACAAATA
S. octosporus	oct_chrI	1720367	1720377	-	2.25e-06	GTAAACAAATA
S. octosporus	oct_chrI	1913372	1913382	+	2.25e-06	GTAAACAAATA
S. octosporus	oct_chrI	1982648	1982658	-	2.25e-06	GTAAACAAATA
S. octosporus	oct_chrI	2313459	2313469	-	2.25e-06	GTAAACAAATA
S. octosporus	oct_chrI	2489442	2489452	-	2.25e-06	GTAAACAAATA
S. octosporus	oct_chrI	2566688	2566698	+	2.25e-06	GTAAACAAATA
S. octosporus	oct_chrI	2802006	2802016	-	2.25e-06	GTAAACAAATA
S. octosporus	oct_chrI	2819862	2819872	-	2.25e-06	GTAAACAAATA
S. octosporus	oct_chrI	2859375	2859385	-	2.25e-06	GTAAACAAATA
S. octosporus	oct_chrI	2861952	2861962	-	2.25e-06	GTAAACAAATA
S. octosporus	oct_chrI	3141033	3141043	+	2.25e-06	GTAAACAAATA
S. octosporus	oct_chrI	3163860	3163870	-	2.25e-06	GTAAACAAATA
S. octosporus	oct_chrI	3539773	3539783	-	2.25e-06	GTAAACAAATA
S. octosporus	oct_chrI	3780447	3780457	-	2.25e-06	GTAAACAAATA
S. octosporus	oct_chrI	3909134	3909144	+	2.25e-06	GTAAACAAATA
S. octosporus	oct_chrI	4017172	4017182	+	2.25e-06	GTAAACAAATA
S. octosporus	oct_chrI	4286250	4286260	-	2.25e-06	GTAAACAAATA
S. octosporus	oct_chrI	4293137	4293147	-	2.25e-06	GTAAACAAATA
S. octosporus	oct_chrI	4378112	4378122	+	2.25e-06	GTAAACAAATA
S. octosporus	oct_chrI	4416490	4416500	-	2.25e-06	GTAAACAAATA
S. octosporus	oct_chrI	66610	66620	+	2.62e-06	GAAAACAAACA
S. octosporus	oct_chrI	152511	152521	+	2.62e-06	GAAAACAAACA
S. octosporus	oct_chrI	160607	160617	+	2.62e-06	GAAAACAAACA
S. octosporus	oct_chrI	291179	291189	-	2.62e-06	GAAAACAAACA
S. octosporus	oct_chrI	671378	671388	+	2.62e-06	GAAAACAAACA
S. octosporus	oct_chrI	779154	779164	-	2.62e-06	GAAAACAAACA
S. octosporus	oct_chrI	791300	791310	-	2.62e-06	GAAAACAAACA
S. octosporus	oct_chrI	888116	888126	-	2.62e-06	GAAAACAAACA
S. octosporus	oct_chrI	905309	905319	-	2.62e-06	GAAAACAAACA
S. octosporus	oct_chrI	1058566	1058576	+	2.62e-06	GAAAACAAACA
S. octosporus	oct_chrI	1224084	1224094	+	2.62e-06	GAAAACAAACA
S. octosporus	oct_chrI	1242758	1242768	-	2.62e-06	GAAAACAAACA
S. octosporus	oct_chrI	1249067	1249077	+	2.62e-06	GAAAACAAACA
S. octosporus	oct_chrI	1351277	1351287	-	2.62e-06	GAAAACAAACA
S. octosporus	oct_chrI	1353602	1353612	+	2.62e-06	GAAAACAAACA
S. octosporus	oct_chrI	1374424	1374434	-	2.62e-06	GAAAACAAACA
S. octosporus	oct_chrI	1494666	1494676	-	2.62e-06	GAAAACAAACA
S. octosporus	oct_chrI	1543437	1543447	-	2.62e-06	GAAAACAAACA
S. octosporus	oct_chrI	1951978	1951988	+	2.62e-06	GAAAACAAACA
S. octosporus	oct_chrI	2172218	2172228	-	2.62e-06	GAAAACAAACA
S. octosporus	oct_chrI	2202825	2202835	-	2.62e-06	GAAAACAAACA
S. octosporus	oct_chrI	2204734	2204744	-	2.62e-06	GAAAACAAACA
S. octosporus	oct_chrI	3066634	3066644	+	2.62e-06	GAAAACAAACA
S. octosporus	oct_chrI	3811137	3811147	+	2.62e-06	GAAAACAAACA
S. octosporus	oct_chrI	3815303	3815313	+	2.62e-06	GAAAACAAACA
S. octosporus	oct_chrI	4172078	4172088	+	2.62e-06	GAAAACAAACA
S. octosporus	oct_chrI	4350630	4350640	-	2.62e-06	GAAAACAAACA
S. octosporus	oct_chrI	4468856	4468866	+	2.62e-06	GAAAACAAACA
S. octosporus	oct_chrI	283686	283696	-	2.99e-06	GTAAACAATCA
S. octosporus	oct_chrI	523236	523246	-	2.99e-06	GTAAACAATCA
S. octosporus	oct_chrI	556308	556318	+	2.99e-06	GTAAACAATCA
S. octosporus	oct_chrI	916106	916116	-	2.99e-06	GTAAACAATCA
S. octosporus	oct_chrI	1073677	1073687	-	2.99e-06	GTAAACAATCA
S. octosporus	oct_chrI	1376034	1376044	+	2.99e-06	GTAAACAATCA
S. octosporus	oct_chrI	2020699	2020709	+	2.99e-06	GTAAACAATCA
S. octosporus	oct_chrI	2217815	2217825	+	2.99e-06	GTAAACAATCA
S. octosporus	oct_chrI	2834654	2834664	-	2.99e-06	GTAAACAATCA
S. octosporus	oct_chrI	3303850	3303860	-	2.99e-06	GTAAACAATCA
S. octosporus	oct_chrI	3634855	3634865	+	2.99e-06	GTAAACAATCA
S. octosporus	oct_chrI	4068901	4068911	+	2.99e-06	GTAAACAATCA
S. octosporus	oct_chrI	4450010	4450020	-	2.99e-06	GTAAACAATCA
S. octosporus	oct_chrII	9089	9099	+	3.7e-07	GTAAACAAACA
S. octosporus	oct_chrII	30680	30690	+	3.7e-07	GTAAACAAACA
S. octosporus	oct_chrII	37011	37021	-	3.7e-07	GTAAACAAACA
S. octosporus	oct_chrII	37034	37044	-	3.7e-07	GTAAACAAACA
S. octosporus	oct_chrII	51245	51255	-	3.7e-07	GTAAACAAACA
S. octosporus	oct_chrII	132760	132770	+	3.7e-07	GTAAACAAACA
S. octosporus	oct_chrII	275053	275063	+	3.7e-07	GTAAACAAACA
S. octosporus	oct_chrII	315364	315374	-	3.7e-07	GTAAACAAACA
S. octosporus	oct_chrII	346930	346940	-	3.7e-07	GTAAACAAACA
S. octosporus	oct_chrII	360572	360582	-	3.7e-07	GTAAACAAACA
S. octosporus	oct_chrII	374933	374943	+	3.7e-07	GTAAACAAACA
S. octosporus	oct_chrII	409354	409364	-	3.7e-07	GTAAACAAACA
S. octosporus	oct_chrII	473206	473216	-	3.7e-07	GTAAACAAACA
S. octosporus	oct_chrII	496133	496143	+	3.7e-07	GTAAACAAACA
S. octosporus	oct_chrII	629705	629715	-	3.7e-07	GTAAACAAACA
S. octosporus	oct_chrII	638771	638781	+	3.7e-07	GTAAACAAACA
S. octosporus	oct_chrII	662088	662098	-	3.7e-07	GTAAACAAACA
S. octosporus	oct_chrII	767334	767344	+	3.7e-07	GTAAACAAACA
S. octosporus	oct_chrII	771207	771217	+	3.7e-07	GTAAACAAACA
S. octosporus	oct_chrII	843331	843341	-	3.7e-07	GTAAACAAACA
S. octosporus	oct_chrII	854186	854196	+	3.7e-07	GTAAACAAACA
S. octosporus	oct_chrII	947115	947125	+	3.7e-07	GTAAACAAACA
S. octosporus	oct_chrII	1020135	1020145	-	3.7e-07	GTAAACAAACA
S. octosporus	oct_chrII	1033817	1033827	+	3.7e-07	GTAAACAAACA
S. octosporus	oct_chrII	1050299	1050309	+	3.7e-07	GTAAACAAACA
S. octosporus	oct_chrII	1052296	1052306	+	3.7e-07	GTAAACAAACA
S. octosporus	oct_chrII	1084376	1084386	+	3.7e-07	GTAAACAAACA
S. octosporus	oct_chrII	1128708	1128718	-	3.7e-07	GTAAACAAACA
S. octosporus	oct_chrII	1175993	1176003	-	3.7e-07	GTAAACAAACA
S. octosporus	oct_chrII	1219277	1219287	+	3.7e-07	GTAAACAAACA
S. octosporus	oct_chrII	1393282	1393292	+	3.7e-07	GTAAACAAACA
S. octosporus	oct_chrII	1406805	1406815	-	3.7e-07	GTAAACAAACA
S. octosporus	oct_chrII	1757776	1757786	-	3.7e-07	GTAAACAAACA
S. octosporus	oct_chrII	1825188	1825198	+	3.7e-07	GTAAACAAACA
S. octosporus	oct_chrII	1842979	1842989	-	3.7e-07	GTAAACAAACA
S. octosporus	oct_chrII	2026169	2026179	+	3.7e-07	GTAAACAAACA
S. octosporus	oct_chrII	2085524	2085534	+	3.7e-07	GTAAACAAACA
S. octosporus	oct_chrII	2163474	2163484	-	3.7e-07	GTAAACAAACA
S. octosporus	oct_chrII	2279452	2279462	-	3.7e-07	GTAAACAAACA
S. octosporus	oct_chrII	2338337	2338347	+	3.7e-07	GTAAACAAACA
S. octosporus	oct_chrII	2375220	2375230	-	3.7e-07	GTAAACAAACA
S. octosporus	oct_chrII	2381463	2381473	+	3.7e-07	GTAAACAAACA
S. octosporus	oct_chrII	2395484	2395494	+	3.7e-07	GTAAACAAACA
S. octosporus	oct_chrII	2402179	2402189	-	3.7e-07	GTAAACAAACA
S. octosporus	oct_chrII	2454508	2454518	+	3.7e-07	GTAAACAAACA
S. octosporus	oct_chrII	2477201	2477211	-	3.7e-07	GTAAACAAACA
S. octosporus	oct_chrII	2545319	2545329	-	3.7e-07	GTAAACAAACA
S. octosporus	oct_chrII	2546386	2546396	+	3.7e-07	GTAAACAAACA
S. octosporus	oct_chrII	2683532	2683542	-	3.7e-07	GTAAACAAACA
S. octosporus	oct_chrII	2699614	2699624	-	3.7e-07	GTAAACAAACA
S. octosporus	oct_chrII	2714306	2714316	-	3.7e-07	GTAAACAAACA
S. octosporus	oct_chrII	2738463	2738473	-	3.7e-07	GTAAACAAACA
S. octosporus	oct_chrII	2738785	2738795	+	3.7e-07	GTAAACAAACA
S. octosporus	oct_chrII	2748985	2748995	-	3.7e-07	GTAAACAAACA
S. octosporus	oct_chrII	2757015	2757025	+	3.7e-07	GTAAACAAACA
S. octosporus	oct_chrII	2788029	2788039	+	3.7e-07	GTAAACAAACA
S. octosporus	oct_chrII	2828184	2828194	+	3.7e-07	GTAAACAAACA
S. octosporus	oct_chrII	2884373	2884383	-	3.7e-07	GTAAACAAACA
S. octosporus	oct_chrII	2887407	2887417	-	3.7e-07	GTAAACAAACA
S. octosporus	oct_chrII	2946882	2946892	-	3.7e-07	GTAAACAAACA
S. octosporus	oct_chrII	2965275	2965285	-	3.7e-07	GTAAACAAACA
S. octosporus	oct_chrII	3000512	3000522	-	3.7e-07	GTAAACAAACA
S. octosporus	oct_chrII	3015398	3015408	-	3.7e-07	GTAAACAAACA
S. octosporus	oct_chrII	3088165	3088175	-	3.7e-07	GTAAACAAACA
S. octosporus	oct_chrII	3100226	3100236	-	3.7e-07	GTAAACAAACA
S. octosporus	oct_chrII	3113675	3113685	-	3.7e-07	GTAAACAAACA
S. octosporus	oct_chrII	3122394	3122404	-	3.7e-07	GTAAACAAACA
S. octosporus	oct_chrII	3146974	3146984	+	3.7e-07	GTAAACAAACA
S. octosporus	oct_chrII	3154771	3154781	-	3.7e-07	GTAAACAAACA
S. octosporus	oct_chrII	3271825	3271835	+	3.7e-07	GTAAACAAACA
S. octosporus	oct_chrII	3419288	3419298	-	3.7e-07	GTAAACAAACA
S. octosporus	oct_chrII	3441014	3441024	+	3.7e-07	GTAAACAAACA
S. octosporus	oct_chrII	3444129	3444139	-	3.7e-07	GTAAACAAACA
S. octosporus	oct_chrII	3459635	3459645	-	3.7e-07	GTAAACAAACA
S. octosporus	oct_chrII	3572445	3572455	+	3.7e-07	GTAAACAAACA
S. octosporus	oct_chrII	3635213	3635223	-	3.7e-07	GTAAACAAACA
S. octosporus	oct_chrII	3678095	3678105	-	3.7e-07	GTAAACAAACA
S. octosporus	oct_chrII	3710562	3710572	-	3.7e-07	GTAAACAAACA
S. octosporus	oct_chrII	3749978	3749988	+	3.7e-07	GTAAACAAACA
S. octosporus	oct_chrII	3762345	3762355	-	3.7e-07	GTAAACAAACA
S. octosporus	oct_chrII	152334	152344	+	6.74e-07	GTAAACAAACG
S. octosporus	oct_chrII	294210	294220	+	6.74e-07	GTAAACAAACG
S. octosporus	oct_chrII	322276	322286	-	6.74e-07	GTAAACAAACG
S. octosporus	oct_chrII	449897	449907	-	6.74e-07	GTAAACAAACG
S. octosporus	oct_chrII	670785	670795	-	6.74e-07	GTAAACAAACG
S. octosporus	oct_chrII	1022616	1022626	-	6.74e-07	GTAAACAAACG
S. octosporus	oct_chrII	1601046	1601056	+	6.74e-07	GTAAACAAACG
S. octosporus	oct_chrII	1866746	1866756	+	6.74e-07	GTAAACAAACG
S. octosporus	oct_chrII	2207104	2207114	+	6.74e-07	GTAAACAAACG
S. octosporus	oct_chrII	2239621	2239631	+	6.74e-07	GTAAACAAACG
S. octosporus	oct_chrII	2805002	2805012	+	6.74e-07	GTAAACAAACG
S. octosporus	oct_chrII	3243990	3244000	-	6.74e-07	GTAAACAAACG
S. octosporus	oct_chrII	3266134	3266144	-	6.74e-07	GTAAACAAACG
S. octosporus	oct_chrII	78800	78810	-	1.12e-06	ATAAACAAACA
S. octosporus	oct_chrII	129759	129769	-	1.12e-06	ATAAACAAACA
S. octosporus	oct_chrII	211937	211947	-	1.12e-06	ATAAACAAACA
S. octosporus	oct_chrII	259029	259039	-	1.12e-06	ATAAACAAACA
S. octosporus	oct_chrII	412824	412834	+	1.12e-06	ATAAACAAACA
S. octosporus	oct_chrII	545244	545254	+	1.12e-06	ATAAACAAACA
S. octosporus	oct_chrII	621435	621445	-	1.12e-06	ATAAACAAACA
S. octosporus	oct_chrII	818193	818203	-	1.12e-06	ATAAACAAACA
S. octosporus	oct_chrII	818592	818602	+	1.12e-06	ATAAACAAACA
S. octosporus	oct_chrII	1053668	1053678	-	1.12e-06	ATAAACAAACA
S. octosporus	oct_chrII	1306032	1306042	-	1.12e-06	ATAAACAAACA
S. octosporus	oct_chrII	1441462	1441472	-	1.12e-06	ATAAACAAACA
S. octosporus	oct_chrII	1556097	1556107	-	1.12e-06	ATAAACAAACA
S. octosporus	oct_chrII	1622000	1622010	+	1.12e-06	ATAAACAAACA
S. octosporus	oct_chrII	1625739	1625749	+	1.12e-06	ATAAACAAACA
S. octosporus	oct_chrII	1673579	1673589	-	1.12e-06	ATAAACAAACA
S. octosporus	oct_chrII	1689436	1689446	-	1.12e-06	ATAAACAAACA
S. octosporus	oct_chrII	1978183	1978193	+	1.12e-06	ATAAACAAACA
S. octosporus	oct_chrII	2065886	2065896	+	1.12e-06	ATAAACAAACA
S. octosporus	oct_chrII	2250187	2250197	-	1.12e-06	ATAAACAAACA
S. octosporus	oct_chrII	2257580	2257590	+	1.12e-06	ATAAACAAACA
S. octosporus	oct_chrII	2375186	2375196	-	1.12e-06	ATAAACAAACA
S. octosporus	oct_chrII	2469052	2469062	-	1.12e-06	ATAAACAAACA
S. octosporus	oct_chrII	2541463	2541473	-	1.12e-06	ATAAACAAACA
S. octosporus	oct_chrII	2655041	2655051	-	1.12e-06	ATAAACAAACA
S. octosporus	oct_chrII	2757044	2757054	+	1.12e-06	ATAAACAAACA
S. octosporus	oct_chrII	2869890	2869900	+	1.12e-06	ATAAACAAACA
S. octosporus	oct_chrII	2899267	2899277	+	1.12e-06	ATAAACAAACA
S. octosporus	oct_chrII	2945699	2945709	+	1.12e-06	ATAAACAAACA
S. octosporus	oct_chrII	3131659	3131669	+	1.12e-06	ATAAACAAACA
S. octosporus	oct_chrII	3234245	3234255	-	1.12e-06	ATAAACAAACA
S. octosporus	oct_chrII	3249608	3249618	-	1.12e-06	ATAAACAAACA
S. octosporus	oct_chrII	3282430	3282440	+	1.12e-06	ATAAACAAACA
S. octosporus	oct_chrII	3524420	3524430	+	1.12e-06	ATAAACAAACA
S. octosporus	oct_chrII	3561158	3561168	-	1.12e-06	ATAAACAAACA
S. octosporus	oct_chrII	3581106	3581116	+	1.12e-06	ATAAACAAACA
S. octosporus	oct_chrII	3609369	3609379	-	1.12e-06	ATAAACAAACA
S. octosporus	oct_chrII	3634584	3634594	-	1.12e-06	ATAAACAAACA
S. octosporus	oct_chrII	3677010	3677020	+	1.12e-06	ATAAACAAACA
S. octosporus	oct_chrII	107713	107723	-	1.49e-06	GTAAACAAAGA
S. octosporus	oct_chrII	153821	153831	-	1.49e-06	GTAAACAAAGA
S. octosporus	oct_chrII	196698	196708	+	1.49e-06	GTAAACAAAGA
S. octosporus	oct_chrII	198029	198039	-	1.49e-06	GTAAACAAAGA
S. octosporus	oct_chrII	227298	227308	-	1.49e-06	GTAAACAAAGA
S. octosporus	oct_chrII	372496	372506	+	1.49e-06	GTAAACAAAGA
S. octosporus	oct_chrII	393150	393160	+	1.49e-06	GTAAACAAAGA
S. octosporus	oct_chrII	516401	516411	+	1.49e-06	GTAAACAAAGA
S. octosporus	oct_chrII	674634	674644	-	1.49e-06	GTAAACAAAGA
S. octosporus	oct_chrII	756994	757004	-	1.49e-06	GTAAACAAAGA
S. octosporus	oct_chrII	844364	844374	-	1.49e-06	GTAAACAAAGA
S. octosporus	oct_chrII	1072882	1072892	-	1.49e-06	GTAAACAAAGA
S. octosporus	oct_chrII	1111492	1111502	-	1.49e-06	GTAAACAAAGA
S. octosporus	oct_chrII	1264735	1264745	-	1.49e-06	GTAAACAAAGA
S. octosporus	oct_chrII	1276076	1276086	+	1.49e-06	GTAAACAAAGA
S. octosporus	oct_chrII	1855953	1855963	-	1.49e-06	GTAAACAAAGA
S. octosporus	oct_chrII	1997456	1997466	+	1.49e-06	GTAAACAAAGA
S. octosporus	oct_chrII	2110671	2110681	-	1.49e-06	GTAAACAAAGA
S. octosporus	oct_chrII	2225177	2225187	-	1.49e-06	GTAAACAAAGA
S. octosporus	oct_chrII	2248408	2248418	-	1.49e-06	GTAAACAAAGA
S. octosporus	oct_chrII	2518068	2518078	+	1.49e-06	GTAAACAAAGA
S. octosporus	oct_chrII	2794376	2794386	-	1.49e-06	GTAAACAAAGA
S. octosporus	oct_chrII	2898192	2898202	-	1.49e-06	GTAAACAAAGA
S. octosporus	oct_chrII	2965845	2965855	-	1.49e-06	GTAAACAAAGA
S. octosporus	oct_chrII	3131680	3131690	+	1.49e-06	GTAAACAAAGA
S. octosporus	oct_chrII	3300159	3300169	+	1.49e-06	GTAAACAAAGA
S. octosporus	oct_chrII	3496922	3496932	-	1.49e-06	GTAAACAAAGA
S. octosporus	oct_chrII	3682558	3682568	-	1.49e-06	GTAAACAAAGA
S. octosporus	oct_chrII	3754609	3754619	+	1.49e-06	GTAAACAAAGA
S. octosporus	oct_chrII	426810	426820	+	1.8e-06	GTAAACAAACC
S. octosporus	oct_chrII	674082	674092	+	1.8e-06	GTAAACAAACC
S. octosporus	oct_chrII	692356	692366	+	1.8e-06	GTAAACAAACC
S. octosporus	oct_chrII	800008	800018	+	1.8e-06	GTAAACAAACC
S. octosporus	oct_chrII	1029328	1029338	+	1.8e-06	GTAAACAAACC
S. octosporus	oct_chrII	1130162	1130172	+	1.8e-06	GTAAACAAACC
S. octosporus	oct_chrII	1249800	1249810	+	1.8e-06	GTAAACAAACC
S. octosporus	oct_chrII	2065795	2065805	+	1.8e-06	GTAAACAAACC
S. octosporus	oct_chrII	2238809	2238819	+	1.8e-06	GTAAACAAACC
S. octosporus	oct_chrII	2287227	2287237	+	1.8e-06	GTAAACAAACC
S. octosporus	oct_chrII	2529189	2529199	+	1.8e-06	GTAAACAAACC
S. octosporus	oct_chrII	2970580	2970590	+	1.8e-06	GTAAACAAACC
S. octosporus	oct_chrII	2982027	2982037	+	1.8e-06	GTAAACAAACC
S. octosporus	oct_chrII	3163841	3163851	+	1.8e-06	GTAAACAAACC
S. octosporus	oct_chrII	3403001	3403011	+	1.8e-06	GTAAACAAACC
S. octosporus	oct_chrII	3571392	3571402	+	1.8e-06	GTAAACAAACC
S. octosporus	oct_chrII	3572490	3572500	+	1.8e-06	GTAAACAAACC
S. octosporus	oct_chrII	513876	513886	-	1.8e-06	GTAAACAAACC
S. octosporus	oct_chrII	531911	531921	-	1.8e-06	GTAAACAAACC
S. octosporus	oct_chrII	726135	726145	-	1.8e-06	GTAAACAAACC
S. octosporus	oct_chrII	803747	803757	-	1.8e-06	GTAAACAAACC
S. octosporus	oct_chrII	862087	862097	-	1.8e-06	GTAAACAAACC
S. octosporus	oct_chrII	962140	962150	-	1.8e-06	GTAAACAAACC
S. octosporus	oct_chrII	1319195	1319205	-	1.8e-06	GTAAACAAACC
S. octosporus	oct_chrII	1725261	1725271	-	1.8e-06	GTAAACAAACC
S. octosporus	oct_chrII	2059705	2059715	-	1.8e-06	GTAAACAAACC
S. octosporus	oct_chrII	2374056	2374066	-	1.8e-06	GTAAACAAACC
S. octosporus	oct_chrII	2525004	2525014	-	1.8e-06	GTAAACAAACC
S. octosporus	oct_chrII	3396331	3396341	-	1.8e-06	GTAAACAAACC
S. octosporus	oct_chrII	3477308	3477318	-	1.8e-06	GTAAACAAACC
S. octosporus	oct_chrII	3527892	3527902	-	1.8e-06	GTAAACAAACC
S. octosporus	oct_chrII	3687882	3687892	-	1.8e-06	GTAAACAAACC
S. octosporus	oct_chrII	31554	31564	-	2.25e-06	GTAAACAAATA
S. octosporus	oct_chrII	66067	66077	+	2.25e-06	GTAAACAAATA
S. octosporus	oct_chrII	265677	265687	+	2.25e-06	GTAAACAAATA
S. octosporus	oct_chrII	346892	346902	-	2.25e-06	GTAAACAAATA
S. octosporus	oct_chrII	375075	375085	+	2.25e-06	GTAAACAAATA
S. octosporus	oct_chrII	427359	427369	-	2.25e-06	GTAAACAAATA
S. octosporus	oct_chrII	485492	485502	+	2.25e-06	GTAAACAAATA
S. octosporus	oct_chrII	629487	629497	-	2.25e-06	GTAAACAAATA
S. octosporus	oct_chrII	725865	725875	-	2.25e-06	GTAAACAAATA
S. octosporus	oct_chrII	867110	867120	-	2.25e-06	GTAAACAAATA
S. octosporus	oct_chrII	1006247	1006257	-	2.25e-06	GTAAACAAATA
S. octosporus	oct_chrII	1050908	1050918	+	2.25e-06	GTAAACAAATA
S. octosporus	oct_chrII	1435212	1435222	-	2.25e-06	GTAAACAAATA
S. octosporus	oct_chrII	1603446	1603456	+	2.25e-06	GTAAACAAATA
S. octosporus	oct_chrII	2064004	2064014	+	2.25e-06	GTAAACAAATA
S. octosporus	oct_chrII	2100238	2100248	+	2.25e-06	GTAAACAAATA
S. octosporus	oct_chrII	2168689	2168699	-	2.25e-06	GTAAACAAATA
S. octosporus	oct_chrII	2828224	2828234	-	2.25e-06	GTAAACAAATA
S. octosporus	oct_chrII	2894425	2894435	-	2.25e-06	GTAAACAAATA
S. octosporus	oct_chrII	2923710	2923720	-	2.25e-06	GTAAACAAATA
S. octosporus	oct_chrII	2951407	2951417	+	2.25e-06	GTAAACAAATA
S. octosporus	oct_chrII	3207673	3207683	+	2.25e-06	GTAAACAAATA
S. octosporus	oct_chrII	3279774	3279784	+	2.25e-06	GTAAACAAATA
S. octosporus	oct_chrII	3369216	3369226	-	2.25e-06	GTAAACAAATA
S. octosporus	oct_chrII	3413445	3413455	+	2.25e-06	GTAAACAAATA
S. octosporus	oct_chrII	3413759	3413769	+	2.25e-06	GTAAACAAATA
S. octosporus	oct_chrII	3428987	3428997	-	2.25e-06	GTAAACAAATA
S. octosporus	oct_chrII	3459590	3459600	-	2.25e-06	GTAAACAAATA
S. octosporus	oct_chrII	3467840	3467850	-	2.25e-06	GTAAACAAATA
S. octosporus	oct_chrII	3571966	3571976	+	2.25e-06	GTAAACAAATA
S. octosporus	oct_chrII	3596800	3596810	-	2.25e-06	GTAAACAAATA
S. octosporus	oct_chrII	3628095	3628105	+	2.25e-06	GTAAACAAATA
S. octosporus	oct_chrII	217495	217505	+	2.62e-06	GAAAACAAACA
S. octosporus	oct_chrII	425152	425162	+	2.62e-06	GAAAACAAACA
S. octosporus	oct_chrII	668997	669007	+	2.62e-06	GAAAACAAACA
S. octosporus	oct_chrII	691555	691565	-	2.62e-06	GAAAACAAACA
S. octosporus	oct_chrII	1024980	1024990	+	2.62e-06	GAAAACAAACA
S. octosporus	oct_chrII	1164740	1164750	+	2.62e-06	GAAAACAAACA
S. octosporus	oct_chrII	1495307	1495317	-	2.62e-06	GAAAACAAACA
S. octosporus	oct_chrII	1657309	1657319	-	2.62e-06	GAAAACAAACA
S. octosporus	oct_chrII	2035368	2035378	-	2.62e-06	GAAAACAAACA
S. octosporus	oct_chrII	2667465	2667475	+	2.62e-06	GAAAACAAACA
S. octosporus	oct_chrII	2682938	2682948	-	2.62e-06	GAAAACAAACA
S. octosporus	oct_chrII	3139763	3139773	+	2.62e-06	GAAAACAAACA
S. octosporus	oct_chrII	3518080	3518090	+	2.62e-06	GAAAACAAACA
S. octosporus	oct_chrII	3642935	3642945	+	2.62e-06	GAAAACAAACA
S. octosporus	oct_chrII	3724202	3724212	+	2.62e-06	GAAAACAAACA
S. octosporus	oct_chrII	236560	236570	+	2.99e-06	GTAAACAATCA
S. octosporus	oct_chrII	1000081	1000091	-	2.99e-06	GTAAACAATCA
S. octosporus	oct_chrII	1086497	1086507	-	2.99e-06	GTAAACAATCA
S. octosporus	oct_chrII	1838649	1838659	+	2.99e-06	GTAAACAATCA
S. octosporus	oct_chrII	2281282	2281292	+	2.99e-06	GTAAACAATCA
S. octosporus	oct_chrII	2557670	2557680	-	2.99e-06	GTAAACAATCA
S. octosporus	oct_chrII	3380508	3380518	-	2.99e-06	GTAAACAATCA
S. octosporus	oct_chrIII	4286	4296	+	3.7e-07	GTAAACAAACA
S. octosporus	oct_chrIII	91474	91484	+	3.7e-07	GTAAACAAACA
S. octosporus	oct_chrIII	310865	310875	-	3.7e-07	GTAAACAAACA
S. octosporus	oct_chrIII	365973	365983	-	3.7e-07	GTAAACAAACA
S. octosporus	oct_chrIII	446936	446946	+	3.7e-07	GTAAACAAACA
S. octosporus	oct_chrIII	446985	446995	-	3.7e-07	GTAAACAAACA
S. octosporus	oct_chrIII	617556	617566	-	3.7e-07	GTAAACAAACA
S. octosporus	oct_chrIII	633226	633236	+	3.7e-07	GTAAACAAACA
S. octosporus	oct_chrIII	778381	778391	+	3.7e-07	GTAAACAAACA
S. octosporus	oct_chrIII	803070	803080	+	3.7e-07	GTAAACAAACA
S. octosporus	oct_chrIII	944689	944699	+	3.7e-07	GTAAACAAACA
S. octosporus	oct_chrIII	977728	977738	-	3.7e-07	GTAAACAAACA
S. octosporus	oct_chrIII	1019138	1019148	-	3.7e-07	GTAAACAAACA
S. octosporus	oct_chrIII	1141384	1141394	+	3.7e-07	GTAAACAAACA
S. octosporus	oct_chrIII	1194132	1194142	-	3.7e-07	GTAAACAAACA
S. octosporus	oct_chrIII	1244650	1244660	+	3.7e-07	GTAAACAAACA
S. octosporus	oct_chrIII	1376174	1376184	-	3.7e-07	GTAAACAAACA
S. octosporus	oct_chrIII	1378854	1378864	-	3.7e-07	GTAAACAAACA
S. octosporus	oct_chrIII	1440016	1440026	-	3.7e-07	GTAAACAAACA
S. octosporus	oct_chrIII	1440344	1440354	+	3.7e-07	GTAAACAAACA
S. octosporus	oct_chrIII	1442699	1442709	-	3.7e-07	GTAAACAAACA
S. octosporus	oct_chrIII	1462167	1462177	-	3.7e-07	GTAAACAAACA
S. octosporus	oct_chrIII	1462320	1462330	+	3.7e-07	GTAAACAAACA
S. octosporus	oct_chrIII	1551946	1551956	-	3.7e-07	GTAAACAAACA
S. octosporus	oct_chrIII	1562453	1562463	-	3.7e-07	GTAAACAAACA
S. octosporus	oct_chrIII	1601703	1601713	-	3.7e-07	GTAAACAAACA
S. octosporus	oct_chrIII	1622247	1622257	+	3.7e-07	GTAAACAAACA
S. octosporus	oct_chrIII	1678336	1678346	+	3.7e-07	GTAAACAAACA
S. octosporus	oct_chrIII	1826897	1826907	-	3.7e-07	GTAAACAAACA
S. octosporus	oct_chrIII	1912638	1912648	+	3.7e-07	GTAAACAAACA
S. octosporus	oct_chrIII	1922400	1922410	+	3.7e-07	GTAAACAAACA
S. octosporus	oct_chrIII	2064625	2064635	-	3.7e-07	GTAAACAAACA
S. octosporus	oct_chrIII	2064668	2064678	-	3.7e-07	GTAAACAAACA
S. octosporus	oct_chrIII	2153417	2153427	-	3.7e-07	GTAAACAAACA
S. octosporus	oct_chrIII	2153528	2153538	+	3.7e-07	GTAAACAAACA
S. octosporus	oct_chrIII	2165376	2165386	-	3.7e-07	GTAAACAAACA
S. octosporus	oct_chrIII	2204696	2204706	-	3.7e-07	GTAAACAAACA
S. octosporus	oct_chrIII	2255437	2255447	+	3.7e-07	GTAAACAAACA
S. octosporus	oct_chrIII	2255638	2255648	+	3.7e-07	GTAAACAAACA
S. octosporus	oct_chrIII	2367034	2367044	-	3.7e-07	GTAAACAAACA
S. octosporus	oct_chrIII	2399388	2399398	+	3.7e-07	GTAAACAAACA
S. octosporus	oct_chrIII	2464203	2464213	+	3.7e-07	GTAAACAAACA
S. octosporus	oct_chrIII	2558706	2558716	-	3.7e-07	GTAAACAAACA
S. octosporus	oct_chrIII	2622791	2622801	+	3.7e-07	GTAAACAAACA
S. octosporus	oct_chrIII	2680712	2680722	+	3.7e-07	GTAAACAAACA
S. octosporus	oct_chrIII	2766849	2766859	-	3.7e-07	GTAAACAAACA
S. octosporus	oct_chrIII	2770710	2770720	-	3.7e-07	GTAAACAAACA
S. octosporus	oct_chrIII	2807627	2807637	-	3.7e-07	GTAAACAAACA
S. octosporus	oct_chrIII	2875970	2875980	+	3.7e-07	GTAAACAAACA
S. octosporus	oct_chrIII	2891125	2891135	-	3.7e-07	GTAAACAAACA
S. octosporus	oct_chrIII	2892023	2892033	+	3.7e-07	GTAAACAAACA
S. octosporus	oct_chrIII	70722	70732	-	6.74e-07	GTAAACAAACG
S. octosporus	oct_chrIII	267774	267784	-	6.74e-07	GTAAACAAACG
S. octosporus	oct_chrIII	331763	331773	+	6.74e-07	GTAAACAAACG
S. octosporus	oct_chrIII	477957	477967	-	6.74e-07	GTAAACAAACG
S. octosporus	oct_chrIII	924641	924651	+	6.74e-07	GTAAACAAACG
S. octosporus	oct_chrIII	934563	934573	+	6.74e-07	GTAAACAAACG
S. octosporus	oct_chrIII	997837	997847	-	6.74e-07	GTAAACAAACG
S. octosporus	oct_chrIII	1135292	1135302	-	6.74e-07	GTAAACAAACG
S. octosporus	oct_chrIII	1242846	1242856	-	6.74e-07	GTAAACAAACG
S. octosporus	oct_chrIII	1474792	1474802	+	6.74e-07	GTAAACAAACG
S. octosporus	oct_chrIII	1575594	1575604	-	6.74e-07	GTAAACAAACG
S. octosporus	oct_chrIII	1720404	1720414	+	6.74e-07	GTAAACAAACG
S. octosporus	oct_chrIII	2000893	2000903	-	6.74e-07	GTAAACAAACG
S. octosporus	oct_chrIII	2094038	2094048	+	6.74e-07	GTAAACAAACG
S. octosporus	oct_chrIII	2192200	2192210	-	6.74e-07	GTAAACAAACG
S. octosporus	oct_chrIII	2236527	2236537	-	6.74e-07	GTAAACAAACG
S. octosporus	oct_chrIII	2269376	2269386	+	6.74e-07	GTAAACAAACG
S. octosporus	oct_chrIII	2302124	2302134	+	6.74e-07	GTAAACAAACG
S. octosporus	oct_chrIII	2411012	2411022	+	6.74e-07	GTAAACAAACG
S. octosporus	oct_chrIII	16015	16025	+	1.12e-06	ATAAACAAACA
S. octosporus	oct_chrIII	111326	111336	+	1.12e-06	ATAAACAAACA
S. octosporus	oct_chrIII	154036	154046	-	1.12e-06	ATAAACAAACA
S. octosporus	oct_chrIII	272672	272682	+	1.12e-06	ATAAACAAACA
S. octosporus	oct_chrIII	331190	331200	+	1.12e-06	ATAAACAAACA
S. octosporus	oct_chrIII	341408	341418	-	1.12e-06	ATAAACAAACA
S. octosporus	oct_chrIII	425456	425466	+	1.12e-06	ATAAACAAACA
S. octosporus	oct_chrIII	581535	581545	-	1.12e-06	ATAAACAAACA
S. octosporus	oct_chrIII	854182	854192	-	1.12e-06	ATAAACAAACA
S. octosporus	oct_chrIII	862708	862718	-	1.12e-06	ATAAACAAACA
S. octosporus	oct_chrIII	1064125	1064135	+	1.12e-06	ATAAACAAACA
S. octosporus	oct_chrIII	1078874	1078884	+	1.12e-06	ATAAACAAACA
S. octosporus	oct_chrIII	1521147	1521157	+	1.12e-06	ATAAACAAACA
S. octosporus	oct_chrIII	1626423	1626433	+	1.12e-06	ATAAACAAACA
S. octosporus	oct_chrIII	1636109	1636119	-	1.12e-06	ATAAACAAACA
S. octosporus	oct_chrIII	1945128	1945138	-	1.12e-06	ATAAACAAACA
S. octosporus	oct_chrIII	1958652	1958662	-	1.12e-06	ATAAACAAACA
S. octosporus	oct_chrIII	2013071	2013081	-	1.12e-06	ATAAACAAACA
S. octosporus	oct_chrIII	2261041	2261051	+	1.12e-06	ATAAACAAACA
S. octosporus	oct_chrIII	2318918	2318928	+	1.12e-06	ATAAACAAACA
S. octosporus	oct_chrIII	2366684	2366694	+	1.12e-06	ATAAACAAACA
S. octosporus	oct_chrIII	2483970	2483980	-	1.12e-06	ATAAACAAACA
S. octosporus	oct_chrIII	2643052	2643062	+	1.12e-06	ATAAACAAACA
S. octosporus	oct_chrIII	2714274	2714284	+	1.12e-06	ATAAACAAACA
S. octosporus	oct_chrIII	2892172	2892182	-	1.12e-06	ATAAACAAACA
S. octosporus	oct_chrIII	2928219	2928229	+	1.12e-06	ATAAACAAACA
S. octosporus	oct_chrIII	640991	641001	+	1.49e-06	GTAAACAAAGA
S. octosporus	oct_chrIII	891365	891375	-	1.49e-06	GTAAACAAAGA
S. octosporus	oct_chrIII	956564	956574	-	1.49e-06	GTAAACAAAGA
S. octosporus	oct_chrIII	1061908	1061918	+	1.49e-06	GTAAACAAAGA
S. octosporus	oct_chrIII	1269684	1269694	-	1.49e-06	GTAAACAAAGA
S. octosporus	oct_chrIII	1379695	1379705	-	1.49e-06	GTAAACAAAGA
S. octosporus	oct_chrIII	1432620	1432630	-	1.49e-06	GTAAACAAAGA
S. octosporus	oct_chrIII	1602267	1602277	-	1.49e-06	GTAAACAAAGA
S. octosporus	oct_chrIII	1647562	1647572	+	1.49e-06	GTAAACAAAGA
S. octosporus	oct_chrIII	1866060	1866070	+	1.49e-06	GTAAACAAAGA
S. octosporus	oct_chrIII	1927142	1927152	-	1.49e-06	GTAAACAAAGA
S. octosporus	oct_chrIII	2027237	2027247	+	1.49e-06	GTAAACAAAGA
S. octosporus	oct_chrIII	2097802	2097812	+	1.49e-06	GTAAACAAAGA
S. octosporus	oct_chrIII	2153979	2153989	+	1.49e-06	GTAAACAAAGA
S. octosporus	oct_chrIII	2191328	2191338	+	1.49e-06	GTAAACAAAGA
S. octosporus	oct_chrIII	2192522	2192532	+	1.49e-06	GTAAACAAAGA
S. octosporus	oct_chrIII	2490452	2490462	-	1.49e-06	GTAAACAAAGA
S. octosporus	oct_chrIII	2664448	2664458	+	1.49e-06	GTAAACAAAGA
S. octosporus	oct_chrIII	2835914	2835924	-	1.49e-06	GTAAACAAAGA
S. octosporus	oct_chrIII	2860458	2860468	-	1.49e-06	GTAAACAAAGA
S. octosporus	oct_chrIII	2920082	2920092	+	1.49e-06	GTAAACAAAGA
S. octosporus	oct_chrIII	1172272	1172282	+	1.8e-06	GTAAACAAACC
S. octosporus	oct_chrIII	1302938	1302948	+	1.8e-06	GTAAACAAACC
S. octosporus	oct_chrIII	1351302	1351312	+	1.8e-06	GTAAACAAACC
S. octosporus	oct_chrIII	2676183	2676193	+	1.8e-06	GTAAACAAACC
S. octosporus	oct_chrIII	644955	644965	-	1.8e-06	GTAAACAAACC
S. octosporus	oct_chrIII	652678	652688	-	1.8e-06	GTAAACAAACC
S. octosporus	oct_chrIII	881139	881149	-	1.8e-06	GTAAACAAACC
S. octosporus	oct_chrIII	1859966	1859976	-	1.8e-06	GTAAACAAACC
S. octosporus	oct_chrIII	2105361	2105371	-	1.8e-06	GTAAACAAACC
S. octosporus	oct_chrIII	2483862	2483872	-	1.8e-06	GTAAACAAACC
S. octosporus	oct_chrIII	2570882	2570892	-	1.8e-06	GTAAACAAACC
S. octosporus	oct_chrIII	2638535	2638545	-	1.8e-06	GTAAACAAACC
S. octosporus	oct_chrIII	2659291	2659301	-	1.8e-06	GTAAACAAACC
S. octosporus	oct_chrIII	60601	60611	-	2.25e-06	GTAAACAAATA
S. octosporus	oct_chrIII	111465	111475	+	2.25e-06	GTAAACAAATA
S. octosporus	oct_chrIII	128153	128163	-	2.25e-06	GTAAACAAATA
S. octosporus	oct_chrIII	477989	477999	-	2.25e-06	GTAAACAAATA
S. octosporus	oct_chrIII	651417	651427	+	2.25e-06	GTAAACAAATA
S. octosporus	oct_chrIII	724451	724461	-	2.25e-06	GTAAACAAATA
S. octosporus	oct_chrIII	759175	759185	+	2.25e-06	GTAAACAAATA
S. octosporus	oct_chrIII	822398	822408	+	2.25e-06	GTAAACAAATA
S. octosporus	oct_chrIII	902344	902354	-	2.25e-06	GTAAACAAATA
S. octosporus	oct_chrIII	934756	934766	-	2.25e-06	GTAAACAAATA
S. octosporus	oct_chrIII	1004040	1004050	-	2.25e-06	GTAAACAAATA
S. octosporus	oct_chrIII	1052552	1052562	+	2.25e-06	GTAAACAAATA
S. octosporus	oct_chrIII	1294389	1294399	-	2.25e-06	GTAAACAAATA
S. octosporus	oct_chrIII	1419036	1419046	-	2.25e-06	GTAAACAAATA
S. octosporus	oct_chrIII	1625450	1625460	+	2.25e-06	GTAAACAAATA
S. octosporus	oct_chrIII	1682754	1682764	-	2.25e-06	GTAAACAAATA
S. octosporus	oct_chrIII	1728899	1728909	+	2.25e-06	GTAAACAAATA
S. octosporus	oct_chrIII	2030963	2030973	+	2.25e-06	GTAAACAAATA
S. octosporus	oct_chrIII	2069062	2069072	+	2.25e-06	GTAAACAAATA
S. octosporus	oct_chrIII	2073153	2073163	-	2.25e-06	GTAAACAAATA
S. octosporus	oct_chrIII	2303216	2303226	+	2.25e-06	GTAAACAAATA
S. octosporus	oct_chrIII	2391903	2391913	-	2.25e-06	GTAAACAAATA
S. octosporus	oct_chrIII	2427496	2427506	+	2.25e-06	GTAAACAAATA
S. octosporus	oct_chrIII	2493288	2493298	-	2.25e-06	GTAAACAAATA
S. octosporus	oct_chrIII	2529748	2529758	-	2.25e-06	GTAAACAAATA
S. octosporus	oct_chrIII	2567693	2567703	-	2.25e-06	GTAAACAAATA
S. octosporus	oct_chrIII	2622366	2622376	+	2.25e-06	GTAAACAAATA
S. octosporus	oct_chrIII	122955	122965	-	2.62e-06	GAAAACAAACA
S. octosporus	oct_chrIII	128170	128180	-	2.62e-06	GAAAACAAACA
S. octosporus	oct_chrIII	128606	128616	+	2.62e-06	GAAAACAAACA
S. octosporus	oct_chrIII	278862	278872	+	2.62e-06	GAAAACAAACA
S. octosporus	oct_chrIII	663150	663160	-	2.62e-06	GAAAACAAACA
S. octosporus	oct_chrIII	805105	805115	+	2.62e-06	GAAAACAAACA
S. octosporus	oct_chrIII	915609	915619	-	2.62e-06	GAAAACAAACA
S. octosporus	oct_chrIII	924186	924196	-	2.62e-06	GAAAACAAACA
S. octosporus	oct_chrIII	1244812	1244822	+	2.62e-06	GAAAACAAACA
S. octosporus	oct_chrIII	1496307	1496317	-	2.62e-06	GAAAACAAACA
S. octosporus	oct_chrIII	1511830	1511840	+	2.62e-06	GAAAACAAACA
S. octosporus	oct_chrIII	1709538	1709548	-	2.62e-06	GAAAACAAACA
S. octosporus	oct_chrIII	2058759	2058769	-	2.62e-06	GAAAACAAACA
S. octosporus	oct_chrIII	2062286	2062296	+	2.62e-06	GAAAACAAACA
S. octosporus	oct_chrIII	2190998	2191008	-	2.62e-06	GAAAACAAACA
S. octosporus	oct_chrIII	2237533	2237543	+	2.62e-06	GAAAACAAACA
S. octosporus	oct_chrIII	2500317	2500327	-	2.62e-06	GAAAACAAACA
S. octosporus	oct_chrIII	2847044	2847054	-	2.62e-06	GAAAACAAACA
S. octosporus	oct_chrIII	175516	175526	+	2.99e-06	GTAAACAATCA
S. octosporus	oct_chrIII	957838	957848	+	2.99e-06	GTAAACAATCA
S. octosporus	oct_chrIII	1044871	1044881	-	2.99e-06	GTAAACAATCA
S. octosporus	oct_chrIII	1724396	1724406	-	2.99e-06	GTAAACAATCA
S. cryophilus	cry_chrI	100253	100263	+	3.7e-07	GTAAACAAACA
S. cryophilus	cry_chrI	165821	165831	-	3.7e-07	GTAAACAAACA
S. cryophilus	cry_chrI	209195	209205	+	3.7e-07	GTAAACAAACA
S. cryophilus	cry_chrI	218048	218058	-	3.7e-07	GTAAACAAACA
S. cryophilus	cry_chrI	260383	260393	+	3.7e-07	GTAAACAAACA
S. cryophilus	cry_chrI	316839	316849	-	3.7e-07	GTAAACAAACA
S. cryophilus	cry_chrI	358564	358574	-	3.7e-07	GTAAACAAACA
S. cryophilus	cry_chrI	423190	423200	+	3.7e-07	GTAAACAAACA
S. cryophilus	cry_chrI	473140	473150	+	3.7e-07	GTAAACAAACA
S. cryophilus	cry_chrI	491029	491039	+	3.7e-07	GTAAACAAACA
S. cryophilus	cry_chrI	576776	576786	-	3.7e-07	GTAAACAAACA
S. cryophilus	cry_chrI	728871	728881	-	3.7e-07	GTAAACAAACA
S. cryophilus	cry_chrI	734693	734703	-	3.7e-07	GTAAACAAACA
S. cryophilus	cry_chrI	823924	823934	+	3.7e-07	GTAAACAAACA
S. cryophilus	cry_chrI	960585	960595	+	3.7e-07	GTAAACAAACA
S. cryophilus	cry_chrI	960603	960613	-	3.7e-07	GTAAACAAACA
S. cryophilus	cry_chrI	964494	964504	+	3.7e-07	GTAAACAAACA
S. cryophilus	cry_chrI	1045734	1045744	+	3.7e-07	GTAAACAAACA
S. cryophilus	cry_chrI	1085678	1085688	-	3.7e-07	GTAAACAAACA
S. cryophilus	cry_chrI	1106351	1106361	-	3.7e-07	GTAAACAAACA
S. cryophilus	cry_chrI	1113363	1113373	+	3.7e-07	GTAAACAAACA
S. cryophilus	cry_chrI	1113381	1113391	-	3.7e-07	GTAAACAAACA
S. cryophilus	cry_chrI	1113891	1113901	+	3.7e-07	GTAAACAAACA
S. cryophilus	cry_chrI	1167107	1167117	-	3.7e-07	GTAAACAAACA
S. cryophilus	cry_chrI	1201160	1201170	-	3.7e-07	GTAAACAAACA
S. cryophilus	cry_chrI	1227107	1227117	+	3.7e-07	GTAAACAAACA
S. cryophilus	cry_chrI	1227125	1227135	-	3.7e-07	GTAAACAAACA
S. cryophilus	cry_chrI	1245009	1245019	+	3.7e-07	GTAAACAAACA
S. cryophilus	cry_chrI	1249451	1249461	-	3.7e-07	GTAAACAAACA
S. cryophilus	cry_chrI	1334837	1334847	+	3.7e-07	GTAAACAAACA
S. cryophilus	cry_chrI	1512775	1512785	+	3.7e-07	GTAAACAAACA
S. cryophilus	cry_chrI	1671450	1671460	+	3.7e-07	GTAAACAAACA
S. cryophilus	cry_chrI	1703403	1703413	-	3.7e-07	GTAAACAAACA
S. cryophilus	cry_chrI	1780537	1780547	-	3.7e-07	GTAAACAAACA
S. cryophilus	cry_chrI	1884872	1884882	+	3.7e-07	GTAAACAAACA
S. cryophilus	cry_chrI	1931851	1931861	+	3.7e-07	GTAAACAAACA
S. cryophilus	cry_chrI	2024455	2024465	+	3.7e-07	GTAAACAAACA
S. cryophilus	cry_chrI	2066482	2066492	+	3.7e-07	GTAAACAAACA
S. cryophilus	cry_chrI	2096412	2096422	+	3.7e-07	GTAAACAAACA
S. cryophilus	cry_chrI	2186506	2186516	-	3.7e-07	GTAAACAAACA
S. cryophilus	cry_chrI	2293561	2293571	-	3.7e-07	GTAAACAAACA
S. cryophilus	cry_chrI	2307456	2307466	+	3.7e-07	GTAAACAAACA
S. cryophilus	cry_chrI	2327796	2327806	-	3.7e-07	GTAAACAAACA
S. cryophilus	cry_chrI	2328715	2328725	-	3.7e-07	GTAAACAAACA
S. cryophilus	cry_chrI	2347956	2347966	+	3.7e-07	GTAAACAAACA
S. cryophilus	cry_chrI	2465131	2465141	-	3.7e-07	GTAAACAAACA
S. cryophilus	cry_chrI	2530547	2530557	-	3.7e-07	GTAAACAAACA
S. cryophilus	cry_chrI	2549235	2549245	-	3.7e-07	GTAAACAAACA
S. cryophilus	cry_chrI	2797699	2797709	+	3.7e-07	GTAAACAAACA
S. cryophilus	cry_chrI	2856417	2856427	+	3.7e-07	GTAAACAAACA
S. cryophilus	cry_chrI	2881828	2881838	-	3.7e-07	GTAAACAAACA
S. cryophilus	cry_chrI	2903818	2903828	+	3.7e-07	GTAAACAAACA
S. cryophilus	cry_chrI	2905990	2906000	+	3.7e-07	GTAAACAAACA
S. cryophilus	cry_chrI	2935008	2935018	-	3.7e-07	GTAAACAAACA
S. cryophilus	cry_chrI	2944089	2944099	-	3.7e-07	GTAAACAAACA
S. cryophilus	cry_chrI	2993689	2993699	+	3.7e-07	GTAAACAAACA
S. cryophilus	cry_chrI	3043318	3043328	-	3.7e-07	GTAAACAAACA
S. cryophilus	cry_chrI	3073962	3073972	+	3.7e-07	GTAAACAAACA
S. cryophilus	cry_chrI	3081312	3081322	+	3.7e-07	GTAAACAAACA
S. cryophilus	cry_chrI	3109186	3109196	+	3.7e-07	GTAAACAAACA
S. cryophilus	cry_chrI	3127315	3127325	-	3.7e-07	GTAAACAAACA
S. cryophilus	cry_chrI	3256568	3256578	+	3.7e-07	GTAAACAAACA
S. cryophilus	cry_chrI	3272027	3272037	+	3.7e-07	GTAAACAAACA
S. cryophilus	cry_chrI	3360052	3360062	+	3.7e-07	GTAAACAAACA
S. cryophilus	cry_chrI	3360231	3360241	+	3.7e-07	GTAAACAAACA
S. cryophilus	cry_chrI	3418895	3418905	-	3.7e-07	GTAAACAAACA
S. cryophilus	cry_chrI	3439973	3439983	+	3.7e-07	GTAAACAAACA
S. cryophilus	cry_chrI	3486440	3486450	+	3.7e-07	GTAAACAAACA
S. cryophilus	cry_chrI	3516342	3516352	-	3.7e-07	GTAAACAAACA
S. cryophilus	cry_chrI	3575150	3575160	-	3.7e-07	GTAAACAAACA
S. cryophilus	cry_chrI	3656687	3656697	+	3.7e-07	GTAAACAAACA
S. cryophilus	cry_chrI	3742248	3742258	+	3.7e-07	GTAAACAAACA
S. cryophilus	cry_chrI	3806882	3806892	+	3.7e-07	GTAAACAAACA
S. cryophilus	cry_chrI	3874812	3874822	+	3.7e-07	GTAAACAAACA
S. cryophilus	cry_chrI	3970114	3970124	-	3.7e-07	GTAAACAAACA
S. cryophilus	cry_chrI	3988521	3988531	-	3.7e-07	GTAAACAAACA
S. cryophilus	cry_chrI	3998592	3998602	+	3.7e-07	GTAAACAAACA
S. cryophilus	cry_chrI	4032400	4032410	-	3.7e-07	GTAAACAAACA
S. cryophilus	cry_chrI	4070763	4070773	+	3.7e-07	GTAAACAAACA
S. cryophilus	cry_chrI	4110776	4110786	-	3.7e-07	GTAAACAAACA
S. cryophilus	cry_chrI	4122223	4122233	+	3.7e-07	GTAAACAAACA
S. cryophilus	cry_chrI	4173212	4173222	+	3.7e-07	GTAAACAAACA
S. cryophilus	cry_chrI	4183203	4183213	-	3.7e-07	GTAAACAAACA
S. cryophilus	cry_chrI	4200915	4200925	-	3.7e-07	GTAAACAAACA
S. cryophilus	cry_chrI	4216787	4216797	+	3.7e-07	GTAAACAAACA
S. cryophilus	cry_chrI	4325469	4325479	-	3.7e-07	GTAAACAAACA
S. cryophilus	cry_chrI	4358189	4358199	+	3.7e-07	GTAAACAAACA
S. cryophilus	cry_chrI	4375364	4375374	+	3.7e-07	GTAAACAAACA
S. cryophilus	cry_chrI	4386131	4386141	+	3.7e-07	GTAAACAAACA
S. cryophilus	cry_chrI	4388700	4388710	+	3.7e-07	GTAAACAAACA
S. cryophilus	cry_chrI	4620312	4620322	-	3.7e-07	GTAAACAAACA
S. cryophilus	cry_chrI	4623114	4623124	-	3.7e-07	GTAAACAAACA
S. cryophilus	cry_chrI	4674511	4674521	-	3.7e-07	GTAAACAAACA
S. cryophilus	cry_chrI	4675561	4675571	-	3.7e-07	GTAAACAAACA
S. cryophilus	cry_chrI	4687014	4687024	-	3.7e-07	GTAAACAAACA
S. cryophilus	cry_chrI	4687611	4687621	-	3.7e-07	GTAAACAAACA
S. cryophilus	cry_chrI	4702115	4702125	-	3.7e-07	GTAAACAAACA
S. cryophilus	cry_chrI	4715704	4715714	-	3.7e-07	GTAAACAAACA
S. cryophilus	cry_chrI	4754767	4754777	+	3.7e-07	GTAAACAAACA
S. cryophilus	cry_chrI	4844455	4844465	+	3.7e-07	GTAAACAAACA
S. cryophilus	cry_chrI	4865100	4865110	+	3.7e-07	GTAAACAAACA
S. cryophilus	cry_chrI	4867147	4867157	-	3.7e-07	GTAAACAAACA
S. cryophilus	cry_chrI	104982	104992	-	6.74e-07	GTAAACAAACG
S. cryophilus	cry_chrI	394081	394091	+	6.74e-07	GTAAACAAACG
S. cryophilus	cry_chrI	406298	406308	+	6.74e-07	GTAAACAAACG
S. cryophilus	cry_chrI	435285	435295	+	6.74e-07	GTAAACAAACG
S. cryophilus	cry_chrI	595005	595015	+	6.74e-07	GTAAACAAACG
S. cryophilus	cry_chrI	720516	720526	-	6.74e-07	GTAAACAAACG
S. cryophilus	cry_chrI	752794	752804	+	6.74e-07	GTAAACAAACG
S. cryophilus	cry_chrI	798176	798186	-	6.74e-07	GTAAACAAACG
S. cryophilus	cry_chrI	914802	914812	+	6.74e-07	GTAAACAAACG
S. cryophilus	cry_chrI	986275	986285	+	6.74e-07	GTAAACAAACG
S. cryophilus	cry_chrI	1182618	1182628	-	6.74e-07	GTAAACAAACG
S. cryophilus	cry_chrI	1255660	1255670	-	6.74e-07	GTAAACAAACG
S. cryophilus	cry_chrI	1335226	1335236	+	6.74e-07	GTAAACAAACG
S. cryophilus	cry_chrI	1411467	1411477	+	6.74e-07	GTAAACAAACG
S. cryophilus	cry_chrI	1447920	1447930	-	6.74e-07	GTAAACAAACG
S. cryophilus	cry_chrI	1451744	1451754	-	6.74e-07	GTAAACAAACG
S. cryophilus	cry_chrI	1455568	1455578	-	6.74e-07	GTAAACAAACG
S. cryophilus	cry_chrI	1660061	1660071	+	6.74e-07	GTAAACAAACG
S. cryophilus	cry_chrI	2334107	2334117	+	6.74e-07	GTAAACAAACG
S. cryophilus	cry_chrI	2533971	2533981	+	6.74e-07	GTAAACAAACG
S. cryophilus	cry_chrI	2709714	2709724	+	6.74e-07	GTAAACAAACG
S. cryophilus	cry_chrI	2941341	2941351	+	6.74e-07	GTAAACAAACG
S. cryophilus	cry_chrI	2973384	2973394	-	6.74e-07	GTAAACAAACG
S. cryophilus	cry_chrI	3094605	3094615	+	6.74e-07	GTAAACAAACG
S. cryophilus	cry_chrI	3141945	3141955	-	6.74e-07	GTAAACAAACG
S. cryophilus	cry_chrI	3205943	3205953	+	6.74e-07	GTAAACAAACG
S. cryophilus	cry_chrI	3262978	3262988	+	6.74e-07	GTAAACAAACG
S. cryophilus	cry_chrI	3382269	3382279	-	6.74e-07	GTAAACAAACG
S. cryophilus	cry_chrI	3671132	3671142	+	6.74e-07	GTAAACAAACG
S. cryophilus	cry_chrI	3708862	3708872	+	6.74e-07	GTAAACAAACG
S. cryophilus	cry_chrI	3734580	3734590	+	6.74e-07	GTAAACAAACG
S. cryophilus	cry_chrI	3978384	3978394	+	6.74e-07	GTAAACAAACG
S. cryophilus	cry_chrI	3979430	3979440	-	6.74e-07	GTAAACAAACG
S. cryophilus	cry_chrI	4053671	4053681	-	6.74e-07	GTAAACAAACG
S. cryophilus	cry_chrI	4150311	4150321	-	6.74e-07	GTAAACAAACG
S. cryophilus	cry_chrI	4375381	4375391	-	6.74e-07	GTAAACAAACG
S. cryophilus	cry_chrI	4414569	4414579	+	6.74e-07	GTAAACAAACG
S. cryophilus	cry_chrI	4493991	4494001	+	6.74e-07	GTAAACAAACG
S. cryophilus	cry_chrI	4559501	4559511	-	6.74e-07	GTAAACAAACG
S. cryophilus	cry_chrI	4648992	4649002	-	6.74e-07	GTAAACAAACG
S. cryophilus	cry_chrI	4739617	4739627	+	6.74e-07	GTAAACAAACG
S. cryophilus	cry_chrI	26041	26051	-	1.12e-06	ATAAACAAACA
S. cryophilus	cry_chrI	132897	132907	+	1.12e-06	ATAAACAAACA
S. cryophilus	cry_chrI	300580	300590	-	1.12e-06	ATAAACAAACA
S. cryophilus	cry_chrI	522105	522115	+	1.12e-06	ATAAACAAACA
S. cryophilus	cry_chrI	558585	558595	-	1.12e-06	ATAAACAAACA
S. cryophilus	cry_chrI	584241	584251	+	1.12e-06	ATAAACAAACA
S. cryophilus	cry_chrI	587299	587309	-	1.12e-06	ATAAACAAACA
S. cryophilus	cry_chrI	734091	734101	+	1.12e-06	ATAAACAAACA
S. cryophilus	cry_chrI	737912	737922	+	1.12e-06	ATAAACAAACA
S. cryophilus	cry_chrI	825680	825690	-	1.12e-06	ATAAACAAACA
S. cryophilus	cry_chrI	914508	914518	-	1.12e-06	ATAAACAAACA
S. cryophilus	cry_chrI	925247	925257	+	1.12e-06	ATAAACAAACA
S. cryophilus	cry_chrI	1012543	1012553	+	1.12e-06	ATAAACAAACA
S. cryophilus	cry_chrI	1012559	1012569	+	1.12e-06	ATAAACAAACA
S. cryophilus	cry_chrI	1050341	1050351	+	1.12e-06	ATAAACAAACA
S. cryophilus	cry_chrI	1112879	1112889	-	1.12e-06	ATAAACAAACA
S. cryophilus	cry_chrI	1220072	1220082	-	1.12e-06	ATAAACAAACA
S. cryophilus	cry_chrI	1291031	1291041	-	1.12e-06	ATAAACAAACA
S. cryophilus	cry_chrI	1505156	1505166	-	1.12e-06	ATAAACAAACA
S. cryophilus	cry_chrI	1516500	1516510	+	1.12e-06	ATAAACAAACA
S. cryophilus	cry_chrI	1583520	1583530	+	1.12e-06	ATAAACAAACA
S. cryophilus	cry_chrI	1606196	1606206	-	1.12e-06	ATAAACAAACA
S. cryophilus	cry_chrI	1671437	1671447	+	1.12e-06	ATAAACAAACA
S. cryophilus	cry_chrI	2024388	2024398	-	1.12e-06	ATAAACAAACA
S. cryophilus	cry_chrI	2082625	2082635	-	1.12e-06	ATAAACAAACA
S. cryophilus	cry_chrI	2126881	2126891	+	1.12e-06	ATAAACAAACA
S. cryophilus	cry_chrI	2187096	2187106	-	1.12e-06	ATAAACAAACA
S. cryophilus	cry_chrI	2240877	2240887	-	1.12e-06	ATAAACAAACA
S. cryophilus	cry_chrI	2283977	2283987	-	1.12e-06	ATAAACAAACA
S. cryophilus	cry_chrI	2345973	2345983	+	1.12e-06	ATAAACAAACA
S. cryophilus	cry_chrI	2385663	2385673	-	1.12e-06	ATAAACAAACA
S. cryophilus	cry_chrI	2386087	2386097	+	1.12e-06	ATAAACAAACA
S. cryophilus	cry_chrI	2541539	2541549	+	1.12e-06	ATAAACAAACA
S. cryophilus	cry_chrI	2552864	2552874	+	1.12e-06	ATAAACAAACA
S. cryophilus	cry_chrI	2552881	2552891	+	1.12e-06	ATAAACAAACA
S. cryophilus	cry_chrI	2932638	2932648	-	1.12e-06	ATAAACAAACA
S. cryophilus	cry_chrI	3140326	3140336	-	1.12e-06	ATAAACAAACA
S. cryophilus	cry_chrI	3197692	3197702	+	1.12e-06	ATAAACAAACA
S. cryophilus	cry_chrI	3560230	3560240	-	1.12e-06	ATAAACAAACA
S. cryophilus	cry_chrI	3563290	3563300	-	1.12e-06	ATAAACAAACA
S. cryophilus	cry_chrI	3576616	3576626	-	1.12e-06	ATAAACAAACA
S. cryophilus	cry_chrI	3729929	3729939	+	1.12e-06	ATAAACAAACA
S. cryophilus	cry_chrI	3780767	3780777	-	1.12e-06	ATAAACAAACA
S. cryophilus	cry_chrI	3819363	3819373	+	1.12e-06	ATAAACAAACA
S. cryophilus	cry_chrI	3973302	3973312	-	1.12e-06	ATAAACAAACA
S. cryophilus	cry_chrI	4162489	4162499	+	1.12e-06	ATAAACAAACA
S. cryophilus	cry_chrI	4388748	4388758	-	1.12e-06	ATAAACAAACA
S. cryophilus	cry_chrI	4416701	4416711	+	1.12e-06	ATAAACAAACA
S. cryophilus	cry_chrI	4431015	4431025	-	1.12e-06	ATAAACAAACA
S. cryophilus	cry_chrI	4490997	4491007	-	1.12e-06	ATAAACAAACA
S. cryophilus	cry_chrI	4505438	4505448	-	1.12e-06	ATAAACAAACA
S. cryophilus	cry_chrI	4670606	4670616	+	1.12e-06	ATAAACAAACA
S. cryophilus	cry_chrI	4749657	4749667	+	1.12e-06	ATAAACAAACA
S. cryophilus	cry_chrI	4805803	4805813	-	1.12e-06	ATAAACAAACA
S. cryophilus	cry_chrI	4805890	4805900	+	1.12e-06	ATAAACAAACA
S. cryophilus	cry_chrI	4846075	4846085	-	1.12e-06	ATAAACAAACA
S. cryophilus	cry_chrI	763631	763641	+	1.49e-06	GTAAACAAAGA
S. cryophilus	cry_chrI	831924	831934	+	1.49e-06	GTAAACAAAGA
S. cryophilus	cry_chrI	833427	833437	+	1.49e-06	GTAAACAAAGA
S. cryophilus	cry_chrI	864130	864140	+	1.49e-06	GTAAACAAAGA
S. cryophilus	cry_chrI	1055343	1055353	-	1.49e-06	GTAAACAAAGA
S. cryophilus	cry_chrI	1127358	1127368	+	1.49e-06	GTAAACAAAGA
S. cryophilus	cry_chrI	1279818	1279828	-	1.49e-06	GTAAACAAAGA
S. cryophilus	cry_chrI	1360313	1360323	+	1.49e-06	GTAAACAAAGA
S. cryophilus	cry_chrI	1364308	1364318	+	1.49e-06	GTAAACAAAGA
S. cryophilus	cry_chrI	1542924	1542934	-	1.49e-06	GTAAACAAAGA
S. cryophilus	cry_chrI	1877981	1877991	+	1.49e-06	GTAAACAAAGA
S. cryophilus	cry_chrI	1982256	1982266	+	1.49e-06	GTAAACAAAGA
S. cryophilus	cry_chrI	2139437	2139447	-	1.49e-06	GTAAACAAAGA
S. cryophilus	cry_chrI	2221122	2221132	+	1.49e-06	GTAAACAAAGA
S. cryophilus	cry_chrI	2513697	2513707	+	1.49e-06	GTAAACAAAGA
S. cryophilus	cry_chrI	2523535	2523545	+	1.49e-06	GTAAACAAAGA
S. cryophilus	cry_chrI	2541332	2541342	-	1.49e-06	GTAAACAAAGA
S. cryophilus	cry_chrI	2869346	2869356	-	1.49e-06	GTAAACAAAGA
S. cryophilus	cry_chrI	3030022	3030032	+	1.49e-06	GTAAACAAAGA
S. cryophilus	cry_chrI	3390023	3390033	+	1.49e-06	GTAAACAAAGA
S. cryophilus	cry_chrI	3439001	3439011	+	1.49e-06	GTAAACAAAGA
S. cryophilus	cry_chrI	3549808	3549818	+	1.49e-06	GTAAACAAAGA
S. cryophilus	cry_chrI	4137542	4137552	+	1.49e-06	GTAAACAAAGA
S. cryophilus	cry_chrI	4388603	4388613	+	1.49e-06	GTAAACAAAGA
S. cryophilus	cry_chrI	4400061	4400071	+	1.49e-06	GTAAACAAAGA
S. cryophilus	cry_chrI	4449603	4449613	-	1.49e-06	GTAAACAAAGA
S. cryophilus	cry_chrI	4505410	4505420	-	1.49e-06	GTAAACAAAGA
S. cryophilus	cry_chrI	4639157	4639167	+	1.49e-06	GTAAACAAAGA
S. cryophilus	cry_chrI	26104	26114	+	1.8e-06	GTAAACAAACC
S. cryophilus	cry_chrI	213100	213110	+	1.8e-06	GTAAACAAACC
S. cryophilus	cry_chrI	311992	312002	+	1.8e-06	GTAAACAAACC
S. cryophilus	cry_chrI	321899	321909	+	1.8e-06	GTAAACAAACC
S. cryophilus	cry_chrI	410884	410894	+	1.8e-06	GTAAACAAACC
S. cryophilus	cry_chrI	531892	531902	+	1.8e-06	GTAAACAAACC
S. cryophilus	cry_chrI	930295	930305	+	1.8e-06	GTAAACAAACC
S. cryophilus	cry_chrI	1014610	1014620	+	1.8e-06	GTAAACAAACC
S. cryophilus	cry_chrI	1189209	1189219	+	1.8e-06	GTAAACAAACC
S. cryophilus	cry_chrI	1296266	1296276	+	1.8e-06	GTAAACAAACC
S. cryophilus	cry_chrI	1560901	1560911	+	1.8e-06	GTAAACAAACC
S. cryophilus	cry_chrI	1989415	1989425	+	1.8e-06	GTAAACAAACC
S. cryophilus	cry_chrI	2394476	2394486	+	1.8e-06	GTAAACAAACC
S. cryophilus	cry_chrI	2413872	2413882	+	1.8e-06	GTAAACAAACC
S. cryophilus	cry_chrI	2474701	2474711	+	1.8e-06	GTAAACAAACC
S. cryophilus	cry_chrI	2797313	2797323	+	1.8e-06	GTAAACAAACC
S. cryophilus	cry_chrI	3212389	3212399	+	1.8e-06	GTAAACAAACC
S. cryophilus	cry_chrI	3271947	3271957	+	1.8e-06	GTAAACAAACC
S. cryophilus	cry_chrI	3514259	3514269	+	1.8e-06	GTAAACAAACC
S. cryophilus	cry_chrI	3626838	3626848	+	1.8e-06	GTAAACAAACC
S. cryophilus	cry_chrI	4380513	4380523	+	1.8e-06	GTAAACAAACC
S. cryophilus	cry_chrI	4400469	4400479	+	1.8e-06	GTAAACAAACC
S. cryophilus	cry_chrI	4524806	4524816	+	1.8e-06	GTAAACAAACC
S. cryophilus	cry_chrI	4584513	4584523	+	1.8e-06	GTAAACAAACC
S. cryophilus	cry_chrI	4629752	4629762	+	1.8e-06	GTAAACAAACC
S. cryophilus	cry_chrI	4686821	4686831	+	1.8e-06	GTAAACAAACC
S. cryophilus	cry_chrI	4808476	4808486	+	1.8e-06	GTAAACAAACC
S. cryophilus	cry_chrI	49207	49217	-	1.8e-06	GTAAACAAACC
S. cryophilus	cry_chrI	435487	435497	-	1.8e-06	GTAAACAAACC
S. cryophilus	cry_chrI	491170	491180	-	1.8e-06	GTAAACAAACC
S. cryophilus	cry_chrI	500294	500304	-	1.8e-06	GTAAACAAACC
S. cryophilus	cry_chrI	1249851	1249861	-	1.8e-06	GTAAACAAACC
S. cryophilus	cry_chrI	1557183	1557193	-	1.8e-06	GTAAACAAACC
S. cryophilus	cry_chrI	1675252	1675262	-	1.8e-06	GTAAACAAACC
S. cryophilus	cry_chrI	1951674	1951684	-	1.8e-06	GTAAACAAACC
S. cryophilus	cry_chrI	2491295	2491305	-	1.8e-06	GTAAACAAACC
S. cryophilus	cry_chrI	2592095	2592105	-	1.8e-06	GTAAACAAACC
S. cryophilus	cry_chrI	2812281	2812291	-	1.8e-06	GTAAACAAACC
S. cryophilus	cry_chrI	3742575	3742585	-	1.8e-06	GTAAACAAACC
S. cryophilus	cry_chrI	3933685	3933695	-	1.8e-06	GTAAACAAACC
S. cryophilus	cry_chrI	4254942	4254952	-	1.8e-06	GTAAACAAACC
S. cryophilus	cry_chrI	4433698	4433708	-	1.8e-06	GTAAACAAACC
S. cryophilus	cry_chrI	4485194	4485204	-	1.8e-06	GTAAACAAACC
S. cryophilus	cry_chrI	4547214	4547224	-	1.8e-06	GTAAACAAACC
S. cryophilus	cry_chrI	4751687	4751697	-	1.8e-06	GTAAACAAACC
S. cryophilus	cry_chrI	4852809	4852819	-	1.8e-06	GTAAACAAACC
S. cryophilus	cry_chrI	182236	182246	+	2.25e-06	GTAAACAAATA
S. cryophilus	cry_chrI	234059	234069	-	2.25e-06	GTAAACAAATA
S. cryophilus	cry_chrI	290356	290366	-	2.25e-06	GTAAACAAATA
S. cryophilus	cry_chrI	401374	401384	-	2.25e-06	GTAAACAAATA
S. cryophilus	cry_chrI	521793	521803	-	2.25e-06	GTAAACAAATA
S. cryophilus	cry_chrI	561463	561473	-	2.25e-06	GTAAACAAATA
S. cryophilus	cry_chrI	712673	712683	-	2.25e-06	GTAAACAAATA
S. cryophilus	cry_chrI	829436	829446	+	2.25e-06	GTAAACAAATA
S. cryophilus	cry_chrI	1001953	1001963	+	2.25e-06	GTAAACAAATA
S. cryophilus	cry_chrI	1045316	1045326	-	2.25e-06	GTAAACAAATA
S. cryophilus	cry_chrI	1138461	1138471	-	2.25e-06	GTAAACAAATA
S. cryophilus	cry_chrI	1299313	1299323	+	2.25e-06	GTAAACAAATA
S. cryophilus	cry_chrI	1348795	1348805	+	2.25e-06	GTAAACAAATA
S. cryophilus	cry_chrI	1516488	1516498	+	2.25e-06	GTAAACAAATA
S. cryophilus	cry_chrI	1557737	1557747	+	2.25e-06	GTAAACAAATA
S. cryophilus	cry_chrI	1654742	1654752	+	2.25e-06	GTAAACAAATA
S. cryophilus	cry_chrI	1689596	1689606	+	2.25e-06	GTAAACAAATA
S. cryophilus	cry_chrI	1743532	1743542	+	2.25e-06	GTAAACAAATA
S. cryophilus	cry_chrI	1882426	1882436	-	2.25e-06	GTAAACAAATA
S. cryophilus	cry_chrI	1983628	1983638	-	2.25e-06	GTAAACAAATA
S. cryophilus	cry_chrI	2004786	2004796	+	2.25e-06	GTAAACAAATA
S. cryophilus	cry_chrI	2082768	2082778	-	2.25e-06	GTAAACAAATA
S. cryophilus	cry_chrI	2096393	2096403	+	2.25e-06	GTAAACAAATA
S. cryophilus	cry_chrI	2410083	2410093	-	2.25e-06	GTAAACAAATA
S. cryophilus	cry_chrI	2414126	2414136	-	2.25e-06	GTAAACAAATA
S. cryophilus	cry_chrI	2416554	2416564	+	2.25e-06	GTAAACAAATA
S. cryophilus	cry_chrI	2746585	2746595	+	2.25e-06	GTAAACAAATA
S. cryophilus	cry_chrI	2797553	2797563	+	2.25e-06	GTAAACAAATA
S. cryophilus	cry_chrI	2866574	2866584	-	2.25e-06	GTAAACAAATA
S. cryophilus	cry_chrI	3165022	3165032	-	2.25e-06	GTAAACAAATA
S. cryophilus	cry_chrI	3188536	3188546	+	2.25e-06	GTAAACAAATA
S. cryophilus	cry_chrI	3403575	3403585	+	2.25e-06	GTAAACAAATA
S. cryophilus	cry_chrI	3442633	3442643	+	2.25e-06	GTAAACAAATA
S. cryophilus	cry_chrI	3503092	3503102	+	2.25e-06	GTAAACAAATA
S. cryophilus	cry_chrI	3678148	3678158	+	2.25e-06	GTAAACAAATA
S. cryophilus	cry_chrI	3724878	3724888	+	2.25e-06	GTAAACAAATA
S. cryophilus	cry_chrI	3955918	3955928	-	2.25e-06	GTAAACAAATA
S. cryophilus	cry_chrI	3988947	3988957	-	2.25e-06	GTAAACAAATA
S. cryophilus	cry_chrI	4093025	4093035	+	2.25e-06	GTAAACAAATA
S. cryophilus	cry_chrI	4330546	4330556	-	2.25e-06	GTAAACAAATA
S. cryophilus	cry_chrI	4330841	4330851	-	2.25e-06	GTAAACAAATA
S. cryophilus	cry_chrI	4354070	4354080	-	2.25e-06	GTAAACAAATA
S. cryophilus	cry_chrI	4388918	4388928	-	2.25e-06	GTAAACAAATA
S. cryophilus	cry_chrI	4604366	4604376	+	2.25e-06	GTAAACAAATA
S. cryophilus	cry_chrI	4616096	4616106	-	2.25e-06	GTAAACAAATA
S. cryophilus	cry_chrI	102615	102625	+	2.62e-06	GAAAACAAACA
S. cryophilus	cry_chrI	266216	266226	-	2.62e-06	GAAAACAAACA
S. cryophilus	cry_chrI	654252	654262	-	2.62e-06	GAAAACAAACA
S. cryophilus	cry_chrI	835495	835505	+	2.62e-06	GAAAACAAACA
S. cryophilus	cry_chrI	887672	887682	-	2.62e-06	GAAAACAAACA
S. cryophilus	cry_chrI	905061	905071	-	2.62e-06	GAAAACAAACA
S. cryophilus	cry_chrI	931510	931520	+	2.62e-06	GAAAACAAACA
S. cryophilus	cry_chrI	1070851	1070861	+	2.62e-06	GAAAACAAACA
S. cryophilus	cry_chrI	1085707	1085717	+	2.62e-06	GAAAACAAACA
S. cryophilus	cry_chrI	1085892	1085902	+	2.62e-06	GAAAACAAACA
S. cryophilus	cry_chrI	1137651	1137661	+	2.62e-06	GAAAACAAACA
S. cryophilus	cry_chrI	1266378	1266388	+	2.62e-06	GAAAACAAACA
S. cryophilus	cry_chrI	1361021	1361031	+	2.62e-06	GAAAACAAACA
S. cryophilus	cry_chrI	1980661	1980671	+	2.62e-06	GAAAACAAACA
S. cryophilus	cry_chrI	2103633	2103643	+	2.62e-06	GAAAACAAACA
S. cryophilus	cry_chrI	2337202	2337212	+	2.62e-06	GAAAACAAACA
S. cryophilus	cry_chrI	2464438	2464448	-	2.62e-06	GAAAACAAACA
S. cryophilus	cry_chrI	2719934	2719944	-	2.62e-06	GAAAACAAACA
S. cryophilus	cry_chrI	2794918	2794928	-	2.62e-06	GAAAACAAACA
S. cryophilus	cry_chrI	3266218	3266228	-	2.62e-06	GAAAACAAACA
S. cryophilus	cry_chrI	3787333	3787343	+	2.62e-06	GAAAACAAACA
S. cryophilus	cry_chrI	3890654	3890664	+	2.62e-06	GAAAACAAACA
S. cryophilus	cry_chrI	3948840	3948850	+	2.62e-06	GAAAACAAACA
S. cryophilus	cry_chrI	4109435	4109445	-	2.62e-06	GAAAACAAACA
S. cryophilus	cry_chrI	4139508	4139518	+	2.62e-06	GAAAACAAACA
S. cryophilus	cry_chrI	4652345	4652355	-	2.62e-06	GAAAACAAACA
S. cryophilus	cry_chrI	4727655	4727665	+	2.62e-06	GAAAACAAACA
S. cryophilus	cry_chrI	553418	553428	-	2.99e-06	GTAAACAATCA
S. cryophilus	cry_chrI	797523	797533	-	2.99e-06	GTAAACAATCA
S. cryophilus	cry_chrI	1041309	1041319	-	2.99e-06	GTAAACAATCA
S. cryophilus	cry_chrI	1655628	1655638	+	2.99e-06	GTAAACAATCA
S. cryophilus	cry_chrI	1923524	1923534	-	2.99e-06	GTAAACAATCA
S. cryophilus	cry_chrI	2188781	2188791	+	2.99e-06	GTAAACAATCA
S. cryophilus	cry_chrI	2343264	2343274	-	2.99e-06	GTAAACAATCA
S. cryophilus	cry_chrI	2370372	2370382	-	2.99e-06	GTAAACAATCA
S. cryophilus	cry_chrI	3319240	3319250	-	2.99e-06	GTAAACAATCA
S. cryophilus	cry_chrI	3435197	3435207	-	2.99e-06	GTAAACAATCA
S. cryophilus	cry_chrI	3645005	3645015	+	2.99e-06	GTAAACAATCA
S. cryophilus	cry_chrI	3731300	3731310	-	2.99e-06	GTAAACAATCA
S. cryophilus	cry_chrI	3886017	3886027	+	2.99e-06	GTAAACAATCA
S. cryophilus	cry_chrI	4248575	4248585	-	2.99e-06	GTAAACAATCA
S. cryophilus	cry_chrI	4382433	4382443	+	2.99e-06	GTAAACAATCA
S. cryophilus	cry_chrII	57558	57568	+	3.7e-07	GTAAACAAACA
S. cryophilus	cry_chrII	196966	196976	+	3.7e-07	GTAAACAAACA
S. cryophilus	cry_chrII	295387	295397	-	3.7e-07	GTAAACAAACA
S. cryophilus	cry_chrII	355396	355406	+	3.7e-07	GTAAACAAACA
S. cryophilus	cry_chrII	367518	367528	-	3.7e-07	GTAAACAAACA
S. cryophilus	cry_chrII	372432	372442	-	3.7e-07	GTAAACAAACA
S. cryophilus	cry_chrII	379847	379857	-	3.7e-07	GTAAACAAACA
S. cryophilus	cry_chrII	385803	385813	-	3.7e-07	GTAAACAAACA
S. cryophilus	cry_chrII	386157	386167	+	3.7e-07	GTAAACAAACA
S. cryophilus	cry_chrII	428568	428578	+	3.7e-07	GTAAACAAACA
S. cryophilus	cry_chrII	430798	430808	-	3.7e-07	GTAAACAAACA
S. cryophilus	cry_chrII	472089	472099	-	3.7e-07	GTAAACAAACA
S. cryophilus	cry_chrII	478600	478610	-	3.7e-07	GTAAACAAACA
S. cryophilus	cry_chrII	535499	535509	-	3.7e-07	GTAAACAAACA
S. cryophilus	cry_chrII	581630	581640	+	3.7e-07	GTAAACAAACA
S. cryophilus	cry_chrII	628273	628283	-	3.7e-07	GTAAACAAACA
S. cryophilus	cry_chrII	656040	656050	-	3.7e-07	GTAAACAAACA
S. cryophilus	cry_chrII	656253	656263	-	3.7e-07	GTAAACAAACA
S. cryophilus	cry_chrII	659758	659768	+	3.7e-07	GTAAACAAACA
S. cryophilus	cry_chrII	698728	698738	-	3.7e-07	GTAAACAAACA
S. cryophilus	cry_chrII	706591	706601	-	3.7e-07	GTAAACAAACA
S. cryophilus	cry_chrII	779261	779271	-	3.7e-07	GTAAACAAACA
S. cryophilus	cry_chrII	876929	876939	-	3.7e-07	GTAAACAAACA
S. cryophilus	cry_chrII	910471	910481	-	3.7e-07	GTAAACAAACA
S. cryophilus	cry_chrII	1014407	1014417	+	3.7e-07	GTAAACAAACA
S. cryophilus	cry_chrII	1085145	1085155	+	3.7e-07	GTAAACAAACA
S. cryophilus	cry_chrII	1092400	1092410	+	3.7e-07	GTAAACAAACA
S. cryophilus	cry_chrII	1101845	1101855	-	3.7e-07	GTAAACAAACA
S. cryophilus	cry_chrII	1102280	1102290	-	3.7e-07	GTAAACAAACA
S. cryophilus	cry_chrII	1123875	1123885	+	3.7e-07	GTAAACAAACA
S. cryophilus	cry_chrII	1149066	1149076	-	3.7e-07	GTAAACAAACA
S. cryophilus	cry_chrII	1261207	1261217	-	3.7e-07	GTAAACAAACA
S. cryophilus	cry_chrII	1305199	1305209	+	3.7e-07	GTAAACAAACA
S. cryophilus	cry_chrII	1316758	1316768	-	3.7e-07	GTAAACAAACA
S. cryophilus	cry_chrII	1324670	1324680	-	3.7e-07	GTAAACAAACA
S. cryophilus	cry_chrII	1352680	1352690	-	3.7e-07	GTAAACAAACA
S. cryophilus	cry_chrII	1398370	1398380	+	3.7e-07	GTAAACAAACA
S. cryophilus	cry_chrII	1408538	1408548	-	3.7e-07	GTAAACAAACA
S. cryophilus	cry_chrII	1458445	1458455	+	3.7e-07	GTAAACAAACA
S. cryophilus	cry_chrII	1631018	1631028	-	3.7e-07	GTAAACAAACA
S. cryophilus	cry_chrII	1760100	1760110	+	3.7e-07	GTAAACAAACA
S. cryophilus	cry_chrII	1782047	1782057	+	3.7e-07	GTAAACAAACA
S. cryophilus	cry_chrII	1831906	1831916	+	3.7e-07	GTAAACAAACA
S. cryophilus	cry_chrII	1880528	1880538	+	3.7e-07	GTAAACAAACA
S. cryophilus	cry_chrII	1889059	1889069	+	3.7e-07	GTAAACAAACA
S. cryophilus	cry_chrII	1924454	1924464	+	3.7e-07	GTAAACAAACA
S. cryophilus	cry_chrII	1946331	1946341	+	3.7e-07	GTAAACAAACA
S. cryophilus	cry_chrII	1969808	1969818	-	3.7e-07	GTAAACAAACA
S. cryophilus	cry_chrII	1981934	1981944	-	3.7e-07	GTAAACAAACA
S. cryophilus	cry_chrII	2034343	2034353	-	3.7e-07	GTAAACAAACA
S. cryophilus	cry_chrII	2041594	2041604	-	3.7e-07	GTAAACAAACA
S. cryophilus	cry_chrII	2050544	2050554	+	3.7e-07	GTAAACAAACA
S. cryophilus	cry_chrII	2062192	2062202	+	3.7e-07	GTAAACAAACA
S. cryophilus	cry_chrII	2094842	2094852	-	3.7e-07	GTAAACAAACA
S. cryophilus	cry_chrII	2135223	2135233	+	3.7e-07	GTAAACAAACA
S. cryophilus	cry_chrII	2140528	2140538	+	3.7e-07	GTAAACAAACA
S. cryophilus	cry_chrII	2160480	2160490	-	3.7e-07	GTAAACAAACA
S. cryophilus	cry_chrII	2178544	2178554	-	3.7e-07	GTAAACAAACA
S. cryophilus	cry_chrII	2253359	2253369	-	3.7e-07	GTAAACAAACA
S. cryophilus	cry_chrII	2369967	2369977	-	3.7e-07	GTAAACAAACA
S. cryophilus	cry_chrII	2420000	2420010	-	3.7e-07	GTAAACAAACA
S. cryophilus	cry_chrII	2516679	2516689	-	3.7e-07	GTAAACAAACA
S. cryophilus	cry_chrII	2522883	2522893	+	3.7e-07	GTAAACAAACA
S. cryophilus	cry_chrII	2537191	2537201	+	3.7e-07	GTAAACAAACA
S. cryophilus	cry_chrII	2565546	2565556	+	3.7e-07	GTAAACAAACA
S. cryophilus	cry_chrII	2565564	2565574	-	3.7e-07	GTAAACAAACA
S. cryophilus	cry_chrII	2619453	2619463	+	3.7e-07	GTAAACAAACA
S. cryophilus	cry_chrII	2661751	2661761	+	3.7e-07	GTAAACAAACA
S. cryophilus	cry_chrII	2674026	2674036	-	3.7e-07	GTAAACAAACA
S. cryophilus	cry_chrII	2679070	2679080	+	3.7e-07	GTAAACAAACA
S. cryophilus	cry_chrII	2856052	2856062	+	3.7e-07	GTAAACAAACA
S. cryophilus	cry_chrII	2856069	2856079	-	3.7e-07	GTAAACAAACA
S. cryophilus	cry_chrII	2888751	2888761	+	3.7e-07	GTAAACAAACA
S. cryophilus	cry_chrII	2936667	2936677	+	3.7e-07	GTAAACAAACA
S. cryophilus	cry_chrII	2971893	2971903	-	3.7e-07	GTAAACAAACA
S. cryophilus	cry_chrII	3193412	3193422	-	3.7e-07	GTAAACAAACA
S. cryophilus	cry_chrII	3319828	3319838	-	3.7e-07	GTAAACAAACA
S. cryophilus	cry_chrII	3347310	3347320	-	3.7e-07	GTAAACAAACA
S. cryophilus	cry_chrII	3357082	3357092	-	3.7e-07	GTAAACAAACA
S. cryophilus	cry_chrII	3365891	3365901	-	3.7e-07	GTAAACAAACA
S. cryophilus	cry_chrII	3469329	3469339	-	3.7e-07	GTAAACAAACA
S. cryophilus	cry_chrII	3544028	3544038	-	3.7e-07	GTAAACAAACA
S. cryophilus	cry_chrII	3565378	3565388	-	3.7e-07	GTAAACAAACA
S. cryophilus	cry_chrII	3612442	3612452	+	3.7e-07	GTAAACAAACA
S. cryophilus	cry_chrII	3617126	3617136	+	3.7e-07	GTAAACAAACA
S. cryophilus	cry_chrII	3627791	3627801	+	3.7e-07	GTAAACAAACA
S. cryophilus	cry_chrII	3682115	3682125	-	3.7e-07	GTAAACAAACA
S. cryophilus	cry_chrII	3698139	3698149	+	3.7e-07	GTAAACAAACA
S. cryophilus	cry_chrII	3722773	3722783	+	3.7e-07	GTAAACAAACA
S. cryophilus	cry_chrII	3723767	3723777	-	3.7e-07	GTAAACAAACA
S. cryophilus	cry_chrII	3766591	3766601	-	3.7e-07	GTAAACAAACA
S. cryophilus	cry_chrII	3809477	3809487	-	3.7e-07	GTAAACAAACA
S. cryophilus	cry_chrII	3824881	3824891	+	3.7e-07	GTAAACAAACA
S. cryophilus	cry_chrII	3832413	3832423	-	3.7e-07	GTAAACAAACA
S. cryophilus	cry_chrII	3861036	3861046	+	3.7e-07	GTAAACAAACA
S. cryophilus	cry_chrII	3887200	3887210	-	3.7e-07	GTAAACAAACA
S. cryophilus	cry_chrII	164020	164030	+	6.74e-07	GTAAACAAACG
S. cryophilus	cry_chrII	274958	274968	+	6.74e-07	GTAAACAAACG
S. cryophilus	cry_chrII	346921	346931	-	6.74e-07	GTAAACAAACG
S. cryophilus	cry_chrII	431866	431876	-	6.74e-07	GTAAACAAACG
S. cryophilus	cry_chrII	531557	531567	+	6.74e-07	GTAAACAAACG
S. cryophilus	cry_chrII	929491	929501	-	6.74e-07	GTAAACAAACG
S. cryophilus	cry_chrII	997385	997395	+	6.74e-07	GTAAACAAACG
S. cryophilus	cry_chrII	1237408	1237418	+	6.74e-07	GTAAACAAACG
S. cryophilus	cry_chrII	1274278	1274288	-	6.74e-07	GTAAACAAACG
S. cryophilus	cry_chrII	1563230	1563240	+	6.74e-07	GTAAACAAACG
S. cryophilus	cry_chrII	1596523	1596533	-	6.74e-07	GTAAACAAACG
S. cryophilus	cry_chrII	1630515	1630525	-	6.74e-07	GTAAACAAACG
S. cryophilus	cry_chrII	1756863	1756873	+	6.74e-07	GTAAACAAACG
S. cryophilus	cry_chrII	1760214	1760224	-	6.74e-07	GTAAACAAACG
S. cryophilus	cry_chrII	1873523	1873533	-	6.74e-07	GTAAACAAACG
S. cryophilus	cry_chrII	2305893	2305903	-	6.74e-07	GTAAACAAACG
S. cryophilus	cry_chrII	2389078	2389088	-	6.74e-07	GTAAACAAACG
S. cryophilus	cry_chrII	2731760	2731770	+	6.74e-07	GTAAACAAACG
S. cryophilus	cry_chrII	2737782	2737792	-	6.74e-07	GTAAACAAACG
S. cryophilus	cry_chrII	2834368	2834378	-	6.74e-07	GTAAACAAACG
S. cryophilus	cry_chrII	2886280	2886290	-	6.74e-07	GTAAACAAACG
S. cryophilus	cry_chrII	3185257	3185267	-	6.74e-07	GTAAACAAACG
S. cryophilus	cry_chrII	3254588	3254598	-	6.74e-07	GTAAACAAACG
S. cryophilus	cry_chrII	3265506	3265516	+	6.74e-07	GTAAACAAACG
S. cryophilus	cry_chrII	3271861	3271871	-	6.74e-07	GTAAACAAACG
S. cryophilus	cry_chrII	3313033	3313043	+	6.74e-07	GTAAACAAACG
S. cryophilus	cry_chrII	3461761	3461771	+	6.74e-07	GTAAACAAACG
S. cryophilus	cry_chrII	3762469	3762479	+	6.74e-07	GTAAACAAACG
S. cryophilus	cry_chrII	3813911	3813921	-	6.74e-07	GTAAACAAACG
S. cryophilus	cry_chrII	3947731	3947741	-	6.74e-07	GTAAACAAACG
S. cryophilus	cry_chrII	6723	6733	+	1.12e-06	ATAAACAAACA
S. cryophilus	cry_chrII	20746	20756	+	1.12e-06	ATAAACAAACA
S. cryophilus	cry_chrII	62539	62549	+	1.12e-06	ATAAACAAACA
S. cryophilus	cry_chrII	179258	179268	+	1.12e-06	ATAAACAAACA
S. cryophilus	cry_chrII	225675	225685	-	1.12e-06	ATAAACAAACA
S. cryophilus	cry_chrII	249571	249581	+	1.12e-06	ATAAACAAACA
S. cryophilus	cry_chrII	277658	277668	+	1.12e-06	ATAAACAAACA
S. cryophilus	cry_chrII	312084	312094	+	1.12e-06	ATAAACAAACA
S. cryophilus	cry_chrII	448618	448628	+	1.12e-06	ATAAACAAACA
S. cryophilus	cry_chrII	659488	659498	+	1.12e-06	ATAAACAAACA
S. cryophilus	cry_chrII	765460	765470	+	1.12e-06	ATAAACAAACA
S. cryophilus	cry_chrII	809733	809743	-	1.12e-06	ATAAACAAACA
S. cryophilus	cry_chrII	865751	865761	+	1.12e-06	ATAAACAAACA
S. cryophilus	cry_chrII	886356	886366	+	1.12e-06	ATAAACAAACA
S. cryophilus	cry_chrII	898492	898502	+	1.12e-06	ATAAACAAACA
S. cryophilus	cry_chrII	908246	908256	-	1.12e-06	ATAAACAAACA
S. cryophilus	cry_chrII	933707	933717	-	1.12e-06	ATAAACAAACA
S. cryophilus	cry_chrII	939418	939428	-	1.12e-06	ATAAACAAACA
S. cryophilus	cry_chrII	1004338	1004348	-	1.12e-06	ATAAACAAACA
S. cryophilus	cry_chrII	1007216	1007226	+	1.12e-06	ATAAACAAACA
S. cryophilus	cry_chrII	1102875	1102885	+	1.12e-06	ATAAACAAACA
S. cryophilus	cry_chrII	1209652	1209662	-	1.12e-06	ATAAACAAACA
S. cryophilus	cry_chrII	1257402	1257412	-	1.12e-06	ATAAACAAACA
S. cryophilus	cry_chrII	1389691	1389701	+	1.12e-06	ATAAACAAACA
S. cryophilus	cry_chrII	1509895	1509905	-	1.12e-06	ATAAACAAACA
S. cryophilus	cry_chrII	1570856	1570866	+	1.12e-06	ATAAACAAACA
S. cryophilus	cry_chrII	1589937	1589947	-	1.12e-06	ATAAACAAACA
S. cryophilus	cry_chrII	1879518	1879528	+	1.12e-06	ATAAACAAACA
S. cryophilus	cry_chrII	1894234	1894244	+	1.12e-06	ATAAACAAACA
S. cryophilus	cry_chrII	1928466	1928476	-	1.12e-06	ATAAACAAACA
S. cryophilus	cry_chrII	1966339	1966349	+	1.12e-06	ATAAACAAACA
S. cryophilus	cry_chrII	2024808	2024818	-	1.12e-06	ATAAACAAACA
S. cryophilus	cry_chrII	2199136	2199146	+	1.12e-06	ATAAACAAACA
S. cryophilus	cry_chrII	2250690	2250700	-	1.12e-06	ATAAACAAACA
S. cryophilus	cry_chrII	2308531	2308541	-	1.12e-06	ATAAACAAACA
S. cryophilus	cry_chrII	2317224	2317234	+	1.12e-06	ATAAACAAACA
S. cryophilus	cry_chrII	2516644	2516654	-	1.12e-06	ATAAACAAACA
S. cryophilus	cry_chrII	2543244	2543254	-	1.12e-06	ATAAACAAACA
S. cryophilus	cry_chrII	2544550	2544560	+	1.12e-06	ATAAACAAACA
S. cryophilus	cry_chrII	2550880	2550890	-	1.12e-06	ATAAACAAACA
S. cryophilus	cry_chrII	2679155	2679165	-	1.12e-06	ATAAACAAACA
S. cryophilus	cry_chrII	2879381	2879391	+	1.12e-06	ATAAACAAACA
S. cryophilus	cry_chrII	2950217	2950227	-	1.12e-06	ATAAACAAACA
S. cryophilus	cry_chrII	2969867	2969877	-	1.12e-06	ATAAACAAACA
S. cryophilus	cry_chrII	3279380	3279390	+	1.12e-06	ATAAACAAACA
S. cryophilus	cry_chrII	3307976	3307986	-	1.12e-06	ATAAACAAACA
S. cryophilus	cry_chrII	3380760	3380770	-	1.12e-06	ATAAACAAACA
S. cryophilus	cry_chrII	3393928	3393938	-	1.12e-06	ATAAACAAACA
S. cryophilus	cry_chrII	3460357	3460367	+	1.12e-06	ATAAACAAACA
S. cryophilus	cry_chrII	3486285	3486295	-	1.12e-06	ATAAACAAACA
S. cryophilus	cry_chrII	3505070	3505080	+	1.12e-06	ATAAACAAACA
S. cryophilus	cry_chrII	3506875	3506885	-	1.12e-06	ATAAACAAACA
S. cryophilus	cry_chrII	3609955	3609965	+	1.12e-06	ATAAACAAACA
S. cryophilus	cry_chrII	3613881	3613891	+	1.12e-06	ATAAACAAACA
S. cryophilus	cry_chrII	3744555	3744565	-	1.12e-06	ATAAACAAACA
S. cryophilus	cry_chrII	3824038	3824048	-	1.12e-06	ATAAACAAACA
S. cryophilus	cry_chrII	3856413	3856423	-	1.12e-06	ATAAACAAACA
S. cryophilus	cry_chrII	3897220	3897230	-	1.12e-06	ATAAACAAACA
S. cryophilus	cry_chrII	3897286	3897296	+	1.12e-06	ATAAACAAACA
S. cryophilus	cry_chrII	3897400	3897410	-	1.12e-06	ATAAACAAACA
S. cryophilus	cry_chrII	3974683	3974693	+	1.12e-06	ATAAACAAACA
S. cryophilus	cry_chrII	318762	318772	+	1.49e-06	GTAAACAAAGA
S. cryophilus	cry_chrII	367844	367854	+	1.49e-06	GTAAACAAAGA
S. cryophilus	cry_chrII	370425	370435	+	1.49e-06	GTAAACAAAGA
S. cryophilus	cry_chrII	750617	750627	-	1.49e-06	GTAAACAAAGA
S. cryophilus	cry_chrII	799910	799920	-	1.49e-06	GTAAACAAAGA
S. cryophilus	cry_chrII	838417	838427	-	1.49e-06	GTAAACAAAGA
S. cryophilus	cry_chrII	922979	922989	-	1.49e-06	GTAAACAAAGA
S. cryophilus	cry_chrII	1248416	1248426	-	1.49e-06	GTAAACAAAGA
S. cryophilus	cry_chrII	1296830	1296840	-	1.49e-06	GTAAACAAAGA
S. cryophilus	cry_chrII	1616919	1616929	-	1.49e-06	GTAAACAAAGA
S. cryophilus	cry_chrII	1726617	1726627	+	1.49e-06	GTAAACAAAGA
S. cryophilus	cry_chrII	2049548	2049558	-	1.49e-06	GTAAACAAAGA
S. cryophilus	cry_chrII	2049939	2049949	-	1.49e-06	GTAAACAAAGA
S. cryophilus	cry_chrII	2286217	2286227	-	1.49e-06	GTAAACAAAGA
S. cryophilus	cry_chrII	2357889	2357899	+	1.49e-06	GTAAACAAAGA
S. cryophilus	cry_chrII	2672639	2672649	+	1.49e-06	GTAAACAAAGA
S. cryophilus	cry_chrII	2893101	2893111	-	1.49e-06	GTAAACAAAGA
S. cryophilus	cry_chrII	2899233	2899243	+	1.49e-06	GTAAACAAAGA
S. cryophilus	cry_chrII	2943082	2943092	+	1.49e-06	GTAAACAAAGA
S. cryophilus	cry_chrII	3040609	3040619	+	1.49e-06	GTAAACAAAGA
S. cryophilus	cry_chrII	3072349	3072359	+	1.49e-06	GTAAACAAAGA
S. cryophilus	cry_chrII	3120620	3120630	-	1.49e-06	GTAAACAAAGA
S. cryophilus	cry_chrII	3142164	3142174	+	1.49e-06	GTAAACAAAGA
S. cryophilus	cry_chrII	3311411	3311421	+	1.49e-06	GTAAACAAAGA
S. cryophilus	cry_chrII	3554659	3554669	+	1.49e-06	GTAAACAAAGA
S. cryophilus	cry_chrII	3601314	3601324	+	1.49e-06	GTAAACAAAGA
S. cryophilus	cry_chrII	3867483	3867493	-	1.49e-06	GTAAACAAAGA
S. cryophilus	cry_chrII	178106	178116	+	1.8e-06	GTAAACAAACC
S. cryophilus	cry_chrII	338816	338826	+	1.8e-06	GTAAACAAACC
S. cryophilus	cry_chrII	537732	537742	+	1.8e-06	GTAAACAAACC
S. cryophilus	cry_chrII	1183936	1183946	+	1.8e-06	GTAAACAAACC
S. cryophilus	cry_chrII	1249043	1249053	+	1.8e-06	GTAAACAAACC
S. cryophilus	cry_chrII	1277343	1277353	+	1.8e-06	GTAAACAAACC
S. cryophilus	cry_chrII	1335491	1335501	+	1.8e-06	GTAAACAAACC
S. cryophilus	cry_chrII	1879616	1879626	+	1.8e-06	GTAAACAAACC
S. cryophilus	cry_chrII	2187075	2187085	+	1.8e-06	GTAAACAAACC
S. cryophilus	cry_chrII	2410858	2410868	+	1.8e-06	GTAAACAAACC
S. cryophilus	cry_chrII	2427797	2427807	+	1.8e-06	GTAAACAAACC
S. cryophilus	cry_chrII	2529157	2529167	+	1.8e-06	GTAAACAAACC
S. cryophilus	cry_chrII	3095935	3095945	+	1.8e-06	GTAAACAAACC
S. cryophilus	cry_chrII	3119375	3119385	+	1.8e-06	GTAAACAAACC
S. cryophilus	cry_chrII	3171789	3171799	+	1.8e-06	GTAAACAAACC
S. cryophilus	cry_chrII	3221363	3221373	+	1.8e-06	GTAAACAAACC
S. cryophilus	cry_chrII	3397854	3397864	+	1.8e-06	GTAAACAAACC
S. cryophilus	cry_chrII	3770860	3770870	+	1.8e-06	GTAAACAAACC
S. cryophilus	cry_chrII	64497	64507	-	1.8e-06	GTAAACAAACC
S. cryophilus	cry_chrII	400640	400650	-	1.8e-06	GTAAACAAACC
S. cryophilus	cry_chrII	479057	479067	-	1.8e-06	GTAAACAAACC
S. cryophilus	cry_chrII	698128	698138	-	1.8e-06	GTAAACAAACC
S. cryophilus	cry_chrII	770079	770089	-	1.8e-06	GTAAACAAACC
S. cryophilus	cry_chrII	895146	895156	-	1.8e-06	GTAAACAAACC
S. cryophilus	cry_chrII	1305547	1305557	-	1.8e-06	GTAAACAAACC
S. cryophilus	cry_chrII	1729957	1729967	-	1.8e-06	GTAAACAAACC
S. cryophilus	cry_chrII	1820678	1820688	-	1.8e-06	GTAAACAAACC
S. cryophilus	cry_chrII	1934617	1934627	-	1.8e-06	GTAAACAAACC
S. cryophilus	cry_chrII	2015928	2015938	-	1.8e-06	GTAAACAAACC
S. cryophilus	cry_chrII	2146053	2146063	-	1.8e-06	GTAAACAAACC
S. cryophilus	cry_chrII	2279802	2279812	-	1.8e-06	GTAAACAAACC
S. cryophilus	cry_chrII	2342715	2342725	-	1.8e-06	GTAAACAAACC
S. cryophilus	cry_chrII	2374298	2374308	-	1.8e-06	GTAAACAAACC
S. cryophilus	cry_chrII	2544420	2544430	-	1.8e-06	GTAAACAAACC
S. cryophilus	cry_chrII	2558129	2558139	-	1.8e-06	GTAAACAAACC
S. cryophilus	cry_chrII	3292839	3292849	-	1.8e-06	GTAAACAAACC
S. cryophilus	cry_chrII	3594039	3594049	-	1.8e-06	GTAAACAAACC
S. cryophilus	cry_chrII	3870116	3870126	-	1.8e-06	GTAAACAAACC
S. cryophilus	cry_chrII	20389	20399	+	2.25e-06	GTAAACAAATA
S. cryophilus	cry_chrII	100099	100109	+	2.25e-06	GTAAACAAATA
S. cryophilus	cry_chrII	144009	144019	+	2.25e-06	GTAAACAAATA
S. cryophilus	cry_chrII	157433	157443	+	2.25e-06	GTAAACAAATA
S. cryophilus	cry_chrII	241054	241064	-	2.25e-06	GTAAACAAATA
S. cryophilus	cry_chrII	299363	299373	+	2.25e-06	GTAAACAAATA
S. cryophilus	cry_chrII	372394	372404	-	2.25e-06	GTAAACAAATA
S. cryophilus	cry_chrII	419710	419720	+	2.25e-06	GTAAACAAATA
S. cryophilus	cry_chrII	448694	448704	+	2.25e-06	GTAAACAAATA
S. cryophilus	cry_chrII	508753	508763	-	2.25e-06	GTAAACAAATA
S. cryophilus	cry_chrII	750335	750345	-	2.25e-06	GTAAACAAATA
S. cryophilus	cry_chrII	821204	821214	-	2.25e-06	GTAAACAAATA
S. cryophilus	cry_chrII	895221	895231	-	2.25e-06	GTAAACAAATA
S. cryophilus	cry_chrII	1014301	1014311	-	2.25e-06	GTAAACAAATA
S. cryophilus	cry_chrII	1074487	1074497	+	2.25e-06	GTAAACAAATA
S. cryophilus	cry_chrII	1225234	1225244	-	2.25e-06	GTAAACAAATA
S. cryophilus	cry_chrII	1249126	1249136	+	2.25e-06	GTAAACAAATA
S. cryophilus	cry_chrII	1307875	1307885	+	2.25e-06	GTAAACAAATA
S. cryophilus	cry_chrII	1314032	1314042	-	2.25e-06	GTAAACAAATA
S. cryophilus	cry_chrII	1665791	1665801	-	2.25e-06	GTAAACAAATA
S. cryophilus	cry_chrII	1679236	1679246	-	2.25e-06	GTAAACAAATA
S. cryophilus	cry_chrII	1924626	1924636	+	2.25e-06	GTAAACAAATA
S. cryophilus	cry_chrII	2093656	2093666	-	2.25e-06	GTAAACAAATA
S. cryophilus	cry_chrII	2194404	2194414	-	2.25e-06	GTAAACAAATA
S. cryophilus	cry_chrII	2301656	2301666	-	2.25e-06	GTAAACAAATA
S. cryophilus	cry_chrII	2400326	2400336	-	2.25e-06	GTAAACAAATA
S. cryophilus	cry_chrII	2588723	2588733	-	2.25e-06	GTAAACAAATA
S. cryophilus	cry_chrII	2613656	2613666	+	2.25e-06	GTAAACAAATA
S. cryophilus	cry_chrII	2669959	2669969	+	2.25e-06	GTAAACAAATA
S. cryophilus	cry_chrII	2951820	2951830	-	2.25e-06	GTAAACAAATA
S. cryophilus	cry_chrII	3119392	3119402	-	2.25e-06	GTAAACAAATA
S. cryophilus	cry_chrII	3428822	3428832	+	2.25e-06	GTAAACAAATA
S. cryophilus	cry_chrII	3508739	3508749	+	2.25e-06	GTAAACAAATA
S. cryophilus	cry_chrII	3573370	3573380	+	2.25e-06	GTAAACAAATA
S. cryophilus	cry_chrII	3660806	3660816	+	2.25e-06	GTAAACAAATA
S. cryophilus	cry_chrII	3737816	3737826	-	2.25e-06	GTAAACAAATA
S. cryophilus	cry_chrII	3745399	3745409	-	2.25e-06	GTAAACAAATA
S. cryophilus	cry_chrII	78323	78333	+	2.62e-06	GAAAACAAACA
S. cryophilus	cry_chrII	217137	217147	-	2.62e-06	GAAAACAAACA
S. cryophilus	cry_chrII	303399	303409	+	2.62e-06	GAAAACAAACA
S. cryophilus	cry_chrII	446965	446975	+	2.62e-06	GAAAACAAACA
S. cryophilus	cry_chrII	559323	559333	+	2.62e-06	GAAAACAAACA
S. cryophilus	cry_chrII	717234	717244	+	2.62e-06	GAAAACAAACA
S. cryophilus	cry_chrII	983994	984004	-	2.62e-06	GAAAACAAACA
S. cryophilus	cry_chrII	1136096	1136106	+	2.62e-06	GAAAACAAACA
S. cryophilus	cry_chrII	1157181	1157191	+	2.62e-06	GAAAACAAACA
S. cryophilus	cry_chrII	1165313	1165323	+	2.62e-06	GAAAACAAACA
S. cryophilus	cry_chrII	1311110	1311120	+	2.62e-06	GAAAACAAACA
S. cryophilus	cry_chrII	1355153	1355163	+	2.62e-06	GAAAACAAACA
S. cryophilus	cry_chrII	1389798	1389808	-	2.62e-06	GAAAACAAACA
S. cryophilus	cry_chrII	1559732	1559742	+	2.62e-06	GAAAACAAACA
S. cryophilus	cry_chrII	1852763	1852773	-	2.62e-06	GAAAACAAACA
S. cryophilus	cry_chrII	1950290	1950300	+	2.62e-06	GAAAACAAACA
S. cryophilus	cry_chrII	1995814	1995824	-	2.62e-06	GAAAACAAACA
S. cryophilus	cry_chrII	2341992	2342002	-	2.62e-06	GAAAACAAACA
S. cryophilus	cry_chrII	2414983	2414993	-	2.62e-06	GAAAACAAACA
S. cryophilus	cry_chrII	2445435	2445445	-	2.62e-06	GAAAACAAACA
S. cryophilus	cry_chrII	2566727	2566737	+	2.62e-06	GAAAACAAACA
S. cryophilus	cry_chrII	2928491	2928501	+	2.62e-06	GAAAACAAACA
S. cryophilus	cry_chrII	3041209	3041219	+	2.62e-06	GAAAACAAACA
S. cryophilus	cry_chrII	3247031	3247041	-	2.62e-06	GAAAACAAACA
S. cryophilus	cry_chrII	3247363	3247373	+	2.62e-06	GAAAACAAACA
S. cryophilus	cry_chrII	3299907	3299917	+	2.62e-06	GAAAACAAACA
S. cryophilus	cry_chrII	3302804	3302814	+	2.62e-06	GAAAACAAACA
S. cryophilus	cry_chrII	3448584	3448594	-	2.62e-06	GAAAACAAACA
S. cryophilus	cry_chrII	3829561	3829571	-	2.62e-06	GAAAACAAACA
S. cryophilus	cry_chrII	127576	127586	+	2.99e-06	GTAAACAATCA
S. cryophilus	cry_chrII	765710	765720	-	2.99e-06	GTAAACAATCA
S. cryophilus	cry_chrII	892302	892312	-	2.99e-06	GTAAACAATCA
S. cryophilus	cry_chrII	1068057	1068067	-	2.99e-06	GTAAACAATCA
S. cryophilus	cry_chrII	1744688	1744698	+	2.99e-06	GTAAACAATCA
S. cryophilus	cry_chrII	1840074	1840084	+	2.99e-06	GTAAACAATCA
S. cryophilus	cry_chrII	2100527	2100537	-	2.99e-06	GTAAACAATCA
S. cryophilus	cry_chrII	2338791	2338801	+	2.99e-06	GTAAACAATCA
S. cryophilus	cry_chrII	2386448	2386458	+	2.99e-06	GTAAACAATCA
S. cryophilus	cry_chrII	2979155	2979165	-	2.99e-06	GTAAACAATCA
S. cryophilus	cry_chrII	2992752	2992762	+	2.99e-06	GTAAACAATCA
S. cryophilus	cry_chrII	3047079	3047089	+	2.99e-06	GTAAACAATCA
S. cryophilus	cry_chrII	3136490	3136500	+	2.99e-06	GTAAACAATCA
S. cryophilus	cry_chrII	3182662	3182672	-	2.99e-06	GTAAACAATCA
S. cryophilus	cry_chrII	3259833	3259843	-	2.99e-06	GTAAACAATCA
S. cryophilus	cry_chrII	3345683	3345693	-	2.99e-06	GTAAACAATCA
S. cryophilus	cry_chrII	3359472	3359482	-	2.99e-06	GTAAACAATCA
S. cryophilus	cry_chrIII	24976	24986	+	3.7e-07	GTAAACAAACA
S. cryophilus	cry_chrIII	42499	42509	+	3.7e-07	GTAAACAAACA
S. cryophilus	cry_chrIII	63572	63582	+	3.7e-07	GTAAACAAACA
S. cryophilus	cry_chrIII	122719	122729	-	3.7e-07	GTAAACAAACA
S. cryophilus	cry_chrIII	136613	136623	+	3.7e-07	GTAAACAAACA
S. cryophilus	cry_chrIII	165232	165242	-	3.7e-07	GTAAACAAACA
S. cryophilus	cry_chrIII	180861	180871	+	3.7e-07	GTAAACAAACA
S. cryophilus	cry_chrIII	268356	268366	+	3.7e-07	GTAAACAAACA
S. cryophilus	cry_chrIII	278472	278482	+	3.7e-07	GTAAACAAACA
S. cryophilus	cry_chrIII	339280	339290	+	3.7e-07	GTAAACAAACA
S. cryophilus	cry_chrIII	362977	362987	+	3.7e-07	GTAAACAAACA
S. cryophilus	cry_chrIII	435771	435781	-	3.7e-07	GTAAACAAACA
S. cryophilus	cry_chrIII	529891	529901	-	3.7e-07	GTAAACAAACA
S. cryophilus	cry_chrIII	552870	552880	-	3.7e-07	GTAAACAAACA
S. cryophilus	cry_chrIII	596200	596210	-	3.7e-07	GTAAACAAACA
S. cryophilus	cry_chrIII	663421	663431	+	3.7e-07	GTAAACAAACA
S. cryophilus	cry_chrIII	718619	718629	+	3.7e-07	GTAAACAAACA
S. cryophilus	cry_chrIII	842830	842840	-	3.7e-07	GTAAACAAACA
S. cryophilus	cry_chrIII	857229	857239	-	3.7e-07	GTAAACAAACA
S. cryophilus	cry_chrIII	893309	893319	+	3.7e-07	GTAAACAAACA
S. cryophilus	cry_chrIII	1034202	1034212	-	3.7e-07	GTAAACAAACA
S. cryophilus	cry_chrIII	1057236	1057246	+	3.7e-07	GTAAACAAACA
S. cryophilus	cry_chrIII	1129383	1129393	+	3.7e-07	GTAAACAAACA
S. cryophilus	cry_chrIII	1153193	1153203	-	3.7e-07	GTAAACAAACA
S. cryophilus	cry_chrIII	1249767	1249777	+	3.7e-07	GTAAACAAACA
S. cryophilus	cry_chrIII	1277550	1277560	-	3.7e-07	GTAAACAAACA
S. cryophilus	cry_chrIII	1352588	1352598	+	3.7e-07	GTAAACAAACA
S. cryophilus	cry_chrIII	1740534	1740544	+	3.7e-07	GTAAACAAACA
S. cryophilus	cry_chrIII	1923397	1923407	+	3.7e-07	GTAAACAAACA
S. cryophilus	cry_chrIII	2004527	2004537	-	3.7e-07	GTAAACAAACA
S. cryophilus	cry_chrIII	2059744	2059754	+	3.7e-07	GTAAACAAACA
S. cryophilus	cry_chrIII	2060826	2060836	+	3.7e-07	GTAAACAAACA
S. cryophilus	cry_chrIII	2086278	2086288	-	3.7e-07	GTAAACAAACA
S. cryophilus	cry_chrIII	2194205	2194215	-	3.7e-07	GTAAACAAACA
S. cryophilus	cry_chrIII	2194290	2194300	-	3.7e-07	GTAAACAAACA
S. cryophilus	cry_chrIII	2199055	2199065	-	3.7e-07	GTAAACAAACA
S. cryophilus	cry_chrIII	2223515	2223525	+	3.7e-07	GTAAACAAACA
S. cryophilus	cry_chrIII	2281327	2281337	+	3.7e-07	GTAAACAAACA
S. cryophilus	cry_chrIII	2374841	2374851	-	3.7e-07	GTAAACAAACA
S. cryophilus	cry_chrIII	2384826	2384836	+	3.7e-07	GTAAACAAACA
S. cryophilus	cry_chrIII	2394201	2394211	-	3.7e-07	GTAAACAAACA
S. cryophilus	cry_chrIII	2394349	2394359	+	3.7e-07	GTAAACAAACA
S. cryophilus	cry_chrIII	2456991	2457001	-	3.7e-07	GTAAACAAACA
S. cryophilus	cry_chrIII	2460341	2460351	-	3.7e-07	GTAAACAAACA
S. cryophilus	cry_chrIII	2460581	2460591	-	3.7e-07	GTAAACAAACA
S. cryophilus	cry_chrIII	2469078	2469088	-	3.7e-07	GTAAACAAACA
S. cryophilus	cry_chrIII	2574524	2574534	+	3.7e-07	GTAAACAAACA
S. cryophilus	cry_chrIII	2637278	2637288	+	3.7e-07	GTAAACAAACA
S. cryophilus	cry_chrIII	2656666	2656676	+	3.7e-07	GTAAACAAACA
S. cryophilus	cry_chrIII	2683087	2683097	+	3.7e-07	GTAAACAAACA
S. cryophilus	cry_chrIII	2690926	2690936	-	3.7e-07	GTAAACAAACA
S. cryophilus	cry_chrIII	2703754	2703764	-	3.7e-07	GTAAACAAACA
S. cryophilus	cry_chrIII	2743461	2743471	+	3.7e-07	GTAAACAAACA
S. cryophilus	cry_chrIII	2748142	2748152	+	3.7e-07	GTAAACAAACA
S. cryophilus	cry_chrIII	394572	394582	-	6.74e-07	GTAAACAAACG
S. cryophilus	cry_chrIII	697174	697184	+	6.74e-07	GTAAACAAACG
S. cryophilus	cry_chrIII	814825	814835	+	6.74e-07	GTAAACAAACG
S. cryophilus	cry_chrIII	920867	920877	-	6.74e-07	GTAAACAAACG
S. cryophilus	cry_chrIII	975496	975506	-	6.74e-07	GTAAACAAACG
S. cryophilus	cry_chrIII	1177556	1177566	-	6.74e-07	GTAAACAAACG
S. cryophilus	cry_chrIII	1219948	1219958	-	6.74e-07	GTAAACAAACG
S. cryophilus	cry_chrIII	1258423	1258433	-	6.74e-07	GTAAACAAACG
S. cryophilus	cry_chrIII	1268223	1268233	+	6.74e-07	GTAAACAAACG
S. cryophilus	cry_chrIII	1359688	1359698	-	6.74e-07	GTAAACAAACG
S. cryophilus	cry_chrIII	1379763	1379773	+	6.74e-07	GTAAACAAACG
S. cryophilus	cry_chrIII	1485390	1485400	-	6.74e-07	GTAAACAAACG
S. cryophilus	cry_chrIII	1605947	1605957	-	6.74e-07	GTAAACAAACG
S. cryophilus	cry_chrIII	1624265	1624275	-	6.74e-07	GTAAACAAACG
S. cryophilus	cry_chrIII	1628354	1628364	-	6.74e-07	GTAAACAAACG
S. cryophilus	cry_chrIII	1832405	1832415	-	6.74e-07	GTAAACAAACG
S. cryophilus	cry_chrIII	1968635	1968645	-	6.74e-07	GTAAACAAACG
S. cryophilus	cry_chrIII	2086752	2086762	-	6.74e-07	GTAAACAAACG
S. cryophilus	cry_chrIII	2231419	2231429	-	6.74e-07	GTAAACAAACG
S. cryophilus	cry_chrIII	2431169	2431179	-	6.74e-07	GTAAACAAACG
S. cryophilus	cry_chrIII	24909	24919	-	1.12e-06	ATAAACAAACA
S. cryophilus	cry_chrIII	82917	82927	-	1.12e-06	ATAAACAAACA
S. cryophilus	cry_chrIII	137270	137280	-	1.12e-06	ATAAACAAACA
S. cryophilus	cry_chrIII	137652	137662	-	1.12e-06	ATAAACAAACA
S. cryophilus	cry_chrIII	180224	180234	+	1.12e-06	ATAAACAAACA
S. cryophilus	cry_chrIII	225166	225176	-	1.12e-06	ATAAACAAACA
S. cryophilus	cry_chrIII	471701	471711	-	1.12e-06	ATAAACAAACA
S. cryophilus	cry_chrIII	527285	527295	-	1.12e-06	ATAAACAAACA
S. cryophilus	cry_chrIII	756558	756568	-	1.12e-06	ATAAACAAACA
S. cryophilus	cry_chrIII	868846	868856	+	1.12e-06	ATAAACAAACA
S. cryophilus	cry_chrIII	1047938	1047948	-	1.12e-06	ATAAACAAACA
S. cryophilus	cry_chrIII	1069845	1069855	-	1.12e-06	ATAAACAAACA
S. cryophilus	cry_chrIII	1261468	1261478	+	1.12e-06	ATAAACAAACA
S. cryophilus	cry_chrIII	1335236	1335246	+	1.12e-06	ATAAACAAACA
S. cryophilus	cry_chrIII	1464729	1464739	+	1.12e-06	ATAAACAAACA
S. cryophilus	cry_chrIII	1517411	1517421	-	1.12e-06	ATAAACAAACA
S. cryophilus	cry_chrIII	1567030	1567040	+	1.12e-06	ATAAACAAACA
S. cryophilus	cry_chrIII	1903922	1903932	+	1.12e-06	ATAAACAAACA
S. cryophilus	cry_chrIII	1974945	1974955	-	1.12e-06	ATAAACAAACA
S. cryophilus	cry_chrIII	2011403	2011413	-	1.12e-06	ATAAACAAACA
S. cryophilus	cry_chrIII	2060693	2060703	+	1.12e-06	ATAAACAAACA
S. cryophilus	cry_chrIII	2060797	2060807	+	1.12e-06	ATAAACAAACA
S. cryophilus	cry_chrIII	2514482	2514492	-	1.12e-06	ATAAACAAACA
S. cryophilus	cry_chrIII	2544286	2544296	-	1.12e-06	ATAAACAAACA
S. cryophilus	cry_chrIII	2544376	2544386	+	1.12e-06	ATAAACAAACA
S. cryophilus	cry_chrIII	2568032	2568042	-	1.12e-06	ATAAACAAACA
S. cryophilus	cry_chrIII	2697186	2697196	-	1.12e-06	ATAAACAAACA
S. cryophilus	cry_chrIII	2715908	2715918	+	1.12e-06	ATAAACAAACA
S. cryophilus	cry_chrIII	2778554	2778564	-	1.12e-06	ATAAACAAACA
S. cryophilus	cry_chrIII	2791115	2791125	-	1.12e-06	ATAAACAAACA
S. cryophilus	cry_chrIII	328045	328055	+	1.49e-06	GTAAACAAAGA
S. cryophilus	cry_chrIII	436063	436073	-	1.49e-06	GTAAACAAAGA
S. cryophilus	cry_chrIII	490160	490170	+	1.49e-06	GTAAACAAAGA
S. cryophilus	cry_chrIII	686965	686975	-	1.49e-06	GTAAACAAAGA
S. cryophilus	cry_chrIII	727603	727613	-	1.49e-06	GTAAACAAAGA
S. cryophilus	cry_chrIII	740366	740376	+	1.49e-06	GTAAACAAAGA
S. cryophilus	cry_chrIII	773374	773384	+	1.49e-06	GTAAACAAAGA
[truncated: 919 more rows]

## Sheet: 1i
	Locations of LTR sequences in S. osmophilus
Contig name	Minimum	Maximum	Length	Direction
tig00000002_pilon_x4	926604	926914	311	forward
tig00000002_pilon_x4	960943	961173	231	reverse
tig00000002_pilon_x4	1086112	1086272	161	forward
tig00000002_pilon_x4	1486806	1487064	259	reverse
tig00000002_pilon_x4	1739065	1739321	257	forward
tig00000002_pilon_x4	2075978	2076168	191	reverse
tig00000008_pilon_x4	149291	149447	157	reverse
tig00000011_pilon_x4	178131	178440	310	reverse
tig00000011_pilon_x4	182504	182573	70	reverse
tig00000011_pilon_x4	347514	347611	98	forward
tig00000011_pilon_x4	641645	641876	232	reverse
tig00000011_pilon_x4	947422	948175	754	forward
tig00000014_pilon_x4	50787	50882	96	forward
tig00000014_pilon_x4	51059	51108	50	reverse
tig00000014_pilon_x4	895702	896005	304	reverse
tig00000014_pilon_x4	897379	897684	306	reverse
tig00000014_pilon_x4	923738	923910	173	reverse
tig00000019_pilon_x4	8047	8289	243	reverse
tig00000019_pilon_x4	29564	29719	156	forward
tig00000019_pilon_x4	33799	33986	188	reverse
tig00000019_pilon_x4	114716	115024	309	reverse
tig00000019_pilon_x4	119193	119501	309	reverse
tig00000019_pilon_x4	386868	387055	188	forward
tig00000019_pilon_x4	390091	390396	306	forward
tig00007780_pilon_x4	824586	824894	309	reverse
tig00007780_pilon_x4	829049	829357	309	reverse
tig00007780_pilon_x4	1983832	1984141	310	reverse
tig00007782_pilon_x4 (reversed)	22782	22948	167	reverse
tig00007782_pilon_x4 (reversed)	23079	23387	309	reverse
tig00007782_pilon_x4 (reversed)	27566	27874	309	reverse
tig00007788_pilon_x4 (reversed)	400528	400761	234	reverse
tig00007788_pilon_x4 (reversed)	402687	402841	155	forward
tig00007788_pilon_x4 (reversed)	684161	684312	152	reverse
tig00007788_pilon_x4 (reversed)	773206	773511	306	reverse
tig00007788_pilon_x4 (reversed)	1209213	1209464	252	forward

[truncated: 10 more sheets: 1j, 1k, 1l, 1m, 1n, 1o, 1p, 1q, 1r, 1s]
