# Supplementary material for: The wtf meiotic driver gene family has unexpectedly persisted for over 100 million years
Source: eLife. 2022 Oct 13;11:e81149. doi: 10.7554/eLife.81149 (PMC9562144; doi:10.7554/eLife.81149)
Supplement: Supplementary file 2. — (a) Total viability numerical data summary. (b) wtf25(SOCG_04480) deletion related numerical data of the octad dissection analysis. (c) wtf68(SOCG_01240) deletion related numerical data of the octad dissection analysis. (d) wtf33 deletion related numerical data of the octad dissection analysis. (e) wtf46(SOCG_00084) deletion related numerical data of the octad dissection analysis. (f) wtf60(SOCG_04742) deletion related numerical data of the octad dissection analysis. (g) wtf62(SOCG_04077) deletion related numerical data of the octad dissection analysis. (h) wtf21(SOCG_02322) deletion related numerical data of the octad dissection analysis. (i) octo-pSIV-leu1-1D plasmid related numerical data of the octad spore dissection analysis. [file elife-81149-supp2.xlsx]

## Sheet: Table of contents
Table	Description
2a	Total viability numerical data summary
2b	wtf25(SOCG_04480) deletion related numerical data of the octad spore dissection analysis
2c	wtf68(SOCG_01240) deletion related numerical data of the octad spore dissection analysis
2d	wtf33 deletion related numerical data of the octad spore dissection analysis
2e	wtf46(SOCG_00084) deletion related numerical data of the octad spore dissection analysis
2f	wtf60(SOCG_04742) deletion related numerical data of the octad spore dissection analysis
2g	wtf62(SOCG_04077) deletion related numerical data of the octad spore dissection analysis
2h	wtf21(SOCG_02322) deletion related numerical data of the octad spore dissection analysis
2i	octo-pSIV-leu1-1D plasmid related numerical data of the octad spore dissection analysis

## Sheet: 2a
	Total viability numerical data summary
Diploid genotype	Number of octad	Number of viable spore	Number of inviable spores	Total number of spores	Viability
Wild type	151	1101	107	1208	0.911424
wtf25Δ/wtf25Δ	85	615	65	680	0.904412
wtf68Δ/wtf68Δ	66	482	46	528	0.912879
wtf33Δ/wtf33Δ	65	469	51	520	0.901923
wtf46Δ/wtf46Δ	58	439	25	464	0.946121
wtf60Δ/wtf60Δ	54	391	41	432	0.905093
wtf62Δ/wtf62Δ	55	414	26	440	0.940909
wtf21Δ/wtf21Δ	39	273	39	312	0.875
wtf25Δ/wtf25+	151	830	378	1208	0.687086
wtf68Δ/wtf68+	106	576	272	848	0.679245
wtf33Δ/wtf33+	108	638	226	864	0.738426
wtf46Δ/wtf46+	85	606	74	680	0.891176
wtf60Δ/wtf60+	131	917	131	1048	0.875
wtf62Δ/wtf62+	89	644	68	712	0.904494
wtf21Δ/wtf21+	102	704	112	816	0.862745

## Sheet: 2b
	wtf25(SOCG_04480) deletion related numerical data of the octad spore dissection analysis
Cross	Diploid Genotype	Number of octad	Number of viable spore	Number of inviable spores	Total number of spores	Viability	Number of spores that are viable and with the indicated genotype		% spores that are viable and with the indicated genotype		Transmission distortion ratio
							wtf25Δ	wtf25+	wtf25Δ	wtf25+
DY47906 × DY44286 DY47905 × DY44287	wtf25Δ/wtf25+	151	830	378	1208	0.687086	278	552	0.230132	0.456954	0.66506
Type of octad according to the numbers and genotypes of viable spores	4R4S	4R3S	3R4S	4R2S	2R4S	3R3S	4R1S	1R4S	3R2S	2R3S	3R1S	1R3S	2R2S	4R0S	0R4S	<= 3 viable spore
Number of octads	16	1	20	0	29	7	0	37	1	8	0	3	3	0	16	10

## Sheet: 2c
	wtf68(SOCG_01240) deletion related numerical data of the octad spore dissection analysis
Cross	Diploid Genotype	Number of octad	Number of viable spore	Number of inviable spores	Total number of spores	Viability	Number of spores that are viable and with the indicated genotype		% spores that are viable and with the indicated genotype		Transmission distortion ratio
							wtf68Δ	wtf68+	wtf68Δ	wtf68+
DY47920 × DY44286 DY47919 × DY44287	wtf68Δ/wtf68+	106	576	272	848	0.679245	212	364	0.25	0.429245	0.631944
Type of octad according to the numbers and genotypes of viable spores	4R4S	4R3S	3R4S	4R2S	2R4S	3R3S	4R1S	1R4S	3R2S	2R3S	3R1S	1R3S	2R2S	4R0S	0R4S	<= 3 viable spore
Number of octads	9	6	17	0	26	2	0	10	1	5	0	3	2	0	10	15

## Sheet: 2d
	wtf33 deletion related numerical data of the octad spore dissection analysis
Cross	Diploid Genotype	Number of octad	Number of viable spore	Number of inviable spores	Total number of spores	Viability	Number of spores that are viable and with the indicated genotype		% spores that are viable and with the indicated genotype		Transmission distortion ratio
							wtf33Δ	wtf33+	wtf33Δ	wtf33+
DY47903 × DY44286 DY47904 × DY44287	wtf33Δ/wtf33+	108	638	226	864	0.738426	267	371	0.309028	0.429398	0.581505
Type of octad according to the numbers and genotypes of viable spores	4R4S	4R3S	3R4S	4R2S	2R4S	3R3S	4R1S	1R4S	3R2S	2R3S	3R1S	1R3S	2R2S	4R0S	0R4S	<= 3 viable spore
Number of octads	20	3	18	2	15	10	1	11	5	5	0	2	3	0	4	9

## Sheet: 2e
	wtf46(SOCG_00084) deletion related numerical data of the octad spore dissection analysis
Cross	Diploid Genotype	Number of octad	Number of viable spore	Number of inviable spores	Total number of spores	Viability	Number of spores that are viable and with the indicated genotype		% spores that are viable and with the indicated genotype		Transmission distortion ratio
							wtf46Δ	wtf46+	wtf46Δ	wtf46+
DY47908 × DY44286 DY47907 × DY44287	wtf46Δ/wtf46+	85	606	74	680	0.891176	291	315	0.427941	0.463235	0.519802
Type of octad according to the numbers and genotypes of viable spores	4R4S	4R3S	3R4S	4R2S	2R4S	3R3S	4R1S	1R4S	3R2S	2R3S	3R1S	1R3S	2R2S	4R0S	0R4S	<= 3 viable spore
Number of octads	41	6	18	3	6	4	0	1	2	1	1	1	1	0	0	0

## Sheet: 2f
	wtf60(SOCG_04742) deletion related numerical data of the octad spore dissection analysis
Cross	Diploid Genotype	Number of octad	Number of viable spore	Number of inviable spores	Total number of spores	Viability	Number of spores that are viable and with the indicated genotype		% spores that are viable and with the indicated genotype		Transmission distortion ratio
							wtf60Δ	wtf60+	wtf60Δ	wtf60+
DY47922 × DY44286 DY47921 × DY44287	wtf60Δ/wtf60+	131	917	131	1048	0.875	440	477	0.419847	0.455153	0.520174
Type of octad according to the numbers and genotypes of viable spores	4R4S	4R3S	3R4S	4R2S	2R4S	3R3S	4R1S	1R4S	3R2S	2R3S	3R1S	1R3S	2R2S	4R0S	0R4S	<= 3 viable spore
Number of octads	65	10	21	0	6	11	0	4	4	2	1	3	1	0	0	3

## Sheet: 2g
	wtf62(SOCG_04077) deletion related numerical data of the octad spore dissection analysis
Cross	Diploid Genotype	Number of octad	Number of viable spore	Number of inviable spores	Total number of spores	Viability	Number of spores that are viable and with the indicated genotype		% spores that are viable and with the indicated genotype		Transmission distortion ratio
							wtf62Δ	wtf62+	wtf62Δ	wtf62+
DY47923 × DY44286 DY47924 × DY44287	wtf62Δ/wtf62+	89	644	68	712	0.904494	317	327	0.445225	0.45927	0.507764
Type of octad according to the numbers and genotypes of viable spores	4R4S	4R3S	3R4S	4R2S	2R4S	3R3S	4R1S	1R4S	3R2S	2R3S	3R1S	1R3S	2R2S	4R0S	0R4S	<= 3 viable spore
Number of octads	48	8	16	1	3	6	1	0	2	2	0	1	1	0	0	0

## Sheet: 2h
	wtf21(SOCG_02322) deletion related numerical data of the octad spore dissection analysis
Cross	Diploid Genotype	Number of octad	Number of viable spore	Number of inviable spores	Total number of spores	Viability	Number of spores that are viable and with the indicated genotype		% spores that are viable and with the indicated genotype		Transmission distortion ratio
							wtf21Δ	wtf21+	wtf21Δ	wtf21+
DY47925 × DY44286 DY47926 × DY44287	wtf21Δ/wtf21+	102	704	112	816	0.862745	357	347	0.4375	0.425245	0.492898
Type of octad according to the numbers and genotypes of viable spores	4R4S	4R3S	3R4S	4R2S	2R4S	3R3S	4R1S	1R4S	3R2S	2R3S	3R1S	1R3S	2R2S	4R0S	0R4S	<= 3 viable spore
Number of octads	47	13	16	1	3	9	0	0	3	0	3	0	3	1	0	3

## Sheet: 2i
	octo-pSIV-leu1-1D plasmid related numerical data of the octad spore dissection analysis
Cross	Diploid Genotype	Number of octad	Number of viable spore	Number of inviable spores	Total number of spores	Viability	% spores that are viable and with wtf25	% spores that are viable and without wtf25
DY47931 × DY47905	leu1Δ::wtf25/leu1+ wtf25Δ::kanSVEM/wtf25Δ::kanSVEM	56	329	119	448	0.734375	0.473214	0.261161
Cross	Diploid Genotype	Number of octad	Number of viable spore	Number of inviable spores	Total number of spores	Viability	% spores that are viable and with wtf25antidote	% spores that are viable and without wtf25antidote-only
DY47934 × DY47905	leu1Δ::wtf25antidote-only/leu1+ wtf25Δ::kanSVEM/wtf25Δ::kanSVEM	37	263	33	296	0.888514	0.456081	0.432432
Cross	Diploid Genotype	Number of octad	Number of viable spore	Number of inviable spores	Total number of spores	Viability	% spores that are viable and with the indicated genotype
							leu1Δ::vector wtf25+	leu1+ wtf25Δ::kanSVEM	leu1Δ::vector wtf25Δ::kanSVEM	leu1+ wtf25+
DY47933 × DY47905	leu1Δ::vector/leu1+ wtf25+/wtf25Δ::kanSVEM	44	252	100	352	0.715909	0.247159	0.139205	0.127841	0.201705
Cross	Diploid Genotype	Number of octad	Number of viable spore	Number of inviable spores	Total number of spores	Viability	% spores that are viable and with the indicated genotype
							leu1Δ::wtf25poison-only wtf25+	leu1+ wtf25Δ::kanSVEM	leu1Δ::wtf25poison-only wtf25Δ::kanSVEM	leu1+ wtf25+
DY47932 × DY47906	leu1Δ::wtf25poison-only/leu1+ wtf25+/wtf25Δ::kanSVEM	40	146	174	320	0.45625	0.20625	0.034375	0	0.215625
