# Supplementary material for: The wtf meiotic driver gene family has unexpectedly persisted for over 100 million years
Source: eLife. 2022 Oct 13;11:e81149. doi: 10.7554/eLife.81149 (PMC9562144; doi:10.7554/eLife.81149)
Supplement: Supplementary file 3. — (a) Yeast strain summary. (b) Oligos summary. (c) Plasmids summary. [file elife-81149-supp3.xlsx]

## Sheet: Table of contents
Table	Description
3a	Yeast strains summary
3b	Oligos summary
3c	Plasmids summary

## Sheet: 3a
	Yeast strains summary
yeast strains used
strain	species	genotype	reference	construction:	used in Figure:
SZY4097	Saccharomyces cerevisiae	a bar1- ura3-1;his3-11,15;leu2-3,112;trp1-1;ADE2;LYS2, PACT1-LexA-ER-haB42::HIS3 isolate 1 [URA3],[TRP1]	this study	pSZB459+ pSZB460 into SZY1637	Figure 7; Figure 7-figure supplements 1 and 2
SZY4262	Saccharomyces cerevisiae	a bar1- ura3-1;his3-11,15;leu2-3,112;trp1-1;ADE2;LYS2, PACT1-LexA-ER-haB42::HIS3 isolate 1 [URA3::S.osmophilus_wtf41 poison_g971],[TRP1]	this study	pSZB1327+pSZB459 in SZY1637	Figure 7
SZY4260	Saccharomyces cerevisiae	a bar1- ura3-1;his3-11,15;leu2-3,112;trp1-1;ADE2;LYS2, PACT1-LexA-ER-haB42::HIS3 isolate 1 [URA3],[TRP1::S.osmophilus_wtf41 antidote_g971]	this study	pSZB460+pSZB1325 in SZY1637	Figure 7
SZY4264	Saccharomyces cerevisiae	a bar1- ura3-1;his3-11,15;leu2-3,112;trp1-1;ADE2;LYS2, PACT1-LexA-ER-haB42::HIS3 isolate 1 [URA3::S.osmophilus_wtf41 poison_g971],[TRP1::S.osmophilus_wtf41 antidote_g971]	this study	pSZB1327+pSZB1325 in SZY1637	Figure 7
SZY4038	Saccharomyces cerevisiae	a bar1- ura3-1;his3-11,15;leu2-3,112;trp1-1;ADE2;LYS2, PACT1-LexA-ER-haB42::HIS3 isolate 1 [SPOG_3611_poison::URA3],[EV::TRP1]	this study	pSZB459+pSZB1122 into SZY1637	Figure 7
SZY4020	Saccharomyces cerevisiae	a bar1- ura3-1;his3-11,15;leu2-3,112;trp1-1;ADE2;LYS2, PACT1-LexA-ER-haB42::HIS3 isolate 2 [EV::URA3],[SPOG3611_antidote::TRP1]	this study	pSZB1192+pSZB460 into SZY1637	Figure 7
SZY4036	Saccharomyces cerevisiae	a bar1- ura3-1;his3-11,15;leu2-3,112;trp1-1;ADE2;LYS2, PACT1-LexA-ER-haB42::HIS3 isolate 1 [SPOG_3611_poison::URA3],[SPOG3611_antidote::TRP1]	this study	pSZB1192+pSZB1122 into SZY1637	Figure 7
SZY4357	Saccharomyces cerevisiae	a bar1- ura3-1;his3-11,15;leu2-3,112;trp1-1;ADE2;LYS2, PACT1-LexA-ER-haB42::HIS3 isolate 1 [URA3::SOCG_04480_poison_only_GFP],[TRP1]	this study	pSZB459+pSZB1353 into SZY1637	Figure 7
SZY4356	Saccharomyces cerevisiae	a bar1- ura3-1;his3-11,15;leu2-3,112;trp1-1;ADE2;LYS2, PACT1-LexA-ER-haB42::HIS3 isolate 1 [URA3],[TRP1::SOCG_04480_antidote_only_mCherry]	this study	pSZB460+pSZB1347 into SZY1637	Figure 7
SZY4360	Saccharomyces cerevisiae	a bar1- ura3-1;his3-11,15;leu2-3,112;trp1-1;ADE2;LYS2, PACT1-LexA-ER-haB42::HIS3 isolate 1 [URA3::SOCG_04480_poison_only_GFP],[TRP1::SOCG_04480_antidote_only_mCherry]	this study	pSZB1353+pSZB1347 into SZY1637	Figure 7
SZY4256	Saccharomyces cerevisiae	a bar1- ura3-1;his3-11,15;leu2-3,112;trp1-1;ADE2;LYS2, PACT1-LexA-ER-haB42::HIS3 isolate 1 [URA3::S.osmophilus_wtf19 poison_g12],[TRP1]	this study	pSZB1324+pSZB459 in SZY1637	figure 7-figure supplement 1
SZY4254	Saccharomyces cerevisiae	a bar1- ura3-1;his3-11,15;leu2-3,112;trp1-1;ADE2;LYS2, PACT1-LexA-ER-haB42::HIS3 isolate 1 [URA3],[TRP1::S.osmophilus_wtf19 antidote_g12]	this study	pSZB460+pSZB1322 in SZY1637	figure 7-figure supplement 1
SZY4258	Saccharomyces cerevisiae	a bar1- ura3-1;his3-11,15;leu2-3,112;trp1-1;ADE2;LYS2, PACT1-LexA-ER-haB42::HIS3 isolate 1 [URA3::S.osmophilus_wtf19 poison_g12],[TRP1::S.osmophilus_wtf19 antidote_g12]	this study	pSZB1324+pSZB1322 in SZY1637	figure 7-figure supplement 1
SZY3747	Saccharomyces cerevisiae	a bar1- ura3-1;his3-11,15;leu2-3,112;trp1-1;ADE2;LYS2, PACT1-LexA-ER-haB42::HIS3, [TRP1], [Sowtf61poison::URA3]	this study	pSZB459+pSZB1040 into SZY1637	figure 7-figure supplement 1
SZY3745	Saccharomyces cerevisiae	a bar1- ura3-1;his3-11,15;leu2-3,112;trp1-1;ADE2;LYS2, PACT1-LexA-ER-haB42::HIS3, [Sowtf61antidote::TRP1], [URA3]	this study	SZB1108+pSZB460 into SZY1637	figure 7-figure supplement 1
SZY3749	Saccharomyces cerevisiae	a bar1- ura3-1;his3-11,15;leu2-3,112;trp1-1;ADE2;LYS2, PACT1-LexA-ER-haB42::HIS3, [Sowtf61antidote::TRP1], [Sowtf61poison::URA3]	this study	pSZB1108+pSZB1040 into SZY1637	figure 7-figure supplement 1
SZY5158	Saccharomyces cerevisiae	a bar1- ura3-1;his3-11,15;leu2-3,112;trp1-1;ADE2;LYS2, PACT1-LexA-ER-haB42::HIS3 isolate 1 [URA3::S.osmophilus wtf41 poison],[TRP1::S. octosporus wtf61 antidote]	this study	pSZB1327+pSZB1108 into SZY1637	figure 7-figure supplement 2
SZY4541	Saccharomyces cerevisiae	a bar1- ura3-1;his3-11,15;leu2-3,112;trp1-1;ADE2;LYS2, PACT1-LexA-ER-haB42::HIS3 isolate 1 [URA3::S.octosporus wtf61 poison],[TRP1::S. osmophilus wtf41 antidote]	this study	pSZB1040+pSZB1325 into SZY1637	figure 7-figure supplement 3
SZY4547	Saccharomyces cerevisiae	a bar1- ura3-1;his3-11,15;leu2-3,112;trp1-1;ADE2;LYS2, PACT1-LexA-ER-haB42::HIS3 isolate 1 [URA3::S. cryophilus wtf1 poison],[TRP1::S. osmophilus wtf41 antidote]	this study	pSZB1122+pSZB1325 into SZY1637	figure 7-figure supplement 4
SZY4549	Saccharomyces cerevisiae	a bar1- ura3-1;his3-11,15;leu2-3,112;trp1-1;ADE2;LYS2, PACT1-LexA-ER-haB42::HIS3 isolate 1 [URA3::S. osmophilus wtf41 poison],[TRP1::S. cryophilus wtf1 antidote]	this study	pSZB1327+pSZB1192 into SZY1637	figure 7-figure supplement 5
SZY5160	Saccharomyces cerevisiae	a bar1- ura3-1;his3-11,15;leu2-3,112;trp1-1;ADE2;LYS2, PACT1-LexA-ER-haB42::HIS3 isolate 1 [URA3::S.octosporus wtf25 poison],[TRP1::S. octosporus wtf61 antidote]	this study	SZB1353+pSZB1108 into SZY1637	figure 7-figure supplement 6
SZY4537	Saccharomyces cerevisiae	a bar1- ura3-1;his3-11,15;leu2-3,112;trp1-1;ADE2;LYS2, PACT1-LexA-ER-haB42::HIS3 isolate 1 [URA3::S.octosporus wtf61 poison],[TRP1::S. octosporus wtf25 antidote]	this study	SZB1040+pSZB1347 into SZY1637	figure 7-figure supplement 7
SZY4543	Saccharomyces cerevisiae	a bar1- ura3-1;his3-11,15;leu2-3,112;trp1-1;ADE2;LYS2, PACT1-LexA-ER-haB42::HIS3 isolate 1 [URA3::S. cryophilus wtf1 poison],[TRP1::S. octosporus wtf25 antidote]	this study	pSZB1122+pSZB1347 into SZY1637	figure 7-figure supplement 8
SZY4545	Saccharomyces cerevisiae	a bar1- ura3-1;his3-11,15;leu2-3,112;trp1-1;ADE2;LYS2, PACT1-LexA-ER-haB42::HIS3 isolate 1 [URA3::S. octosporus wtf25 poison],[TRP1::S. cryophilus wtf1 antidote]	this study	pSZB1353+pSZB1192 into SZY1637	figure 7-figure supplement 9
SZY4630	Saccharomyces cerevisiae	a bar1- ura3-1;his3-11,15;leu2-3,112;trp1-1;ADE2;LYS2, PACT1-LexA-ER-haB42::HIS3 isolate 1 [URA3::S. pombe wtf4 poison],[TRP1::EV]	this study	pSZB585+pSZB459 into SZY1637	Figure 7-figure supplement 2E
SZY4632	Saccharomyces cerevisiae	a bar1- ura3-1;his3-11,15;leu2-3,112;trp1-1;ADE2;LYS2, PACT1-LexA-ER-haB42::HIS3 isolate 1 [URA3::S. pombe wtf4 poison],[TRP1::S. pombe wtf4 antidote]	this study	pSZB585+pSZB589 into SZY1637	Figure 7-figure supplement 2E
SZY1637	Saccharomyces cerevisiae	a bar1- ura3-1;his3-11,15;leu2-3,112;trp1-1;ADE2;LYS2, PACT1-LexA-ER-haB42::HIS3 isolate 1	Nucholls et al., 2020	Strain construction
DY44286	Schizosaccharomyces octosporus	h- mat2Δ&mat3Δ::bleMX6	T. Seike and H. Niki, 2017		Figure 8; Figure 9
DY44287	Schizosaccharomyces octosporus	h+ mat2Δ&mat3Δ::hphMX6	T. Seike and H. Niki, 2017		Figure 8; Figure 9
DY44617	Schizosaccharomyces octosporus	h+ mat2Δ&mat3Δ::hphMX6 leu1(SOCG_02003)Δ::natSVEM	this study	PCR-based gene targeting	Figure 2
DY44598	Schizosaccharomyces octosporus	h- mat2Δ&mat3Δ::bleMX6 leu1(SOCG_02003)Δ::kanSVEM	this study	PCR-based gene targeting	Figure 2
DY47905	Schizosaccharomyces octosporus	h- mat2Δ&mat3Δ::bleMX6 wtf25(SOCG_04480)Δ::kanSVEM	this study	PCR-based gene targeting	Figure 8; Figure 9; Figure 10
DY47906	Schizosaccharomyces octosporus	h+ mat2Δ&mat3Δ::hphMX6 wtf25(SOCG_04480)Δ::kanSVEM	this study	PCR-based gene targeting	Figure 8; Figure 9; Figure 10
DY47903	Schizosaccharomyces octosporus	h+ mat2Δ&mat3Δ::hphMX6 wtf33Δ::kanSVEM	this study	PCR-based gene targeting	Figure 8; Figure 9-figure supplement 2
DY47904	Schizosaccharomyces octosporus	h- mat2Δ&mat3Δ::bleMX6 wtf33Δ::kanSVEM	this study	PCR-based gene targeting	Figure 8; Figure 9-figure supplement 2
DY47919	Schizosaccharomyces octosporus	h- mat2Δ&mat3Δ::bleMX6 wtf68(SOCG_01240)Δ::kanSVEM	this study	PCR-based gene targeting	Figure 8; Figure 9-figure supplement 1
DY47920	Schizosaccharomyces octosporus	h+ mat2Δ&mat3Δ::hphMX6 wtf68(SOCG_01240)Δ::kanSVEM	this study	PCR-based gene targeting	Figure 8; Figure 9-figure supplement 1
DY47907	Schizosaccharomyces octosporus	h- mat2Δ&mat3Δ::bleMX6 wtf46(SOCG_00084)Δ::kanSVEM	this study	PCR-based gene targeting	Figure 8; Figure 9-figure supplement 3
DY47908	Schizosaccharomyces octosporus	h+ mat2Δ&mat3Δ::hphMX6 wtf46(SOCG_00084)Δ::kanSVEM	this study	PCR-based gene targeting	Figure 8; Figure 9-figure supplement 3
DY47921	Schizosaccharomyces octosporus	h- mat2Δ&mat3Δ::bleMX6 wtf60(SOCG_04742)Δ::kanSVEM	this study	PCR-based gene targeting	Figure 8; Figure 9-figure supplement 4
DY47922	Schizosaccharomyces octosporus	h+ mat2Δ&mat3Δ::hphMX6 wtf60(SOCG_04742)Δ::kanSVEM	this study	PCR-based gene targeting	Figure 8; Figure 9-figure supplement 4
DY47923	Schizosaccharomyces octosporus	h+ mat2Δ&mat3Δ::hphMX6 wtf62(SOCG_04077)Δ::kanSVEM	this study	PCR-based gene targeting	Figure 8; Figure 9-figure supplement 5
DY47924	Schizosaccharomyces octosporus	h- mat2Δ&mat3Δ::bleMX6 wtf62(SOCG_04077)Δ::kanSVEM	this study	PCR-based gene targeting	Figure 8; Figure 9-figure supplement 5
DY47925	Schizosaccharomyces octosporus	h+ mat2Δ&mat3Δ::hphMX6 wtf21(SOCG_02322)Δ::kanSVEM	this study	PCR-based gene targeting	Figure 8; Figure 9-figure supplement 6
DY47926	Schizosaccharomyces octosporus	h- mat2Δ&mat3Δ::bleMX6 wtf21(SOCG_02322)Δ::kanSVEM	this study	PCR-based gene targeting	Figure 8; Figure 9-figure supplement 6
DY47931	Schizosaccharomyces octosporus	h+ mat2Δ&mat3Δ::hphMX6 wtf25(SOCG_04480)Δ::kanSVEM leu1(SOCG_02003)Δ::wtf25(SOCG_04480)-natMX	this study	Transform NotI linearized pDB4979 into DY44287 and cross the resulting strain with DY47905 to select wtf25 deletion genotype and plasmid integration genotype co-segregated progeny.	Figure 10
DY47932	Schizosaccharomyces octosporus	h- mat2Δ&mat3Δ::bleMX6 leu1(SOCG_02003)Δ::wtf25(SOCG_04480)poison-only-natMX	this study	Transform NotI linearized pDB4980 into DY44286.	Figure 10
DY47933	Schizosaccharomyces octosporus	h+ mat2Δ&mat3Δ::hphMX6 leu1(SOCG_02003)Δ::MCS-natMX	this study	Transform NotI linearized pDB4978 into DY44287.	Figure 10
DY47934	Schizosaccharomyces octosporus	h+ mat2Δ&mat3Δ::hphMX6 wtf25(SOCG_04480)Δ::kanSVEM leu1(SOCG_02003)Δ::wtf25(SOCG_04480)antidote-only-natMX	this study	Transform NotI linearized pDB4981 into DY44286 and cross the resulting strain with DY47906 to select progenies containing wtf25 deletion genotype and plasmid integration.	Figure 10

## Sheet: 3b
	Oligos summary
oligos	Alias	sequence	description	Reference
oGS-1	oTS13	TTTGGAAATGTTTAAGTGGGATTTGATTCTGTCA	Mating type PCR primer for S.octosporus from Niki's 2017 paper (Universal primer)	(T. Seike and H. Niki, 2017)
oGS-2	oTS103	CTTGACACACTCTGCACAGGTATCT	Mating type PCR primer for S.octosporus from Niki's 2017 paper (Spefific primer for h+)	(T. Seike and H. Niki, 2017)
oGS-3	oTS110	TCCTCTTTCCAAAGTTGACCAACCAG	Mating type PCR primer for S.octosporus from Niki's 2017 paper (Spefific primer for h-)	(T. Seike and H. Niki, 2017)
oGS-24	4480_up-arm-F	CCTGTAAAGTGATTGAAACTCTTCAGT	wtf25(SOCG_04480) knockout cassette upstream-arm forward primer
oGS-26	4480_up-arm_SVEM-R	agggttgagtgttgttccagCCAGCTAAGCCGATGCTTTTCAAT	wtf25(SOCG_04480) knockout cassette upstream-arm reverse primer (overlap with P495)
oGS-27	4480_down-arm-R	CCGATTTACGAGTGATGGAATCTT	wtf25(SOCG_04480) knockout downstream-arm reverse primer
oGS-29	4480_down-arm_SVEM-F	ggttaatttcgagcttggcgGAGGCGTTCTCTGAGCGGTAGG	wtf25(SOCG_04480) knockout downstream-arm forward primer (overlap with P496)
oGS-30	new-0084_up-arm-F	GTCTGTGCAAGACAGAATAGACG	wtf46(SOCG_00084) knockout upstream-arm forward primer
oGS-31	new-0084_up-arm_SVEM-R	agggttgagtgttgttccagCCGTTTAGAAGCTTACACTTCATATG	wtf46(SOCG_00084) knockout upstream-arm reverse primer (overlap with P495)
oGS-32	new-0084_down-arm_SVEM-F	ggttaatttcgagcttggcgCCAGCCTCTTTGATCATTTTCAAG	wtf46(SOCG_00084) knockout downstream-arm forward primer (overlap with P495)
oGS-33	new-0084_down-arm-R	CTTCTGATGAATGAGTAACTGAGGT	wtf46(SOCG_00084) knockout downstream-arm reverse primer
oGS-39	kan_SVEM-ver-R	GCCATGTTTCAGAAACAACTCT	Verification primer F on 5' end of kan-marker CDS region
oGS-40	kan_SVEM-ver-F	GCAGTTTCATTTGATGCTCGAT	Verification primer R on 3' end of kan-marker CDS region
oGS-69	4480-Left_primer	TGCCCCCGAATATGCAAAGT	Forward primer for amplifying wtf25(SOCG_04480) gene locus(including flanking 5S rDNA) from genomic DNA
oGS-70	4480-Right_primer	CCTCGGAAAAGTCTGACGCT	Reverse primer for amplifying wtf25(SOCG_04480) gene locus(including flanking 5S rDNA) from genomic DNA
oGS-109	4480-pi-MtoA-F	TGCCATTGCAAAAgcGAAGAATAAATAC	In order to introduce MtoA mutation at the start codon of wtf25(SOCG_04480) antidote protein, this is the forward primer to amplify the target sequence. Mutation is designed on the primer.
oGS-110	4480-pi-MtoA-R	GTATTTATTCTTCgcTTTTGCAATGGCA	In order to introduce MtoA mutation at the start codon of wtf25(SOCG_04480) antidote protein, this is the reverse primer to amplify the target sequence. Mutation is designed on the primer.
oGS-111	4480-ki-MtoA-F	TGATTTAGAAgcGGCTGATGGATC	In order to introduce MtoA mutation at the start codon into wtf25(SOCG_04480) poison protein, this is the forward primer to amplify the target sequence. Mutation is designed on the primer.
oGS-112	4480-ki-MtoA-R	GATCCATCAGCCgcTTCTAAATCA	In order to introduce MtoA mutation at the start codon into wtf25(SOCG_04480) poison protein, this is the reverse primer to amplify the target sequence. Mutation is designed on the primer.
oGS-123	wtf21_up-F	gaatcagcaatagagtctgctg	wtf21(SOCG_02322) knockout cassette upstream-arm forward primer
oGS-124	wtf21_up-SVEM-R	agggttgagtgttgttccaggactgatctagctaaatacattgttc	wtf21(SOCG_02322) knockout cassette upstream-arm reverse primer (overlap with P495)
oGS-125	wtf21_down-SVEM-F	ggttaatttcgagcttggcggctgaatgtatgcgttaagag	wtf21(SOCG_02322) knockout downstream-arm forward primer (overlap with P496)
oGS-126	wtf21_down-R	cattgtataatcataaggatgtgcga	wtf21(SOCG_02322) knockout downstream-arm reverse primer
oGS-141	wtf60_up-F	gcagcaattgtgcattacttc	wtf60(SOCG_04742) knockout cassette upstream-arm forward primer
oGS-142	wtf60_up-SVEM-R	agggttgagtgttgttccagctctgttcaccattgagagtgaaa	wtf60(SOCG_04742) knockout cassette upstream-arm reverse primer (overlap with P495)
oGS-143	wtf60_down-SVEM-F	ggttaatttcgagcttggcgcgacaagatactatgtgattatttcc	wtf60(SOCG_04742) knockout downstream-arm forward primer (overlap with P496)
oGS-144	wtf60_down-R	gttatctatgtcgctactcacgac	wtf60(SOCG_04742) knockout downstream-arm reverse primer
oGS-147	wtf62_up-F	catcgtatgttcatcaataaggtgt	wtf62(SOCG_04077) knockout cassette upstream-arm forward primer
oGS-148	wtf62_up-SVEM-R	agggttgagtgttgttccagcttatgaagcaaggctagctag	wtf62(SOCG_04077) knockout cassette upstream-arm reverse primer (overlap with P495)
oGS-149	wtf62_down-SVEM-F	ggttaatttcgagcttggcgcggtacggatcctaagttagat	wtf62(SOCG_04077) knockout downstream-arm forward primer (overlap with P496)
oGS-150		gttgatttggttgttgctacaac	wtf62(SOCG_04077) knockout downstream-arm reverse primer
oGS-192	octo_leu1_1D-up-NotI-F	CGAAATAAGAAGTTGcggccgcGTAGTGTAACTTTTGCTAGATGTT	forward primers for amplification of leu1 locus 5' fragment sequence, with NotI enzyme cutting site and 15bp overlapping sequence with oGS-195 added
oGS-193	octo_leu1-1D-up-R	cgggtattagtcaaaTTATGTTCTTGttACTCGAACTTGAG	reverse primers for amplification of leu1 locus 5' fragment sequence, with 15bp overlapping with backbone-1 from pAV0854
oGS-195	octo_leu1-1D-down-NotI-R	gcggccgCAACTTCTTATTTCGCGGTAAATA	reverse primers for amplification of leu1 locus 3' fragment sequence, with NotI enzyme cutting site added
oGS-197	octo_leu1-1D-down-F	tcacaccgccctagcCAAGTAACAGTTTACGTGCTATG	forward primers for amplification of leu1 locus 3' fragment sequence, with 15bp overlapping with backbone-2 from pAV0854
oGS-201	SOCG_01240-up-F	gtgaagaagctcttacctgatcg	wtf68(SOCG_01240) knockout cassette upstream-arm forward primer
oGS-202	SOCG_01240-up-SVEM-R	agggttgagtgttgttccaggctcggatgtgacaagatctaa	wtf68(SOCG_01240) knockout cassette upstream-arm reverse primer (overlap with P495)
oGS-203	SOCG_01240-down-SVEM-F	ggttaatttcgagcttggcgcgggatactctcacattcgta	wtf68(SOCG_01240) knockout downstream-arm forward primer (overlap with P496)
oGS-204	SOCG_01240-down-R	cgctacatcgttagttgatca	wtf68(SOCG_01240) knockout downstream-arm reverse primer
oGS-219	new4-up-F	ggctattactgggatcattattgac	wtf33 knockout cassette upstream-arm forward primer
oGS-220	new4-up-SVEM-R	agggttgagtgttgttccagctgctacaattcctaagacataatc	wtf33 knockout cassette upstream-arm reverse primer (overlap with P495)
oGS-221	new4-down-SVEM-F	ggttaatttcgagcttggcggacacctatcactattgttaagcaa	wtf33 knockout downstream-arm forward primer (overlap with P496)
oGS-222	new4-down-R	ctactcaatgaactatccggttc	wtf33 knockout downstream-arm reverse primer
oGS-271	P495	ctggaacaacactcaaccctatctcgg	forward primer for amplifying kanSVEM targeting cassette
oGS-272	P496	cgccaagctcgaaattaaccctcac	reverse primer for amplifying kanSVEM targeting cassette
1442		ATTATTGGCCGCCTCGGCC TCA AAC TTC AGC GCT TTG CCC AGC AAA AG	reverse oligo to clone octosporus S. octosporus wtf61 (SOCG _044114)
1432		ATTATTCTCGAG ATGGCTGATGGATCTGCTCAGCATTC	Forward oligo to amplify SOCG_04114 wtf61
1195		tatatggtaccGCCGCCATCCAGTGTTTAAAC	Forward primer to amplify lexA boxes with KpnI site	(Nuckolls et al., 2020)
1240		tatatctcgagTATCGAATTCCTGCAGCCCG	Reverse primer to amplify lexA boxes with XhoI site	(Nuckolls et al., 2020)
2011		ATTATTCTCGAG ATGAAGAATAATTACACTCCAGTTTCAG	Forward to amplify exon 1 of SOCG_04114 with XhoI tails
2170		AAATAGGATCC CAAATTAAAGCCTTCGAGCG	Reverse oligo cycT with BamHI tails
2194		AGCTACTTACCATGGGGCCGTCAAACTTCAGCGCTTTGCC	Rerverse primer of S. octosporus wtf61 antidote with cycT tails
2195		GGCAAAGCGCTGAAGTTTGACGGCCCCATGGTAAGTAGCT	Forward primer of cycT with S. octosporus wtf61 antidote tails
2277		aaatctCTCGAG ATGGCTCCTGAAACAGAAGAAAGT	Forward to amplify gblock poison SPOG_03611 and SPOG_01632 with XhoI tails
2278		AGCTACTTACCATGGGGCCGTCAAACATTAGCCCTTTGCT	Reverse to amplify gblock SPOG_03611 wtf1 with cycT tails
2279		AGCAAAGGGCTAATGTTTGACGGCCCCATGGTAAGTAGCT	Forward to amplify gblock cycT tails with SPOG_03611 wtf1 tails
2276		aaatctCTCGAG ATGAAAAACAAGTACTCCCCTATTTCAG	Forward to amplify gblock SPOG_03611 wtf1 with XhoI tails
2778		TGAAATAGGAGTGTATTTGTTTTTCATGTATCGAATTCCTGCAGCCCGGGGGA	Reverse amplify LexA with S. osmophilus wtf42 971g antidote tails
2779		TCCCCCGGGCTGCAGGAATTCGATACATGAAAAACAAATACACTCCTATTTCA	Forward S. osmophilus wtf42 971g antidote with LexA tails
2780		AGCTACTTACCATGGGGCCGTTAAACTTCAGCGCTTTGCTCAGCA	Reverse amplify S. osmophilus wtf41 with cycT tails
2781		TGCTGAGCAAAGCGCTGAAGTTTAACGGCCCCATGGTAAGTAGCT	Forward amplify cycT with S. osmophilus wtf41 tails
2782		AATTCTGAGCGGATCCATCAGCCATGTATCGAATTCCTGCAGCCCGGGGGA	Reverse amplify LexA with S. osmophilus wtf41 971g poison tails
2783		TCCCCCGGGCTGCAGGAATTCGATACATGGCTGATGGATCCGCTCAGAATT	Forward S. osmophilus wtf41 971g poison with LexA tails
2668		TGCTGAGCGGATCCATCAGCCATGTATCGAATTCCTGCAGCCCGGGGGA	Rerverse amplify LexA with SOCG_04480 S. octosporus wtf25 poison tails
2669		TCCCCCGGGCTGCAGGAATTCGATACATGGCTGATGGATCCGCTCAGCA	Forward amplify SOCG_04480 S. octosporus wtf25 poison with LexA tails
2830		AATTCTTCACCTTTAGACATACCACCACCACCACCACCAACTTCAGCCCTTTGCTCAGCA	Rerverse amplify SOCG_04480 S. octosporus wtf25 poison with linker and yeGFP tails
2831		TGCTGAGCAAAGGGCTGAAGTTGGTGGTGGTGGTGGTGGTATGTCTAAAGGTGAAGAATT	Forward amplify linker and yeGFP with SOCG_04480 S. octosporus wtf25 poison tails
2832		CGGTTAGCTACTTACCATGGGGCCGTTATTTGTACAATTCATCAATACCA	Rerverse amplify yeGFP with cycT tails
2833		TGGTATTGATGAATTGTACAAATAACGGCCCCATGGTAAGTAGCTAACCG	Forward amplify cycT with yeGFP tails
2661		AACAGGACTGTATTTATTCTTCATGTATCGAATTCCTGCAGCCCGGGGGA	Reverse to amplify LexA boxes with SOCG_04480 S. octosporus wtf25 tails
2662		TCCCCCGGGCTGCAGGAATTCGATACATGAAGAATAAATACAGTCCTGTT	Forward to amplify SOCG_4480 S. octosporus wtf25 gblock with LexA boxes tails
2663		TCCTCGCCCTTGCTCACCATACCACCACCACCACCACCAACTTCAGCCCTTTGCTCAGCA	Reverse to amplify SOCG_4480 S. octosporus wtf25 gblock with mCherry tails
2664		TGCTGAGCAAAGGGCTGAAGTTGGTGGTGGTGGTGGTGGTATGGTGAGCAAGGGCGAGGA	Forward to amplify mCherry with SOCG_4480 S. octosporus wtf25 gblock tails
2665		CGGTTAGCTACTTACCATGGGGCCGTCACTTGTACAGCTCGTCCATGCCG	Reverse to amplify mcherry with cycT tails
2666		CGGCATGGACGAGCTGTACAAGTGACGGCCCCATGGTAAGTAGCTAACCG	Forward to amplify cycT with mCherry tails
2771		AATATAGGTACC CAAATTAAAGCCTTCGAGCG	amplify cycT with KPNI site

## Sheet: 3c
	Plasmids summary
plasmids used
plasmid	description	Reference
pRS314	Empty Vector::TRP1	Sikorski et al., 1989
pRS316	Empty Vector::URA3	Sikorski et al., 1989
pDK20	pGAL::URA3	DasGupta et al., 1998
pSZB985	S. octosporus wtf61poison only allele primers 1432-1442 into pDK20 into pSZB385	this study
pSZB1040	LexA-S. octosporus wtf61poison::URA3	this study
pSZB1108	LexA-S. octosporus wtf61antidote::TRP1	this study
pSZB1327	LexA-S. osmophilus wtf41poison::URA3	this study
pSZB1325	LexA-S. osmophilus wtf41antidote::TRP1	this study
pSZB1122	LexA-S. cryophilus wtf1poison::URA3	this study
pSZB1192	LexA-S. cryophilus wtf1antidote::TRP1	this study
pSZB1324	LexA-S. osmophilus wtf19poison::URA3	this study
pSZB1322	LexA-S. osmophilus wtf19antidote::TRP1	this study
pSZB1353	LexA-S. octosporus wtf25poison-GFP::URA3	this study
pSZB1347	LexA-S. octosporus wtf25antidote-mCh::TRP1	this study
pSZB585	LexA-wtf4poison-GFP::URA3	Nucholls et al., 2020
pSZB589	LexA-wtf4antidote::TRP1	Nucholls et al., 2020
pSZB457	pFA6-mCherry-KanMX	Bahler et al., 1998
pDB4978	S. octosporus-pSIV-leu1-1D-MCS-natMX	this study
pDB4979	S. octosporus-pSIV-leu1-1D-wtf25(5S-5S)-natMX	this study
pDB4980	octo-pSIV-leu1-1D-wtf25poison-only(5S-5S)-natMX	this study
pDB4981	octo-pSIV-leu1-1D-wtf25antidote-only(5S-5S)-natMX	this study
pDB728	pSVEM-kan	(Erler et al. 2006)
pKT0127	pFA6a – link – yEGFP – Kan Cterm tagging	(Sheff and Thorn, 2004)
